# Supplementary material for: Important Food Sources of Fructose-Containing Sugars and Non-Alcoholic Fatty Liver Disease: A Systematic Review and Meta-Analysis of Controlled Trials
Source: MDPI journal article supplement (doi:10.3390/nu14142846), 2022-07-12
Supplement: s1 [file s1]

## Online supplementary File to “Important Food Sources of Fructose-Containing Sugars and Non-Alcoholic Fatty Liver Disease: A Systematic Review and Meta-Analysis of Controlled Trials”

All Supplementary references are found within the Supplementary bibliography.

### Table of Contents

|                                                                                                                                                                                                                                                  |    |
|--------------------------------------------------------------------------------------------------------------------------------------------------------------------------------------------------------------------------------------------------|----|
| Supplementary Tables .....                                                                                                                                                                                                                       | 7  |
| Supplementary Table S1: PRISMA Checklist .....                                                                                                                                                                                                   | 7  |
| Supplementary Table S2: Search strategy for controlled trials assessing the effect of important food sources of fructose-containing sugars and NAFLD outcomes .....                                                                              | 10 |
| Supplementary Table S3: PICO framework of the search strategy .....                                                                                                                                                                              | 12 |
| Supplementary Table S4: Food source of fructose-containing sugars definitions .....                                                                                                                                                              | 13 |
| Supplementary Table S5: Trial characteristics .....                                                                                                                                                                                              | 14 |
| Supplementary Table S6: Sensitivity analyses of the use of correlation coefficients of 0.25 and 0.75 for crossover trials in the primary analysis of the effect of important food sources of fructose-containing sugars and NAFLD outcomes ..... | 22 |
| Supplementary Table S7: GRADE certainty of evidence assessment for the effect of fructose-containing sugars and NAFLD outcomes by levels of energy control .....                                                                                 | 24 |
| Supplementary Table S8: GRADE certainty of evidence assessment for the effect of fructose-containing sugars and NAFLD outcomes by important food source of fructose-containing sugars .....                                                      | 27 |
| Supplementary Table S9: Potential mechanisms to explain the effect of food sources of fructose-containing sugars and non-alcoholic fatty liver disease .....                                                                                     | 31 |
| Supplementary Figures .....                                                                                                                                                                                                                      | 33 |
| Supplementary Figure S1: Risk of bias proportion graph for the effect of important food sources of fructose-containing sugars and IHCL (SMD) in substitution trials .....                                                                        | 33 |
| Supplementary Figure S2: Risk of bias proportion graph for the effect of important food sources of fructose-containing sugars and IHCL (SMD) in addition trials .....                                                                            | 33 |
| Supplementary Figure S3: Risk of bias proportion graph for the effect of important food sources of fructose-containing sugars and IHCL (SMD) in subtraction trials .....                                                                         | 34 |
| Supplementary Figure S4: Risk of bias proportion graph for the effect of important food sources of fructose-containing sugars and ALT (U/L) in substitution trials .....                                                                         | 34 |
| Supplementary Figure S5: Risk of bias proportion graph for the effect of important food sources of fructose-containing sugars and ALT (U/L) in addition trials .....                                                                             | 35 |
| Supplementary Figure S6: Risk of bias proportion graph for the effect of important food sources of fructose-containing sugars and ALT (U/L) in subtraction trials .....                                                                          | 35 |
| Supplementary Figure S7: Risk of bias proportion graph for the effect of important food sources of fructose-containing sugars and ALT (U/L) in <i>ad libitum</i> trials .....                                                                    | 36 |
| Supplementary Figure S8: Risk of bias proportion graph for the effect of important food sources of fructose-containing sugars and AST (U/L) in substitution trials .....                                                                         | 36 |
| Supplementary Figure S9: Risk of bias proportion graph for the effect of important food sources of fructose-containing sugars and AST (U/L) in addition trials .....                                                                             | 37 |
| Supplementary Figure S10: Risk of bias proportion graph for the effect of important food sources of fructose-containing sugars and AST (U/L) in subtraction trials .....                                                                         | 37 |
| Supplementary Figure S11: Risk of bias proportion graph for the effect of important food sources of fructose-containing sugars and AST (U/L) in <i>ad libitum</i> trials .....                                                                   | 38 |

|                                                                                                                                                                                                                                      |    |
|--------------------------------------------------------------------------------------------------------------------------------------------------------------------------------------------------------------------------------------|----|
| Supplementary Figure S12: Forest plot of controlled trials of the effect of important food sources of fructose-containing sugars and IHCL (SMD) in substitution trials .....                                                         | 39 |
| Supplementary Figure S13: Forest plot of controlled trials of the effect of important food sources of fructose-containing sugars and IHCL (SMD) in addition trials .....                                                             | 41 |
| Supplementary Figure S14: Forest plot of controlled trials of the effect of important food sources of fructose-containing sugars and IHCL (SMD) in subtraction trials .....                                                          | 42 |
| Supplementary Figure S15: Forest plot of controlled trials of the effect of important food sources of fructose-containing sugars and ALT (U/L) in substitution trials .....                                                          | 43 |
| Supplementary Figure S16: Forest plot of controlled trials of the effect of important food sources of fructose-containing sugars and ALT (U/L) in addition trials.....                                                               | 45 |
| Supplementary Figure S17: Forest plot of controlled trials of the effect of important food sources of fructose-containing sugars and ALT (U/L) in subtraction trials .....                                                           | 47 |
| Supplementary Figure S18: Forest plot of controlled trials of the effect of important food sources of fructose-containing sugars and ALT (U/L) in <i>ad libitum</i> trials .....                                                     | 48 |
| Supplementary Figure S19: Forest plot of controlled trials of the effect of important food sources of fructose-containing sugars and AST (U/L) in substitution trials .....                                                          | 49 |
| Supplementary Figure S20: Forest plot of controlled trials of the effect of important food sources of fructose-containing sugars and AST (U/L) in addition trials.....                                                               | 51 |
| Supplementary Figure S21: Forest plot of controlled trials of the effect of important food sources of fructose-containing sugars and AST (U/L) in subtraction trials .....                                                           | 53 |
| Supplementary Figure S22: Forest plot of controlled trials of the effect of important food sources of fructose-containing sugars and AST (U/L) in <i>ad libitum</i> trials.....                                                      | 54 |
| Supplementary Figure S23: Sensitivity analysis of the systematic removal of each trial for the effect of important food sources of fructose-containing sugars and IHCL (SMD) in substitution trials.....                             | 55 |
| Supplementary Figure S24: Sensitivity analysis of the systematic removal of each trial for the effect of important food sources of fructose-containing sugars and IHCL (SMD) in addition trials .....                                | 56 |
| Supplementary Figure S25: Sensitivity analysis of the systematic removal of each trial in the primary analysis of the effect of important food sources of fructose-containing sugars and IHCL (SMD) in subtraction trials .....      | 56 |
| Supplementary Figure S26: Sensitivity analysis of the systematic removal of each trial for the effect of important food sources of fructose-containing sugars and ALT (U/L) in substitution trials.....                              | 57 |
| Supplementary Figure S27: Sensitivity analysis of the systematic removal of each trial for the effect of important food sources of fructose-containing sugars and ALT (U/L) in addition trials .....                                 | 58 |
| Supplementary Figure S28: Sensitivity analysis of the systematic removal of each trial for the effect of important food sources of fructose-containing sugars and ALT (U/L) in subtraction trials .....                              | 59 |
| Supplementary Figure S29: Sensitivity analysis of the systematic removal of each trial for the effect of important food sources of fructose-containing sugars and ALT (U/L) in <i>ad libitum</i> trials.....                         | 59 |
| Supplementary Figure S30: Sensitivity analysis of the systematic removal of each trial for the effect of important food sources of fructose-containing sugars and AST (U/L) in substitution trials.....                              | 60 |
| Supplementary Figure S31: Sensitivity analysis of the systematic removal of each trial for the effect of important food sources of fructose-containing sugars and AST (U/L) in addition trials .....                                 | 61 |
| Supplementary Figure S32: Sensitivity analysis of the systematic removal of each trial in the primary analysis of the effect of important food sources of fructose-containing sugars and AST (U/L) in subtraction trials.....        | 62 |
| Supplementary Figure S33: Sensitivity analysis of the systematic removal of each trial in the primary analysis of the effect of important food sources of fructose-containing sugars and AST (U/L) in <i>ad libitum</i> trials ..... | 62 |
| Supplementary Figure S34: Sensitivity analysis of the systematic removal of each trial for the effect of SSBs on ALT (U/L) in addition trials .....                                                                                  | 63 |

|                                                                                                                                                                                                                                                          |    |
|----------------------------------------------------------------------------------------------------------------------------------------------------------------------------------------------------------------------------------------------------------|----|
| Supplementary Figure S35: Sensitivity analysis of the systematic removal of each trial for the effect of 100% fruit juice on ALT (U/L) in addition trials.....                                                                                           | 64 |
| Supplementary Figure S36: Sensitivity analysis of the systematic removal of each trial for the effect of fruit on ALT (U/L) in addition trials .....                                                                                                     | 64 |
| Supplementary Figure S37: Sensitivity analysis of the systematic removal of each trial for the effect of dried fruit on ALT (U/L) in addition trials .....                                                                                               | 65 |
| Supplementary Figure S38: Sensitivity analysis of the systematic removal of each trial for the effect of honey on ALT (U/L) in addition trials .....                                                                                                     | 65 |
| Supplementary Figure S39: Sensitivity analysis of the systematic removal of each trial for the effect of important food sources of fructose-containing sugars and ALT (U/L) in subtraction SSB trials .....                                              | 66 |
| Supplementary Figure S40: Sensitivity analysis of the systematic removal of each trial for the effect of important food sources of fructose-containing sugars and ALT (U/L) in subtraction mixed sources (with SSBs) trials .....                        | 66 |
| Supplementary Figure S41: Sensitivity analysis of the systematic removal of each trial for the effect of important food sources of fructose-containing sugars and AST (U/L) in addition SSB trials .....                                                 | 67 |
| Supplementary Figure S42: Sensitivity analysis of the systematic removal of each trial for the effect of important food sources of fructose-containing sugars and AST (U/L) in addition 100% fruit juice trials .....                                    | 67 |
| Supplementary Figure S43: Sensitivity analysis of the systematic removal of each trial for the effect of important food sources of fructose-containing sugars and AST (U/L) in addition fruit trials .....                                               | 68 |
| Supplementary Figure S44: Sensitivity analysis of the systematic removal of each trial for the effect of important food sources of fructose-containing sugars and AST (U/L) in addition dried fruit trials .....                                         | 68 |
| Supplementary Figure S45: Sensitivity analysis of the systematic removal of each trial for the effect of important food sources of fructose-containing sugars and AST (U/L) in addition honey trials.....                                                | 69 |
| Supplementary Figure S46: Sensitivity analysis of the systematic removal of each trial in the primary analysis of the effect of important food sources of fructose-containing sugars and AST (U/L) in subtraction SSB trials.....                        | 69 |
| Supplementary Figure S47: Sensitivity analysis of the systematic removal of each trial in the primary analysis of the effect of important food sources of fructose-containing sugars and AST (U/L) in subtraction mixed sources (with SSBs) trials ..... | 70 |
| Supplementary Figure S48 (part 1 of 3): Subgroup analyses for the effect of important food sources of fructose-containing sugars and IHCL (SMD) in substitution trials .....                                                                             | 71 |
| Supplementary Figure S48 (part 2 of 3): Subgroup analyses for the effect of important food sources of fructose-containing sugars and IHCL (SMD) in substitution trials .....                                                                             | 72 |
| Supplementary Figure S48 (part 3 of 3): Subgroup analyses for the effect of important food sources of fructose-containing sugars and IHCL (SMD) in substitution trials .....                                                                             | 73 |
| Supplementary Figure S49: Risk of bias (using The Cochrane Collaboration Tool) subgroup analysis for the effect of important food sources of fructose-containing sugars and IHCL (SMD) in substitution trials .....                                      | 74 |
| Supplementary Figure S50 (part 1 of 3): Subgroup analyses for the effect of important food sources of fructose-containing sugars and IHCL (SMD) in addition trials .....                                                                                 | 75 |
| Supplementary Figure S50 (part 2 of 3): A priori subgroup analyses for the effect of important food sources of fructose-containing sugars and IHCL (SMD) in addition trials.....                                                                         | 75 |
| Supplementary Figure S50 (part 3 of 3): A priori subgroup analyses for the effect of important food sources of fructose-containing sugars and IHCL (SMD) in addition trials.....                                                                         | 77 |
| Supplementary Figure S51: Risk of bias (using The Cochrane Collaboration Tool) subgroup analysis for the effect of important food sources of fructose-containing sugars and IHCL (SMD) in addition trials.....                                           | 78 |
| Supplementary Figure S52 (part 1 of 3): Subgroup analyses for the effect of important food sources of fructose-containing sugars and ALT (U/L) in substitution trials .....                                                                              | 79 |

|                                                                                                                                                                                                                    |     |
|--------------------------------------------------------------------------------------------------------------------------------------------------------------------------------------------------------------------|-----|
| Supplementary Figure S52 (part 2 of 3): Subgroup analyses for the effect of important food sources of fructose-containing sugars and ALT (U/L) in substitution trials .....                                        | 80  |
| Supplementary Figure S52 (part 3 of 3): A priori subgroup analyses for the effect of important food sources of fructose-containing sugars and ALT (U/L) in substitution trials .....                               | 81  |
| Supplementary Figure S53: Risk of bias (using The Cochrane Collaboration Tool) subgroup analysis for the effect of important food sources of fructose-containing sugars and ALT (U/L) in substitution trials ..... | 82  |
| Supplementary Figure S54 (part 1 of 3): A priori subgroup analyses for the effect of important food sources of fructose-containing sugars and ALT (U/L) in addition trials.....                                    | 83  |
| Supplementary Figure S54 (part 2 of 3): A priori subgroup analyses for the effect of important food sources of fructose-containing sugars and ALT (U/L) in addition trials.....                                    | 85  |
| Supplementary Figure S54 (part 3 of 3): A priori subgroup analyses for the effect of important food sources of fructose-containing sugars and ALT (U/L) in addition trials.....                                    | 86  |
| Supplementary Figure S55: Risk of bias (using The Cochrane Collaboration Tool) subgroup analysis for the effect of important food sources of fructose-containing sugars and ALT (U/L) in addition trials .....     | 87  |
| Supplementary Figure S56 (part 1 of 3): A priori subgroup analyses for the effect of important food sources of fructose-containing sugars and ALT (U/L) in addition SSB trials .....                               | 89  |
| Supplementary Figure S56 (part 2 of 3): A priori subgroup analyses for the effect of important food sources of fructose-containing sugars and ALT (U/L) in addition SSB trials .....                               | 90  |
| Supplementary Figure S56 (part 3 of 3): A priori subgroup analyses for the effect of important food sources of fructose-containing sugars and ALT (U/L) in addition SSB trials .....                               | 91  |
| Supplementary Figure S57: Risk of bias (using The Cochrane Collaboration Tool) subgroup analysis for the effect of important food sources of fructose-containing sugars and ALT (U/L) in addition SSB trials ..... | 92  |
| Supplementary Figure S58 (part 1 of 3): A priori subgroup analyses for the effect of important food sources of fructose-containing sugars and AST (U/L) in substitution trials .....                               | 93  |
| Supplementary Figure S58 (part 2 of 3): A priori subgroup analyses for the effect of important food sources of fructose-containing sugars and AST (U/L) in substitution trials .....                               | 94  |
| Supplementary Figure S58 (part 3 of 3): A priori subgroup analyses for the effect of important food sources of fructose-containing sugars and AST (U/L) in substitution trials .....                               | 95  |
| Supplementary Figure S59: Risk of bias (using The Cochrane Collaboration Tool) subgroup analysis for the effect of important food sources of fructose-containing sugars and AST (U/L) in substitution trials ..... | 96  |
| Supplementary Figure S60 (part 1 of 3): A priori subgroup analyses for the effect of important food sources of fructose-containing sugars and AST (U/L) in addition trials.....                                    | 97  |
| Supplementary Figure S60 (part 2 of 3): A priori subgroup analyses for the effect of important food sources of fructose-containing sugars and AST (U/L) in addition trials.....                                    | 98  |
| Supplementary Figure S60 (part 3 of 3): A priori subgroup analyses for the effect of important food sources of fructose-containing sugars and AST (U/L) in addition trials.....                                    | 99  |
| Supplementary Figure S61: Risk of bias (using The Cochrane Collaboration Tool) subgroup analysis for the effect of important food sources of fructose-containing sugars and AST (U/L) in addition trials.....      | 100 |
| Supplementary Figure S62: Continuous meta-regression analysis for the effect of important food sources of fructose-containing sugars and IHCL (SMD) in substitution trials .....                                   | 101 |
| Supplementary Figure S63: Continuous meta-regression analysis for the effect of important food sources of fructose-containing sugars and IHCL (SMD) in addition trials.....                                        | 101 |
| Supplementary Figure S64: Continuous meta-regression analysis for the effect of important food sources of fructose-containing sugars and ALT (U/L) in substitution trials .....                                    | 102 |
| Supplementary Figure S65: Continuous meta-regression analysis for the effect of important food sources of fructose-containing sugars and ALT (U/L) in addition trials.....                                         | 102 |



|                                                                                                                                                                                                                                      |                                     |
|--------------------------------------------------------------------------------------------------------------------------------------------------------------------------------------------------------------------------------------|-------------------------------------|
| Supplementary Figure S66: Continuous meta-regression analysis for the effect of important food sources of fructose-containing sugars and ALT (U/L) in addition SSB trials .....                                                      | 103                                 |
| Supplementary Figure S67: Continuous meta-regression analysis for the effect of important food sources of fructose-containing sugars and AST (U/L) in substitution trials .....                                                      | 104                                 |
| Supplementary Figure S68: Continuous meta-regression analysis for the effect of important food sources of fructose-containing sugars and AST (U/L) in addition trials.....                                                           | 104                                 |
| Supplementary Figure S69: Linear and non-linear meta-regression analyses for the effect of important food sources of fructose-containing sugars dose and IHCL (SMD) in substitution trials.....                                      | 105                                 |
| Supplementary Figure S70: Linear and non-linear meta-regression analyses for the effect of important food sources of SSB sugars dose and IHCL (SMD) in substitution trials .....                                                     | <b>Error! Bookmark not defined.</b> |
| Supplementary Figure S71: Linear and non-linear meta-regression analyses for the effect of important food sources of fructose-containing sugars dose and IHCL (SMD) in addition trials .....                                         | 106                                 |
| Supplementary Figure S72: Linear and non-linear meta-regression analyses for the effect of important food sources of fructose-containing sugars dose and ALT (U/L) in substitution trials .....                                      | 107                                 |
| Supplementary Figure S73: Linear and non-linear meta-regression analyses for the effect of important food sources of fructose-containing sugars dose and ALT (U/L) in addition trials .....                                          | 108                                 |
| Supplementary Figure S74: Linear and non-linear meta-regression analyses for the effect of SSB sugars dose and ALT (U/L) in addition trials .....                                                                                    | 109                                 |
| Supplementary Figure S75: Linear and non-linear meta-regression analyses for the effect of important food sources of fructose-containing sugars dose and ALT (U/L) in subtraction trials .....                                       | 111                                 |
| Supplementary Figure S76: Linear and non-linear meta-regression analyses for the effect of important food sources of fructose-containing sugars dose and AST (U/L) in substitution trials.....                                       | 112                                 |
| Supplementary Figure S77: Linear and non-linear meta-regression analyses for the effect of important food sources of fructose-containing sugars dose and AST (U/L) in addition trials .....                                          | 113                                 |
| Supplementary Figure S77: Linear and non-linear meta-regression analyses for the effect of important food sources of fructose-containing sugars dose and AST (U/L) in addition SSB trials .....                                      | 114                                 |
| Supplementary Figure S78: Linear and non-linear meta-regression analyses for the effect of important food sources of fructose-containing sugars dose and AST (U/L) in subtraction trials.....                                        | 115                                 |
| Supplementary Figure S79: Non-linear dose-response analysis using public thresholds of 5%, 10%, and 25% of energy for the effect of important food sources of fructose-containing sugars and IHCL (SMD) in substitution trials ..... | 116                                 |
| Supplementary Figure S80: Non-linear dose-response analysis using public threshold of 25% energy for the effect of important food sources of fructose-containing sugars and IHCL (SMD) in addition trials .....                      | 118                                 |
| Supplementary Figure S81: Non-linear dose-response analysis using public thresholds of 5%, 10%, and 25% of energy for the effect of important food sources of fructose-containing sugars and ALT (U/L) in substitution trials.....   | 119                                 |
| Supplementary Figure S82: Non-linear dose-response analysis using public thresholds of 5%, 10%, and 25% of energy for the effect of important food sources of fructose-containing sugars and ALT (U/L) in addition trials .....      | 121                                 |
| Supplementary Figure S83: Non-linear dose-response analysis using public thresholds of 10% and 25% of energy for the effect of SSBs on ALT (U/L) in addition trials .....                                                            | 123                                 |
| Supplementary Figure S84: Non-linear dose-response analysis using public thresholds of 5%, 10%, and 25% of energy for the effect of important food sources of fructose-containing sugars and AST (U/L) in substitution trials .....  | 125                                 |
| Supplementary Figure S85: Non-linear dose-response analysis using public thresholds of 5%, 10%, and 25% of energy for the effect of important food sources of fructose-containing sugars and AST (U/L) in addition trials .....      | 127                                 |
| Supplementary Figure S86: Non-linear dose-response analysis using public thresholds of 5%, 10%, and 25% of energy for the effect of important food sources of fructose-containing sugars and AST (U/L) in addition SSB trials .....  | 129                                 |

|                                                                                                                                                                            |     |
|----------------------------------------------------------------------------------------------------------------------------------------------------------------------------|-----|
| Supplementary Figure S87: Publication bias funnel plots for the effect of important food sources of fructose-containing sugars and IHCL (SMD) in substitution trials ..... | 130 |
| Supplementary Figure S88: Publication bias funnel plots for the effect of important food sources of fructose-containing sugars and IHCL (SMD) in addition trials* .....    | 131 |
| Supplementary Figure S89: Publication bias funnel plots for the effect of important food sources of fructose-containing sugars and ALT (U/L) in substitution trials .....  | 132 |
| Supplementary Figure S90: Publication bias funnel plots for the effect of important food sources of fructose-containing sugars and ALT (U/L) in addition trials.....       | 133 |
| Supplementary Figure S91: Publication bias funnel plots for the effect of important food sources of fructose-containing sugars and ALT (U/L) in addition SSB trials.....   | 134 |
| Supplementary Figure S92: Publication bias funnel plots for the effect of important food sources of fructose-containing sugars and AST (U/L) in substitution trials .....  | 135 |
| Supplementary Figure S93: Publication bias funnel plots for the effect of important food sources of fructose-containing sugars and AST (U/L) in addition trials.....       | 136 |
| Supplementary Figure S94: Trim and Fill funnel plot for the effect of important food sources of fructose-containing sugars IHCL (SMD) in substitution trials.....          | 137 |
| Supplementary Figure S95: Trim and Fill funnel plot for the effect of important food sources of fructose-containing sugars IHCL (SMD) in addition trials .....             | 138 |
| Supplementary Figure S96: Trim and Fill funnel plot for the effect of important food sources of fructose-containing sugars ALT (U/L) in substitution trials.....           | 139 |
| Supplementary Figure S97: Trim and Fill funnel plot for the effect of important food sources of fructose-containing sugars AST (U/L) in substitution trials.....           | 140 |
| Supplementary References .....                                                                                                                                             | 141 |

## Supplementary Tables

**Supplementary Table S1: PRISMA Checklist**

| Section and Topic             | Item # | Checklist item                                                                                                                                                                                                                                                                                       | Location where item is reported |
|-------------------------------|--------|------------------------------------------------------------------------------------------------------------------------------------------------------------------------------------------------------------------------------------------------------------------------------------------------------|---------------------------------|
| <b>TITLE</b>                  |        |                                                                                                                                                                                                                                                                                                      |                                 |
| Title                         | 1      | Identify the report as a systematic review.                                                                                                                                                                                                                                                          | Page 1                          |
| <b>ABSTRACT</b>               |        |                                                                                                                                                                                                                                                                                                      |                                 |
| Abstract                      | 2      | See the PRISMA 2020 for Abstracts checklist.                                                                                                                                                                                                                                                         | Pages 1,2                       |
| <b>INTRODUCTION</b>           |        |                                                                                                                                                                                                                                                                                                      |                                 |
| Rationale                     | 3      | Describe the rationale for the review in the context of existing knowledge.                                                                                                                                                                                                                          | Page 2                          |
| Objectives                    | 4      | Provide an explicit statement of the objective(s) or question(s) the review addresses.                                                                                                                                                                                                               | Pages 2                         |
| <b>METHODS</b>                |        |                                                                                                                                                                                                                                                                                                      |                                 |
| Eligibility criteria          | 5      | Specify the inclusion and exclusion criteria for the review and how studies were grouped for the syntheses.                                                                                                                                                                                          | Page 3, Table S3                |
| Information sources           | 6      | Specify all databases, registers, websites, organisations, reference lists and other sources searched or consulted to identify studies. Specify the date when each source was last searched or consulted.                                                                                            | Page 3                          |
| Search strategy               | 7      | Present the full search strategies for all databases, registers and websites, including any filters and limits used.                                                                                                                                                                                 | Page 3, Table S1                |
| Selection process             | 8      | Specify the methods used to decide whether a study met the inclusion criteria of the review, including how many reviewers screened each record and each report retrieved, whether they worked independently, and if applicable, details of automation tools used in the process.                     | Pages 3-5                       |
| Data collection process       | 9      | Specify the methods used to collect data from reports, including how many reviewers collected data from each report, whether they worked independently, any processes for obtaining or confirming data from study investigators, and if applicable, details of automation tools used in the process. | Pages 3,4                       |
| Data items                    | 10a    | List and define all outcomes for which data were sought. Specify whether all results that were compatible with each outcome domain in each study were sought (e.g. for all measures, time points, analyses), and if not, the methods used to decide which results to collect.                        | Page 4                          |
|                               | 10b    | List and define all other variables for which data were sought (e.g. participant and intervention characteristics, funding sources). Describe any assumptions made about any missing or unclear information.                                                                                         | Page 4                          |
| Study risk of bias assessment | 11     | Specify the methods used to assess risk of bias in the included studies, including details of the tool(s) used, how many reviewers assessed each study and whether they worked independently, and if applicable, details of automation tools used in the process.                                    | Page 4                          |
| Effect measures               | 12     | Specify for each outcome the effect measure(s) (e.g. risk ratio, mean difference) used in the synthesis or presentation of results.                                                                                                                                                                  | Pages 4,5                       |
| Synthesis methods             | 13a    | Describe the processes used to decide which studies were eligible for each synthesis (e.g. tabulating the study intervention characteristics and comparing against the planned groups for each synthesis (item #5)).                                                                                 | Page 4, Table S3                |
|                               | 13b    | Describe any methods required to prepare the data for presentation or synthesis, such as handling of missing summary statistics, or data conversions.                                                                                                                                                | Pages 4,5                       |
|                               | 13c    | Describe any methods used to tabulate or visually display results of individual studies and syntheses.                                                                                                                                                                                               | Pages 4,5                       |
|                               | 13d    | Describe any methods used to synthesize results and provide a rationale for the choice(s). If meta-analysis was performed, describe the model(s), method(s) to identify the presence and extent of statistical heterogeneity, and software package(s) used.                                          | Pages 4,5                       |
|                               | 13e    | Describe any methods used to explore possible causes of heterogeneity among study results (e.g. subgroup analysis, meta-regression).                                                                                                                                                                 | Pages 4,5                       |

|                                                |     |                                                                                                                                                                                                                                                                                      |                                     |
|------------------------------------------------|-----|--------------------------------------------------------------------------------------------------------------------------------------------------------------------------------------------------------------------------------------------------------------------------------------|-------------------------------------|
|                                                | 13f | Describe any sensitivity analyses conducted to assess robustness of the synthesized results.                                                                                                                                                                                         | Pages 4,5                           |
| Reporting bias assessment                      | 14  | Describe any methods used to assess risk of bias due to missing results in a synthesis (arising from reporting biases).                                                                                                                                                              | Page 5                              |
| Certainty assessment                           | 15  | Describe any methods used to assess certainty (or confidence) in the body of evidence for an outcome.                                                                                                                                                                                | Page 5                              |
| <b>RESULTS</b>                                 |     |                                                                                                                                                                                                                                                                                      |                                     |
| Study selection                                | 16a | Describe the results of the search and selection process, from the number of records identified in the search to the number of studies included in the review, ideally using a flow diagram.                                                                                         | Page 6, Figure 1                    |
|                                                | 16b | Cite studies that might appear to meet the inclusion criteria, but which were excluded, and explain why they were excluded.                                                                                                                                                          | Figure 1                            |
| Study characteristics                          | 17  | Cite each included study and present its characteristics.                                                                                                                                                                                                                            | Page 6, Table 1, S5                 |
| Risk of bias in studies                        | 18  | Present assessments of risk of bias for each included study.                                                                                                                                                                                                                         | Page 9, Figures S1-11               |
| Results of individual studies                  | 19  | For all outcomes, present, for each study: (a) summary statistics for each group (where appropriate) and (b) an effect estimate and its precision (e.g. confidence/credible interval), ideally using structured tables or plots.                                                     | Pages 9-18, Figures 2-4 and S12-22  |
| Results of syntheses                           | 20a | For each synthesis, briefly summarise the characteristics and risk of bias among contributing studies.                                                                                                                                                                               | Figures S1-11                       |
|                                                | 20b | Present results of all statistical syntheses conducted. If meta-analysis was done, present for each the summary estimate and its precision (e.g. confidence/credible interval) and measures of statistical heterogeneity. If comparing groups, describe the direction of the effect. | Pages 9-19, Figures 2-4 and S12-97  |
|                                                | 20c | Present results of all investigations of possible causes of heterogeneity among study results.                                                                                                                                                                                       | Page 18, Figures S23-47             |
|                                                | 20d | Present results of all sensitivity analyses conducted to assess the robustness of the synthesized results.                                                                                                                                                                           | Pages 18, Figures S23-47            |
| Reporting biases                               | 21  | Present assessments of risk of bias due to missing results (arising from reporting biases) for each synthesis assessed.                                                                                                                                                              | Page 19                             |
| Certainty of evidence                          | 22  | Present assessments of certainty (or confidence) in the body of evidence for each outcome assessed.                                                                                                                                                                                  | Page 19, Figures 2-4, Tables S7-8   |
| <b>DISCUSSION</b>                              |     |                                                                                                                                                                                                                                                                                      |                                     |
| Discussion                                     | 23a | Provide a general interpretation of the results in the context of other evidence.                                                                                                                                                                                                    | Page 20                             |
|                                                | 23b | Discuss any limitations of the evidence included in the review.                                                                                                                                                                                                                      | Pages 20,21                         |
|                                                | 23c | Discuss any limitations of the review processes used.                                                                                                                                                                                                                                | Pages 20,21                         |
|                                                | 23d | Discuss implications of the results for practice, policy, and future research.                                                                                                                                                                                                       | Page 21                             |
| <b>OTHER INFORMATION</b>                       |     |                                                                                                                                                                                                                                                                                      |                                     |
| Registration and protocol                      | 24a | Provide registration information for the review, including register name and registration number, or state that the review was not registered.                                                                                                                                       | Page 3                              |
|                                                | 24b | Indicate where the review protocol can be accessed, or state that a protocol was not prepared.                                                                                                                                                                                       | Page 3                              |
|                                                | 24c | Describe and explain any amendments to information provided at registration or in the protocol.                                                                                                                                                                                      | N/A                                 |
| Support                                        | 25  | Describe sources of financial or non-financial support for the review, and the role of the funders or sponsors in the review.                                                                                                                                                        | Pages 22-25                         |
| Competing interests                            | 26  | Declare any competing interests of review authors.                                                                                                                                                                                                                                   | Pages 22-25                         |
| Availability of data, code and other materials | 27  | Report which of the following are publicly available and where they can be found: template data collection forms; data extracted from included studies; data used for all analyses; analytic code; any other materials used in the review.                                           | Tables S2-5, Figures 2-4 and S12-22 |

N/A=not applicable.  
Table obtained from Page et al. 2021 (1).

**Supplementary Table S2: Search strategy for controlled trials assessing the effect of important food sources of fructose-containing sugars and NAFLD outcomes**

| Database and search terms                                                                                                                                                                                                                                                                                                                                                                                                                                                                                                                                                                                                                                                                                                                                                                                                                                                                                                                                                                                                                                                                                                                                                                                                                                                                                                                                                                                                                                                                       |                                                                                                                                                                                                                                                                                                                                                                                                                                                                                                                                                                                                                                                                                                                                                                                                                                                                                                                                                                                                                                                                                                                                                                                                                                                                                                                                                                                                                                                                                                                          |                                                                                                                                                                                                                                                                                                                                                                                                                                                                                                                                                                                                                                                                                                                                                                                                                                                                                                                                                                                                                                                                                                                                                                                                                                                                                                                                                                 |
|-------------------------------------------------------------------------------------------------------------------------------------------------------------------------------------------------------------------------------------------------------------------------------------------------------------------------------------------------------------------------------------------------------------------------------------------------------------------------------------------------------------------------------------------------------------------------------------------------------------------------------------------------------------------------------------------------------------------------------------------------------------------------------------------------------------------------------------------------------------------------------------------------------------------------------------------------------------------------------------------------------------------------------------------------------------------------------------------------------------------------------------------------------------------------------------------------------------------------------------------------------------------------------------------------------------------------------------------------------------------------------------------------------------------------------------------------------------------------------------------------|--------------------------------------------------------------------------------------------------------------------------------------------------------------------------------------------------------------------------------------------------------------------------------------------------------------------------------------------------------------------------------------------------------------------------------------------------------------------------------------------------------------------------------------------------------------------------------------------------------------------------------------------------------------------------------------------------------------------------------------------------------------------------------------------------------------------------------------------------------------------------------------------------------------------------------------------------------------------------------------------------------------------------------------------------------------------------------------------------------------------------------------------------------------------------------------------------------------------------------------------------------------------------------------------------------------------------------------------------------------------------------------------------------------------------------------------------------------------------------------------------------------------------|-----------------------------------------------------------------------------------------------------------------------------------------------------------------------------------------------------------------------------------------------------------------------------------------------------------------------------------------------------------------------------------------------------------------------------------------------------------------------------------------------------------------------------------------------------------------------------------------------------------------------------------------------------------------------------------------------------------------------------------------------------------------------------------------------------------------------------------------------------------------------------------------------------------------------------------------------------------------------------------------------------------------------------------------------------------------------------------------------------------------------------------------------------------------------------------------------------------------------------------------------------------------------------------------------------------------------------------------------------------------|
| MEDLINE                                                                                                                                                                                                                                                                                                                                                                                                                                                                                                                                                                                                                                                                                                                                                                                                                                                                                                                                                                                                                                                                                                                                                                                                                                                                                                                                                                                                                                                                                         | EMBASE                                                                                                                                                                                                                                                                                                                                                                                                                                                                                                                                                                                                                                                                                                                                                                                                                                                                                                                                                                                                                                                                                                                                                                                                                                                                                                                                                                                                                                                                                                                   | The Cochrane Library of Controlled Studies                                                                                                                                                                                                                                                                                                                                                                                                                                                                                                                                                                                                                                                                                                                                                                                                                                                                                                                                                                                                                                                                                                                                                                                                                                                                                                                      |
| 1. exp fructose/<br>2. fructose.mp.<br>3. exp dietary sucrose/<br>4. sucrose.mp.<br>5. sweetened*.mp.<br>6. sugar*.mp.<br>7. SSB.mp.<br>8. soft drink*.mp.<br>9. cola*.mp.<br>10. exp honey/<br>11. honey.mp.<br>12. fruit.mp.<br>13. exp fruit/<br>14. exp sucrose/<br>15. exp soft drink/<br>16. exp carbonated beverage/<br>17. carbonated beverage*.mp.<br>18. exp energy drink/<br>19. energy drink*.mp.<br>20. HFCS.mp.<br>21. sugar*sweetened beverage*.mp.<br>22. exp fatty liver/<br>23. fatty liver.mp.<br>24. exp NAFLD/<br>25. NAFLD.mp.<br>26. NAFL.mp.<br>27. NASH.mp.<br>28. liver stenosis.mp.<br>29. liver cirrhosis.mp.<br>30. HCC.mp.<br>31. exp hepatocellular carcinoma/<br>32. hepatocellular carcinoma.mp.<br>33. liver biopsy.mp.<br>34. liver histology.mp.<br>35. liver inflammation.mp.<br>36. exp liver fibrosis/<br>37. liver fibrosis.mp.<br>38. exp magnetic resonance imaging/<br>39. magnetic resonance imaging.mp.<br>40. MRI.mp.<br>41. MRS.mp.<br>42. NMRI.mp.<br>43. intrahepatocellular lipid.mp.<br>44. alanine aminotransferase*.mp.<br>45. ALT.mp.<br>46. AST.mp.<br>47. aspartate aminotransferase.mp.<br>48. exp GGT/<br>49. GGT.mp.<br>50. alkaline phosphatase.mp.<br>51. ALP.mp.<br>52. adipocytes.mp.<br>53. liver enzyme*.mp.<br>54. exp transaminases/<br>55. transaminases.mp.<br>56. proton imaging.mp.<br>57. clinical trial.mp.<br>58. clinical trial.pt.<br>59. random:.mp.<br>60. tu:.xs.<br>61. or/1-21<br>62. or/22-56<br>63. or/57-60 | 1. exp fructose/<br>2. fructose.mp.<br>3. exp sucrose/<br>4. sucrose.mp.<br>5. sugar*.mp.<br>6. SSB.mp.<br>7. exp honey/<br>8. honey.mp.<br>9. fruit.mp.<br>10. exp fruit/<br>11. exp soft drink/<br>12. soft drink*.mp.<br>13. exp carbonated beverage/<br>14. carbonated beverage*.mp.<br>15. exp energy drink/<br>16. energy drink*.mp.<br>17. sweetened.mp.<br>18. cola.mp.<br>19. HFCS.mp.<br>20. sugar*sweetened*beverage*.mp.<br>21. exp fatty liver/<br>22. fatty liver.mp.<br>23. NAFLD.mp.<br>24. NAFL.mp.<br>25. NASH.mp.<br>26. liver stenosis.mp.<br>27. liver cirrhosis.mp.<br>28. HCC.mp.<br>29. exp hepatocellular carcinoma/<br>30. hepatocellular carcinoma.mp.<br>31. liver biopsy.mp.<br>32. liver histology.mp.<br>33. liver inflammation.mp.<br>34. exp liver fibrosis/<br>35. liver fibrosis.mp.<br>36. exp magnetic resonance imaging/<br>37. magnetic resonance imaging.mp.<br>38. MRI.mp.<br>39. MRS.mp.<br>40. NMRI.mp.<br>41. intrahepatocellular lipid.mp.<br>42. alanine aminotransferase*.mp.<br>43. ALT.mp.<br>44. AST.mp.<br>45. aspartate aminotransferase.mp.<br>46. alkaline phosphatase.mp.<br>47. ALP.mp.<br>48. adipocytes.mp.<br>49. liver enzyme*.mp.<br>50. exp transaminases/<br>51. transaminases.mp.<br>52. proton imaging.mp.<br>53. random:.tw.<br>54. clinical trial:.mp.<br>55. exp health care quality/<br>56. or/1-20<br>57. or/21-52<br>58. or/53-55<br>59. 56 and 57<br>60. limit 59 to animals<br>61. 59 not 60<br>62. limit 61 to animal studies<br>63. 61 not 62 | 1. exp fructose/<br>2. fructose.mp.<br>3. exp sucrose/<br>4. sucrose.mp.<br>5. sugar*.mp.<br>6. cola.mp.<br>7. SSB.mp.<br>8. soft drink.mp.<br>9. exp honey/<br>10. honey.mp.<br>11. fruit.mp.<br>12. sweetened.mp.<br>13. exp carbonated beverages/<br>14. carbonated beverage*.mp.<br>15. exp energy drinks/<br>16. energy drink*.mp.<br>17. exp fruit/<br>18. HFCS.mp.<br>19. exp energy drink*.mp.<br>20. sugar*sweetened*beverage*.mp.<br>21. exp fatty liver/<br>22. fatty liver.mp.<br>23. NAFLD.mp.<br>24. NAFL.mp.<br>25. NASH.mp.<br>26. liver cirrhosis.mp.<br>27. HCC.mp.<br>28. exp carcinoma, hepatocellular/<br>29. hepatocellular carcinoma.mp.<br>30. liver biopsy.mp.<br>31. liver histology.mp.<br>32. liver inflammation.mp.<br>33. exp liver cirrhosis/<br>34. liver fibrosis.mp.<br>35. exp magnetic resonance imaging/<br>36. magnetic resonance imaging.mp.<br>37. MRI.mp.<br>38. MRS.mp.<br>39. NMRI.mp.<br>40. intrahepatocellular lipid.mp.<br>41. alanine aminotransferase*.mp.<br>42. ALT.mp.<br>43. AST.mp.<br>44. aspartate aminotransferase.mp.<br>45. exp gamma-glutamyltransferase/<br>46. GGT.mp.<br>47. alkaline phosphatase.mp.<br>48. ALP.mp.<br>49. adipocytes.mp.<br>50. liver enzyme*.mp.<br>51. exp transaminases/<br>52. transaminases.mp.<br>53. proton imaging.mp.<br>54. or/1-19<br>55. or/20-53<br>56. 54 and 55 |

|                                                                            |               |  |
|----------------------------------------------------------------------------|---------------|--|
| 64. 61 and 62<br>65. limit 64 to animals<br>66. 64 not 65<br>67. 63 and 66 | 64. 58 and 63 |  |
|----------------------------------------------------------------------------|---------------|--|

ALT=alanine aminotransferase; ALP=alkaline phosphatase; AST=aspartate aminotransferase; GGT=gamma-glutamyl transferase; HCC=hepatocellular carcinoma; HFCS=high-fructose corn syrup; MRI=magnetic resonance imaging; MRS=magnetic resonance spectroscopy; NAFL=non-alcoholic fatty liver; NAFLD=non-alcoholic fatty liver disease; NASH=non-alcoholic steatohepatitis; NMRI=nuclear magnetic resonance imaging; SSB=sugar sweetened beverage.

**Supplementary Table S3: PICO framework of the search strategy**

| <b>PICO framework<sup>1</sup> defined in the present systematic review and meta-analysis</b> |                                            |                                                                                            |                                                                  |             |                                  |
|----------------------------------------------------------------------------------------------|--------------------------------------------|--------------------------------------------------------------------------------------------|------------------------------------------------------------------|-------------|----------------------------------|
| <b>Participants</b>                                                                          | <b>Interventions</b>                       | <b>Comparators</b>                                                                         | <b>Outcomes</b>                                                  | <b>Time</b> | <b>Study design</b>              |
| Individuals of all ages and health backgrounds                                               | Food sources of fructose-containing sugars | Diets and foods free or lower (minimum 5g sugar difference) in fructose-containing sugars. | IHCL, ALT, and AST, mean difference and 95% confidence intervals | ≥7 days     | Controlled trials done in humans |

ALT=alanine aminotransferase; AST=aspartate aminotransferase; IHCL=intrahepatocellular lipid;

PICOTS=participants, interventions, comparators, outcomes, time and study design.



**Supplementary Table S4: Food source of fructose-containing sugars definitions**

| <b>Food source of fructose-containing sugars</b> | <b>Definition</b>                                                                                                                                                                                                                                                    |
|--------------------------------------------------|----------------------------------------------------------------------------------------------------------------------------------------------------------------------------------------------------------------------------------------------------------------------|
| SSB                                              | Carbonated or non-carbonated beverages where all or the majority of sugars are added sugars. This also includes interventions where sugars were provided to participants as crystalline packages and where they are instructed to add or incorporate into beverages. |
| Sweetened dairy                                  | Animal dairy products sweetened with added sugars and where the control includes non-dairy products. These would contain both added and naturally occurring sugars.                                                                                                  |
| Sweetened dairy alternatives (soy)               | Soy-based dairy products sweetened with added sugars and where the control includes non-soy-based dairy products.                                                                                                                                                    |
| Sweetened dairy alternative (other)              | Other plant-based dairy products sweetened with added sugars and where the control includes non-plant-based dairy products.                                                                                                                                          |
| Fruit drink                                      | Fruit drinks which are derived from fruit juices or fruit flavouring with added sugars. These must contain added and may also contain naturally occurring sugars.                                                                                                    |
| 100% Fruit juice                                 | Fruit juice which is derived 100% from fruits with no added sugar. The one exception was cranberry juice, in which a small amount of added sugars was added for palatability.                                                                                        |
| Fruit                                            | Includes whole fruit, freeze-dried powdered fruit, smoothies in which the only difference between intervention groups is the fruit present. The dose of the sugars under investigation is naturally occurring coming from fruit.                                     |
| Dried fruit                                      | Includes unsweetened and sweetened dried fruit. Sugars can be naturally occurring, or both naturally occurring and added.                                                                                                                                            |
| Mixed fruit forms                                | Interventions include two or more of the food sources of fruit sugars (i.e., fruit, dried fruit, 100% fruit juice). Sugars are naturally occurring coming from fruit.                                                                                                |
| Sweetened cereal grains and bars                 | Includes sweetened dried cereal, nut bars and fruit and nut bars. Sugars are added.                                                                                                                                                                                  |
| Sweets and desserts                              | Includes cookies, cakes, muffins, confectionaries, fondant, etc. Sugars are added.                                                                                                                                                                                   |
| Added nutritive (caloric) sweetener              | Sugars provided to participants as crystalline packages or syrup or honey, where they are instructed to add or incorporate it to various foods. Sugars are added regulatory designations.                                                                            |
| Mixed sources (with SSBs)                        | Interventions where fructose-containing sugars were consumed in the form of SSBs in addition to other food sources. Examples include whole dietary interventions. Sugars can be added, or both naturally occurring and added.                                        |
| Mixed sources (without SSBs)                     | Interventions include two or more of the above food sources of fructose-containing sugars with the exception of SSBs. Sugars can be added, or both naturally occurring and added.                                                                                    |

SSB=sugar-sweetened beverage.

**Supplementary Table S5: Trial characteristics**

| Study, year                                 | Participants (M, F) | Setting         | Age, years* | BW, kg*      | Baseline                  |                |             |             | Design | Feeding Control <sup>a</sup> | Randomization | Dose, g/d (% E) <sup>b</sup> | Interventions    | Food matrix                                              | Diet <sup>c</sup> | Energy Balance <sup>d</sup> | Follow-up | Funding <sup>e</sup> |      |
|---------------------------------------------|---------------------|-----------------|-------------|--------------|---------------------------|----------------|-------------|-------------|--------|------------------------------|---------------|------------------------------|------------------|----------------------------------------------------------|-------------------|-----------------------------|-----------|----------------------|------|
|                                             |                     |                 |             |              | BMI, kg/m <sup>2</sup> ** | IHCL (units)*  | ALT (U/L)*  | AST (U/L)*  |        |                              |               |                              |                  |                                                          |                   |                             |           |                      |      |
| Substitution Trials (Isocaloric Comparison) |                     |                 |             |              |                           |                |             |             |        |                              |               |                              |                  |                                                          |                   |                             |           |                      |      |
| SSB                                         |                     |                 |             |              |                           |                |             |             |        |                              |               |                              |                  |                                                          |                   |                             |           |                      |      |
| Aeberli et al. 2011                         | 29 NW (29M, 0F)     | OP, Switzerland | 26.3 (6.6)  | 73.7 (8.8)   | 22.4 (1.9)                | -              | 23.0 (7.0)  | 26.0 (6.0)  | C      | Supp                         | Yes           |                              |                  |                                                          |                   |                             | Positive  | 3 wk                 | A, I |
| Intervention                                |                     |                 |             |              |                           |                |             |             |        |                              |               | 40 (~7)                      | Fructose         | 600mL/d fructoseSSB                                      | ~51:35:14         |                             |           |                      |      |
| Intervention                                |                     |                 |             |              |                           |                |             |             |        |                              |               | 80 (~13)                     | Fructose         | 600mL/d fructoseSSB                                      | ~55:32:14         |                             |           |                      |      |
| Intervention                                |                     |                 |             |              |                           |                |             |             |        |                              |               | 80 (~13)                     | Sucrose          | 600mL/d sucroseSSB                                       | ~55:32:13         |                             |           |                      |      |
| Control                                     |                     |                 |             |              |                           |                |             |             |        |                              |               |                              | Glucose          | 600mL/d glucoseSSB (40g)                                 | ~53:32:13         |                             |           |                      |      |
| Control                                     |                     |                 |             |              |                           |                |             |             |        |                              |               |                              | Glucose          | 600mL/d glucoseSSB (80g)                                 | ~57:31:13         |                             |           |                      |      |
| Alemán et al. 2021                          | 10 OB (6M, 4F)      | IP, USA         | 57.6 (6.2)  | 101.8 (14.8) | 35.9 (3.3)                | -              | 21 (10)     | 19 (4)      | C      | Met                          | Yes           | 75 (20.1)                    | Fructose         | Fructose drink (75g/d)                                   | 56:32:14          | Neutral                     | 2 wk      | A                    |      |
| Intervention                                |                     |                 |             |              |                           | -              | 25 (14)     | 20 (7)      |        |                              |               |                              | Glucose          | Glucose drink (75g/d)                                    |                   |                             |           |                      |      |
| Control                                     |                     |                 |             |              |                           |                |             |             |        |                              |               |                              |                  |                                                          |                   |                             |           |                      |      |
| Chiu et al. 2020                            | 30 OW/OB (30M, 0F)  | OP, USA         | 15.3 (1.5)  | 86.8 (15.7)  | 1.8 (0.5) <sup>f</sup>    | -              | -           | -           | C      | Supp                         | Yes           |                              |                  |                                                          |                   | 49:36:16                    | Neutral   | 3 wk                 | A, I |
| Intervention                                |                     |                 |             |              |                           |                |             |             |        |                              |               | 80 (22)                      | HFCS             | 24oz/d SSB                                               |                   |                             |           |                      |      |
| Control                                     |                     |                 |             |              |                           |                |             |             |        |                              |               |                              | Lactose          | 22oz/d energy-equivalent amount of 2% milk               |                   |                             |           |                      |      |
| Cox et al. 2012                             | 31 OW/OB (16M, 15F) | IP/OP, USA      | 52.5 (9.3)  | 29.3 (14.48) | 29.3 (14.5)               | -              | 14.5 (1.6)  | 17.3 (1.6)  | P      | Met/Supp                     | No            | 182 (25)                     | Fructose         | Fructose beverage                                        | ~55:30:15         | Positive                    | 10 wk     | A                    |      |
| Intervention                                | 16 OW (9M, 8F)      |                 |             |              |                           | -              | 20.6 (3.2)  | 22.3 (2.3)  |        |                              |               |                              | Glucose          | Glucose beverage                                         |                   |                             |           |                      |      |
| Control                                     | 15 OW (7M, 7F)      |                 |             |              |                           |                |             |             |        |                              |               |                              |                  |                                                          |                   |                             |           |                      |      |
| Jin et al. 2014                             | 21 OW (11M, 10F)    | OP, USA         | 13.5 (2.5)  |              |                           |                |             |             | P      | Supp                         | Yes           |                              |                  |                                                          |                   | NR                          | Neutral   | 4 wk                 | A    |
| Intervention                                | 9 OW (3M, 6F)       |                 | 13.0 (2.6)  | 82.3 (16.9)  | 2.3 (0.6) <sup>f</sup>    | 14.5 (1.79)%   | 33.0 (6.7)  | 32.4 (3.1)  |        |                              |               | 99 (~20)                     | Fructose         | FructoseSSB                                              |                   |                             |           |                      |      |
| Control                                     | 12 OW (8M, 4F)      |                 | 14.2 (2.5)  | 82.0 (14.8)  | 2.2 (0.3) <sup>f</sup>    | 14.0 (1.77)%   | 32.7 (5.2)  | 33.8 (2.1)  |        |                              |               |                              | Glucose          | GlucoseSSB                                               |                   |                             |           |                      |      |
| Johnston et al. 2013 (T1)                   | 32 OW (32M, 0F)     | OP, UK          | 34 (9.9)    | 95.3 (5.7)   |                           | 7.6 (5.3)%     | 28.9 (12.6) |             | P      | Met                          | Yes           |                              |                  |                                                          |                   | ~55:30:15                   | Neutral   | 2 wk                 | A    |
| Intervention                                | 15 OW (15M, 0F)     |                 | 35 (11)     | 96.8 (7.4)   | 30.0 (1.4)                | 7.2 (5.6)%     | 31.0 (15.0) | 24.0 (8.0)  |        |                              |               | ~221 (25)                    | Fructose         | 2000mL/d fructose dissolved in water                     |                   |                             |           |                      |      |
| Control                                     | 17 OW (17M, 0F)     |                 | 33 (9)      | 93.9 (8.7)   | 28.9 (1.7)                | 8.0 (5.2)%     | 27.0 (10.0) | 24.0 (5.0)  |        |                              |               |                              | Glucose          | 2000mL/d glucose dissolved in water                      |                   |                             |           |                      |      |
| Johnston et al. 2013 (T2)                   | 32 OW (32M, 0F)     | OP, UK          | 34 (9.9)    | 95.26 (5.7)  |                           | 7.6 (5.3)%     | 28.9 (12.6) |             | P      | Supp                         | Yes           |                              |                  |                                                          |                   | ~55:30:15                   | Positive  | 2 wk                 | A    |
| Intervention                                | 15 OW (15M, 0F)     |                 | 35 (11)     | 96.8 (7.4)   | 30.0 (1.4)                | 7.2 (5.6)%     | 31.0 (15.0) | 24.0 (8.0)  |        |                              |               | ~221 (25)                    | Fructose         | 2000mL/d SSB fructose dissolved in water                 |                   |                             |           |                      |      |
| Control                                     | 17 OW (17M, 0F)     |                 | 33 (9)      | 93.9 (8.7)   | 28.9 (1.7)                | 8.0 (5.2)%     | 27.0 (10.0) | 24.0 (5.0)  |        |                              |               |                              | Glucose          | 2000mL/d SSB glucose dissolved in water                  |                   |                             |           |                      |      |
| Maersk et al. 2012                          | 22 OW/OB (9M, 13F)  | OP, Denmark     | 38 (8)      | 96.2 (13.8)  | 31.6 (2.8)                |                |             |             | P      | Supp                         | Yes           |                              |                  |                                                          |                   | NR                          | Neutral   | 24 wk                | A, I |
| Intervention                                | 10 OW (6M, 4F)      |                 | 39 (6)      | 97.8 (12.5)  | 31.3 (2.9)                | 0.037 (0.04)AU | -           | -           |        |                              |               | ~106 (~21)                   | Sucrose          | Sucrose cola                                             |                   |                             |           |                      |      |
| Control                                     | 12 OW (3M, 9F)      |                 | 38 (9)      | 94.7 (15.3)  | 31.9 (2.8)                | 0.1 (0.1)AU    | -           | -           |        |                              |               |                              | Lactose          | Semi-skim milk                                           |                   |                             |           |                      |      |
| Ngo Sock et al. 2010                        | 11 NW (11M, 0F)     | OP, Switzerland | 24.6 (2.0)  | 71.9 (5.3)   | (19-25)                   | -              | -           | -           | C      | Met                          | Yes           |                              |                  |                                                          |                   | 55:30:15                    | Positive  | 1 wk                 | A    |
| Intervention                                |                     |                 |             |              |                           |                |             |             |        |                              |               | ~214 (35)                    | Fructose         | 20% fructose solution                                    |                   |                             |           |                      |      |
| Control                                     |                     |                 |             |              |                           |                |             |             |        |                              |               |                              | Glucose          | 20% glucose solution                                     |                   |                             |           |                      |      |
| Schwarz et al. 2015                         | 7 MW (7M, 0F)       | IP, USA         | 42 (8.5)    | -            | 24.4 (4.5)                | -              | -           | -           | C      | Met                          | No            |                              |                  |                                                          |                   | 50:35:15                    | Neutral   | 9 d                  | A    |
| Intervention                                |                     |                 |             |              |                           |                |             |             |        |                              |               | ~112.5 (22.5)                | Fructose         | FructoseSSB                                              |                   |                             |           |                      |      |
| Control                                     |                     |                 |             |              |                           |                |             |             |        |                              |               |                              | Starch           | Isocaloric exchange of starch-containing foods           |                   |                             |           |                      |      |
| Silbernagel et al. 2011                     | 20 MW (12M, 8F)     | OP, Germany     | 30.5 (8.9)  | 80.5 (4.2)   | 25.9 (2.3)                | 1.45 (0.85)%   | -           | -           | P      | Supp                         | Yes           |                              |                  |                                                          |                   | 50:35:15                    | Positive  | 4 wk                 | A    |
| Intervention                                | 10 MW (7M, 3F)      |                 | 32.8 (9.3)  | 80.3 (9.1)   | 25.5 (2.2)                | 1.32 (0.29)%   | -           | -           |        |                              |               | 150 (~22.1)                  | Fructose         | High fructose diet                                       |                   |                             |           |                      |      |
| Control                                     | 10 MW (5M, 5F)      |                 | 28.2 (8.4)  | 80.7 (7.5)   | 26.2 (2.4)                | 1.59 (0.26)%   | -           | -           |        |                              |               |                              | Glucose          | High glucose diet                                        |                   |                             |           |                      |      |
| Sweetened dairy alternative (soy)           |                     |                 |             |              |                           |                |             |             |        |                              |               |                              |                  |                                                          |                   |                             |           |                      |      |
| Eslami et al. 2019                          | 64 OW/OB (19M, 45F) | OP, Iran        | 45.7 (10.1) |              |                           |                |             |             | P      | Supp                         | Yes           |                              |                  |                                                          |                   | 55:30:15                    | Negative  | 8 wk                 | A, I |
| Intervention                                | 32 OW/OB (10M, 22F) |                 | 46.3 (10.5) | 83.8 (9.8)   | 30.9 (3.6)                | -              | 41.1 (18.6) | 30.8 (11.1) |        |                              |               | 5 (1)                        | Sucrose          | 240mL/d sweetened soy beverage                           |                   |                             |           |                      |      |
| Control                                     | 32 OW/OB (9M, 23F)  |                 | 45.2 (9.9)  | 84.5 (14.0)  | 31.4 (3.7)                | -              | 42.5 (17.5) | 32.3 (14.9) |        |                              |               |                              | Mixed comparator | One serving of grains/starches and fats/oils food groups |                   |                             |           |                      |      |

| Study, year                         | Participants (M, F)               | Setting         | Age, years*              | Baseline    |                          |               |                        |                        | Design | Feeding Control <sup>a</sup> | Randomization | Dose, g/d (% E) <sup>b</sup> | Interventions                   | Food matrix                                                                                       | Diet <sup>c</sup>      | Energy Balance <sup>e</sup> | Follow-up | Funding <sup>g</sup> |                                  |
|-------------------------------------|-----------------------------------|-----------------|--------------------------|-------------|--------------------------|---------------|------------------------|------------------------|--------|------------------------------|---------------|------------------------------|---------------------------------|---------------------------------------------------------------------------------------------------|------------------------|-----------------------------|-----------|----------------------|----------------------------------|
|                                     |                                   |                 |                          | BW, kg*     | BMI, kg/m <sup>2</sup> * | IHCL (units)* | ALT (U/L)*             | AST (U/L)*             |        |                              |               |                              |                                 |                                                                                                   |                        |                             |           |                      |                                  |
| 100% Fruit juice                    |                                   |                 |                          |             |                          |               |                        |                        |        |                              |               |                              |                                 |                                                                                                   |                        |                             |           |                      |                                  |
| Ponce et al. 2019                   | 72 MetS (23 M, 49 F)              | OP, Brazil      | 48 (9)                   | 95 (16)     | 34.6 (4.1)               | -             | 34 (12)                | 22 (7)                 | P      | Supp                         | Yes           | 44 (~12.2)                   | Fruit Fat                       | 500mL/d 100% orange juice<br>Energy equivalent nuts                                               | 49:27:24<br>48:28:24   | Neutral                     | 12 wk     | A, I                 |                                  |
|                                     | Intervention                      |                 | 49 (9)                   | 96 (16)     | 34.0 (4.2)               |               |                        |                        |        |                              |               |                              |                                 |                                                                                                   |                        |                             |           |                      |                                  |
|                                     | Control                           |                 | 36 MetS (11 M, 25 F)     | 46 (9)      | 95 (15)                  |               |                        |                        |        |                              |               |                              |                                 |                                                                                                   |                        |                             |           |                      | 35.1 (4.1)                       |
| Ribeiro et al. 2017                 | 78 OB (24M, 54F)                  | OP, Brazil      | 36 (1.0)                 | 97.5 (12.0) | 33.0 (3.0)               | -             | 22 (8)                 | 21 (9)                 | P      | Supp                         | Yes           | 44 (~8.8)                    | Fruit juice<br>Mixed comparator | 500mL/d orange juice<br>Energy equivalent food item                                               | ~60:35:15              | Negative                    | 12 wk     | A, I                 |                                  |
|                                     | Intervention                      |                 | 39 OB                    | 27 (1.0)    | 97.0 (12.0)              |               |                        |                        |        |                              |               |                              |                                 |                                                                                                   |                        |                             |           |                      | 33.0 (3.0)                       |
|                                     | Control                           |                 | 39 OB                    | 33 (1.0)    | 98.0 (12.0)              |               |                        |                        |        |                              |               |                              |                                 |                                                                                                   |                        |                             |           |                      | 35.0 (4.0)                       |
| Fruit                               |                                   |                 |                          |             |                          |               |                        |                        |        |                              |               |                              |                                 |                                                                                                   |                        |                             |           |                      |                                  |
| Agebratt et al. 2016                | 30 MW (18M, 12F)                  | OP, Sweden      | 23.5 (3.7)               | 22.3 (1.9)  |                          | 2.11 (0.75)%  | -                      | -                      | P      | DA                           | Yes           | 96 (~14.6)                   | Fruit Fat                       | 7kcal/kg BW/d (9.58g fruit)<br>7kcal/kg BW/d walnuts                                              | NR                     | Positive                    | 8 wk      | A                    |                                  |
|                                     | Intervention                      |                 | 15 MW (7M, 8F)           | 66.5 (8.7)  | 22.2 (1.6)               |               |                        |                        |        |                              |               |                              |                                 |                                                                                                   |                        |                             |           |                      |                                  |
|                                     | Control                           |                 | 15 MW (11M, 4F)          | 73.6 (9.0)  | 22.5 (2.3)               |               |                        |                        |        |                              |               |                              |                                 |                                                                                                   |                        |                             |           |                      |                                  |
| Lehtonen et al. 2011 (BB)           | 80 OW/OB (OM, 80F)                | OP, Finland     | 44.2 (6.2)               | 81.6 (8.5)  | 29.6 (2.1)               | -             | 21.0 (9.1)             | -                      | C      | Supp                         | Yes           | 8.4 (1.7) <sup>f</sup>       | Fruit<br>Mixed comparator       | 100g/d bilberries<br>Regular diet                                                                 | NR                     | Neutral                     | 33-35 d   | A, I                 |                                  |
|                                     | Intervention                      |                 |                          |             |                          |               |                        |                        |        |                              |               |                              |                                 |                                                                                                   |                        |                             |           |                      |                                  |
|                                     | Control                           |                 |                          |             |                          |               |                        |                        |        |                              |               |                              |                                 |                                                                                                   |                        |                             |           |                      |                                  |
| Dried fruit                         |                                   |                 |                          |             |                          |               |                        |                        |        |                              |               |                              |                                 |                                                                                                   |                        |                             |           |                      |                                  |
| Kaliora et al. 2016                 | 44 NAFLD                          | OP, Greece      | 50.7 (10.9) <sup>h</sup> | 85.7 (14.3) | 29.5 (4.3)               | -             | 30.0 (14.0)            | 22.8 (5.8)             | P      | Supp                         | Yes           | 24.2 (~5.0) <sup>j</sup>     | Dried fruit                     | 36g/d Corinthian currants<br>Snacks (low fat yogurt, mini crackers, or bread with low fat cheese) | 50:30:20               | Negative                    | 24 wk     | A, I                 |                                  |
|                                     | Intervention                      |                 |                          |             |                          |               |                        |                        |        |                              |               |                              |                                 |                                                                                                   |                        |                             |           |                      | 23 NAFLD                         |
|                                     | Control                           |                 |                          |             |                          |               |                        |                        |        |                              |               |                              |                                 |                                                                                                   |                        |                             |           |                      | 21 NAFLD                         |
| Kanellos et al. 2017                | 33 NW                             | OP, Greece      | 30.8 (7.5)               | 77.5 (13.8) | 24.7 (2.7)               | -             | 19.2 (7.6)             | 21.1 (5.4)             | P      | Supp                         | Yes           | ~60 (~12) <sup>j</sup>       | Dried fruit                     | 90g/d raisins<br>Snacks (low fat yogurt, mini crackers, or bread with low fat cheese)             | 41:27:13               | Neutral                     | 4 wk      | A, I                 |                                  |
|                                     | Intervention                      |                 |                          |             |                          |               |                        |                        |        |                              |               |                              |                                 |                                                                                                   |                        |                             |           |                      | 20 NW                            |
|                                     | Control                           |                 |                          |             |                          |               |                        |                        |        |                              |               |                              |                                 |                                                                                                   |                        |                             |           |                      | 13 NW                            |
| Lehtonen et al. 2011 (SB)           | 80 OW/OB (OM, 80F)                | OP, Finland     | 44.2 (6.2)               | 81.6 (8.5)  | 29.6 (2.1)               | -             | 21.0 (9.1)             | -                      | C      | Supp                         | Yes           | 10.3 (2) <sup>f</sup>        | Dried fruit<br>Mixed comparator | 100g/d dried sea buckthorn berries<br>Regular diet                                                | NR                     | Neutral                     | 33-35 d   | A, I                 |                                  |
|                                     | Intervention                      |                 |                          |             |                          |               |                        |                        |        |                              |               |                              |                                 |                                                                                                   |                        |                             |           |                      |                                  |
|                                     | Control                           |                 |                          |             |                          |               |                        |                        |        |                              |               |                              |                                 |                                                                                                   |                        |                             |           |                      |                                  |
| Added nutritive (caloric) sweetener |                                   |                 |                          |             |                          |               |                        |                        |        |                              |               |                              |                                 |                                                                                                   |                        |                             |           |                      |                                  |
| Simons et al. 2020                  | 37 OW/OB & fatty liver (M, F)     | OP, Netherlands | 52 (38-62)               | -           | 32.4 (4.3)               | 5.9 (6.5)%    | -                      | -                      | P      | Supp                         | Yes           | ~46.9 (9.4)                  | Fructose                        | 3 sachets/d fructose mixed in water or food                                                       | ~37:38:21              | Neutral                     | 6 wk      | A                    |                                  |
|                                     | Intervention                      |                 |                          |             |                          |               |                        |                        |        |                              |               |                              |                                 |                                                                                                   |                        |                             |           |                      | 21 OW/OB & fatty liver (6M, 15F) |
|                                     | Control                           |                 |                          |             |                          |               |                        |                        |        |                              |               |                              |                                 |                                                                                                   |                        |                             |           |                      | 16 OW/OB & fatty liver (6M, 10F) |
| Sweets and desserts                 |                                   |                 |                          |             |                          |               |                        |                        |        |                              |               |                              |                                 |                                                                                                   |                        |                             |           |                      |                                  |
| Claesson et al. 2009                | 25 MW (11M, 14F)                  | OP, Sweden      | 23.4 (2.7)               | 68.0 (6.7)  | 22.2 (1.7)               | -             | 23.6 (6.6)             | 24.4 (3.5)             | P      | Supp                         | Yes           | 278 (~36.6)                  | Sucrose Fat                     | 20kcal/kg BW/d candy<br>20kcal/kg BW/d peanuts                                                    | ~66:22:11<br>~32:48:18 | Positive                    | 2 wk      | A                    |                                  |
|                                     | Intervention                      |                 | 12 MW (5M, 7F)           |             |                          |               |                        |                        |        |                              |               |                              |                                 |                                                                                                   |                        |                             |           |                      |                                  |
|                                     | Control                           |                 | 13 MW (6M, 7F)           |             |                          |               |                        |                        |        |                              |               |                              |                                 |                                                                                                   |                        |                             |           |                      |                                  |
| Dikariyanto et al. 2020             | IHL: 45 pre-CVD, ALT: 102 pre-CVD | OP, UK          | 56.0 (10.7) <sup>h</sup> | -           | 26.7 (4.5) <sup>h</sup>  | 2.9 (4.0)%    | 22.0 (9.8)             | -                      | P      | Supp                         | Yes           | 15.1 (3.0)                   | Sucrose                         | 20%E from muffins                                                                                 | ~45:34:16              | Neutral                     | 6 wk      | A, I                 |                                  |
|                                     | Intervention                      |                 |                          |             |                          |               |                        |                        |        |                              |               |                              |                                 |                                                                                                   |                        |                             |           |                      | IHL: 22 pre-CVD, ALT: 49 pre-CVD |
|                                     | Control                           |                 |                          |             |                          |               |                        |                        |        |                              |               |                              |                                 |                                                                                                   |                        |                             |           |                      | IHL: 23 pre-CVD, ALT: 53 pre-CVD |
| Kelsay et al. 1974                  | 8 MW (OM, 8F)                     | OP, USA         | (18-23)                  | (43.6-65.3) | -                        | -             | 5.0 (1.4)<br>5.5 (1.7) | 8.6 (2.8)<br>8.0 (0.8) | C      | Met                          | Yes           | 212.5 (~42)                  | Sucrose Glucose                 | Sucrose patty<br>Glucose patty                                                                    | 50:38:12               | Neutral                     | 4 wk      | NR                   |                                  |
|                                     | Intervention                      |                 |                          |             |                          |               |                        |                        |        |                              |               |                              |                                 |                                                                                                   |                        |                             |           |                      |                                  |
|                                     | Control                           |                 |                          |             |                          |               |                        |                        |        |                              |               |                              |                                 |                                                                                                   |                        |                             |           |                      |                                  |

| Study, year                   | Participants (M, F) | Setting     | Age, years*  | Baseline    |                          |               |                   |                  | Design | Feeding Control <sup>a</sup> | Randomization | Dose, g/d (% E) <sup>b</sup> | Interventions    | Food matrix                                                                                                                   | Diet <sup>c</sup> | Energy Balance <sup>d</sup> | Follow-up | Funding <sup>e</sup> |
|-------------------------------|---------------------|-------------|--------------|-------------|--------------------------|---------------|-------------------|------------------|--------|------------------------------|---------------|------------------------------|------------------|-------------------------------------------------------------------------------------------------------------------------------|-------------------|-----------------------------|-----------|----------------------|
|                               |                     |             |              | BW, kg*     | BMI, kg/m <sup>2</sup> * | IHCL (units)* | ALT (U/L)*        | AST (U/L)*       |        |                              |               |                              |                  |                                                                                                                               |                   |                             |           |                      |
| Mixed sources (with SSBs)     |                     |             |              |             |                          |               |                   |                  |        |                              |               |                              |                  |                                                                                                                               |                   |                             |           |                      |
| Lehtonen et al. 2010          | 50 OW (0M, 50F)     | OP, Finland | 42.9 (35-52) | 81.8        | 29.4                     |               |                   |                  | P      | Supp                         | Yes           |                              |                  |                                                                                                                               |                   | Neutral                     | 20 wk     | A, I                 |
| Intervention                  | 28 OW (0M, 28F)     |             |              | 81.9        | 29.3 (2.2)               | -             | 20.3 (5.5)        | -                |        |                              |               | ~14.7 (~3.3) <sup>f</sup>    | Fruit            | 163g/d berry-containing products (fresh, dried, juice, bread, powder, oil); no SSBs                                           | ~50:32:17         |                             |           |                      |
|                               | 22 OW (0M, 22F)     |             |              | 81.7        | 29.5 (1.8)               | -             | 18.8 (7.6)        | -                |        |                              |               |                              | Mixed comparator | Snacks                                                                                                                        | ~46:35:19         |                             |           |                      |
| Luukkonen et al. 2018 (SAT)   | 26 OW/OB (12M, 14F) | OP, Finland |              |             |                          |               |                   |                  | P      | Met                          | Yes           |                              |                  |                                                                                                                               |                   | Positive                    | 3 wk      | A                    |
| Intervention                  | 12 OW/OB (6M, 6F)   |             | 45 (10)      | -           | 33 (6)                   | 4.3 (4.7)%    | 24 (11)           | 26 (6)           |        |                              |               | ~249.4 (~33.8)               | Sugar            | 2.8dL orange juice, 4.3dL SSBs, and 200g candy                                                                                | 64:24:12          |                             |           |                      |
|                               | 14 OW/OB (6M, 8F)   |             | 48 (8)       | -           | 30 (6)                   | 4.9 (6.6)%    | 28 (15)           | 26 (5)           |        |                              |               |                              | Saturated fat    | 30g coconut oil, 40g butter, 100g of 40% fat containing blue cheese                                                           | 26:59:15          |                             |           |                      |
| Luukkonen et al. 2018 (UNSAT) | 24 OW/OB (11M, 13F) | OP, Finland |              |             |                          |               |                   |                  | P      | Met                          | Yes           |                              |                  |                                                                                                                               |                   | Positive                    | 3 wk      | A                    |
| Intervention                  | 12 OW/OB (6M, 6F)   |             | 45 (10)      | -           | 33 (6)                   | 4.3 (4.7)%    | 24 (11)           | 26 (6)           |        |                              |               | ~249.4 (~33.8)               | Sugar            | 2.8dL orange juice, 4.3dL SSBs, and 200g candy                                                                                | 64:24:12          |                             |           |                      |
|                               | 12 OW/OB (5M, 7F)   |             | 52 (10)      | -           | 31 (6)                   | 4.8 (4.9)%    | 26 (9)            | 27 (7)           |        |                              |               |                              | Unsaturated fat  | 36g olive oil, 26g pesto, 54g pecan nuts, and 20g butter                                                                      | 60:23:13          |                             |           |                      |
| Nier et al. 2018              | 13 NAFLD (7M, 5F)   | OP, Germany | 7.7 (0.8)    | -           | -                        |               |                   |                  | P      | DA                           | No            |                              |                  |                                                                                                                               |                   |                             |           |                      |
| Intervention                  | 6 NAFLD (3M, 3F)    |             | 7.5 (0.4)    |             |                          | -             | 26.0 (13.7)       | 38.0 (12.3)      |        |                              |               | 69 (13)                      | Sucrose          | Sucrose and fructose diet; includes SSBs                                                                                      | ~49:37:13         | Neutral                     | 52 wk     | A                    |
|                               | 7 NAFLD (4M, 2F)    |             | 8.0 (0.3)    |             |                          | -             | 20.0 (2.7)        | 32.0 (7.9)       |        |                              |               | 54 (10)                      | Starch           | Reduce fructose intake to ~50% and replace with foods containing less fructose of the same food category                      |                   |                             |           |                      |
| Parry et al. 2020             | 16 OW/OB (16M, 0F)  | OP, UK      | 47.9 (4.4)   |             | 27.7 (1.6)               |               |                   |                  | C      | Supp                         | Yes           |                              |                  |                                                                                                                               |                   | Neutral                     | 4 wk      | A                    |
| Intervention                  |                     |             |              | 89.8 (10)   |                          | 4.6 (3.6)%    | 10 (4)            | -                |        |                              |               | ~100 (~20)                   | Sucrose          | High free-sugar diet; includes SSBs                                                                                           | 65:20:15          |                             |           |                      |
|                               | Control             |             |              | 89.3 (10.4) |                          | 4.4 (4)%      | 11 (4)            | -                |        |                              |               |                              | Fat              | High saturated fat diet                                                                                                       | 40:45:15          |                             |           |                      |
| Purkins et al. 2004           | 12 MW (12M, 0F)     | IP, UK      | (20-41)      |             |                          |               |                   |                  | C      | Met                          | Yes           |                              |                  |                                                                                                                               |                   | Positive                    | 8 d       | NR                   |
| Intervention                  |                     |             |              | 76.6 (10.0) | -                        |               |                   |                  |        |                              |               | 352 (32)                     | Sucrose          | High carbohydrate, high calorie diet                                                                                          | 59:30:11          |                             |           |                      |
|                               | Control             |             |              | 76.4 (10.2) | -                        |               |                   |                  |        |                              |               | 45 (4)                       | Fat              | High fat, high calorie diet                                                                                                   | 29:58:13          |                             |           |                      |
| Schwimmer et al. 2019         | 40 NAFLD (40M, 0F)  | OP, USA     | 13 (1.9)     |             |                          |               |                   |                  | P      |                              | Yes           |                              |                  |                                                                                                                               |                   | Neutral                     | 8 wk      | A                    |
| Intervention                  | 20 NAFLD (20M, 0F)  |             | 13.4 (1.9)   | 88.7 (26.3) | 32.2 (6.3)               | 21 (8)%       | 72.5 (57.0-113.5) | 39.0 (34.5-63.5) |        | DA                           |               | ~88.2 (22)                   | Habitual diet    | High sugar diet, ≥3 servings/wk or ≥8oz/wk juice or SSBs                                                                      | 49:33:19          |                             |           |                      |
|                               | 20 NAFLD (20M, 0F)  |             | 12.8 (1.8)   | 88.1 (21.5) | 33.7 (5.6)               | 25 (11)%      | 82.0 (57.0-144.0) | 44.0 (32.0-79.0) |        | Met                          |               | ~62.4 (15)                   | Mixed comparator | Free sugar intake restriction and substituted for low- to no-added-sugar food items                                           | 43:36:22          |                             |           |                      |
| Umpleby et al. 2017 (H)       | 14 OW/OB (14M, 0F)  | OP, UK      | 54 (41-65)   | 89.7 (9.0)  | 28.4 (1.9)               | 2.5 (1.12)%   | -                 | -                | C      | Supp                         | Yes           |                              |                  |                                                                                                                               |                   | Neutral                     | 12 wk     | A                    |
| Intervention                  |                     |             |              |             |                          |               |                   |                  |        |                              |               | 126 (20.5)                   | Sucrose          | High sugar diet with intake above 2.5th percentile of non-milk extrinsic sugars intake in the UK population                   | 54:26:15          |                             |           |                      |
|                               | Control             |             |              |             |                          |               |                   |                  |        |                              |               | 53 (6)                       | Starch           | Low sugar diet with intake below 2.5th percentile of non-milk extrinsic sugars intake in the UK population                    | 44:34:16          |                             |           |                      |
| Umpleby et al. 2017 (NAFLD)   | 11 NAFLD (11M, 0F)  | OP, UK      | 59 (49-64)   | 90.0 (7.3)  | 28.9 (1.0)               | 17.2 (8.95)%  | -                 | -                | C      | Supp                         | Yes           |                              |                  |                                                                                                                               |                   | Neutral                     | 12 wk     | A                    |
| Intervention                  |                     |             |              |             |                          |               |                   |                  |        |                              |               | 126 (20.5)                   | Sucrose          | High sugar diet with intake above 2.5th percentile of non-milk extrinsic sugars intake in the UK population                   | 50:28:15          |                             |           |                      |
|                               | Control             |             |              |             |                          |               |                   |                  |        |                              |               | 58 (6)                       | Starch           | Low sugar diet with intake below 2.5th percentile of non-milk extrinsic sugars intake in the UK population                    | 42:33:17          |                             |           |                      |
| Vos et al. 2009               | 10 NAFLD            | OP, USA     |              |             |                          |               |                   |                  | P      | DA                           | Yes           |                              |                  |                                                                                                                               |                   | Neutral                     | 24 wk     | A                    |
| Intervention                  | 4 NAFLD             |             | 12.5 (2)     | -           | -                        | -             | 103.3 (111.2)     | 65.3 (51.2)      |        |                              |               | 31 (7)                       | Sucrose          | Low-fat diet, based on the American Heart Association recommendations                                                         | 51:31:19          |                             |           |                      |
|                               | 6 NAFLD             |             | 13.3 (1.6)   | -           | -                        | -             | 125.5 (22.0)      | 71.2 (29.9)      |        |                              |               | 23 (5.8)                     | Mixed comparator | Low-fructose diet; elimination of sugar-containing beverages, fruit juice, and food items containing high-fructose corn syrup | 49:37:16          |                             |           |                      |
| Control                       |                     |             |              |             |                          |               |                   |                  |        |                              |               |                              |                  |                                                                                                                               |                   |                             |           |                      |

| Study, year                                                                    | Participants (M, F)                                                                | Setting         | Age, years*                            | Baseline                                   |                                        |                                             |             |            | Design | Feeding Control <sup>a</sup> | Randomization | Dose, g/d (% E) <sup>b</sup>    | Interventions                                 | Food matrix                                                                                        | Diet <sup>c</sup>                                | Energy Balance <sup>d</sup> | Follow-up    | Funding <sup>e</sup> |
|--------------------------------------------------------------------------------|------------------------------------------------------------------------------------|-----------------|----------------------------------------|--------------------------------------------|----------------------------------------|---------------------------------------------|-------------|------------|--------|------------------------------|---------------|---------------------------------|-----------------------------------------------|----------------------------------------------------------------------------------------------------|--------------------------------------------------|-----------------------------|--------------|----------------------|
|                                                                                |                                                                                    |                 |                                        | BW, kg*                                    | BMI, kg/m <sup>2</sup> *               | IHCL (units)*                               | ALT (U/L)*  | AST (U/L)* |        |                              |               |                                 |                                               |                                                                                                    |                                                  |                             |              |                      |
|                                                                                |                                                                                    |                 |                                        | Addition Trials (Hypercaloric Comparison)  |                                        |                                             |             |            |        |                              |               |                                 |                                               |                                                                                                    |                                                  |                             |              |                      |
|                                                                                |                                                                                    |                 |                                        | SSB                                        |                                        |                                             |             |            |        |                              |               |                                 |                                               |                                                                                                    |                                                  |                             |              |                      |
| Aeberli et al. 2011<br>Intervention<br>Intervention<br>Intervention<br>Control | 29 NW (29M, 0F)                                                                    | OP, Switzerland | 26.3 (6.6)                             | 73.7 (8.8)                                 | 22.4 (1.9)                             | -                                           | 23.0 (7.0)  | 26.0 (6.0) | C      | Supp                         | Yes           | 40 (~7)<br>80 (~13)<br>80 (~13) | Fructose<br>Fructose<br>Sucrose<br>Diet alone | 600mL/d fructose SSB<br>600mL/d fructose SSB<br>600mL/d sucrose SSB<br>Reduce free fructose intake | ~51:35:14<br>~55:32:14<br>~55:32:13<br>~46:38:16 | Positive                    | 3 wk         | A, I                 |
| Debray et al. 2021 (Ctrl)<br><br>Intervention<br>Control                       | 6 OW/OB (2M, 4F)                                                                   | OP, Belgium     | 40.93 (5.41)                           | 72.78 (21.43)                              | 24.93 (6.00)                           | -                                           | -           | -          | C      | Supp                         | Yes           | 103.8 (23.58)                   | Fructose<br><br>Diet alone                    | High fructose diet (1.4g/kg body weight/d in the form of SSBs)<br><br>Low fructose diet (<10g/d)   | <br><br>50:31:18<br>33:45:22                     | Positive                    | 1 wk         | A                    |
| Debray et al. 2021 (hHFI)<br><br>Intervention<br>Control                       | 6 OW/OB (2M, 4F)                                                                   | OP, Belgium     | 40.68 (6.12)                           | 71.52 (17.69)                              | 25.02 (5.34)                           | -                                           | -           | -          | C      | Supp                         | Yes           | 101.58 (~20.18)                 | Fructose<br><br>Diet alone                    | High fructose diet (1.4g/kg body weight/d in the form of SSBs)<br><br>Low fructose diet (<10g/d)   | <br><br>50:35:15<br>36:43:22                     | Positive                    | 1 wk         | A                    |
| Johnston et al. 2013<br>Intervention<br>Control                                | 32 OW (32M, 0F)<br>15 OW (15M, 0F)<br>17 OW (17M, 0F)                              | OP, UK          | 34 (9.9)<br>35 (11)<br>33 (9)          | 96.8 (7.4)<br>93.9 (8.7)<br>28.9 (1.7)     | 30.0 (1.4)<br>7.2 (5.6)%<br>8.0 (5.2)% | 7.6 (5.3)%<br>7.2 (5.6)%<br>8.0 (5.2)%      | 28.9 (12.6) | -          | P      | Met/Supp                     | No            | ~221 (25)                       | Fructose<br>Glucose                           | Fructose dissolved in water<br>Glucose dissolved in water                                          | ~55:30:15                                        | Positive                    | 2 wk         | A                    |
| Koopman et al. 2014 (HS-F)<br><br>Intervention<br>Control                      | 13 NW (13M, 0F)<br>8 NW (8M, 0F)<br>5 NW (5M, 0F)                                  | OP, Netherlands | 21.9 (2.8)<br>23.0 (3.1)               | 81.0 (8.8)<br>76.6 (7.7)                   | 22.6 (1.8)<br>22.6 (2.3)               | 0.8 (0.5)%<br>1.3 (0.5)%                    | -           | -          | P      | Supp                         | Yes           | ~237 (27)                       | Sucrose<br>Diet alone                         | 3 servings/d sucrose-sweetened SSB<br>No beverage                                                  | ~56:29:12<br>NR                                  | Positive                    | 6 wk         | A                    |
| Koopman et al. 2014 (HS-S)<br><br>Intervention<br>Control                      | 12 NW (12M, 0F)<br>7 NW (7M, 0F)<br>5 NW (5M, 0F)                                  | OP, Netherlands | 22 (2.5)<br>23.0 (3.1)                 | 77.4 (7.9)<br>76.6 (7.7)                   | 21.7 (1.1)<br>22.6 (2.3)               | 1.5 (1.0)%<br>1.3 (0.5)%                    | -           | -          | P      | Supp                         | Yes           | ~237 (27)                       | Sucrose<br>Diet alone                         | 3 servings/d sucrose-sweetened SSB<br>No beverage                                                  | ~58:27:12<br>NR                                  | Positive                    | 6 wk         | A                    |
| Lê et al. 2006<br>Intervention<br>Control                                      | 7 NW (7M, 0F)                                                                      | OP, Switzerland | 24.7 (3.4)                             | 69.3 (6.9)                                 | (19-25)                                | 6.21 (2.09) mmol/kg                         | -           | -          | C      | Supp                         | No            | 104 (~18)                       | Fructose<br>Diet alone                        | 20% fructose solution<br>No beverage                                                               | 55:30:15                                         | Positive                    | 4 wk<br>2 wk | A                    |
| Lê et al. 2009 (H)<br>Intervention<br>Control                                  | 8 NW (8M, 0F)                                                                      | OP, Switzerland | 24 (2.8)                               | -                                          | -                                      | -                                           | 16.9 (1.2)  | -          | C      | Met                          | Yes           | ~220 (35)                       | Fructose<br>Diet alone                        | 20% fructose solution<br>No beverage                                                               | 55:30:15                                         | Positive                    | 1 wk         | A, I                 |
| Lê et al. 2009 (ODM2)<br>Intervention<br>Control                               | 16 ODM2 (16M, 0F)                                                                  | OP, Switzerland | 24.7 (5.2)                             | -                                          | -                                      | -                                           | 16.4 (4)    | -          | C      | Met                          | Yes           | ~220 (35)                       | Fructose<br>Diet alone                        | 20% fructose solution<br>No beverage                                                               | 55:30:15                                         | Positive                    | 1 wk         | A, I                 |
| Maersk et al. 2012<br>Intervention<br>Control<br>Control                       | 35 OW/OB (14M, 21F)<br>10 OW/OB (6M, 4F)<br>12 OW/OB (3M, 9F)<br>13 OW/OB (5M, 8F) | OP, Denmark     | 39 (6)<br>39 (8)<br>39 (8)             | 97.8 (39.5)<br>92.2 (10.9)<br>101.7 (22.4) | 31.3 (2.9)<br>32.8 (3.8)<br>32.2 (4.6) | 0.04 (0.04)AU<br>0.2 (0.2)AU<br>0.1 (0.1)AU | -<br>-<br>- | -          | P      | Supp                         | Yes           | 106 (~21.2)                     | Sucrose<br>NNS<br>Water                       | Sucrose cola<br>Diet cola (no sucrose)<br>Water                                                    | NR                                               | Positive                    | 24 wk        | A, I                 |
| Ngo Sock et al. 2010<br>Intervention<br>Control                                | 11 NW (11M, 0F)                                                                    | OP, Switzerland | 24.6 (2.0)                             | -                                          | -                                      | 2.4 (0.8)log mmol/kg                        | 26.0 (13.3) | -          | C      | Met                          | Yes           | ~214 (35)                       | Fructose<br>Diet alone                        | SSB<br>No beverage                                                                                 | 55:30:15                                         | Positive                    | 1 wk         | A                    |
| Sigala et al. 2021<br><br>Intervention<br><br>Intervention<br><br>Control      | 75 MW (38M, 37F)<br>28 MW (15M, 13F)<br>24 MW (12M, 12F)<br>23 MW (11M, 12F)       | IP/OP, USA      | 26.8 (6.6)<br>25.9 (6.3)<br>25.4 (6.2) | 72.9 (14.5)<br>71.9 (12.1)<br>71.8 (10.6)  | 24.9 (4.0)<br>25.3 (3.4)<br>24.8 (3.3) | 2.3 (0.8)%<br>1.6 (0.8)%<br>1.9 (0.4)%      | -<br>-<br>- | -          | P      | Met + Supp                   | No            | (25)<br><br>(25)                | HFCS<br>Sucrose<br>NNS                        | HFCS as 25%E in Kool-Aid<br>Sucrose as 25%E in Kool-Aid<br>Aspartame in Market Pantry drink mix    | 55:30:15                                         | Positive                    | 2 wk         | A                    |

| Study, year                                        | Participants (M, F)         | Setting         | Age, years*  | Baseline    |                          |               |             |             | Design | Feeding Control <sup>a</sup> | Randomization | Dose, g/d (% E) <sup>b</sup> | Interventions          | Food matrix                                                                           | Diet <sup>c</sup>    | Energy Balance <sup>d</sup> | Follow-up    | Funding <sup>e</sup> |      |
|----------------------------------------------------|-----------------------------|-----------------|--------------|-------------|--------------------------|---------------|-------------|-------------|--------|------------------------------|---------------|------------------------------|------------------------|---------------------------------------------------------------------------------------|----------------------|-----------------------------|--------------|----------------------|------|
|                                                    |                             |                 |              | BW, kg*     | BMI, kg/m <sup>2</sup> * | IHCL (units)* | ALT (U/L)*  | AST (U/L)*  |        |                              |               |                              |                        |                                                                                       |                      |                             |              |                      |      |
| SSB                                                |                             |                 |              |             |                          |               |             |             |        |                              |               |                              |                        |                                                                                       |                      |                             |              |                      |      |
| Silbernagel et al. 2011<br>Intervention<br>Control | 10 MW (7M, 3F)              | OP, Germany     | 32.8 (9.3)   | 80.3 (9.1)  | 25.5 (2.2)               | 1.5 (0.9)%    | -           | -           | C      | Supp                         | No            | 150 (~22)                    | Fructose<br>Diet alone | Fructose dissolved in water<br>No beverage                                            | 50:35:15             | Positive                    | 4 wk<br>2 wk | A                    |      |
| Sobrecases et al. 2010<br>Intervention<br>Control  | 12 NW (12M, 0F)             | OP, Switzerland | 23.9 (2.2)   | -           | 22.6 (0.2)               | -             | -           | -           | C      | Supp                         | No            | ~214 (35)                    | Fructose<br>Diet alone | SSB<br>No beverage                                                                    | 55:30:15             | Positive                    | 1 wk         | A                    |      |
| Zafrilla et al. 2021                               | 136 OW (80M, 56F)           | OP, Spain       |              |             |                          |               |             |             | P      | Supp                         | Yes           |                              |                        | Citrus juice and maqui extract<br>with different sweeteners<br>added                  | NR                   | Positive                    | 60 d         | A                    |      |
| Intervention                                       | 45 OW (26 M, 19 F)          |                 | 42 (7)       | 85 (12)     | 29 (3)                   | -             | 25 (7)      | 26 (7)      |        |                              |               | 24.75 (5)                    | Sucrose                | 7.5g/100mL and consumed<br>330 mL/day                                                 |                      |                             |              |                      |      |
| Control                                            | 46 OW (27 M, 19 F)          |                 | 44 (7)       | 83 (11)     | 28 (3)                   | -             | 22 (7)      | 26 (6)      |        |                              |               |                              | Stevia                 | 4mg/100mL and consumed<br>330 mL/day                                                  |                      |                             |              |                      |      |
| Control                                            | 45 OW (27 M, 18 F)          |                 | 42 (8)       | 82 (11)     | 28 (2)                   | -             | 20 (7)      | 24 (6)      |        |                              |               |                              | Sucralose              | 4mg/100mL and consumed<br>330 mL/day                                                  |                      |                             |              |                      |      |
| 100% Fruit juice                                   |                             |                 |              |             |                          |               |             |             |        |                              |               |                              |                        |                                                                                       |                      |                             |              |                      |      |
| Amagase et al. 2009                                | 60 MW                       | OP, China       | 58.9 (55-72) |             | -                        |               |             |             | P      | Supp                         | Yes           |                              |                        |                                                                                       |                      | NR                          | Positive     | 30 d                 | I    |
| Intervention                                       | 30 MW                       |                 | 58.7 (5.3)   | 61.8 (9.7)  |                          | -             | 23.6 (15.2) | 25.9 (6.4)  |        |                              |               | ~12 (2.4)                    | Fruit juice            | 120mL/d GoChi goji berry<br>fruit juice, equivalent to 150g<br>fresh fruit            |                      |                             |              |                      |      |
| Control                                            | 30 MW                       |                 | 59.1 (5.6)   | 60.9 (9.5)  |                          | -             | 23.6 (10.5) | 26.5 (7.6)  |        |                              |               |                              | NNS                    | Sucralose and artificially<br>flavored beverage                                       |                      |                             |              |                      |      |
| Banini et al. 2006                                 | 23 OW/OB (11M, 12F)         | OP, USA         |              |             |                          |               |             |             | P      | Supp                         | Yes           |                              |                        |                                                                                       |                      | ~50:31:19                   | Positive     | 28 d                 | A, I |
| Intervention                                       | 8 OW/OB (3M, 5F)            |                 | 50 (13)      | -           | 29.3 (4.0)               | -             | 28 (3.7)    | 15.5 (1.7)  |        |                              |               | 22 (4) <sup>j</sup>          | Fruit juice            | 150mL/d muscadine grape<br>juice                                                      |                      |                             |              |                      |      |
| Control                                            | 15 OW/OB (8M, 7F)           |                 | 56 (7.5)     | -           | 27.5 (5.4)               | -             | 27.4 (4.4)  | 19.5 (2.9)  |        |                              |               |                              | Diet alone             | No juice                                                                              |                      |                             |              |                      |      |
| Kojadinovic et al. 2017                            | 23 Dyslipidemia (0M, 23F)   | OP, Serbia      | (40-60)      |             |                          |               |             |             | P      | Supp                         | Yes           |                              |                        |                                                                                       |                      | NR                          | Positive     | 6 wk                 | A    |
| Intervention                                       | 12 Dyslipidemia (0 M, 12 F) |                 |              | -           | 31.98 (3.57)             | -             | 32.8 (15.6) | 23.4 (5.12) |        |                              |               | 37 (7.8)                     | Fruit                  | 300 mL/d Polyphenol-rich<br>pomegranate juice                                         |                      |                             |              |                      |      |
| Control                                            | 11 Dyslipidemia (0 M, 11 F) |                 |              | -           | 27.83 (7.84)             | -             | 26.7 (12.4) | 24.9 (7.5)  |        |                              |               |                              | Water                  | 300 mL/d water                                                                        |                      |                             |              |                      |      |
| Ravn-Haren et al. 2013                             | 23 MW (9M, 14F)             | OP, Denmark     | 36.2 (17.9)  | -           | 22.3 (2.6)               | -             | 19.8 (9.0)  | -           | C      | Supp                         | Yes           |                              |                        |                                                                                       |                      | NR                          | Positive     | 4 wk                 | A    |
| Intervention                                       |                             |                 |              |             |                          |               |             |             |        |                              |               | 63 (~12.6) <sup>k</sup>      | Fruit                  | 500mL/d polyphenolic and<br>pectin restricted diet with<br>cloudy apple juice         |                      |                             |              |                      |      |
| Intervention                                       |                             |                 |              |             |                          |               |             |             |        |                              |               | 51 (~11.8) <sup>k</sup>      | Fruit                  | 500mL/d polyphenolic and<br>pectin restricted diet with<br>clear apple juice          |                      |                             |              |                      |      |
| Control                                            |                             |                 |              |             |                          |               |             |             |        |                              |               |                              | Diet alone             | Polyphenolic and pectin<br>restricted diet                                            |                      |                             |              |                      |      |
| Control                                            |                             |                 |              |             |                          |               |             |             |        |                              |               |                              | Diet alone             | Polyphenolic and pectin<br>restricted diet with apple<br>pomace                       |                      |                             |              |                      |      |
| Fruit                                              |                             |                 |              |             |                          |               |             |             |        |                              |               |                              |                        |                                                                                       |                      |                             |              |                      |      |
| Ravn-Haren et al. 2013                             | 23 MW (9M, 14F)             | OP, Denmark     | 36.2 (17.9)  | -           | 22.3 (2.6)               | -             | 19.8 (9.0)  | -           | C      | Supp                         | Yes           | ~51 (~10.2) <sup>k</sup>     |                        |                                                                                       |                      | NR                          | Positive     | 4 wk                 | A    |
| Intervention                                       |                             |                 |              |             |                          |               |             |             |        |                              |               |                              | Fruit                  | Polyphenolic and pectin<br>restricted diet with whole<br>apples equivalent to ~550g/d |                      |                             |              |                      |      |
| Control                                            |                             |                 |              |             |                          |               |             |             |        |                              |               |                              | Diet alone             | Polyphenolic and pectin<br>restricted diet                                            |                      |                             |              |                      |      |
| Control                                            |                             |                 |              |             |                          |               |             |             |        |                              |               |                              | Diet alone             | Polyphenolic and pectin<br>restricted diet with apple<br>pomace                       |                      |                             |              |                      |      |
| Schell et al. 2019<br>Intervention<br>Control      | 22 DM2 (5M, 20F)            | OP, USA         | 54 (21)      | 104 (55)    | 35.3 (10)                | -             | 45.3 (20.2) | 33.2 (10.3) | C      | Supp                         | Yes           | 11.1 (2.2) <sup>j</sup>      | Fruit<br>No fruit      | 250g/d frozen raspberries<br>No raspberries                                           | 48:34:17<br>45:37:16 | Positive                    | 4 wk         | A, I                 |      |
| Tutino et al. 2021                                 | 40 OW/OB (11M, 29F)         | OP, Italy       |              |             |                          |               |             |             | P      | Supp                         | Yes           |                              |                        |                                                                                       |                      | NR                          | Positive     | 3wk                  | A    |
| Intervention                                       | 21 OW/OB (6 M, 15 F)        |                 | 47.4 (9.5)   | 67.5 (13.0) | 25.3 (4.0)               | -             | 18.6 (7.3)  | 18.7 (3.5)  |        |                              |               | ~57.1 (~11.4)                | Fruit                  | 5g/kg BW/d, ~350g/d black<br>seedless grapes (Autumn<br>Royal)                        |                      |                             |              |                      |      |
| Control                                            | 19 OW/OB (5 M, 14 F)        |                 | 44.1 (10.1)  | 78.0 (18.0) | 27.9 (4.4)               | -             | 22.5 (10.6) | 18.9 (4.3)  |        |                              |               |                              | Diet alone             | No grapes                                                                             |                      |                             |              |                      |      |

| Study, year                                  | Participants (M, F)        | Setting         | Age, years* | Baseline     |                          |                     |             |             | Design | Feeding Control <sup>a</sup> | Randomization | Dose, g/d (% E) <sup>b</sup> | Interventions   | Food matrix                                                                                        | Diet <sup>c</sup> | Energy Balance <sup>d</sup> | Follow-up | Funding <sup>e</sup> |
|----------------------------------------------|----------------------------|-----------------|-------------|--------------|--------------------------|---------------------|-------------|-------------|--------|------------------------------|---------------|------------------------------|-----------------|----------------------------------------------------------------------------------------------------|-------------------|-----------------------------|-----------|----------------------|
|                                              |                            |                 |             | BW, kg*      | BMI, kg/m <sup>2</sup> * | IHCL (units)*       | ALT (U/L)*  | AST (U/L)*  |        |                              |               |                              |                 |                                                                                                    |                   |                             |           |                      |
| Dried fruit                                  |                            |                 |             |              |                          |                     |             |             |        |                              |               |                              |                 |                                                                                                    |                   |                             |           |                      |
| Ahmed et al. 2010                            | 70 MW                      | OP, Pakistan    | 43 (10)     | -            | -                        |                     |             |             | P      | Supp                         | Yes           |                              |                 | 6 dried prunes (22.86g/d), soaked in water overnight and eaten along with water mixture in morning | NR                | Positive                    | 8 wk      | A                    |
|                                              | 35 MW                      |                 |             |              |                          | -                   | 21.8 (1.7)  | 23.7 (1.3)  |        |                              |               | ~8.8 (1.8) <sup>f</sup>      | Dried fruit     |                                                                                                    |                   |                             |           |                      |
| Intervention Control                         | 35 MW                      |                 |             |              |                          | -                   | 23.2 (1.7)  | 27.7 (2.5)  |        |                              |               |                              | Water           |                                                                                                    | Water             |                             |           |                      |
| Irranejad et al. 2020                        | 72 DM2 (21M, 51F)          | OP, Iran        |             |              |                          |                     |             |             | P      | Supp                         | Yes           |                              |                 | 30g/d dried <i>Ziziphus vulgaris</i><br>No <i>Ziziphus vulgaris</i>                                |                   | Positive                    | 12 wk     | A                    |
| Intervention                                 | 36 DM2 (8M, 28F)           |                 | 53.2 (7.8)  | 76.1 (13.3)  | 29.1 (4.1)               | -                   | 30.0 (18.2) | 23.5 (12.4) |        |                              |               | ~8 (2.1) <sup>f</sup>        | Dried fruit     |                                                                                                    |                   | 71:20:16                    |           |                      |
| Control                                      | 36 DM2 (13M, 23F)          |                 | 56.6 (6.0)  | 74.6 (11.0)  | 28.1 (4.1)               | -                   | 25.9 (13.5) | 20.6 (7.1)  |        |                              |               |                              | Diet alone      |                                                                                                    |                   | 69:18:15                    |           |                      |
| Added nutritive (caloric) sweetener          |                            |                 |             |              |                          |                     |             |             |        |                              |               |                              |                 |                                                                                                    |                   |                             |           |                      |
| Bahrami et al. 2009                          | 48 DM2 (13M, 35F)          | OP, Iran        | 57.2 (8.4)  | 70.8 (10.6)  |                          |                     |             |             | P      | Supp                         | Yes           |                              |                 | Natural unprocessed honey<br>No honey                                                              |                   | Positive                    | 8 wk      | A                    |
| Intervention                                 | 25 DM2                     |                 |             | 71.3 (12.7)  | -                        | -                   | 23.2 (6.4)  | 22.7 (9.5)  |        |                              |               | ~125 (~33)                   | Honey           |                                                                                                    |                   | 64:23:15                    |           |                      |
| Control                                      | 23 DM2                     |                 |             | 70.3 (8.1)   | -                        | -                   | 24.9 (8.3)  | 24.0 (9.4)  |        |                              |               |                              | Diet alone      |                                                                                                    |                   | 60:22:15                    |           |                      |
| Tang et al. 2020                             | 95 HIV (81M, 14F)          | IP, Malaysia    | (21-58)     |              |                          |                     |             |             | P      | Met                          | Yes           |                              |                 | 20g/d Tualang honey<br>40g/d Tualang honey<br>60g/d Tualang honey<br>No honey                      | NR                | Positive                    | 6 mo      | A                    |
| Intervention                                 | 26 HIV                     |                 |             | 56.4 (7.8)   | 21.5 (2.6)               | -                   | 33.9 (24.9) | 29.4 (9.9)  |        |                              |               | 16.4 (3.2) <sup>f</sup>      | Honey           |                                                                                                    |                   |                             |           |                      |
| Intervention                                 | 24 HIV                     |                 |             | 58.8 (8.3)   | 22.2 (3.1)               | -                   | 37.9 (50.2) | 33.8 (30.2) |        |                              |               | 32.8 (6.2) <sup>f</sup>      | Honey           |                                                                                                    |                   |                             |           |                      |
| Intervention                                 | 22 HIV                     |                 |             | 54.9 (6.8)   | 20.8 (2.4)               | -                   | 28.0 (24.1) | 32.1 (23.5) |        |                              |               | 49.3 (9.0) <sup>f</sup>      | Honey           |                                                                                                    |                   |                             |           |                      |
| Control                                      | 23 HIV                     |                 |             | 58.3 (7.1)   | 22.7 (2.7)               | -                   | 39.6 (48.2) | 40.0 (43.8) |        |                              |               |                              | Diet alone      |                                                                                                    |                   |                             |           |                      |
| Zakaria et al. 2018                          | 72 Breast cancer (0M, 72F) | OP, Malaysia    |             |              |                          |                     |             |             | P      | Supp                         | Yes           |                              |                 | 20g/d Tualang honey<br><br>No honey                                                                | NR                | Positive                    | 12 wk     | A                    |
|                                              | 36 Breast cancer (0M, 36F) |                 | 56.5 (1.0)  | -            | -                        | -                   | 29.4 (2.5)  | -           |        |                              |               | 16.4 (3.3) <sup>f</sup>      | Added sweetener |                                                                                                    |                   |                             |           |                      |
| Control                                      | 36 Breast cancer (0M, 36F) |                 | 59.6 (1.3)  | -            | -                        | -                   | 25.3 (2.0)  | -           |        |                              |               |                              | Diet alone      |                                                                                                    |                   |                             |           |                      |
| Sweets and desserts                          |                            |                 |             |              |                          |                     |             |             |        |                              |               |                              |                 |                                                                                                    |                   |                             |           |                      |
| Alavinejad et al. 2015                       | 42 NAFLD (33M, 9F)         | OP, Iran        |             |              |                          |                     |             |             | P      | Supp                         | Yes           |                              |                 | 30g/d dark chocolate (83% cocoa)<br><br>30g/d sugar-free white chocolate                           | NR                | Positive                    | 12 wk     | A, I                 |
|                                              | 21 NAFLD (15M, 6F)         |                 | 38.0 (10.3) | 88.6 (13.2)  | 30.3 (3.6)               |                     | 54.2 (41.3) | 39.0 (18.7) |        |                              |               | ~6.1 (1.2) <sup>f</sup>      | Dark chocolate  |                                                                                                    |                   |                             |           |                      |
| Control                                      | 21 NAFLD (18M, 3F)         |                 | 38.2 (11.0) | 84.9 (20.6)  | 29.7 (5.8)               | -                   | 39.6 (19.3) | 31.0 (11.2) |        |                              |               |                              | Fat             |                                                                                                    |                   |                             |           |                      |
| Subtraction Trials (Hypocaloric Comparisons) |                            |                 |             |              |                          |                     |             |             |        |                              |               |                              |                 |                                                                                                    |                   |                             |           |                      |
| SSB                                          |                            |                 |             |              |                          |                     |             |             |        |                              |               |                              |                 |                                                                                                    |                   |                             |           |                      |
| Campos et al. 2015 (G1)                      | 15 OW/OB (11M, 4F)         | OP, Switzerland | 29.1 (6.9)  |              |                          |                     |             |             | P      | Supp                         | Yes           |                              |                 |                                                                                                    |                   | Negative                    | 12 wk     | A                    |
|                                              | 8 OW/OB                    |                 |             | 102.2 (11.4) | 32.5 (4.5)               | 89.7 (31.1)mmol/L   | 38.6 (26.7) | 28.4 (8.8)  |        |                              |               |                              | NNS             | Replace SSB with NSB                                                                               | ~46:38:16         |                             |           |                      |
|                                              | 7 OW/OB                    |                 |             | 100.0 (12.4) | 33.8 (5.6)               | 189.7 (110.3)mmol/L | 41 (21.2)   | 30.1 (5.8)  |        |                              |               | 86.8 (~15)                   | Sucrose         | Habitual SSB consumption (>2 SSB/d)                                                                | ~51:34:15         |                             |           |                      |
| Control                                      |                            |                 |             |              |                          |                     |             |             |        |                              |               |                              |                 |                                                                                                    |                   |                             |           |                      |
| Campos et al. 2015 (G2)                      | 12 OW/OB (3M, 9F)          | OP, Switzerland | 28.3 (6.5)  |              |                          |                     |             |             | P      | Supp                         | Yes           |                              |                 |                                                                                                    |                   | Negative                    | 12 wk     | A                    |
|                                              | 6 OW/OB                    |                 |             | 85.6 (11.3)  | 30.1 (4.9)               | 17.5 (12.7)mmol/L   | 17.3 (4.7)  | 23.3 (13.7) |        |                              |               |                              | NNS             | Replace SSB with NSB                                                                               | ~46:38:16         |                             |           |                      |
| Control                                      | 6 OW/OB                    |                 |             | 78.5 (7.1)   | 26.9 (1.2)               | 13.4 (7.1)mmol/L    | 17.3 (8.1)  | 19.8 (4.7)  |        |                              |               | 86.8 (~15)                   | Sucrose         | Habitual SSB consumption (>2 SSB/d)                                                                | ~51:34:15         |                             |           |                      |

| Study, year                                  | Participants (M, F) | Setting     | Age, years* | Baseline    |                                       |               |            |            | Design | Feeding Control <sup>a</sup> | Randomization        | Dose, g/d (% E) <sup>b</sup> | Interventions                                                                                       | Food matrix                                                    | Diet <sup>c</sup> | Energy Balance <sup>d</sup> | Follow-up | Funding <sup>e</sup> |
|----------------------------------------------|---------------------|-------------|-------------|-------------|---------------------------------------|---------------|------------|------------|--------|------------------------------|----------------------|------------------------------|-----------------------------------------------------------------------------------------------------|----------------------------------------------------------------|-------------------|-----------------------------|-----------|----------------------|
|                                              |                     |             |             | BW, kg*     | BMI, kg/m <sup>2</sup> * <sup>a</sup> | IHCL (units)* | ALT (U/L)* | AST (U/L)* |        |                              |                      |                              |                                                                                                     |                                                                |                   |                             |           |                      |
| Mixed sources (with SSBs)                    |                     |             |             |             |                                       |               |            |            |        |                              |                      |                              |                                                                                                     |                                                                |                   |                             |           |                      |
| Porikos et al. 1983 (NonOB) Intervention     | 11 MW (11M, 0F)     | IP, USA     | (24-45)     | -           | -                                     | -             | -          | -          | C      | Met                          | No                   |                              | NNS                                                                                                 | Aspartame-sweetened foods<br>High sucrose diet (includes SSBs) | ~43:41:16         | Negative (ad libitum)       | 12 d      | A, I                 |
|                                              |                     |             |             |             |                                       |               |            |            |        |                              |                      |                              | Control                                                                                             |                                                                |                   |                             |           |                      |
| Porikos et al. 1983 (OB) Intervention        | 5 OW/OB (5M, 0F)    | IP, USA     | (24-45)     | -           | -                                     | -             | -          | -          | C      | Met                          | No                   |                              | NNS                                                                                                 | Aspartame-sweetened foods<br>High sucrose diet (includes SSBs) | ~46:39:15         | Negative (ad libitum)       | 12 d      | A, I                 |
|                                              |                     |             |             |             |                                       |               |            |            |        |                              |                      |                              | Control                                                                                             |                                                                |                   |                             |           |                      |
| Ad Libitum Trials (Free-Feeding Comparisons) |                     |             |             |             |                                       |               |            |            |        |                              |                      |                              |                                                                                                     |                                                                |                   |                             |           |                      |
| Mixed sources (with SSBs)                    |                     |             |             |             |                                       |               |            |            |        |                              |                      |                              |                                                                                                     |                                                                |                   |                             |           |                      |
| Mäkinen et al. 1976 (F) Intervention         | 92 MW (30M, 62F)    | OP, Finland | 27.7 (7.2)  |             |                                       |               |            |            | P      | Supp                         | Partial <sup>l</sup> | 70 (14)                      | Fructose                                                                                            | Ad libitum fructose-containing foods                           | NR                | Neutral                     | 22 mo     | NR                   |
|                                              | 38 MW (12M, 26F)    |             | 27.4 (4.4)  | 65.0 (15.4) | 21.4 (6.1)                            | -             | -          | -          |        |                              |                      |                              |                                                                                                     |                                                                |                   |                             |           |                      |
|                                              | 54 MW (18, 36F)     |             | 30.6 (9.9)  | 66.8 (14.3) | 21.5 (7.1)                            | -             | -          | -          |        |                              |                      |                              |                                                                                                     |                                                                |                   |                             |           |                      |
| Control                                      |                     |             |             |             |                                       |               |            |            |        |                              |                      | Sweetener                    | Ad libitum xylitol-containing foods, with avoidance to sweet fruits (dried figs, raisins and dates) |                                                                |                   |                             |           |                      |
| Mäkinen et al. 1976 (S) Intervention         | 89 MW (31M, 58F)    | OP, Finland | 27.7 (7.2)  |             |                                       |               |            |            | P      | Supp                         | Partial <sup>l</sup> | 73 (14.7)                    | Sucrose                                                                                             | Ad libitum sucrose-containing foods                            | NR                | Neutral                     | 22 mo     | NR                   |
|                                              | 35 MW (13M, 22F)    |             | 27.7 (5.8)  | 67.3 (13.2) | 23.0 (3.8)                            | -             | -          | -          |        |                              |                      |                              |                                                                                                     |                                                                |                   |                             |           |                      |
|                                              | 54 MW (18M, 36F)    |             | 30.6 (9.9)  | 66.8 (14.3) | 21.5 (7.1)                            | -             | -          | -          |        |                              |                      |                              |                                                                                                     |                                                                |                   |                             |           |                      |
| Control                                      |                     |             |             |             |                                       |               |            |            |        |                              |                      | Sweetener                    | Ad libitum xylitol-containing foods, with avoidance to sweet fruits (dried figs, raisins and dates) |                                                                |                   |                             |           |                      |

\*All values presented as mean ± SD, unless otherwise indicated.

<sup>a</sup> Metabolic feeding control included provision of all study foods, supplement feeding control included provision of study supplements only, and dietary advice included dietary counseling without the provision of any dietary foods or supplements.

<sup>b</sup> Doses preceded by "~" represent approximate amounts calculated on the basis of average body weight or energy intake reported by participants. In the absence of this data, an average of 70 kg body weight or 2000 kcal/d was assumed.

<sup>c</sup> Total energy intake in the form of carbohydrate:fat:protein.

<sup>d</sup> Positive energy balance included interventions designed to consume excess calories on top of a baseline diet. Negative energy balance included interventions designed to create a caloric deficit compared to the baseline diet. Neutral energy balance included interventions designed to continue habitual caloric intake.

<sup>e</sup> Agency funding included government, not-for profit health agencies or University sources.

<sup>f</sup> Z-scores reported for pediatric studies.

<sup>g</sup> Fructose-containing sugar dose estimated based on data from the Finland National Food Composition Database.

<sup>h</sup> Data based on baseline participants, including dropouts.

<sup>i</sup> Fructose-containing sugar dose estimated based on data from the Canadian Nutrient File.

<sup>j</sup> Fructose-containing sugar dose estimated based on data from United States Department of Agriculture (USDA) nutrient database.

<sup>k</sup> Fructose-containing sugar dose estimated from total daily caloric intake and sugar intake from study products.

<sup>l</sup> Half of the participants were assigned to groups according to personal preference, while the other half of the participants were randomly allocated.

%C=percent carbohydrate; %E=percentage of total energy intake; %F=percent fat; %P=percent protein; A=agency; AI=agency-industry; ALT=alanine aminotransferase; AST=aspartate aminotransferase; BB=bilberries; BW=body weight; C=crossover; CHO=carbohydrate; Cld=cloudy apple juice; Clr=clear apple juice; Ctrl=control; d=day; DA=dietary advice; DM2=type-2 diabetes mellitus; e=energy; F=female; g=grams; G1=group one; G2=group two; H=healthy;



HF=high fructose; hHFI=heterozygote high fructose intolerance; HS=high sucrose; HS-F=high sucrose frequency; HS-S=high sucrose size; I=industry; IHL=intrahepatic lipid; IHCL=intrahepatocellular lipid; kg=kilogram; LF=low fructose; M=men; Met=metabolically controlled; MF=medium fructose; NAFLD=non-alcoholic fatty liver disease; NNS=non-nutritive sweetener; NonOB=non-obese; NSB=non-nutritively-sweetened beverage; NR=not reported; OB=obese; ODM2=offspring of type-2 diabetes mellitus patients; OW=overweight; P=parallel; Pom=apple pomace; SAT=saturated fat; SB=sea buckthorn berries; SD=standard deviation; SSB=sugar-sweetened beverage; Supp=supplemented; T1=treatment group 1; T2=treatment group 2; UNSAT=unsaturated fat; W=women; wk=week.

**Supplementary Table S6: Sensitivity analyses of the use of correlation coefficients of 0.25 and 0.75 for crossover trials in the primary analysis of the effect of important food sources of fructose-containing sugars and NAFLD outcomes\***

| NAFLD Outcome                                                  | MD [95% CI], P <sub>MD</sub><br>I <sup>2</sup> , P <sub>Q</sub>                                 |                                                                                                 |                                                                                                     |
|----------------------------------------------------------------|-------------------------------------------------------------------------------------------------|-------------------------------------------------------------------------------------------------|-----------------------------------------------------------------------------------------------------|
|                                                                | Correlation Coefficient<br>used in the Primary Analysis                                         | Correlation Coefficient used in<br>Sensitivity Analyses                                         |                                                                                                     |
| Energy Design and Food<br>Source (N crossover<br>trials/total) | 0.5                                                                                             | 0.25                                                                                            | 0.75                                                                                                |
| <b>IHCL (SMD)</b>                                              |                                                                                                 |                                                                                                 |                                                                                                     |
| Substitution (5/16)*                                           | <b>0.36 [-0.07, 0.79], p<sub>MD</sub>=0.098<br/>I<sup>2</sup>=6.70%, p<sub>Q</sub>=0.377</b>    | <b>0.35 [-0.07, 0.76], p<sub>MD</sub>=0.101<br/>I<sup>2</sup>=1.37%, p<sub>Q</sub>=0.437</b>    | <b>0.39 [-0.07, 0.86], p<sub>MD</sub>=0.097<br/>I<sup>2</sup>=15.87%, p<sub>Q</sub>=0.272</b>       |
| Addition (6/13)**                                              | <b>1.72 [1.08, 2.36], p<sub>MD</sub>&lt;0.001<br/>I<sup>2</sup>=0.00%, p<sub>Q</sub>=0.943</b>  | <b>1.66 [1.04, 2.29], p<sub>MD</sub>&lt;0.001<br/>I<sup>2</sup>=0.00%, p<sub>Q</sub>=0.960</b>  | <b>1.79 [1.12, 2.45], p<sub>MD</sub>&lt;0.001<br/>I<sup>2</sup>=0.00%, p<sub>Q</sub>=0.893</b>      |
| SSB (6/13)**                                                   | 1.72 [1.08, 2.36], p <sub>MD</sub> <0.001<br>I <sup>2</sup> =0.00%, p <sub>Q</sub> =0.943       | 1.66 [1.04, 2.29], p <sub>MD</sub> <0.001<br>I <sup>2</sup> =0.00%, p <sub>Q</sub> =0.960       | 1.79 [1.12, 2.45], p <sub>MD</sub> <0.001<br>I <sup>2</sup> =0.00%, p <sub>Q</sub> =0.893           |
| Subtraction (0/2)                                              | <b>-0.52 [-1.60, 0.56], p<sub>MD</sub>=0.345<br/>I<sup>2</sup>=0.00%, p<sub>Q</sub>=0.470</b>   | NA                                                                                              | NA                                                                                                  |
| SSB (0/2)                                                      | -0.52 [-1.60, 0.56], p <sub>MD</sub> =0.345<br>I <sup>2</sup> =0.00%, p <sub>Q</sub> =0.470     | NA                                                                                              | NA                                                                                                  |
| <b>ALT (U/L)</b>                                               |                                                                                                 |                                                                                                 |                                                                                                     |
| Substitution (11/28)                                           | <b>-0.37 [-1.71, 0.97], p<sub>MD</sub>=0.589<br/>I<sup>2</sup>=52.64%, p<sub>Q</sub>=0.001</b>  | <b>-0.34 [-1.73, 1.05], p<sub>MD</sub>=0.634<br/>I<sup>2</sup>=51.34%, p<sub>Q</sub>=0.001</b>  | <b>-0.51 [-1.77, 0.75], p<sub>MD</sub>=0.430<br/>I<sup>2</sup>=54.51%, p<sub>Q</sub>&lt;0.001</b>   |
| Addition (16/31)                                               | <b>0.91 [-0.39, 2.12], p<sub>MD</sub>=0.169<br/>I<sup>2</sup>=31.44%, p<sub>Q</sub>=0.050</b>   | <b>0.96 [-0.38, 2.31], p<sub>MD</sub>=0.161<br/>I<sup>2</sup>=22.88%, p<sub>Q</sub>=0.128</b>   | <b>0.83 [-0.38, 2.04], p<sub>MD</sub>=0.177<br/>I<sup>2</sup>=44.19%, p<sub>Q</sub>=0.005</b>       |
| SSB (9/12)                                                     | 3.09 [0.49, 5.68], p <sub>MD</sub> =0.020<br>I <sup>2</sup> =58.18%, p <sub>Q</sub> =0.006      | 3.22 [0.58, 5.87], p <sub>MD</sub> =0.017<br>I <sup>2</sup> =50.97%, p <sub>Q</sub> =0.021      | 2.91 [0.39, 5.42], p <sub>MD</sub> =0.023<br>I <sup>2</sup> =68.05%, p <sub>Q</sub> <0.001          |
| 100% Fruit juice (4/7)                                         | -0.80 [-2.43, 0.84], p <sub>MD</sub> =0.340<br>I <sup>2</sup> =0.00%, p <sub>Q</sub> =0.949     | -0.84 [-2.78, 1.11], p <sub>MD</sub> =0.399<br>I <sup>2</sup> =0.00%, p <sub>Q</sub> =0.960     | -0.75 [-1.96, 0.46], p <sub>MD</sub> =0.224<br>I <sup>2</sup> =0.00%, p <sub>Q</sub> =0.908         |
| Fruit (3/4)                                                    | 0.44 [-2.22, 3.10], p <sub>MD</sub> =0.746<br>I <sup>2</sup> =0.00%, p <sub>Q</sub> =0.935      | 0.43 [-2.66, 3.53], p <sub>MD</sub> =0.784<br>I <sup>2</sup> =0.00%, p <sub>Q</sub> =0.962      | 0.43 [-1.60, 2.46], p <sub>MD</sub> =0.678<br>I <sup>2</sup> =0.00%, p <sub>Q</sub> =0.849          |
| Dried fruit (0/2)                                              | -2.58 [-17.46, 12.31], p <sub>MD</sub> =0.735<br>I <sup>2</sup> =0.00%, p <sub>Q</sub> =0.950   | NA                                                                                              | NA                                                                                                  |
| Honey (0/5)                                                    | -0.87 [-5.33, 5.60], p <sub>MD</sub> =0.703<br>I <sup>2</sup> =15.28%, p <sub>Q</sub> =0.317    | NA                                                                                              | NA                                                                                                  |
| Subtraction (2/4)                                              | <b>-4.86 [-15.91, 6.19], p<sub>MD</sub>=0.388<br/>I<sup>2</sup>=38.84%, p<sub>Q</sub>=0.179</b> | <b>-3.76 [-14.37, 6.85], p<sub>MD</sub>=0.487<br/>I<sup>2</sup>=30.20%, p<sub>Q</sub>=0.231</b> | <b>-6.01 [-17.24, 5.22], p<sub>MD</sub>=0.294<br/>I<sup>2</sup>=49.18%, p<sub>Q</sub>=0.116</b>     |
| SSB (0/2)                                                      | 1.33 [-7.55, 10.22], p <sub>MD</sub> =0.769<br>I <sup>2</sup> =15.31%, p <sub>Q</sub> =0.277    | NA                                                                                              | NA                                                                                                  |
| Mixed sources (with SSBs)<br>(2/2)                             | -15.68 [-32.90, 1.54], p <sub>MD</sub> =0.074<br>I <sup>2</sup> =0.00%, p <sub>Q</sub> =0.645   | -16.05 [-35.51, 3.40], p <sub>MD</sub> =0.106<br>I <sup>2</sup> =0.00%, p <sub>Q</sub> =0.688   | -39.15 [-58.89, -19.41],<br>p <sub>MD</sub> <0.001<br>I <sup>2</sup> =60.39%, p <sub>Q</sub> =0.112 |
| <i>Ad libitum</i> (0/2)                                        | <b>1.02 [-0.87, 2.92], p<sub>MD</sub>=0.290<br/>I<sup>2</sup>=0.00%, p<sub>Q</sub>=0.509</b>    | NA                                                                                              | NA                                                                                                  |
| Mixed sources (0/2)                                            | 1.02 [-0.87, 2.92], p <sub>MD</sub> =0.290<br>I <sup>2</sup> =0.00%, p <sub>Q</sub> =0.509      | NA                                                                                              | NA                                                                                                  |
| <b>AST (U/L)</b>                                               |                                                                                                 |                                                                                                 |                                                                                                     |
| Substitution (8/23)                                            | <b>0.39 [-0.87, 1.65], p<sub>MD</sub>=0.546<br/>I<sup>2</sup>=46.64%, p<sub>Q</sub>=0.008</b>   | <b>0.40 [-0.89, 1.68], p<sub>MD</sub>=0.546<br/>I<sup>2</sup>=43.98%, p<sub>Q</sub>=0.013</b>   | <b>0.36 [-0.86, 1.57], p<sub>MD</sub>=0.564<br/>I<sup>2</sup>=49.87%, p<sub>Q</sub>=0.004</b>       |
| Addition (7/21)                                                | <b>-0.03 [-0.82, 0.76], p<sub>MD</sub>=0.945<br/>I<sup>2</sup>=7.84%, p<sub>Q</sub>=0.357</b>   | <b>-0.03 [-0.68, 0.62], p<sub>MD</sub>=0.925<br/>I<sup>2</sup>=0.07%, p<sub>Q</sub>=0.457</b>   | <b>-0.19 [-1.03, 0.66], p<sub>MD</sub>=0.664<br/>I<sup>2</sup>=24.76%, p<sub>Q</sub>=0.147</b>      |
| SSB (6/9)                                                      | 0.29 [-1.07, 1.64], p <sub>MD</sub> =0.677<br>I <sup>2</sup> =31.62%, p <sub>Q</sub> =0.165     | 0.51 [-0.87, 1.88], p <sub>MD</sub> =0.473<br>I <sup>2</sup> =18.79%, p <sub>Q</sub> =0.276     | 0.03 [-1.27, 1.34], p <sub>MD</sub> =0.963<br>I <sup>2</sup> =51.46%, p <sub>Q</sub> =0.036         |
| 100% Fruit juice (0/3)                                         | 0.02 [-2.66, 2.71], p <sub>MD</sub> =0.986<br>I <sup>2</sup> =0.00%, p <sub>Q</sub> =0.491      | NA                                                                                              | NA                                                                                                  |
| Fruit (1/2)                                                    | -1.60 [-4.92, 1.72], p <sub>MD</sub> =0.346                                                     | -1.48 [-4.91, 1.95], p <sub>MD</sub> =0.397                                                     | -1.85 [-4.91, 1.21], p <sub>MD</sub> =0.236                                                         |

|                                           |                                                                                                                   |                                                                                                                  |                                                                                                                      |
|-------------------------------------------|-------------------------------------------------------------------------------------------------------------------|------------------------------------------------------------------------------------------------------------------|----------------------------------------------------------------------------------------------------------------------|
|                                           | $I^2=0.00\%$ , $p_Q=0.624$                                                                                        | $I^2=0.00\%$ , $p_Q=0.677$                                                                                       | $I^2=0.00\%$ , $p_Q=0.531$                                                                                           |
| Dried fruit (0/2)                         | -5.24 [-14.40, 3.93], $p_{MD}=0.263$<br>$I^2=0.00\%$ , $p_Q=0.606$                                                | NA                                                                                                               | NA                                                                                                                   |
| Sweets and desserts (/01)                 | -6.08 [-14.50, 2.34], $p_{MD}=0.157$<br>$I^2=.$ , $p_Q=.$                                                         | NA                                                                                                               | NA                                                                                                                   |
| Added nutritive (caloric) sweetener (0/4) | 1.05 [-4.04, 6.15], $p_{MD}=0.685$<br>$I^2=5.63\%$ , $p_Q=0.365$                                                  | NA                                                                                                               | NA                                                                                                                   |
| <b>Subtraction (2/4)</b>                  | <b>-5.18 [-8.60, -1.76], <math>p_{MD}=0.003</math></b><br><b><math>I^2=15.10\%</math>, <math>p_Q=0.316</math></b> | <b>-4.71 [-8.57, -0.85], <math>p_{MD}=0.017</math></b><br><b><math>I^2=0.00\%</math>, <math>p_Q=0.425</math></b> | <b>-5.88 [-8.62, -3.14], <math>p_{MD}&lt;0.001</math></b><br><b><math>I^2=43.46\%</math>, <math>p_Q=0.151</math></b> |
| SSB (0/2)                                 | -1.33 [-7.61, 4.96], $p_{MD}=0.679$<br>$I^2=0.00\%$ , $p_Q=0.867$                                                 | NA                                                                                                               | NA                                                                                                                   |
| Mixed sources (with SSBs) (2/2)           | -7.33 [-12.78, -1.87], $p_{MD}=0.009$<br>$I^2=31.00\%$ , $p_Q=0.229$                                              | -6.76 [-11.65, -1.87], $p_{MD}=0.007$<br>$I^2=0.00\%$ , $p_Q=0.322$                                              | -6.95 [-10.00, -3.90],<br>$p_{MD}<0.001$<br>$I^2=64.10\%$ , $p_Q=0.095$                                              |
| <b>Ad libitum (0/2)</b>                   | <b>-0.45 [-1.26, 0.36], <math>p_{MD}=0.278</math></b><br><b><math>I^2=0.00\%</math>, <math>p_Q=0.716</math></b>   | <b>NA</b>                                                                                                        | <b>NA</b>                                                                                                            |
| Mixed sources (with SSBs) (0/2)           | -0.45 [-1.26, 0.36], $p_{MD}=0.278$<br>$I^2=0.00\%$ , $p_Q=0.716$                                                 | NA                                                                                                               | NA                                                                                                                   |

\*Where there was a significant interaction by food source in addition trials and SSBs and mixed sources were the sole food sources in subtraction and ad libitum trials, sensitivity analysis was conducted for each food source.

ALT=alanine aminotransferase; AST=aspartate aminotransferase; IHCL=intrahepatocellular lipid; CI=confidence interval; MD=mean difference; NA=not available; no.=number; SMD=standardized mean difference.

**Supplementary Table S7: GRADE certainty of evidence assessment for the effect of fructose-containing sugars and NAFLD outcomes by levels of energy control**

| Outcome and trial (N) | Design                               | GRADE assessment      |                           |                            |                       |                    |                                     | Effect (MD or SMD [95% CI], P <sub>MD</sub> ) | Certainty of Evidence <sup>a</sup>    | Interpretation of magnitude of effect <sup>b</sup> |           |
|-----------------------|--------------------------------------|-----------------------|---------------------------|----------------------------|-----------------------|--------------------|-------------------------------------|-----------------------------------------------|---------------------------------------|----------------------------------------------------|-----------|
|                       |                                      | Downgrades            |                           |                            |                       |                    | Upgrades                            |                                               |                                       |                                                    |           |
|                       |                                      | Risk of bias          | Inconsistency             | Indirectness               | Imprecision           | Publication bias   | Dose response                       |                                               |                                       |                                                    |           |
| IHCL (SMD)*           |                                      |                       |                           |                            |                       |                    |                                     |                                               |                                       |                                                    |           |
| Substitution (16)     | Randomized and non-randomized trials | Not serious           | Not serious               | Not serious <sup>1</sup>   | Serious <sup>2</sup>  | None <sup>3</sup>  | None                                | ↔                                             | SMD 0.36 [-0.07 to 0.79], p=0.098     | ⊕⊕⊕○ Moderate                                      | No effect |
| Addition (13)         | Randomized and non-randomized trials | Not serious           | Not serious               | Very serious <sup>4</sup>  | Not serious           | None <sup>5</sup>  | None                                | ↑                                             | SMD 1.72 [1.08 to 2.36], p<0.001      | ⊕⊕○○ Low                                           | Large     |
| Subtraction (2)       | Randomized trials                    | Not serious           | Not serious               | Very serious <sup>6</sup>  | Serious <sup>7</sup>  | None <sup>8</sup>  | N/A <sup>9</sup>                    | ↔                                             | SMD -0.52 [-1.60 to 0.56], p=0.345    | ⊕○○○ Very low                                      | No effect |
| ALT (U/L)             |                                      |                       |                           |                            |                       |                    |                                     |                                               |                                       |                                                    |           |
| Substitution (28)     | Randomized and non-randomized trials | Not serious           | Not serious <sup>10</sup> | Not serious                | Not serious           | None <sup>11</sup> | None                                | ↔                                             | MD -0.37U/L [-1.71 to 0.97], p=0.589  | ⊕⊕⊕⊕ High                                          | No effect |
| Addition (31)         | Randomized and non-randomized trials | Not serious           | Not serious               | Very serious <sup>12</sup> | Not serious           | None               | Linear DR, no upgrade <sup>13</sup> | ↔                                             | MD 0.91U/L [-0.39 to 2.21], p=0.169   | ⊕⊕○○ Low                                           | No effect |
| Subtraction (4)       | Randomized trials                    | Not serious           | Not serious               | Very serious <sup>14</sup> | Serious <sup>15</sup> | None <sup>8</sup>  | N/A <sup>9</sup>                    | ↔                                             | MD -4.86U/L [-15.91 to 6.19], p=0.388 | ⊕○○○ Very low                                      | No effect |
| Ad libitum (2)        | Non-randomized trials                | Serious <sup>16</sup> | Not serious               | Very serious <sup>17</sup> | Serious <sup>18</sup> | None <sup>8</sup>  | N/A <sup>9</sup>                    | ↔                                             | MD 1.02U/L [-0.87 to 2.92], p=0.290   | ⊕○○○ Very low                                      | No effect |
| AST (U/L)             |                                      |                       |                           |                            |                       |                    |                                     |                                               |                                       |                                                    |           |
| Substitution (23)     | Randomized and non-randomized trials | Not serious           | Not serious               | Not serious                | Not serious           | None <sup>19</sup> | None                                | ↔                                             | MD 0.39U/L [-0.87 to 1.65], p=0.546   | ⊕⊕⊕⊕ High                                          | No effect |
| Addition (21)         | Randomized and non-randomized trials | Not serious           | Not serious               | Veryserious <sup>20</sup>  | Not serious           | None               | None                                | ↔                                             | MD -0.03U/L [-0.82 to 0.76], p=0.945  | ⊕⊕○○ Low                                           | No effect |
| Subtraction (4)       | Randomized trials                    | Not serious           | Not serious               | Very serious <sup>21</sup> | Serious <sup>22</sup> | None <sup>8</sup>  | N/A <sup>9</sup>                    | ↓                                             | MD -5.18U/L [-8.60 to -1.76], p=0.003 | ⊕○○○ Very low                                      | Moderate  |
| Ad libitum (2)        | Non-randomized trials                | Serious <sup>23</sup> | Not serious               | Very serious <sup>24</sup> | Not serious           | None <sup>8</sup>  | N/A <sup>9</sup>                    | ↔                                             | MD -0.45U/L [-1.26 to 0.36], p=0.278  | ⊕○○○ Very low                                      | No effect |

<sup>a</sup> Since all included trials were randomized or non-randomized controlled trials, the certainty of the evidence was graded as high for all outcomes by default and then downgraded or upgraded based on pre-specified criteria. Criteria for downgrades included risk of bias (downgraded if the majority of trials were considered to be at high risk of bias); inconsistency (downgraded if there was substantial unexplained heterogeneity [ $I^2 \geq 50\%$ ,  $p < 0.10$ ]; indirectness (downgraded if there were factors absent or present relating to the participants, interventions, or outcomes that limited the generalizability of the results); imprecision (downgraded if the 95% confidence interval crossed the minimally important difference [MID] for harm or benefit set at 0.26 for IHCL, 2.85U/L for ALT(2), and 2.55U/L for AST(2)); and publication bias (downgraded if there is evidence of publication bias based on funnel plot asymmetry and/or significant Egger's or Begg's tests ( $P < 0.10$ ) with confirmation by adjustment by Duval and Tweedie trim-and-fill analysis). Criteria for upgrades included a significant dose-response gradient.

<sup>b</sup> For the interpretation of the magnitude, we used the MIDs (see above) to assess the importance of magnitude of our pooled estimates using the effect size categories according to new GRADE guidance. We then used the MIDs to assess the importance of the magnitude of our point estimates using the effect size categories according to GRADE guidance (3-5) as follows: large effect ( $\geq 5 \times$  MID); moderate effect ( $\geq 2 \times$  MID); small important effect ( $\geq 1 \times$  MID); and trivial/unimportant effect ( $< 1$  MID).

\*To convert SMD to %liver fat, multiply the SMD by the baseline pooled standard deviation, 0.71%.

<sup>1</sup> Although the effect seen in substitution trials for total fructose-containing sugars was mainly driven from SSBs, which contributed 52.2% of the weight in the overall analysis, we did not double downgrade for very serious indirectness since there was no evidence for interaction by food source ( $p = 0.665$ ) and the removal of SSBs did not lead to a change in the overall estimate of effect (SMD = 0.63 [95% CI, -0.11 to 1.38],  $p_{\text{SMD}} = 0.10$ ).

<sup>2</sup> Downgrade for serious imprecision as the 95% confidence interval (-0.07 to 0.79) overlaps the MID of clinically important harm for IHCL (0.26).

<sup>3</sup> Although a significant publication bias was detected at  $p = 0.001$  and  $p = 0.001$  in Begg's and Egger's tests, respectfully, we did not downgrade for publication bias as the imputation of 6 trials from trim-and-fill analyses did not change the significance on the overall effect of IHCL (SMD = -0.00 [95% CI, -0.49 to 0.48]).

<sup>4</sup> Double downgrade for very serious indirectness as the only food source available for analyses was SSBs, thus limiting the ability to assess differences in food sources.

<sup>5</sup> Although a significant publication bias was detected at  $p < 0.001$  and  $p = 0.021$  in Begg's and Egger's tests, respectfully, we did not downgrade for publication bias as the imputation of 4 trials from trim-and-fill analyses did not change the significance on the overall effect of IHCL (SMD = 1.49 [95% CI, 0.90 to 2.09]).

<sup>6</sup> Double downgrade for very serious indirectness as the only food source available for analyses was SSBs, thus limiting the ability to assess differences in food sources.

<sup>7</sup> Downgrade for serious imprecision as the 95% confidence interval (-1.60 to 0.56) overlaps the MID of clinically important benefit and harm for IHCL (0.26).

<sup>8</sup> No downgrade for publication bias, as publication bias could not be assessed due to lack of power for assessing funnel plot asymmetry and small study effects ( $< 10$  trial comparisons included in the meta-analysis).

<sup>9</sup> No dose-response assessment was made as  $< 6$  trials were available for analyses.

<sup>10</sup> Although there was substantial heterogeneity in the analysis, we did not downgrade for serious inconsistency, since it was explained when studies by Lehtonen et al. 2010, Purkins et al. 2004, and Schwimmer et al. 2019 were individually removed as part of *a priori* sensitivity analyses (Original:  $I^2 = 53\%$ ,  $P_Q = 0.001$ ; after the removal of Lehtonen et al. 2010:  $I^2 = 45\%$ ,  $P_Q = 0.007$ ; after the removal of Purkins et al. 2004:  $I^2 = 37\%$ ,  $P_Q = 0.028$ ; and after removal of after the removal of Schwimmer et al. 2019:  $I^2 = 41\%$ ,  $P_Q = 0.016$ ).

<sup>11</sup> Although a significant publication bias was detected at  $p = 0.066$  and  $p = 0.008$  in Begg's and Egger's test, respectfully, we did not downgrade for publication bias as the imputation of 3 trials from trim-and-fill analyses did not change the significance on the overall effect of ALT (MD = -0.71U/L [95% CI, -2.31 to 0.89]).

<sup>12</sup> Double downgrade for very serious indirectness. Although there was no evidence for interaction by food source ( $p = 0.159$ ), there was one food source (SSBs) which contributed the majority (42.2%) of the weight in the overall analysis, thus limiting the ability to assess differences in food sources.

<sup>13</sup> Although a significant dose response was detected (coef<sub>linear</sub> = 0.153 [95% CI, 0.035 to 0.271],  $p_{\text{linear}} = 0.011$ ), we did not upgrade for dose response as we assessed that there was an influence by food source.

<sup>14</sup> Double downgrade for very serious indirectness as there was a significant interaction by food source ( $p=0.061$ ) indicating that there is biological plausibility of differences in behaviour of foods due to the food matrices and since SSBs and mixed sources were the only food sources available for analyses, thus limiting the ability to assess differences in food sources.

<sup>15</sup> Downgrade for serious imprecision as the 95% confidence interval (-15.91 to 6.19) overlaps the MIDs of clinically important harm, benefit, and the no effect line for ALT (2.85U/L).

<sup>16</sup> Downgrade for serious risk of bias as we detected “High” risk of bias ratings for all trials under the domains of sequence generation and allocation concealment, due to the fact that they were not randomized.

<sup>17</sup> Double downgrade for very serious indirectness as SSBs was the only one food source available for analyses, thus limiting the ability to assess differences in food sources and only two trial comparisons were available and were conducted in Finland with healthy young adult participants, which leads to poor applicability of results to the general population.

<sup>18</sup> Downgrade for serious imprecision as the 95% confidence interval (-0.87 to 2.92) overlaps the MIDs of clinically important harm and the no effect line for ALT (2.85U/L).

<sup>19</sup> Although a significant publication bias was detected at  $p=0.027$  and  $p=0.019$  in Begg’s and Egger’s tests, respectfully, we did not downgrade for publication bias as the imputation of 1 trial from trim-and-fill analyses did not change the significance on the overall effect of AST (MD= 0.22U/L [95% CI, -1.72 to 1.29],  $p_{MD}=0.778$ ).

<sup>20</sup> Double downgrade for very serious indirectness as there was a significant interaction by food source ( $p=0.007$ ) indicating that there is biological plausibility of differences in behaviour of foods due to the food matrices and since SSBs and mixed sources were the only food sources available for analyses, thus limiting the ability to assess differences in food sources.

<sup>21</sup> Double downgrade for very serious indirectness as only one food source was available for analyses, thus limiting the ability to assess differences in food sources. Further, only two trial comparisons were available and were conducted in Switzerland, with overweight or obese adult participants with a small sample size ( $n=27$ ), which leads to poor applicability of results to the general population.

<sup>22</sup> Downgrade for serious imprecision as the 95% confidence interval (-8.60 to -1.76) overlaps the MIDs of clinically important harm, benefit, and the no effect line for ALT (2.85U/L).

<sup>22</sup> Downgrade for serious ROB since the overall pooled estimate was driven by high ROB trials. All trials under the domains of sequence generation and allocation concealment were rated as high risk of bias since they were not randomized.

<sup>24</sup> Double downgrade for very serious indirectness as SSBs was the only one food source available for analyses, thus limiting the ability to assess differences in food sources. Further, only two trial comparisons were available and were conducted in Finland with healthy young adult participants, which leads to poor applicability of results to the general population.

ALT=alanine aminotransferase; AST=aspartate aminotransferase; CI=confidence interval; DR=dose response; IHCL=intrahepatocellular lipid; MD=mean difference; MID=minimally important difference; SSB=sugar-sweetened beverage.

**Supplementary Table S8: GRADE certainty of evidence assessment for the effect of fructose-containing sugars and NAFLD outcomes by important food source of fructose-containing sugars**

| Outcome and trial (N)                 | Design                               | GRADE assessment      |                           |                       |                       |                   |                  | Effect (MD or SMD [95% CI], P <sub>MD</sub> ) | Certainty of Evidence <sup>a</sup>     | Interpretation of magnitude of effect <sup>b</sup> |                 |
|---------------------------------------|--------------------------------------|-----------------------|---------------------------|-----------------------|-----------------------|-------------------|------------------|-----------------------------------------------|----------------------------------------|----------------------------------------------------|-----------------|
|                                       |                                      | Downgrades            |                           |                       |                       |                   | Upgrades         |                                               |                                        |                                                    |                 |
|                                       |                                      | Risk of bias          | Inconsistency             | Indirectness          | Imprecision           | Publication bias  | Dose response    |                                               |                                        |                                                    |                 |
| IHCL in addition trials (SMD)*        |                                      |                       |                           |                       |                       |                   |                  |                                               |                                        |                                                    |                 |
| SSB (13)                              | Randomized and non-randomized trials | Not serious           | Not serious               | Not serious           | Not serious           | None <sup>1</sup> | None             | ↑                                             | SMD 1.72 [1.08 to 2.36], p<0.001       | ⊕⊕⊕⊕ High                                          | Large           |
| IHCL in subtraction trials (SMD)*     |                                      |                       |                           |                       |                       |                   |                  |                                               |                                        |                                                    |                 |
| SSB (2)                               | Randomized trials                    | Not serious           | Not serious               | Serious <sup>2</sup>  | Serious <sup>3</sup>  | None <sup>4</sup> | N/A <sup>5</sup> | ↔                                             | SMD -0.52 [-1.60 to 0.56], p=0.345     | ⊕⊕○○ Low                                           | No effect       |
| ALT in addition trials (U/L)          |                                      |                       |                           |                       |                       |                   |                  |                                               |                                        |                                                    |                 |
| SSB (12)                              | Randomized and non-randomized trials | Not serious           | Not serious               | Not serious           | Serious <sup>6</sup>  | None <sup>4</sup> | None             | ↔                                             | MD 3.09U/L [0.49 to 5.68], p=0.020     | ⊕⊕⊕○ Moderate                                      | Small important |
| 100% Fruit juice (7)                  | Randomized trials                    | Not serious           | Not serious               | Serious <sup>7</sup>  | Not serious           | None <sup>4</sup> | None             | ↔                                             | MD -0.80U/L [-2.43 to 0.84], p=0.340   | ⊕⊕⊕○ Moderate                                      | No effect       |
| Fruit (4)                             | Randomized trials                    | Not serious           | Not serious               | Serious <sup>8</sup>  | Serious <sup>9</sup>  | None <sup>4</sup> | N/A <sup>5</sup> | ↔                                             | MD 0.44U/L [-2.22 to 3.10], p=0.746    | ⊕⊕○○ Low                                           | No effect       |
| Dried fruit (2)                       | Randomized trials                    | Not serious           | Not serious               | Serious <sup>10</sup> | Serious <sup>11</sup> | None <sup>4</sup> | N/A <sup>5</sup> | ↔                                             | MD -2.58U/L [-17.46 to 12.31], p=0.735 | ⊕⊕○○ Low                                           | No effect       |
| Sweets and desserts (1)               | Randomized trials                    | Not serious           | Not serious <sup>12</sup> | Serious <sup>13</sup> | Serious <sup>14</sup> | None <sup>4</sup> | N/A <sup>5</sup> | ↔                                             | MD -2.15U/L [-20.93 to 16.63], p=0.822 | ⊕⊕○○ Low                                           | No effect       |
| Honey (5)                             | Randomized trials                    | Not serious           | Not serious               | Serious <sup>15</sup> | Not serious           | None <sup>4</sup> | N/A <sup>5</sup> | ↔                                             | MD -0.87U/L [-5.33 to 3.60], p=0.703   | ⊕⊕⊕○ Moderate                                      | No effect       |
| ALT subtraction trials (U/L)          |                                      |                       |                           |                       |                       |                   |                  |                                               |                                        |                                                    |                 |
| SSB (2)                               | Randomized trials                    | Not serious           | Not serious               | Not serious           | Serious <sup>16</sup> | None <sup>4</sup> | N/A <sup>5</sup> | ↔                                             | MD 1.33U/L [-7.55 to 10.22], p=0.769   | ⊕⊕⊕○ Moderate                                      | No effect       |
| Mixed sources (2)                     | Non-randomized trials                | Serious <sup>17</sup> | Not serious               | Serious <sup>18</sup> | Serious <sup>19</sup> | None <sup>4</sup> | N/A <sup>5</sup> | ↔                                             | MD -15.68U/L [-32.90 to 1.54], p=0.074 | ⊕○○○ Very low                                      | No effect       |
| ALT in <i>ad libitum</i> trials (U/L) |                                      |                       |                           |                       |                       |                   |                  |                                               |                                        |                                                    |                 |

|                                              |                                      |                       |                           |                       |                       |                   |                  |                                          |               |           |
|----------------------------------------------|--------------------------------------|-----------------------|---------------------------|-----------------------|-----------------------|-------------------|------------------|------------------------------------------|---------------|-----------|
| Mixed sources (2)                            | Non-randomized trials                | Serious <sup>20</sup> | Not serious               | Serious <sup>21</sup> | Serious <sup>22</sup> | None <sup>4</sup> | N/A <sup>5</sup> | ↔ MD 1.02U/L [-0.87 to 2.92], p=0.290    | ⊕○○○ Very low | No effect |
| <b>AST in addition trials (U/L)</b>          |                                      |                       |                           |                       |                       |                   |                  |                                          |               |           |
| SSB (9)                                      | Randomized and non-randomized trials | Not serious           | Not serious               | Not serious           | Not serious           | None <sup>4</sup> | None             | ↔ MD 0.29U/L [-1.07 to 1.64], p=0.677    | ⊕⊕⊕⊕ High     | No effect |
| 100% Fruit juice (3)                         | Randomized trials                    | Not serious           | Not serious               | Not serious           | Serious <sup>23</sup> | None <sup>4</sup> | N/A <sup>5</sup> | ↔ MD 0.02U/L [-2.66 to 2.71], p=0.986    | ⊕⊕⊕○ Moderate | No effect |
| Fruit (2)                                    | Randomized trials                    | Not serious           | Not serious               | Not serious           | Serious <sup>24</sup> | None <sup>4</sup> | N/A <sup>5</sup> | ↔ MD -1.60U/L [-4.92 to 1.72], p=0.346   | ⊕⊕⊕○ Moderate | No effect |
| Dried fruit (2)                              | Randomized trials                    | Not serious           | Not serious               | Not serious           | Serious <sup>25</sup> | None <sup>4</sup> | N/A <sup>5</sup> | ↔ MD -5.24U/L [-14.40 to 3.93], p=0.263  | ⊕⊕⊕○ Moderate | No effect |
| Sweets and desserts (1)                      | Randomized trials                    | Not serious           | Not serious <sup>26</sup> | Serious <sup>27</sup> | Serious <sup>28</sup> | None <sup>4</sup> | N/A <sup>5</sup> | ↔ MD -6.08U/L [-14.50 to 2.34], p=0.157  | ⊕⊕○○ Low      | No effect |
| Honey (4)                                    | Randomized trials                    | Not serious           | Not serious               | Not serious           | Serious <sup>29</sup> | None <sup>4</sup> | N/A <sup>5</sup> | ↔ MD 1.05U/L [-4.04 to 6.15], p=0.685    | ⊕⊕⊕○ Moderate | No effect |
| <b>AST in subtraction trials (U/L)</b>       |                                      |                       |                           |                       |                       |                   |                  |                                          |               |           |
| SSB (2)                                      | Randomized trials                    | Not serious           | Not serious               | Serious <sup>30</sup> | Serious <sup>31</sup> | None <sup>4</sup> | N/A <sup>5</sup> | ↔ MD -1.33U/L [-7.61 to 4.96], p=0.679   | ⊕⊕○○ Low      | No effect |
| Mixed sources (2)                            | Non-randomized trials                | Serious <sup>32</sup> | Not serious               | Serious <sup>33</sup> | Not serious           | None <sup>4</sup> | N/A <sup>5</sup> | ↓ MD -7.33U/L [-12.78 to -1.87], p=0.009 | ⊕⊕○○ Low      | Moderate  |
| <b>AST in <i>ad libitum</i> trials (U/L)</b> |                                      |                       |                           |                       |                       |                   |                  |                                          |               |           |
| Mixed sources (2)                            | Non-randomized trials                | Serious <sup>34</sup> | Not serious               | Serious <sup>35</sup> | Not serious           | None <sup>4</sup> | N/A <sup>5</sup> | ↔ MD -0.45U/L [-1.11 to 0.21], p=0.183   | ⊕⊕○○ Low      | No effect |

<sup>a</sup> Since all included trials were randomized or non-randomized controlled trials, the certainty of the evidence was graded as high for all outcomes by default and then downgraded or upgraded based on pre-specified criteria. Criteria for downgrades included risk of bias (downgraded if the majority of trials were considered to be at high risk of bias); inconsistency (downgraded if there was substantial unexplained heterogeneity [ $I^2 \geq 50\%$ ,  $p < 0.10$ ]; indirectness (downgraded if there were factors absent or present relating to the participants, interventions, or outcomes that limited the generalizability of the results); imprecision (downgraded if the 95% confidence interval crossed the minimally important difference [MID] for harm or benefit set at 0.26 for IHCL, 2.85U/L for ALT(2), and 2.55U/L for AST(2)); and publication bias (downgraded if there is evidence of publication bias based on funnel plot asymmetry and/or significant Egger's or Begg's tests ( $P < 0.10$ ) with confirmation by adjustment by Duval and Tweedie trim-and-fill analysis). Criteria for upgrades included a significant dose-response gradient.

<sup>b</sup> For the interpretation of the magnitude, we used the MIDs (see above) to assess the importance of magnitude of our pooled estimates using the effect size categories according to new GRADE guidance. We then used the MIDs to assess the importance of the magnitude of our point estimates using the effect size categories according to GRADE guidance (3-5) as follows: large effect ( $\geq 5 \times$  MID); moderate effect ( $\geq 2 \times$  MID); small important effect ( $\geq 1 \times$  MID); and trivial/unimportant effect ( $< 1$  MID).

\*To convert SMD to %liver fat, multiply the SMD by the baseline pooled standard deviation, 0.71%.



- <sup>1</sup> Although a significant publication bias was detected at  $p < 0.001$  and  $p = 0.021$  in Begg's and Egger's tests, respectfully, we did not downgrade for publication bias as the imputation of 4 trials from trim-and-fill analyses did not change the significance on the overall effect of IHCL (SMD=1.49 [0.90 to 2.09]).
- <sup>2</sup> Downgrade for serious indirectness as only two trial comparisons were available and were conducted in Switzerland, with overweight or obese adult participants with a small sample size ( $n=27$ ), which leads to poor applicability of results to the general population.
- <sup>3</sup> Downgrade for serious imprecision as the 95% confidence interval (-1.60 to 0.56) overlaps the MIDs of clinically important harm, benefit, and the no effect line for IHCL (0.26).
- <sup>4</sup> No downgrade for publication bias, as publication bias could not be assessed due to lack of power for assessing funnel plot asymmetry and small study effects ( $<10$  trial comparisons included in the meta-analysis).
- <sup>5</sup> No dose-response assessment was made as  $<6$  trials were available for analyses.
- <sup>6</sup> Downgrade for serious imprecision as the 95% confidence interval (2.63 to 8.00) overlaps the MIDs of clinically important harm for ALT (2.85U/L).
- <sup>7</sup> Downgrade for serious indirectness as all trial comparisons included healthy mixed weight adult participants which leads to poor applicability of the results to the general population.
- <sup>8</sup> Downgrade for serious indirectness as three trial comparisons had a small sample size and included participants who were healthy ( $n=23$ ) or had diabetes ( $n=22$ ) which leads to poor applicability of the results to the general population.
- <sup>9</sup> Downgrade for serious imprecision as the 95% confidence interval (-2.43 to 3.40) overlaps the MID of clinically important harm and the no effect line for ALT (2.85U/L).
- <sup>10</sup> Downgrade for serious indirectness as trial comparisons had a small sample size and included adult participants who were healthy ( $n=70$ ) or had diabetes ( $n=72$ ) which leads to poor applicability of the results to the general population.
- <sup>11</sup> Downgrade for serious imprecision as the 95% confidence interval (-7.06 to 3.35) overlaps the MIDs of clinically important harm and the no effect line for ALT (2.85U/L).
- <sup>12</sup> We did not downgrade for serious inconsistency as  $\leq 2$  trials were included in the meta-analysis and we were thus unable to test for asymmetry.
- <sup>13</sup> Downgrade for serious indirectness as only one trial comparison was included and had a small sample size ( $n=42$ ) and included participants with NAFLD which leads to poor applicability of the results to the general population.
- <sup>14</sup> Downgrade for serious imprecision as the 95% confidence interval (-20.93 to 16.63) overlaps the MIDs of clinically important harm and the no effect line for ALT (2.85U/L).
- <sup>15</sup> Downgrade for serious indirectness as only five trial comparisons were included and included older adult participants with HIV ( $n=164$ ), breast cancer ( $n=72$ ), or diabetes ( $n=48$ ), which leads to poor applicability of the results to the general population.
- <sup>16</sup> Downgrade for serious imprecision as the 95% confidence interval (-7.55 to 10.22) overlaps the MIDs of clinically important harm, benefit, and the no effect line for ALT (2.85U/L).
- <sup>17</sup> Downgrade for serious risk of bias as we detected "High" risk of bias ratings for all trials under the domains of sequence generation, allocation concealment, and other risk of bias, since they were not randomized and the crossover trials did not include a washout period.
- <sup>18</sup> Downgrade for serious indirectness as trial comparisons had a small sample size and included adult participants who were mixed weight ( $n=11$ ) or obese ( $n=11$ ) which leads to poor applicability of the results to the general population.
- <sup>19</sup> Downgrade for serious imprecision as the 95% confidence interval (-32.90 to 1.54) overlaps the MIDs of clinically important benefit and the no effect line for ALT (2.85U/L).
- <sup>20</sup> Downgrade for serious risk of bias as we detected "High" risk of bias ratings for all trials under the domains of sequence generation and allocation concealment, due to the fact that they were not randomized.
- <sup>21</sup> Downgrade for serious indirectness as only two trial comparisons were available and were conducted in Finland with healthy young adult participants ( $n=100$ ), which leads to poor applicability of results to the general population.

- <sup>22</sup> Downgrade for serious imprecision as the 95% confidence interval (-0.87 to 2.92) overlaps the MID of clinically important harm and the no effect line for ALT (2.85U/L).
- <sup>23</sup> Downgrade for serious imprecision as the 95% confidence interval (-2.66 to 2.71) overlaps the MID of clinically important harm, benefit, and the no effect line for AST (2.55U/L).
- <sup>24</sup> Downgrade for serious imprecision as the 95% confidence interval (-4.92 to 1.72) overlaps the MID of clinically important harm, benefit, and the no effect line for AST (2.55U/L).
- <sup>25</sup> Downgrade for serious imprecision as the 95% confidence interval (-14.40 to 3.93) overlaps the MID of clinically important harm, benefit, and the no effect line for AST (2.55U/L).
- <sup>26</sup> We did not downgrade for serious inconsistency as  $\leq 2$  trials were included in the meta-analysis and we were thus unable to test for asymmetry.
- <sup>27</sup> Downgrade for serious indirectness as only one trial comparison was available and was conducted in Sweden, which included a small sample size (N=42) of adult participants with NAFLD, which leads to poor applicability of results to the general population.
- <sup>28</sup> Downgrade for serious imprecision as the 95% confidence interval (-14.50 to 2.34) overlaps the MID of clinically important harm, benefit, and the no effect line for AST (2.55U/L).
- <sup>29</sup> Downgrade for serious imprecision as the 95% confidence interval (-4.04 to 6.15) overlaps the MID of clinically important harm, benefit, and the no effect line for AST (2.55U/L).
- <sup>30</sup> Downgrade for serious indirectness as only two trial comparisons were available and were conducted in Switzerland, with overweight or obese adult participants with a small sample size (n=27), which leads to poor applicability of results to the general population.
- <sup>31</sup> Downgrade for serious imprecision as the 95% confidence interval (-7.61 to 4.96) overlaps the MID of clinically important harm and the no effect line for AST (2.55U/L).
- <sup>32</sup> Downgrade for serious risk of bias as we detected “High” risk of bias ratings for all trials under the domains of sequence generation, allocation concealment, and other risk of bias, since they were not randomized and the crossover trials did not include a washout period.
- <sup>33</sup> Downgrade for serious indirectness as trial comparisons had a small sample size and included adult participants who were mixed weight (n=11) or obese (n=11) which leads to poor applicability of the results to the general population.
- <sup>34</sup> Downgrade for serious risk of bias as we detected “High” risk of bias ratings for all trials under the domains of sequence generation and allocation concealment, due to the fact that they were not randomized.
- <sup>35</sup> Downgrade for serious indirectness as only two trial comparisons were available and were conducted in Finland with healthy young adult participants (n=100), which leads to poor applicability of results to the general population.
- ALT=alanine aminotransferase; AST=aspartate aminotransferase; CI=confidence interval; DR=dose response; IHCL=intrahepatocellular lipid; MD=mean difference; MID=minimally important difference; NAFLD=non-alcoholic fatty liver disease; SSB=sugar-sweetened beverage.

**Supplementary Table S9: Potential mechanisms to explain the effect of food sources of fructose-containing sugars and non-alcoholic fatty liver disease**

| Potential mechanism                                                                                | Description                                                                                                                                                                                                                                                                                                                                                                                                                                                                                                                                                                                                                                                                                                                                                                                                                                                                                                                                                                                                                                                                                                                                                                                                                                                                                                                                                                                                                                                                                                                                                                                                                                                                                                                 | References                                                                                                                                                                                                                                                                                                                                                                                                                                                                                                                                                                                                                                                                                                                                                                                                                                                                                                                                                                                                                                                                                                                                                                                                                                                                                                                                                                                                                                                                                  |
|----------------------------------------------------------------------------------------------------|-----------------------------------------------------------------------------------------------------------------------------------------------------------------------------------------------------------------------------------------------------------------------------------------------------------------------------------------------------------------------------------------------------------------------------------------------------------------------------------------------------------------------------------------------------------------------------------------------------------------------------------------------------------------------------------------------------------------------------------------------------------------------------------------------------------------------------------------------------------------------------------------------------------------------------------------------------------------------------------------------------------------------------------------------------------------------------------------------------------------------------------------------------------------------------------------------------------------------------------------------------------------------------------------------------------------------------------------------------------------------------------------------------------------------------------------------------------------------------------------------------------------------------------------------------------------------------------------------------------------------------------------------------------------------------------------------------------------------------|---------------------------------------------------------------------------------------------------------------------------------------------------------------------------------------------------------------------------------------------------------------------------------------------------------------------------------------------------------------------------------------------------------------------------------------------------------------------------------------------------------------------------------------------------------------------------------------------------------------------------------------------------------------------------------------------------------------------------------------------------------------------------------------------------------------------------------------------------------------------------------------------------------------------------------------------------------------------------------------------------------------------------------------------------------------------------------------------------------------------------------------------------------------------------------------------------------------------------------------------------------------------------------------------------------------------------------------------------------------------------------------------------------------------------------------------------------------------------------------------|
| SSBs consumed as excess calories stimulate disruptions in hepatic fatty acid metabolism            | An increase in NAFLD measurements as a result of the consumption of fructose-containing sugars coming from SSBs could be explained when fructose is consumed as excess energy, which can stimulate liver fat accumulation by influencing hepatic de novo lipogenesis and inhibiting beta-oxidation. <sup>1</sup> Additionally, metabolizing high amounts of fructose depletes ATP levels, resulting in an accumulation of uric acid, which can disrupt fatty acid metabolism and contribute to NAFLD progression. <sup>1</sup>                                                                                                                                                                                                                                                                                                                                                                                                                                                                                                                                                                                                                                                                                                                                                                                                                                                                                                                                                                                                                                                                                                                                                                                              | 1. Jensen T, Abdelmalek MF, Sullivan S, et al. Fructose and sugar: A major mediator of non-alcoholic fatty liver disease. <i>J Hepatol</i> 2018; 68(5): 1063-75.                                                                                                                                                                                                                                                                                                                                                                                                                                                                                                                                                                                                                                                                                                                                                                                                                                                                                                                                                                                                                                                                                                                                                                                                                                                                                                                            |
| The different food matrices/forms of food sources of fructose-containing sugars and NAFLD outcomes | The various effects of different food sources of fructose-containing sugars on NAFLD markers could be explained by its food matrix/form. SSBs contain few nutrients and are the leading contributors to the consumption of added sugars in the diet. <sup>2</sup> Furthermore, SSBs may not induce compensatory eating behaviours to reduce energy intake in subsequent meals. <sup>3</sup> Thus, the consumption of SSBs may result in excessive energy intake and contribute to NAFLD development. <sup>4</sup> By contrast, other food sources such as fruits are dense in nutrients which may offset the effect of fructose-containing sugars. <sup>4</sup> Nutrients in fruit including fibre has been shown to aid in maintaining blood glucose, insulin, and free fatty acid levels in NAFLD patients, while phytochemicals and antioxidants may be protective of hepatic steatosis. <sup>1,5</sup> One randomized controlled trial conducted in Thailand <sup>6</sup> of 10 female participants with type 1 diabetes followed for four weeks has shown that a low glycemic index (GI) diet reduced levels of ALT compared to a high GI diet, and another quasi-randomized controlled trial in Israel <sup>7</sup> of 128 middle-aged adults with obesity and diabetes followed for 12 months showed that a low glycemic load (GL) Mediterranean diet had ~28% lower levels of ALT compared to the standard of care American Diabetes Association (ADA) diet (14.4 ±1.7 U/L in the low GL diet and 19.8 ±1.4 in the ADA diet, p<0.001). The harmful effect found in mixed sources for AST may be explained by SSBs being included in the dietary intervention, which would thus contribute to increasing AST levels. | 2. Ludwig DS, Peterson KE, Gortmaker SL. Relation between consumption of sugar-sweetened drinks and childhood obesity: a prospective, observational analysis. <i>Lancet</i> (London, England) 2001; 357(9255): 505-8.<br>3. Choo VL, Vigiouliou E, Blanco Mejia S, et al. Food sources of fructose-containing sugars and glycaemic control: systematic review and meta-analysis of controlled intervention studies. <i>BMJ</i> 2018; 363: k4644.<br>4. Mirmiran P, Amirhamidi Z, Ejtahed HS, Bahadoran Z, Azizi F. Relationship between Diet and Non-alcoholic Fatty Liver Disease: A Review Article. <i>Iran J Public Health</i> 2017; 46(8): 1007-17<br>5. George ES, Forsyth A, Itsiopoulos C, et al. Practical Dietary Recommendations for the Prevention and Management of Nonalcoholic Fatty Liver Disease in Adults. <i>Adv Nutr</i> (Bethesda) 2018; 9(1): 30-40.<br>6. Komindr S, Ingsriswang S, Lerdvuthisophon N, Boontawe A. Effect of long-term intake of Asian food with different glycemic indices on diabetic control and protein conservation in type 2 diabetic patients. <i>Journal of the Medical Association of Thailand = Chotmaihet thangphaet</i> 2001; 84: 85-97.<br>7. Fraser A, Abel R, Lawlor DA, Fraser D, Elhayany A. A modified Mediterranean diet is associated with the greatest reduction in alanine aminotransferase levels in obese type 2 diabetes patients: results of a quasi-randomised controlled trial. <i>Diabetologia</i> 2008; 51(9): 1616-22. |
| Subtraction trials resulted in no effect on NAFLD outcomes due to energy compensation              | Although a beneficial effect on AST was seen from the subtraction trials in which energy from fructose-containing sugars was lowered relative to a control diet, no benefit was seen for IHCL and ALT. This was unexpected as a previous study where the restriction of high fructose-containing foods and subsequent decrease in caloric intake over six weeks led to a decrease in hepatic steatosis in children. <sup>8</sup> However, it is worth noting that all subtraction trials in our analyses were conducted with adults, and thus may not directly be comparable to previous findings in children. Our results might also be explained by an elicited energy compensation such that the sugars are replaced by other macronutrients. <sup>3</sup> It is also possible that energy expenditure and metabolism are altered to match the decreased levels of energy, thereby maintaining weight and NAFLD status. <sup>3</sup> No effect was also observed for ALT and AST from ad libitum trials, where mixed sources of fructose-containing sugars were freely exchanged in the diet. In the two <i>ad libitum</i> trials <sup>9</sup> included in our meta analyses, various food sources of fructose-containing sugars were provided, including                                                                                                                                                                                                                                                                                                                                                                                                                                                                | 8. Ibarra-Reynoso LDR, López-Lemus HL, Garay-Sevilla ME, Malacara JM. Effect of Restriction of Foods with High Fructose Corn Syrup Content on Metabolic Indices and Fatty Liver in Obese Children. <i>Obesity facts</i> 2017; 10(4): 332-40.<br>9. Mäkinen KK, Scheinin A. Turku sugar studies XIII. Effect of the diet on certain clinico-chemical values of serum. <i>Acta Odontol Scand</i> 1976; 34(6): 371-80.                                                                                                                                                                                                                                                                                                                                                                                                                                                                                                                                                                                                                                                                                                                                                                                                                                                                                                                                                                                                                                                                         |

|  |                                                                                                                  |  |
|--|------------------------------------------------------------------------------------------------------------------|--|
|  | pastries, condiments, and fruit and vegetable products, which may have opposing effects on ALT and AST measures. |  |
|--|------------------------------------------------------------------------------------------------------------------|--|

ALT=alanine aminotransferase; AST=aspartate aminotransferase; ATP=adenosine triphosphate;  
IHCL=intrahepatocellular lipid; NAFLD=non-alcoholic fatty liver disease; SSB=sugar-sweetened beverage.

### Supplementary Figures

**Supplementary Figure S1: Risk of bias proportion graph for the effect of important food sources of fructose-containing sugars and IHCL (SMD) in substitution trials**

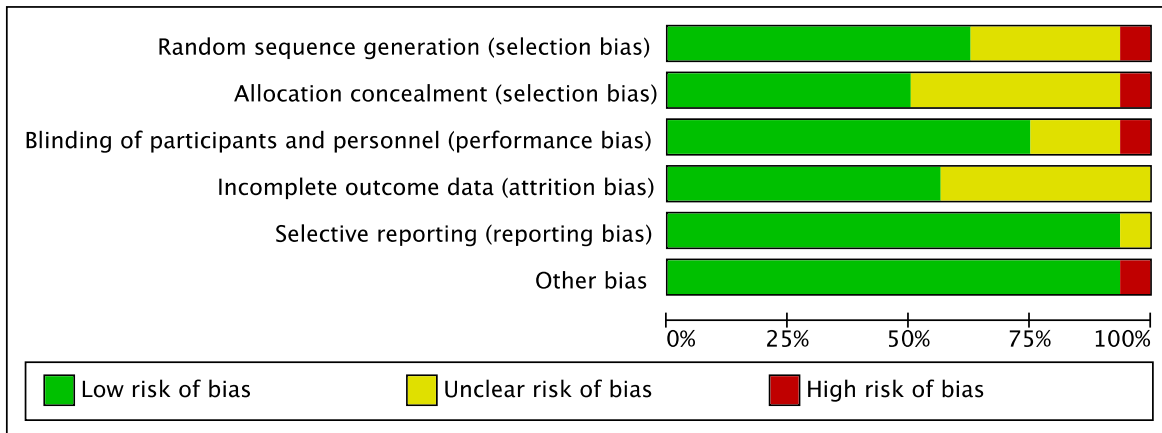

Colored bars represent the proportion of trials assessed as low (green), unclear (yellow) or high (red) risk of bias for the six domains of bias above according to criteria set by the Cochrane Risk of Bias tool in the 14 included controlled trial comparisons.

High other risk of bias (carry-over effect) was given to crossover trials which had no washout between interventions. Trials which did not have this characteristic were rated as Low.

IHCL=intrahepatocellular lipid.

**Supplementary Figure S2: Risk of bias proportion graph for the effect of important food sources of fructose-containing sugars and IHCL (SMD) in addition trials**

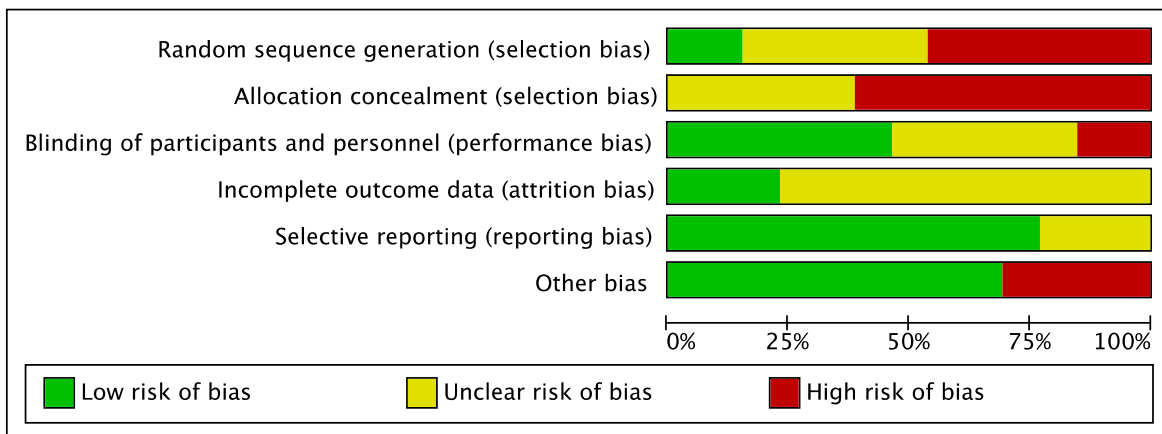

Colored bars represent the proportion of trials assessed as low (green), unclear (yellow) or high (red) risk of bias for the six domains of bias above according to criteria set by the Cochrane Risk of Bias tool in the 11 included controlled trial comparisons.

High other risk of bias (carry-over effect) was given to crossover trials which had no washout between interventions. Trials which did not have this characteristic were rated as Low.

IHCL=intrahepatocellular lipid.

**Supplementary Figure S3: Risk of bias proportion graph for the effect of important food sources of fructose-containing sugars and IHCL (SMD) in subtraction trials**

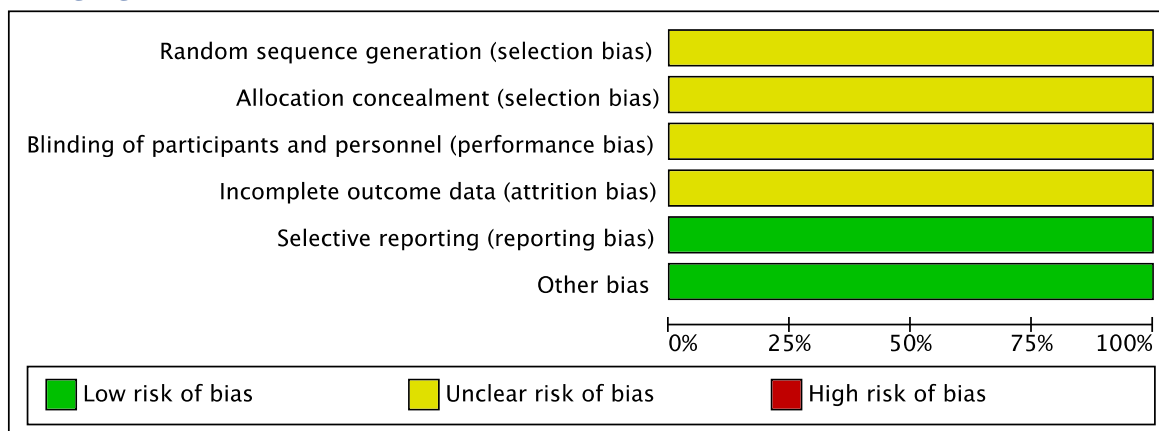

Colored bars represent the proportion of trials assessed as low (green), unclear (yellow) or high (red) risk of bias for the six domains of bias above according to criteria set by the Cochrane Risk of Bias tool in the 2 included controlled trial comparisons, both from the same study.

High other risk of bias (carry-over effect) was given to crossover trials which had no washout between interventions. Trials which did not have this characteristic were rated as Low.

IHCL=intrahepatocellular lipid.

**Supplementary Figure S4: Risk of bias proportion graph for the effect of important food sources of fructose-containing sugars and ALT (U/L) in substitution trials**

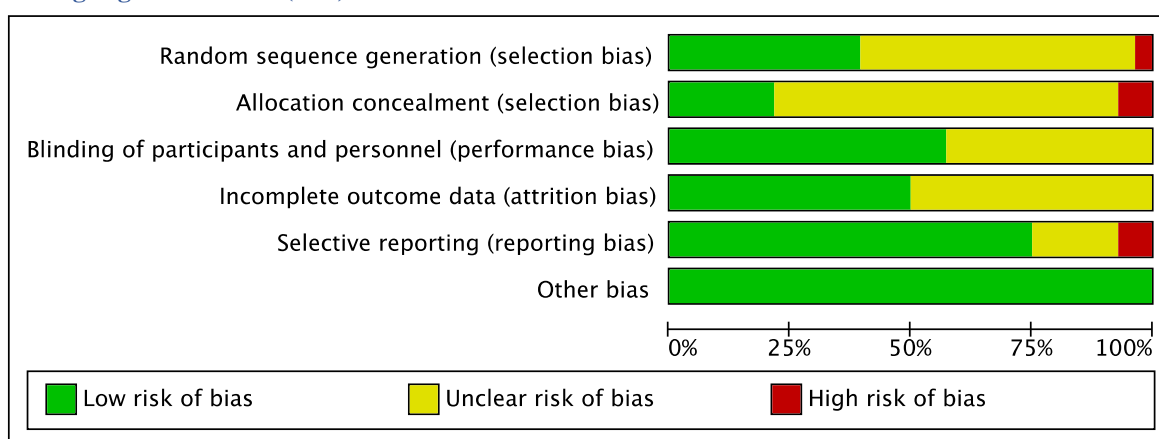

Colored bars represent the proportion of trials assessed as low (green), unclear (yellow) or high (red) risk of bias for the six domains of bias above according to criteria set by the Cochrane Risk of Bias tool in the 25 included controlled trial comparisons.

High other risk of bias (carry-over effect) was given to crossover trials which had no washout between interventions. Trials which did not have this characteristic were rated as Low.

ALT=alanine aminotransferase.

**Supplementary Figure S5: Risk of bias proportion graph for the effect of important food sources of fructose-containing sugars and ALT (U/L) in addition trials**

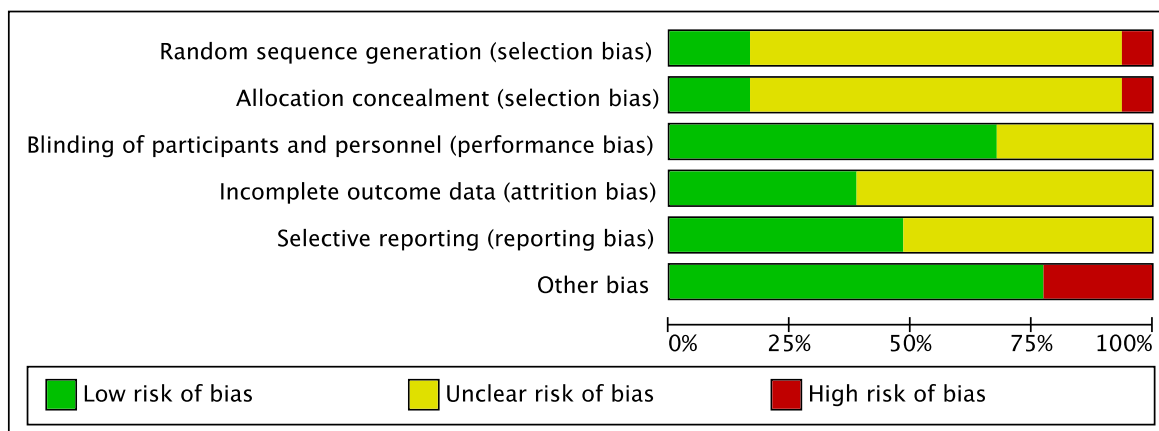

Colored bars represent the proportion of trials assessed as low (green), unclear (yellow) or high (red) risk of bias for the six domains of bias above according to criteria set by the Cochrane Risk of Bias tool in the 23 included controlled trial comparisons.

High other risk of bias (carry-over effect) was given to crossover trials which had no washout between interventions. Trials which did not have this characteristic were rated as Low.

ALT=alanine aminotransferase.

**Supplementary Figure S6: Risk of bias proportion graph for the effect of important food sources of fructose-containing sugars and ALT (U/L) in subtraction trials**

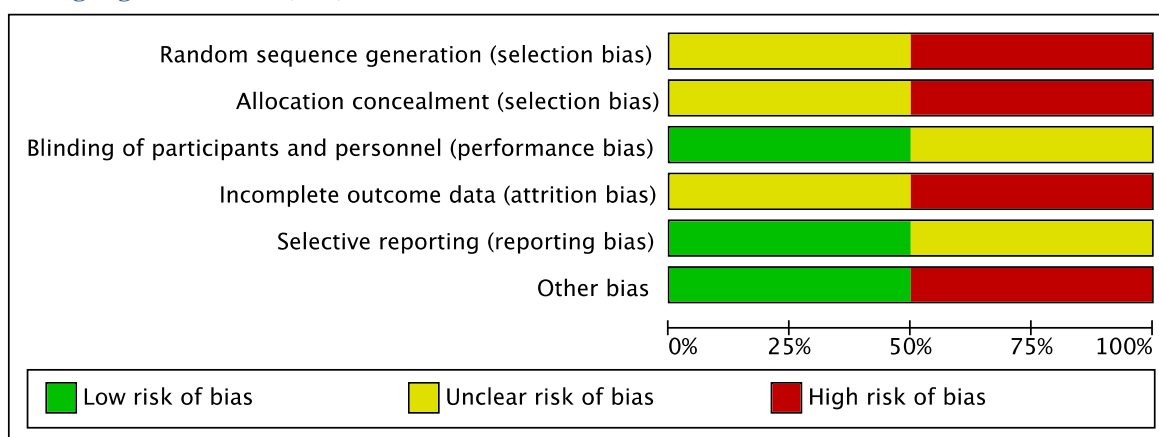

Colored bars represent the proportion of trials assessed as low (green), unclear (yellow) or high (red) risk of bias for the six domains of bias above according to criteria set by the Cochrane Risk of Bias tool in the 2 included controlled trial comparisons, both from the same study.

High other risk of bias (carry-over effect) was given to crossover trials which had no washout between interventions. Trials which did not have this characteristic were rated as Low.

ALT=alanine aminotransferase.

**Supplementary Figure S7: Risk of bias proportion graph for the effect of important food sources of fructose-containing sugars and ALT (U/L) in *ad libitum* trials**

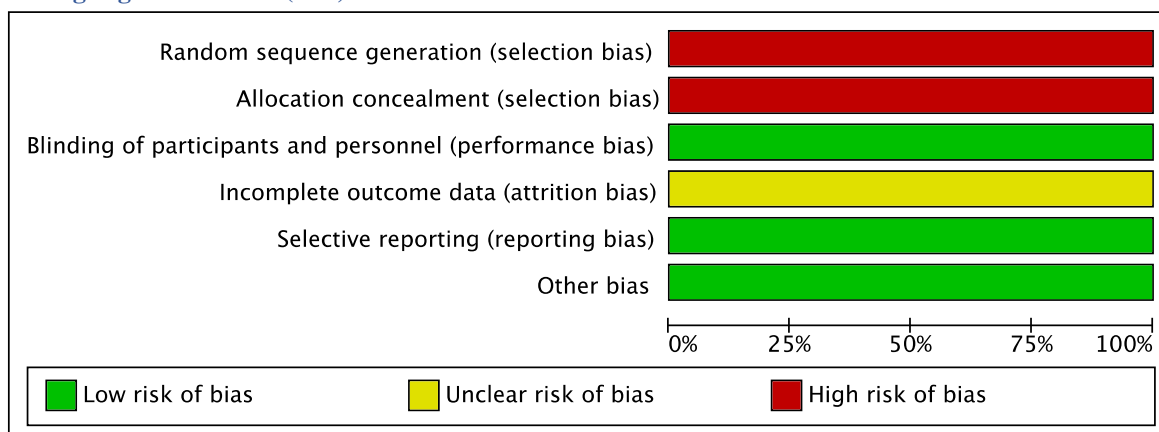

Colored bars represent the proportion of trials assessed as low (green), unclear (yellow) or high (red) risk of bias for the six domains of bias above according to criteria set by the Cochrane Risk of Bias tool in the 2 included controlled trial comparisons, both from the same study.

High other risk of bias (carry-over effect) was given to crossover trials which had no washout between interventions. Trials which did not have this characteristic were rated as Low.

ALT=alanine aminotransferase.

**Supplementary Figure S8: Risk of bias proportion graph for the effect of important food sources of fructose-containing sugars and AST (U/L) in substitution trials**

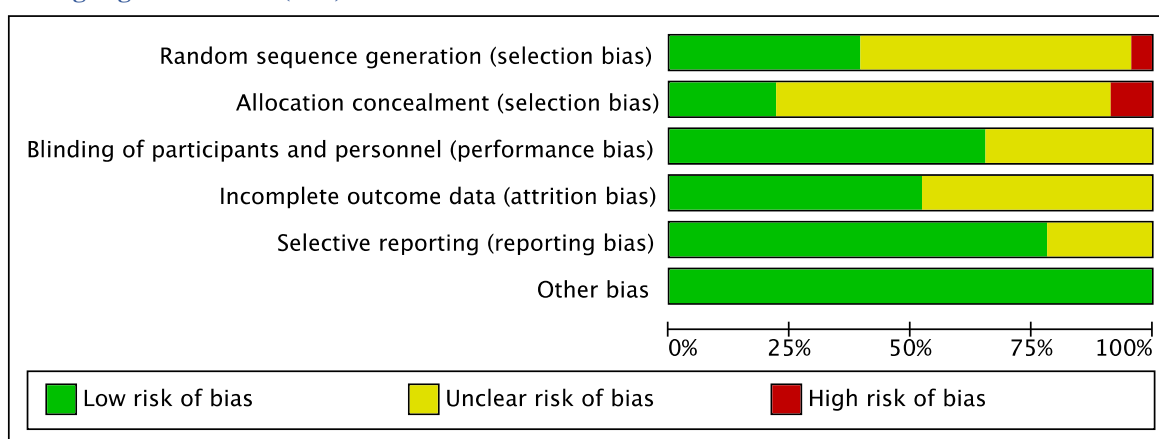

Colored bars represent the proportion of trials assessed as low (green), unclear (yellow) or high (red) risk of bias for the six domains of bias above according to criteria set by the Cochrane Risk of Bias tool in the 21 included controlled trial comparisons.

High other risk of bias (carry-over effect) was given to crossover trials which had no washout between interventions. Trials which did not have this characteristic were rated as Low.

AST=aspartate aminotransferase.



**Supplementary Figure S9: Risk of bias proportion graph for the effect of important food sources of fructose-containing sugars and AST (U/L) in addition trials**

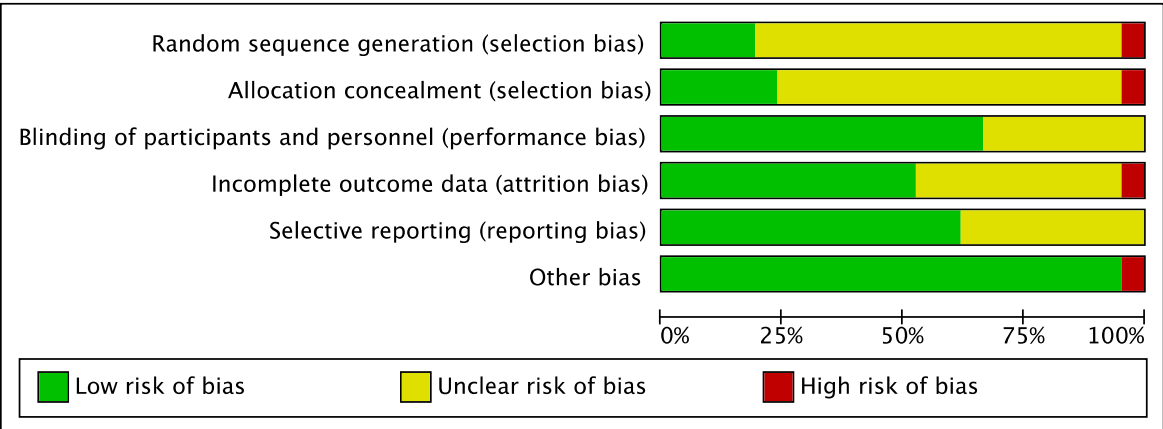

Colored bars represent the proportion of trials assessed as low (green), unclear (yellow) or high (red) risk of bias for the six domains of bias above according to criteria set by the Cochrane Risk of Bias tool in the 13 included controlled trial comparisons.

High other risk of bias (carry-over effect) was given to crossover trials which had no washout between interventions. Trials which did not have this characteristic were rated as Low.

AST=aspartate aminotransferase.

**Supplementary Figure S10: Risk of bias proportion graph for the effect of important food sources of fructose-containing sugars and AST (U/L) in subtraction trials**

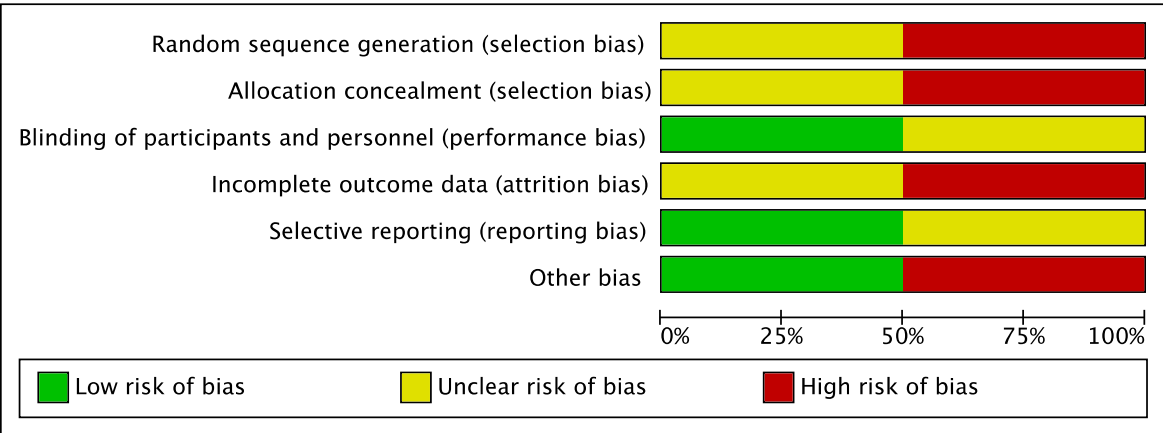

Colored bars represent the proportion of trials assessed as low (green), unclear (yellow) or high (red) risk of bias for the six domains of bias above according to criteria set by the Cochrane Risk of Bias tool in the 13 included controlled trial comparisons.

High other risk of bias (carry-over effect) was given to crossover trials which had no washout between interventions. Trials which did not have this characteristic were rated as Low.

AST=aspartate aminotransferase.

**Supplementary Figure S11: Risk of bias proportion graph for the effect of important food sources of fructose-containing sugars and AST (U/L) in *ad libitum* trials**

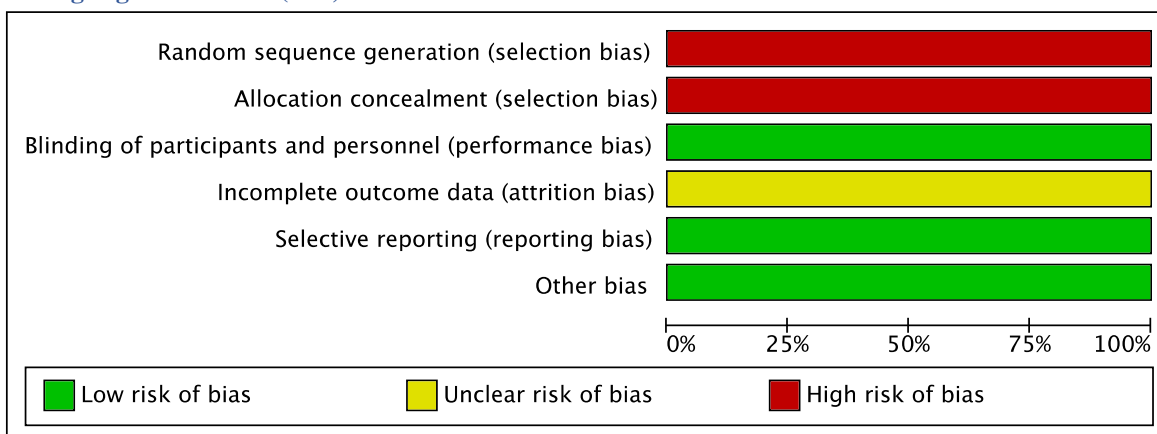

Colored bars represent the proportion of trials assessed as low (green), unclear (yellow) or high (red) risk of bias for the six domains of bias above according to criteria set by the Cochrane Risk of Bias tool in the 13 included controlled trial comparisons.

High other risk of bias (carry-over effect) was given to crossover trials which had no washout between interventions. Trials which did not have this characteristic were rated as Low.

AST=aspartate aminotransferase.

**Supplementary Figure S12: Forest plot of controlled trials of the effect of important food sources of fructose-containing sugars and IHCL (SMD) in substitution trials**

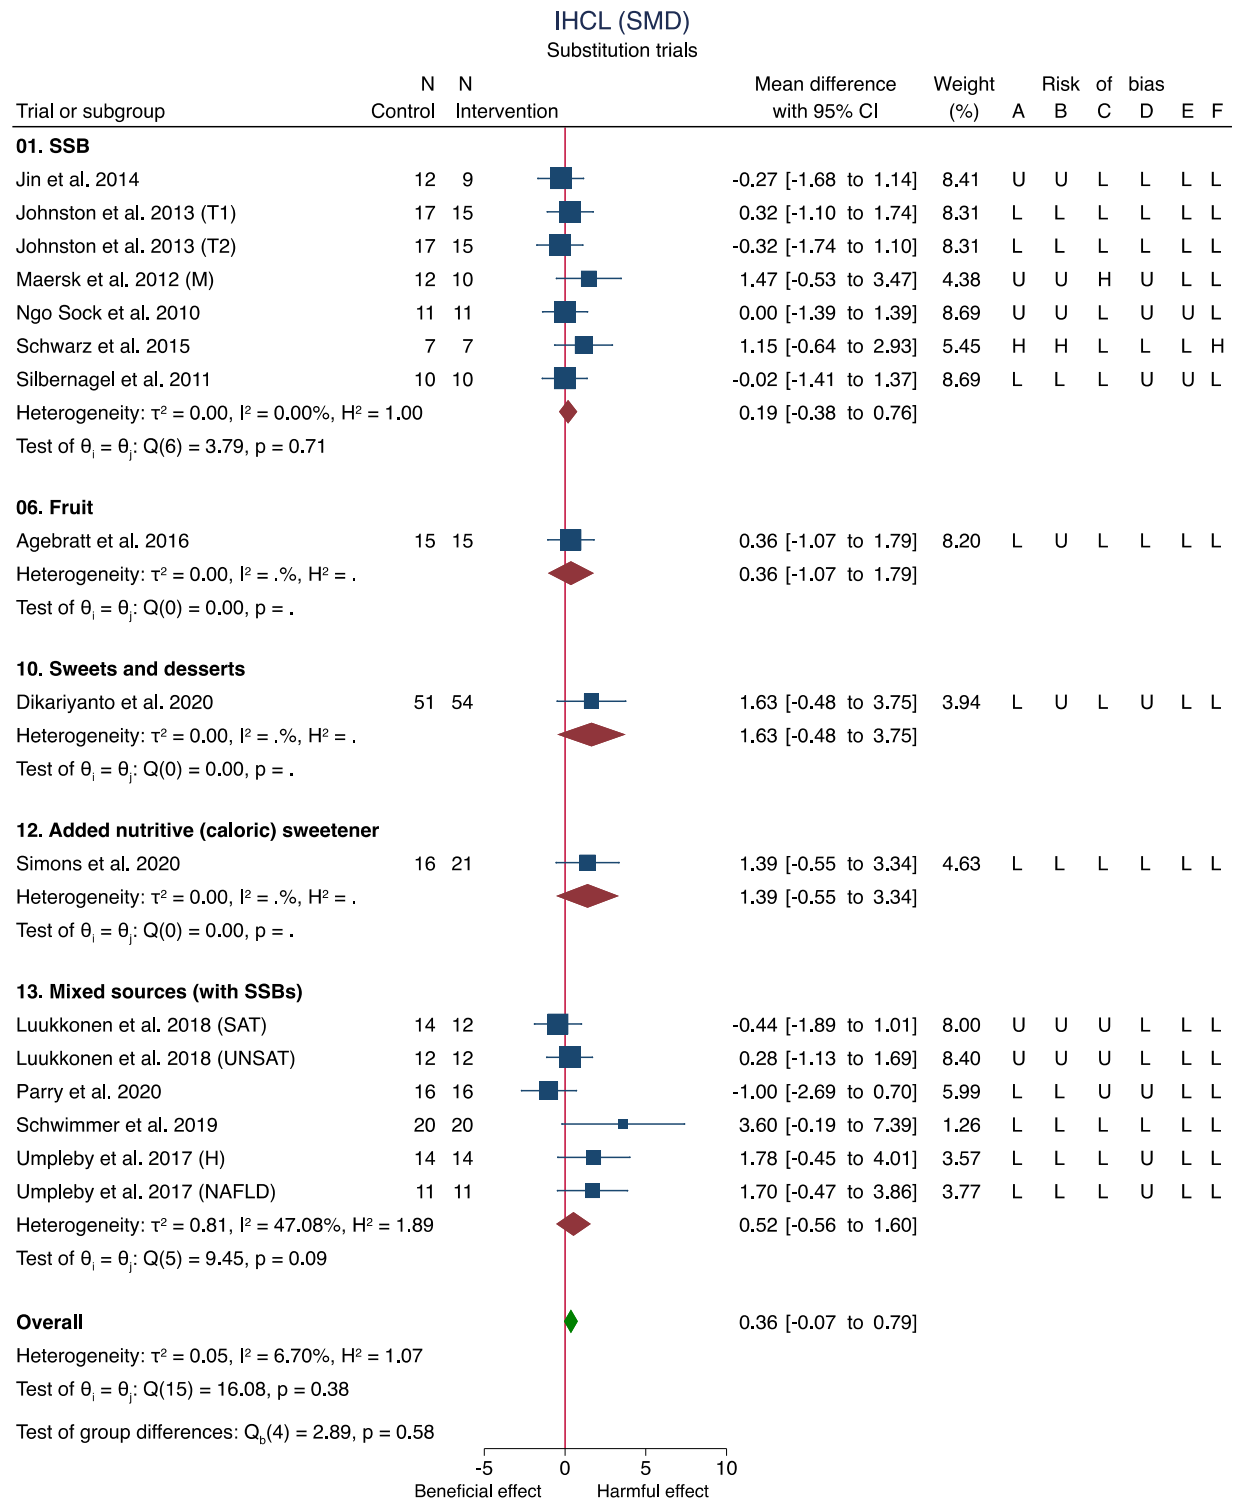

Test of  $\theta = 0$ :  $z = 1.656$ ,  $p = 0.098$

Pooled effect estimates for each subgroup and overall effect are represented by the diamonds. Data are expressed as weighted mean differences with 95% confidence intervals using the generic inverse-variance method and random effects DerSimonian-Laird model. Paired analyses were applied to all crossover trials. Inter-study heterogeneity was

assessed using the Cochrane Q statistic and quantified using the  $I^2$  statistic, with significance set at  $p < 0.100$  and  $I^2 \geq 50\%$  considered to be evidence of substantial heterogeneity.

Risk of Bias Legend: (H) High Risk; (L) Low Risk; (U) Unclear. The letters represent the following risk of bias domains: A, random sequence generation (selection bias); B, allocation concealment (selection bias); C, blinding of participants and personnel and outcome assessors (performance bias); D, incomplete outcome data (attrition bias); E, selective reporting (reporting bias); and F, other bias. High other risk of bias (carry-over effect) was given to crossover trials which had no washout between interventions. Trials which did not have this characteristic were rated as Low.

Pooled effect summary calculated with the  $\chi^2$  test. Test for group differences calculated with meta-regression, which uses the Wald test.

To convert SMD to %liver fat, multiply the SMD by the baseline pooled standard deviation, 0.71%.

CI=confidence interval; H=healthy; IHCL=intrahepatocellular lipid; M=milk; NAFLD=non-alcoholic fatty liver disease; SMD=standardized mean difference; SSB=sugar-sweetened beverage; SAT=saturated fat; T1=test group 1; T2=test group 2; UNSAT=unsaturated fat.

**Supplementary Figure S13: Forest plot of controlled trials of the effect of important food sources of fructose-containing sugars and IHCL (SMD) in addition trials**

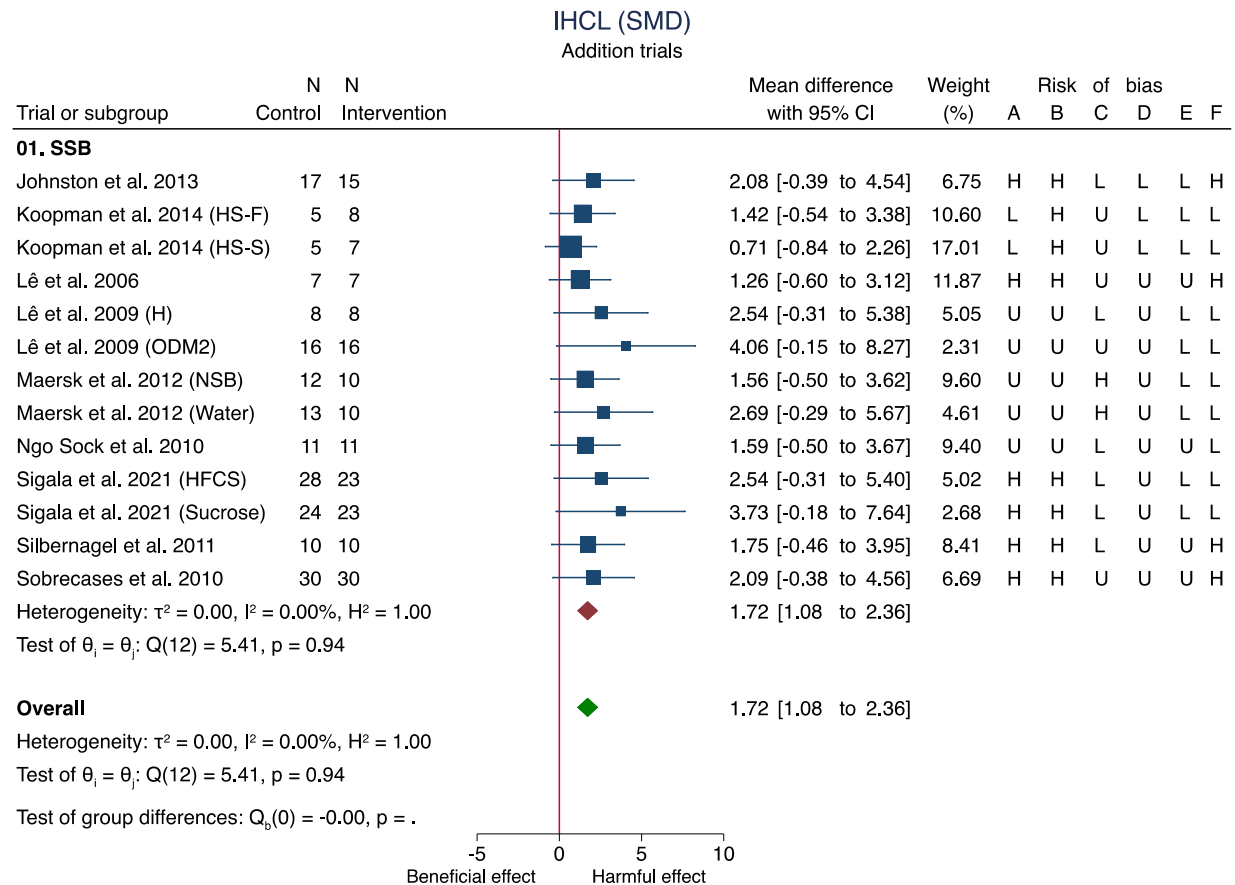

Test of  $\theta = 0$ :  $z = 5.272$ ,  $p = 0.000$

Pooled effect estimates for each subgroup and overall effect are represented by the diamonds. Data are expressed as weighted mean differences with 95% confidence intervals using the generic inverse-variance method and random effects DerSimonian-Laird model. Paired analyses were applied to all crossover trials. Inter-study heterogeneity was assessed using the Cochrane Q statistic and quantified using the  $I^2$  statistic, with significance set at  $p < 0.100$  and  $I^2 \geq 50\%$  considered to be evidence of substantial heterogeneity.

Risk of Bias Legend: (H) High Risk; (L) Low Risk; (U) Unclear. The letters represent the following risk of bias domains: A, random sequence generation (selection bias); B, allocation concealment (selection bias); C, blinding of participants and personnel and outcome assessors (performance bias); D, incomplete outcome data (attrition bias); E, selective reporting (reporting bias); and F, other (carry-over effect) bias. High other risk of bias was given to crossover trials which had no washout between interventions. Trials which did not have this characteristic were rated as Low.

Pooled effect summary calculated with the  $\chi^2$  test. Test for group differences calculated with meta-regression, which uses the Wald test.

To convert SMD to %liver fat, multiply the SMD by the baseline pooled standard deviation, 0.71%.

CI=confidence interval; H=healthy; HS-F=high sucrose-frequency; HS-S=high sucrose-size;

IHCL=intrahepatocellular lipid; NSB=non-nutritive sweetened beverage; ODM2=offspring of type-2 diabetes patients; SMD=standardized mean difference; SSB=sugar-sweetened beverage.

**Supplementary Figure S14: Forest plot of controlled trials of the effect of important food sources of fructose-containing sugars and IHCL (SMD) in subtraction trials**

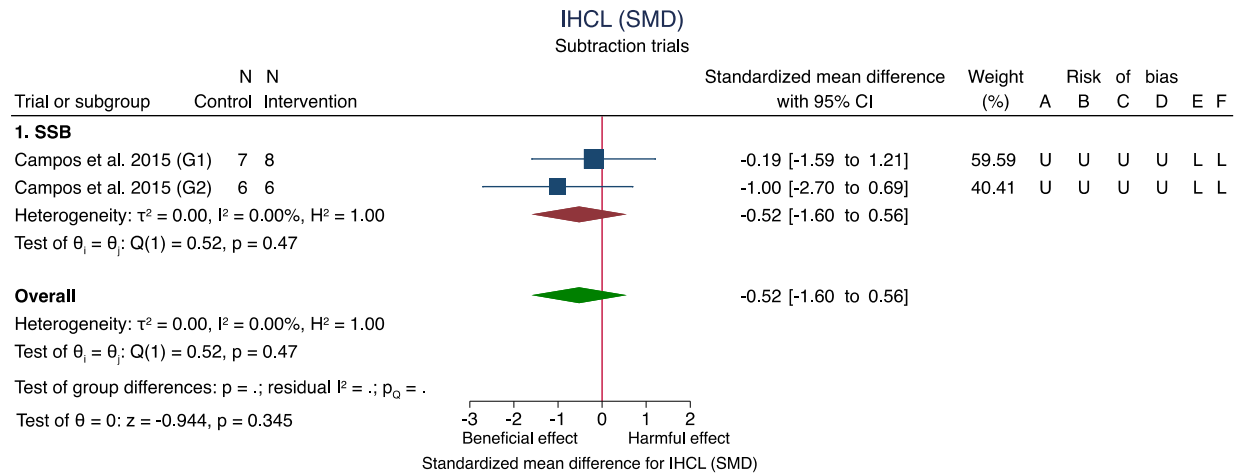

Pooled effect estimates for each subgroup and overall effect are represented by the diamonds. Data are expressed as weighted mean differences with 95% confidence intervals using the generic inverse-variance method and random effects DerSimonian-Laird model. Paired analyses were applied to all crossover trials. Inter-study heterogeneity was assessed using the Cochrane Q statistic and quantified using the  $I^2$  statistic, with significance set at  $p < 0.100$  and  $I^2 \geq 50\%$  considered to be evidence of substantial heterogeneity.

Risk of Bias Legend: (H) High Risk; (L) Low Risk; (U) Unclear. The letters represent the following risk of bias domains: A, random sequence generation (selection bias); B, allocation concealment (selection bias); C, blinding of participants and personnel and outcome assessors (performance bias); D, incomplete outcome data (attrition bias); E, selective reporting (reporting bias); and F, other (carry-over effect) bias. High other risk of bias was given to crossover trials which had no washout between interventions. Trials which did not have this characteristic were rated as Low.

Pooled effect summary calculated with the  $\chi^2$  test. test for group differences calculated with meta-regression, which uses the Wald test.

To convert SMD to % liver fat, multiply the SMD by the baseline pooled standard deviation, 0.71%.

CI=confidence interval; G1=group 1; G2=group 2; IHCL=intrahepatocellular lipid; SSB=sugar-sweetened beverage.

## Supplementary Figure S15: Forest plot of controlled trials of the effect of important food sources of fructose-containing sugars and ALT (U/L) in substitution trials

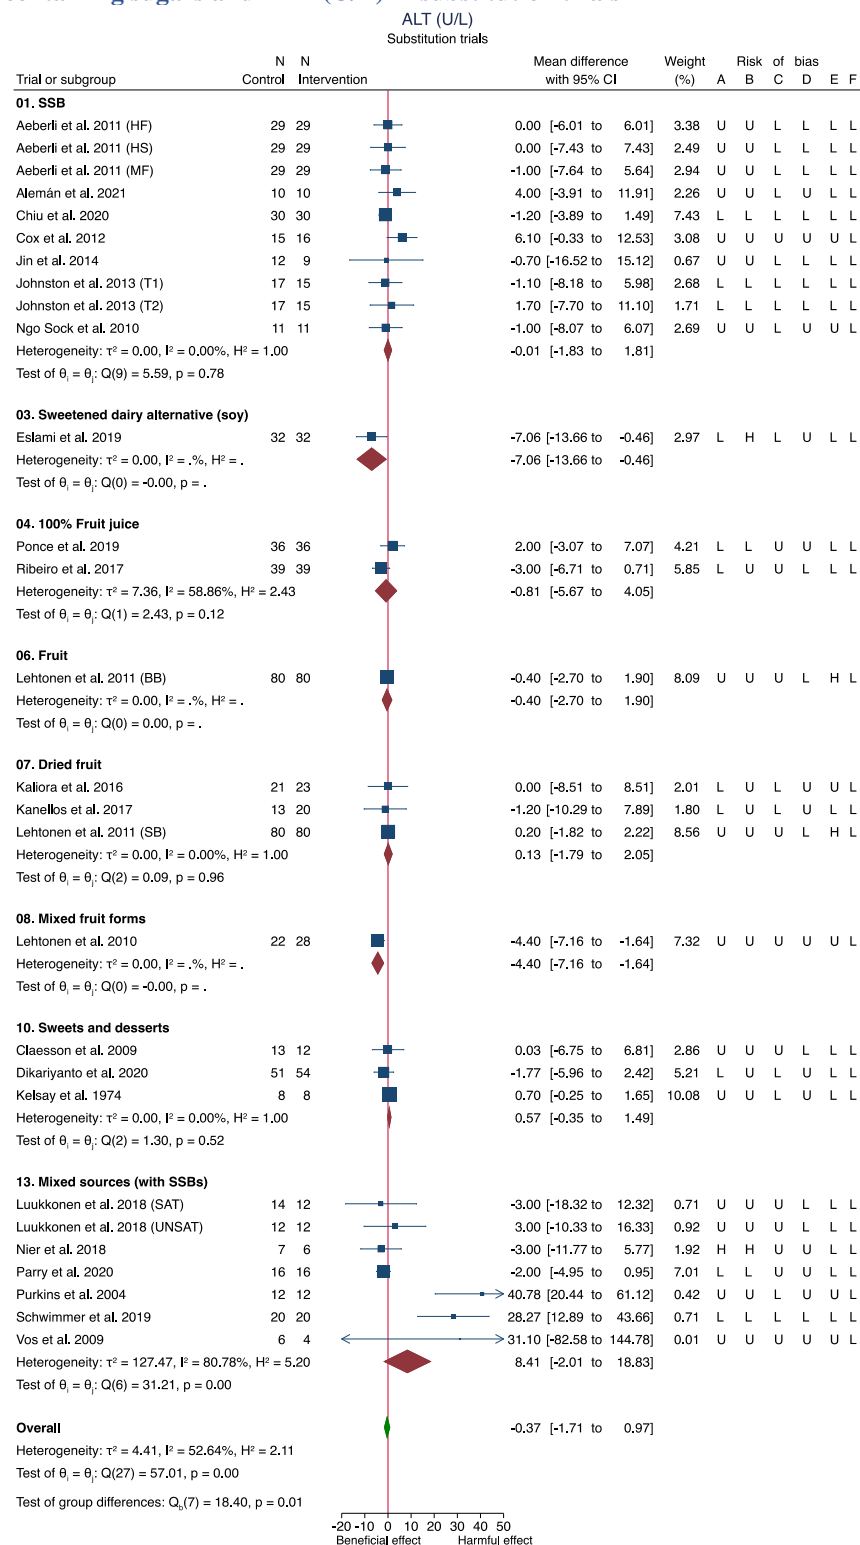

Test of  $\theta = 0$ :  $z = -0.541$ ,  $p = 0.589$

Pooled effect estimates for each subgroup and overall effect are represented by the diamonds. Data are expressed as weighted mean differences with 95% confidence intervals using the generic inverse-variance method and random

effects DerSimonian-Laird model. Paired analyses were applied to all crossover trials. Inter-study heterogeneity was assessed using the Cochrane Q statistic and quantified using the  $I^2$  statistic, with significance set at  $p < 0.100$  and  $I^2 \geq 50\%$  considered to be evidence of substantial heterogeneity.

Risk of Bias Legend: (H) High Risk; (L) Low Risk; (U) Unclear. The letters represent the following risk of bias domains: A, random sequence generation (selection bias); B, allocation concealment (selection bias); C, blinding of participants and personnel and outcome assessors (performance bias); D, incomplete outcome data (attrition bias); E, selective reporting (reporting bias); and F, other (carry-over effect) bias. High other risk of bias was given to crossover trials which had no washout between interventions. Trials which did not have this characteristic were rated as Low.

Pooled effect summary calculated with the  $\chi^2$  test. Test for group differences calculated with meta-regression, which uses the Wald test.

To convert U/L to  $\mu\text{kat/L}$ , multiply U/L by 0.0167.

ALT=alanine aminotransferase; BB=bilberries; CI=confidence interval; HF=high fructose; HS=high sucrose;

MF=medium fructose; SAT=saturated fat; SB=seabuckthorn berry; SSB=sugar-sweetened beverage; T1=test group 1; T2=test group 2; UNSAT=unsaturated fat.



## Supplementary Figure S16: Forest plot of controlled trials of the effect of important food sources of fructose-containing sugars and ALT (U/L) in addition trials

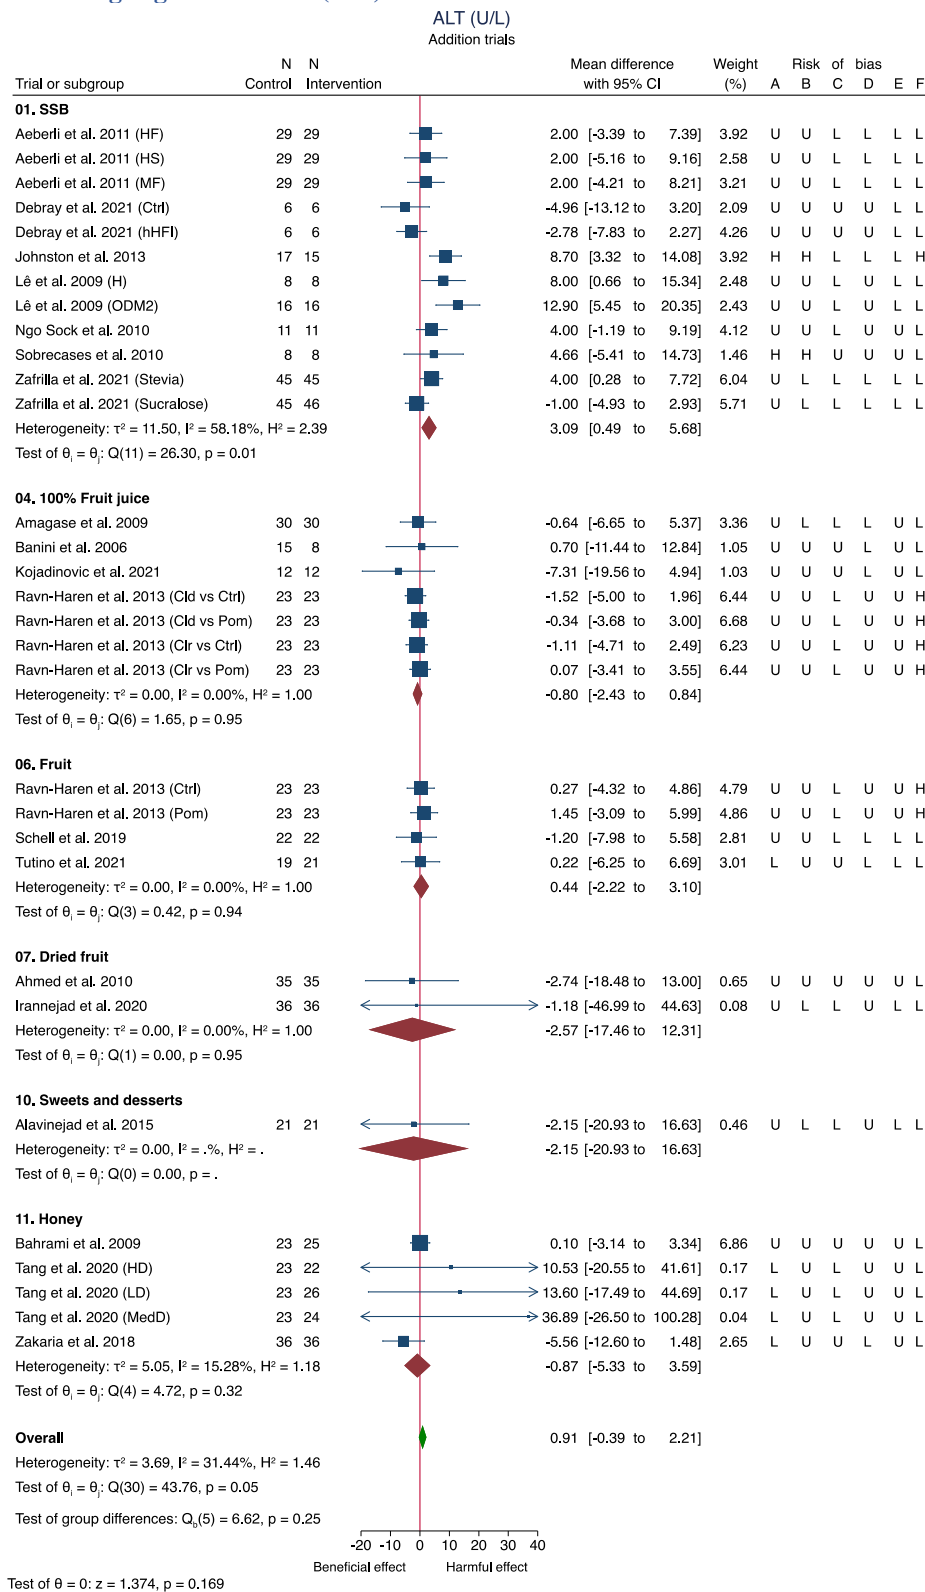

Pooled effect estimates for each subgroup and overall effect are represented by the diamonds. Data are expressed as weighted mean differences with 95% confidence intervals using the generic inverse-variance method and random

effects DerSimonian-Laird model. Paired analyses were applied to all crossover trials. Inter-study heterogeneity was assessed using the Cochrane Q statistic and quantified using the  $I^2$  statistic, with significance set at  $p < 0.100$  and  $I^2 \geq 50\%$  considered to be evidence of substantial heterogeneity.

Risk of Bias Legend: (H) High Risk; (L) Low Risk; (U) Unclear. The letters represent the following risk of bias domains: A, random sequence generation (selection bias); B, allocation concealment (selection bias); C, blinding of participants and personnel and outcome assessors (performance bias); D, incomplete outcome data (attrition bias); E, selective reporting (reporting bias); and F, other (carry-over effect) bias. High other risk of bias was given to crossover trials which had no washout between interventions. Trials which did not have this characteristic were rated as Low.

Pooled effect summary calculated with the  $\chi^2$  test. Test for group differences calculated with meta-regression, which uses the Wald test.

To convert U/L to  $\mu\text{kat/L}$ , multiply U/L by 0.0167.

ALT=alanine aminotransferase; CI=confidence interval; Cld=cloudy apple juice; Clr=clear apple juice; Ctrl=control group; H=healthy; HD=high dose; HF=high fructose; hHFI=heterozygote high fructose intolerance; HS=high sucrose; LD=low dose; MD=mean difference; MedD=medium dose; MF=medium fructose; ODM2=offspring of type-2 diabetes patients; Pom=apple pomace; SSB=sugar-sweetened beverage.

# Supplementary Figure S17: Forest plot of controlled trials of the effect of important food sources of fructose-containing sugars and ALT (U/L) in subtraction trials

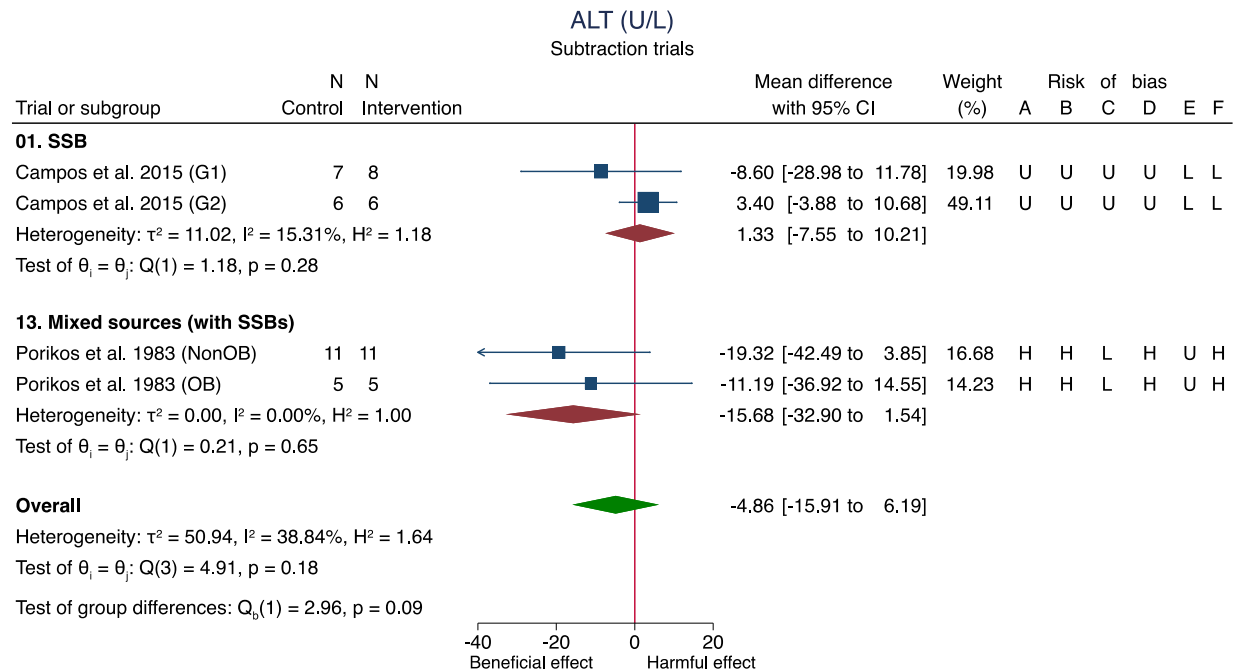

Test of  $\theta = 0$ :  $z = -0.862$ ,  $p = 0.388$

Pooled effect estimates for each subgroup and overall effect are represented by the diamonds. Data are expressed as weighted mean differences with 95% confidence intervals using the generic inverse-variance method and random effects DerSimonian-Laird model. Paired analyses were applied to all crossover trials. Inter-study heterogeneity was assessed using the Cochrane Q statistic and quantified using the  $I^2$  statistic, with significance set at  $p < 0.100$  and  $I^2 \geq 50\%$  considered to be evidence of substantial heterogeneity.

Risk of Bias Legend: (H) High Risk; (L) Low Risk; (U) Unclear. The letters represent the following risk of bias domains: A, random sequence generation (selection bias); B, allocation concealment (selection bias); C, blinding of participants and personnel and outcome assessors (performance bias); D, incomplete outcome data (attrition bias); E, selective reporting (reporting bias); and F, other (carry-over effect) bias. High other risk of bias was given to crossover trials which had no washout between interventions. Trials which did not have this characteristic were rated as Low.

Pooled effect summary calculated with the  $\chi^2$  test. Test for group differences calculated with meta-regression, which uses the Wald test.

To convert U/L to ukat/L, multiply U/L by 0.0167.

ALT=alanine aminotransferase; CI=confidence interval; G1=group 1; G2=group 2; NonOB=non-obese; OB=obese.

Supplementary Figure S18: Forest plot of controlled trials of the effect of important food sources of fructose-containing sugars and ALT (U/L) in *ad libitum* trials

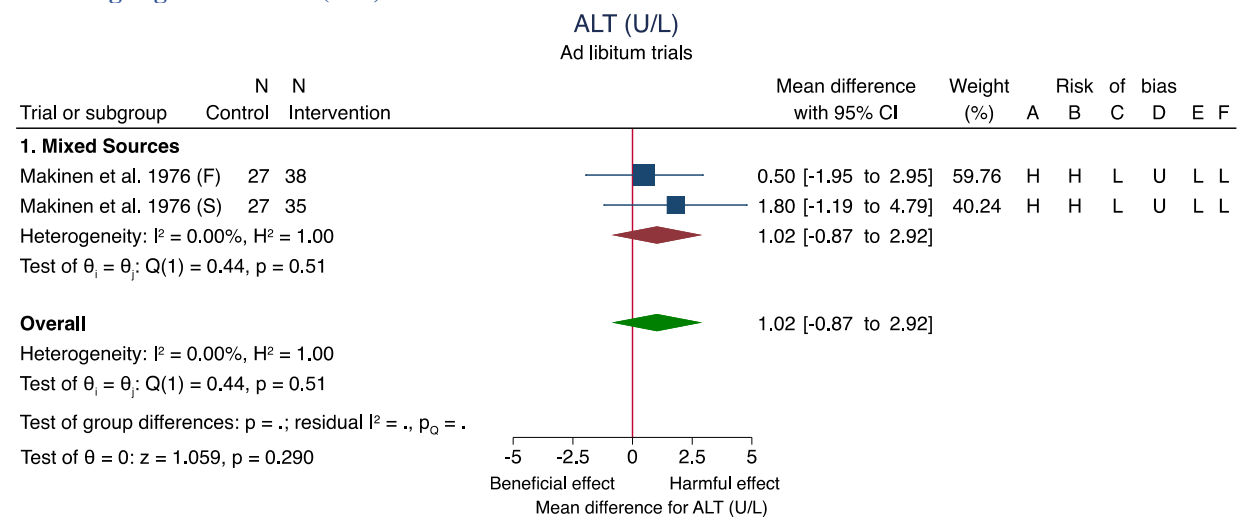

Pooled effect estimates for each subgroup and overall effect are represented by the diamonds. Data are expressed as weighted mean differences with 95% confidence intervals using the generic inverse-variance method and random effects DerSimonian-Laird model. Paired analyses were applied to all crossover trials. Inter-study heterogeneity was assessed using the Cochrane Q statistic and quantified using the  $I^2$  statistic, with significance set at  $p < 0.100$  and  $I^2 \geq 50\%$  considered to be evidence of substantial heterogeneity.

Risk of Bias Legend: (H) High Risk; (L) Low Risk; (U) Unclear. The letters represent the following risk of bias domains: A, random sequence generation (selection bias); B, allocation concealment (selection bias); C, blinding of participants and personnel and outcome assessors (performance bias); D, incomplete outcome data (attrition bias); E, selective reporting (reporting bias); and F, other (carry-over effect) bias. High other risk of bias was given to crossover trials which had no washout between interventions. Trials which did not have this characteristic were rated as Low.

Pooled effect summary calculated with the  $\chi^2$  test. Test for group differences calculated with meta-regression, which uses the Wald test.

To convert U/L to  $\mu\text{kat/L}$ , multiply U/L by 0.0167.

ALT=alanine aminotransferase; CI=confidence interval; F=fructose; S=sucrose.

# Supplementary Figure S19: Forest plot of controlled trials of the effect of important food sources of fructose-containing sugars and AST (U/L) in substitution trials

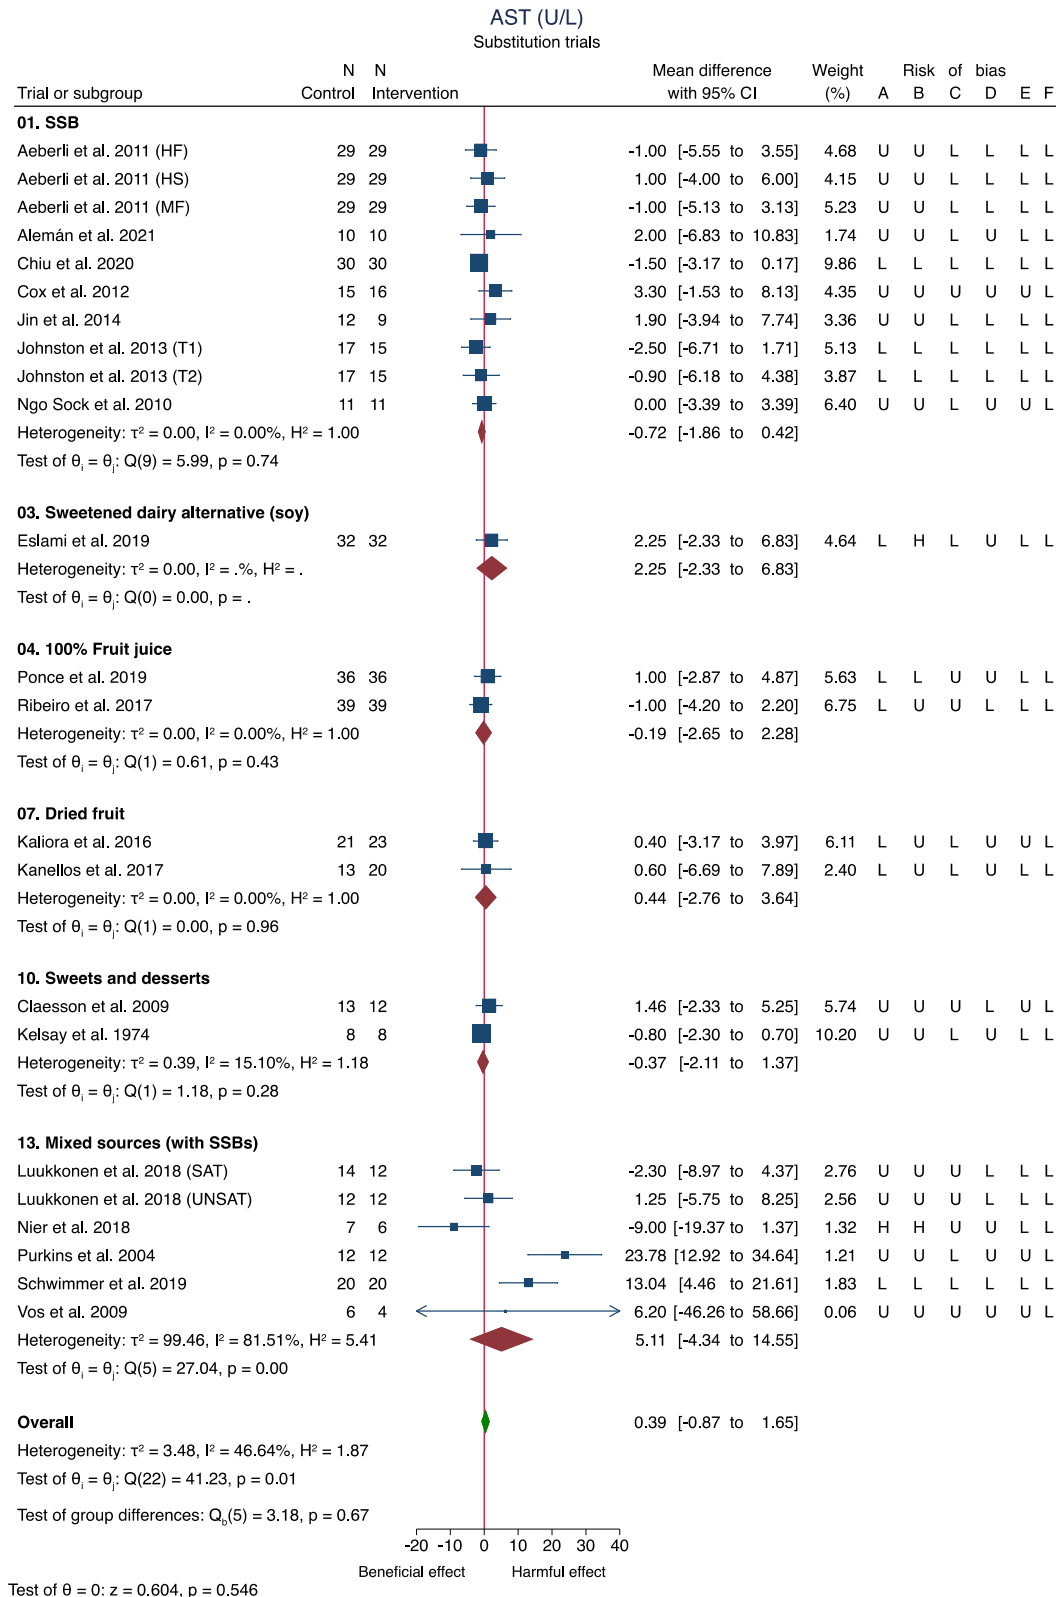

Pooled effect estimates for each subgroup and overall effect are represented by the diamonds. Data are expressed as weighted mean differences with 95% confidence intervals using the generic inverse-variance method and random

effects DerSimonian-Laird model. Paired analyses were applied to all crossover trials. Inter-study heterogeneity was assessed using the Cochrane Q statistic and quantified using the  $I^2$  statistic, with significance set at  $p < 0.100$  and  $I^2 \geq 50\%$  considered to be evidence of substantial heterogeneity.

Risk of Bias Legend: (H) High Risk; (L) Low Risk; (U) Unclear. The letters represent the following risk of bias domains: A, random sequence generation (selection bias); B, allocation concealment (selection bias); C, blinding of participants and personnel and outcome assessors (performance bias); D, incomplete outcome data (attrition bias); E, selective reporting (reporting bias); and F, other (carry-over effect) bias. High other risk of bias was given to crossover trials which had no washout between interventions. Trials which did not have this characteristic were rated as Low.

Pooled effect summary calculated with the  $\chi^2$  test. Test for group differences calculated with meta-regression, which uses the Wald test.

To convert U/L to  $\mu\text{kat/L}$ , multiply U/L by 0.0167.

AST=aspartate aminotransferase; CI=confidence interval; SSB=sugar-sweetened beverage; HF=high fructose; HS=high sucrose; MF=medium fructose; SAT=saturated fat; SSB=sugar-sweetened beverage; T1=test group 1; T2=test group 2; UNSAT=unsaturated fat.

# Supplementary Figure S20: Forest plot of controlled trials of the effect of important food sources of fructose-containing sugars and AST (U/L) in addition trials

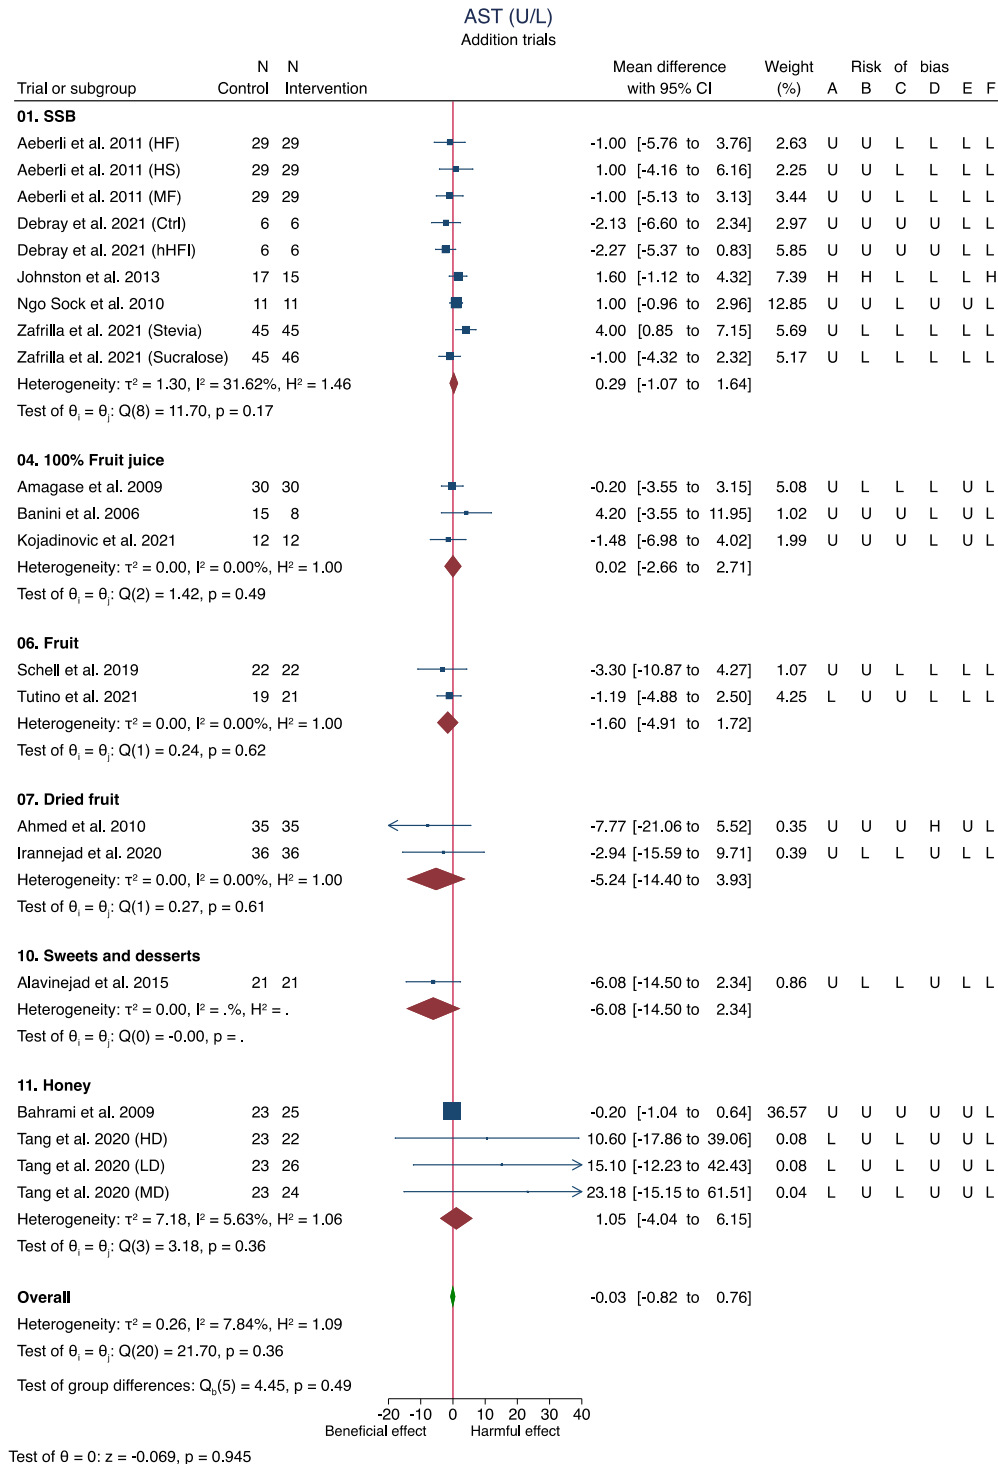

Pooled effect estimates for each subgroup and overall effect are represented by the diamonds. Data are expressed as weighted mean differences with 95% confidence intervals using the generic inverse-variance method and random effects DerSimonian-Laird model. Paired analyses were applied to all crossover trials. Inter-study heterogeneity was assessed using the Cochrane Q statistic and quantified using the  $I^2$  statistic, with significance set at  $p < 0.100$  and  $I^2 \geq 50\%$  considered to be evidence of substantial heterogeneity.

Risk of Bias Legend: (H) High Risk; (L) Low Risk; (U) Unclear. The letters represent the following risk of bias domains: A, random sequence generation (selection bias); B, allocation concealment (selection bias); C, blinding of participants and personnel and outcome assessors (performance bias); D, incomplete outcome data (attrition bias); E, selective reporting (reporting bias); and F, other (carry-over effect) bias. High other risk of bias was given to crossover trials which had no washout between interventions. Trials which did not have this characteristic were rated as Low.

Pooled effect summary calculated with the  $\chi^2$  test. Test for group differences calculated with meta-regression, which uses the Wald test.

To convert U/L to  $\mu\text{kat/L}$ , multiply U/L by 0.0167.

AST=aspartate aminotransferase; CI=confidence interval; Ctrl=control; HD=high dose; HF=high fructose; hHFI=heterozygote high fructose intolerance; HS=high sucrose; LD=low dose; MD=medium dose; MF=medium fructose; SSB=sugar-sweetened beverage.



# **Supplementary Figure S21: Forest plot of controlled trials of the effect of important food sources of fructose-containing sugars and AST (U/L) in subtraction trials**

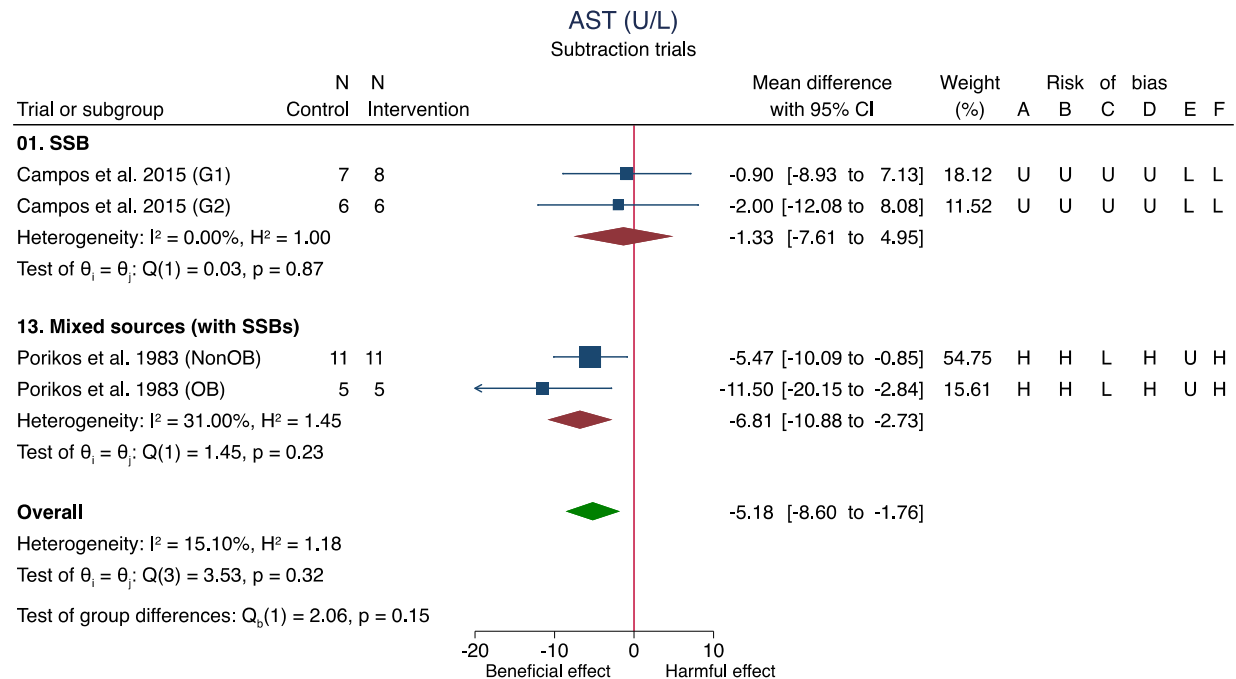

Test of  $\theta = 0$ :  $z = -2.970$ ,  $p = 0.003$

Pooled effect estimates for each subgroup and overall effect are represented by the diamonds. Data are expressed as weighted mean differences with 95% confidence intervals using the generic inverse-variance method and random effects DerSimonian-Laird model. Paired analyses were applied to all crossover trials. Inter-study heterogeneity was assessed using the Cochrane Q statistic and quantified using the  $I^2$  statistic, with significance set at  $p < 0.100$  and  $I^2 \geq 50\%$  considered to be evidence of substantial heterogeneity.

Risk of Bias Legend: (H) High Risk; (L) Low Risk; (U) Unclear. The letters represent the following risk of bias domains: A, random sequence generation (selection bias); B, allocation concealment (selection bias); C, blinding of participants and personnel and outcome assessors (performance bias); D, incomplete outcome data (attrition bias); E, selective reporting (reporting bias); and F, other (carry-over effect) bias. High other risk of bias was given to crossover trials which had no washout between interventions. Trials which did not have this characteristic were rated as Low.

Pooled effect summary calculated with the  $\chi^2$  test. Test for group differences calculated with meta-regression, which uses the Wald test.

To convert U/L to ukat/L, multiply U/L by 0.0167.

AST=aspartate aminotransferase; CI=confidence interval; G1=group 1; G2=group 2; NonOB=non-obese; OB=obese; SSB=sugar-sweetened beverage.

**Supplementary Figure S22: Forest plot of controlled trials of the effect of important food sources of fructose-containing sugars and AST (U/L) in *ad libitum* trials**

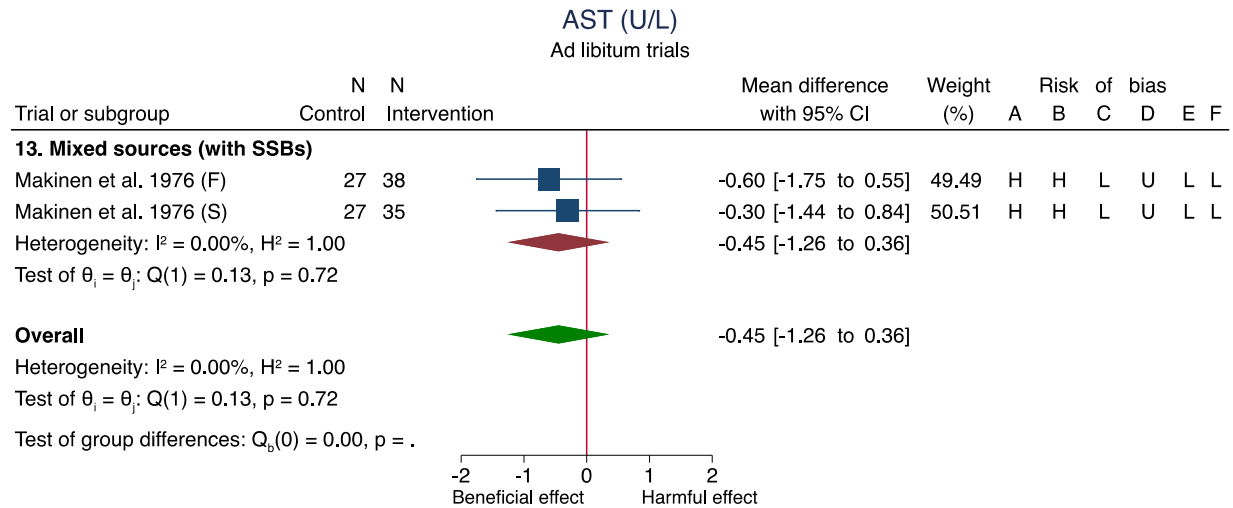

Test of  $\theta = 0$ :  $z = -1.086$ ,  $p = 0.277$

Pooled effect estimates for each subgroup and overall effect are represented by the diamonds. Data are expressed as weighted mean differences with 95% confidence intervals using the generic inverse-variance method and random effects DerSimonian-Laird model. Paired analyses were applied to all crossover trials. Inter-study heterogeneity was assessed using the Cochrane Q statistic and quantified using the  $I^2$  statistic, with significance set at  $p < 0.100$  and  $I^2 \geq 50\%$  considered to be evidence of substantial heterogeneity.

Risk of Bias Legend: (H) High Risk; (L) Low Risk; (U) Unclear. The letters represent the following risk of bias domains: A, random sequence generation (selection bias); B, allocation concealment (selection bias); C, blinding of participants and personnel and outcome assessors (performance bias); D, incomplete outcome data (attrition bias); E, selective reporting (reporting bias); and F, other (carry-over effect) bias. High other risk of bias was given to crossover trials which had no washout between interventions. Trials which did not have this characteristic were rated as Low.

Pooled effect summary calculated with the  $\chi^2$  test. Test for group differences calculated with meta-regression, which uses the Wald test.

To convert U/L to  $\mu\text{kat/L}$ , multiply U/L by 0.0167.

AST=aspartate aminotransferase; CI=confidence interval; F=fructose; S=sucrose; SSB=sugar-sweetened beverage.

**Supplementary Figure S23: Sensitivity analysis of the systematic removal of each trial for the effect of important food sources of fructose-containing sugars and IHCL (SMD) in substitution trials**

**Influence analysis**  
**IHCL (SMD) in substitution trials**

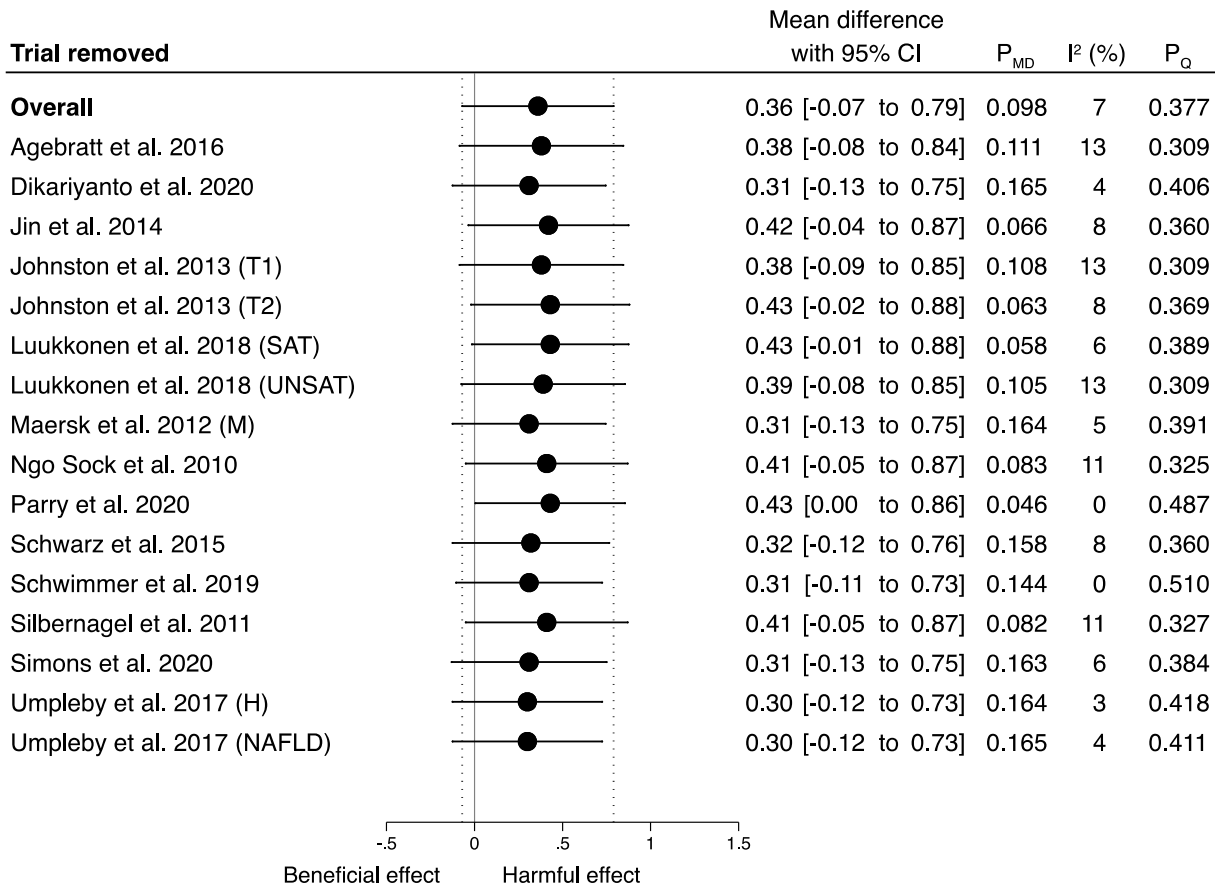

*Influence analysis: Removal of each trial, one at a time and recalculation of the overall effect and heterogeneity*

CI=confidence interval; IHCL=intrahepatocellular lipid; H=healthy; M=milk; MD=mean difference; NAFLD=non-alcoholic fatty liver disease; SAT=saturated fat; SMD=standardized mean difference; T1=test group 1; T2=test group 2; UNSAT=unsaturated fat.

**Supplementary Figure S24: Sensitivity analysis of the systematic removal of each trial for the effect of important food sources of fructose-containing sugars and IHCL (SMD) in addition trials**

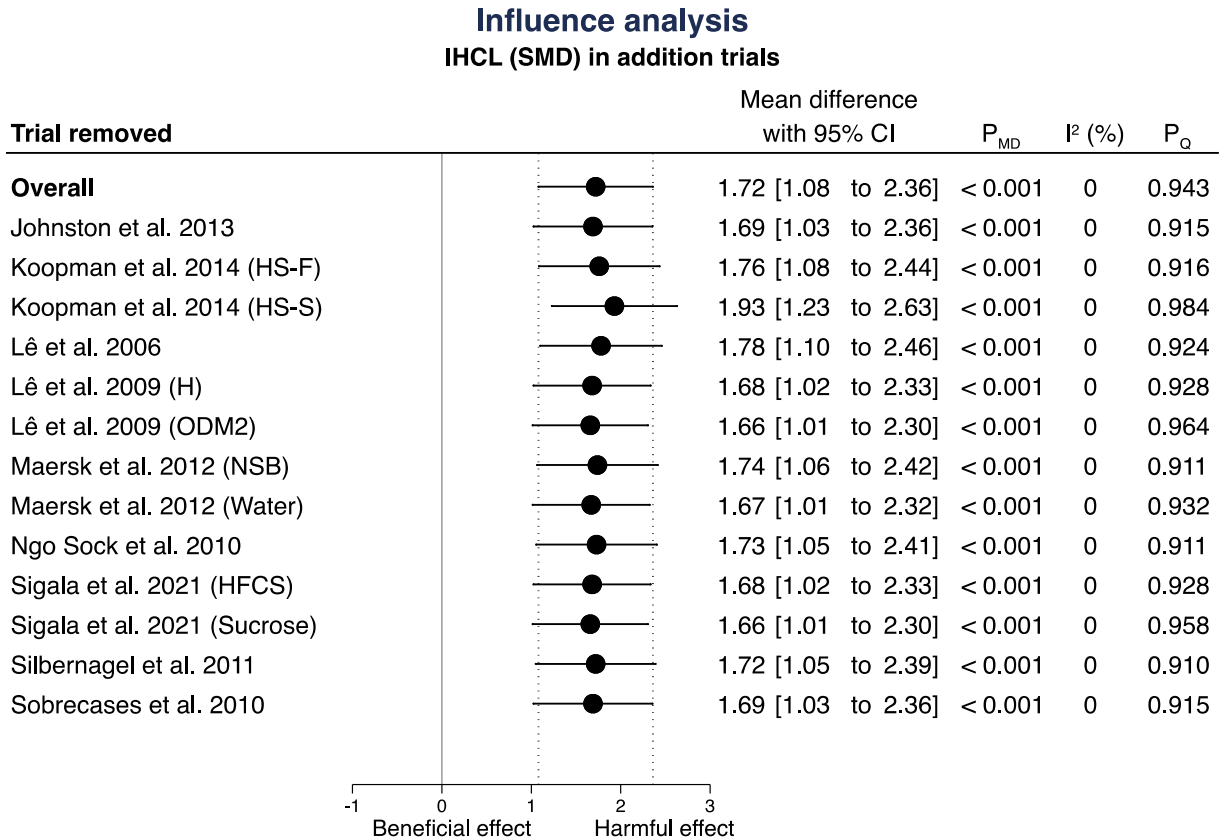

*Influence analysis: Removal of each trial, one at a time and recalculation of the overall effect and heterogeneity*

CI=confidence interval; H=healthy; HS-F=high sucrose-frequency; HS-S=high sucrose-size; IHCL=intrahepatocellular lipid; MD=mean difference; NSB=non-nutritive sweetened beverage; ODM2=offspring of type-2 diabetes patients; SMD=standardized mean difference.

**Supplementary Figure S25: Sensitivity analysis of the systematic removal of each trial in the primary analysis of the effect of important food sources of fructose-containing sugars and IHCL (SMD) in subtraction trials**

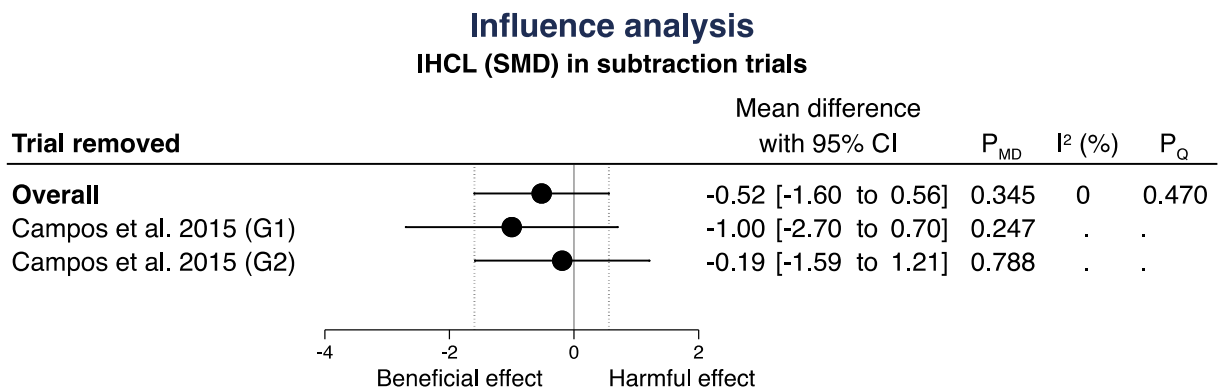

*Influence analysis: Removal of each trial, one at a time and recalculation of the overall effect and heterogeneity*

CI=confidence interval; G1=group 1; G2=group 2; IHCL=intrahepatocellular lipid; MD=mean difference; SMD=standardized mean difference.

**Supplementary Figure S26: Sensitivity analysis of the systematic removal of each trial for the effect of important food sources of fructose-containing sugars and ALT (U/L) in substitution trials**

**Influence analysis**  
**ALT (U/L) in substitution trials**

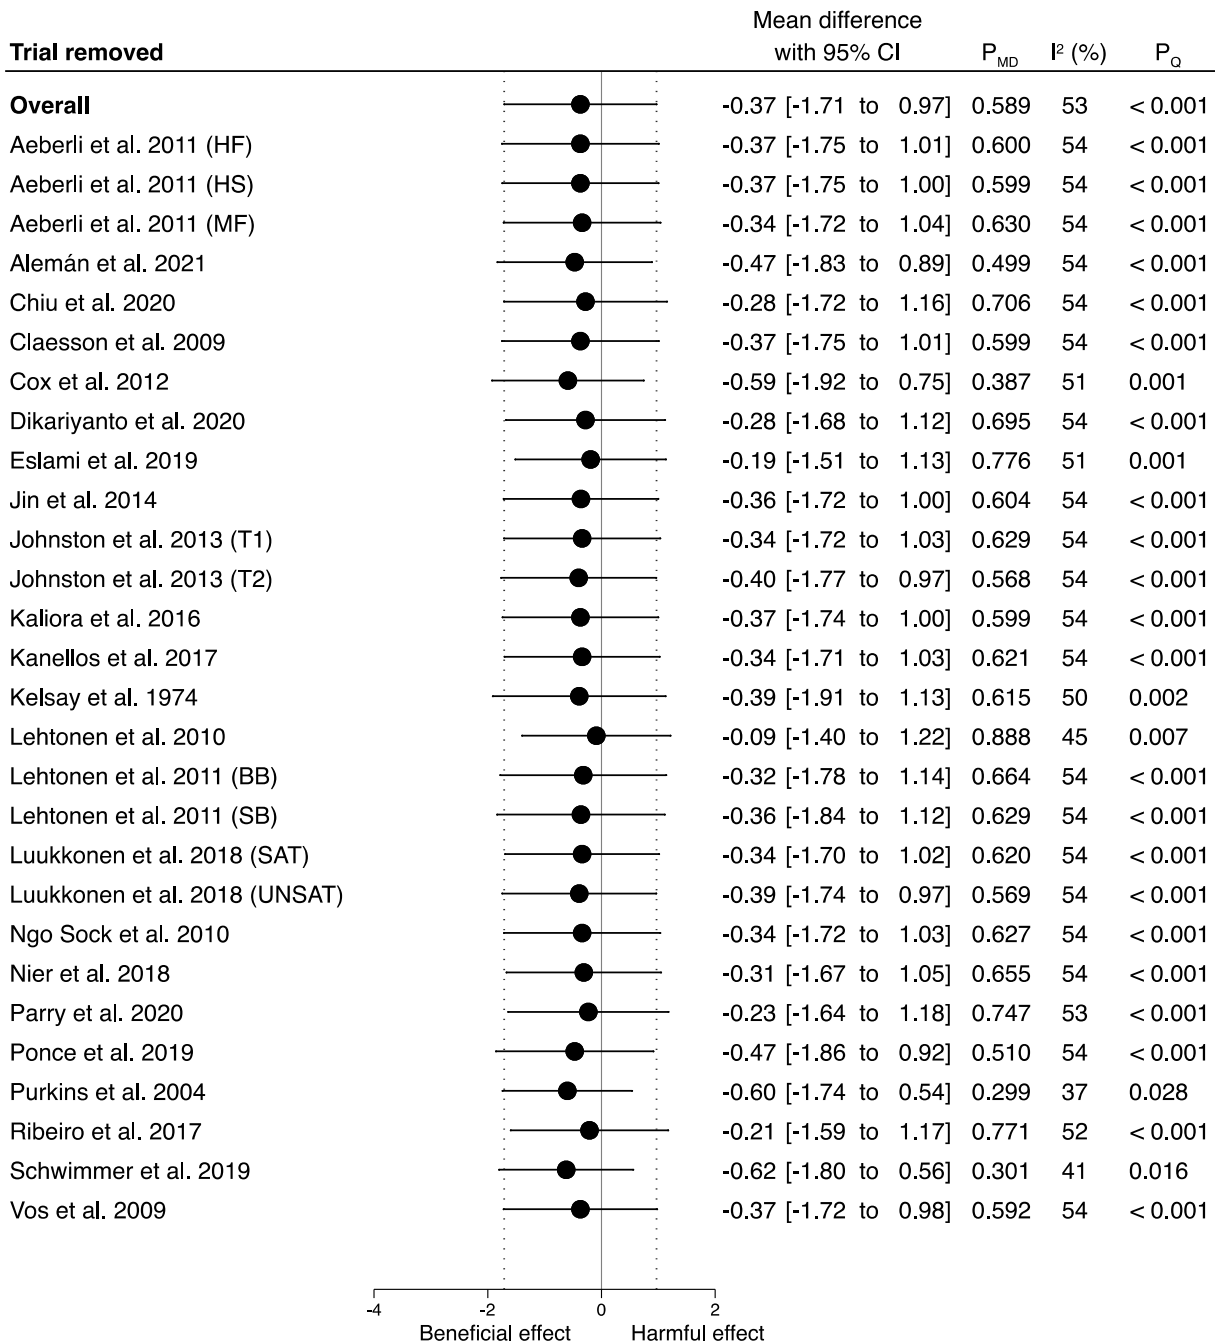

*Influence analysis: Removal of each trial, one at a time and recalculation of the overall effect and heterogeneity*

ALT=alanine aminotransferase; BB=bilberries; CI=confidence interval; HF=high fructose; HS=high sucrose; MD=mean difference; MF=medium fructose; SAT=saturated fat; SB=seabuckthorn berries; T1=test group 1; T2=test group 2; UNSAT=unsaturated fat.

**Supplementary Figure S27: Sensitivity analysis of the systematic removal of each trial for the effect of important food sources of fructose-containing sugars and ALT (U/L) in addition trials**

**Influence analysis**  
**ALT (U/L) in addition trials**

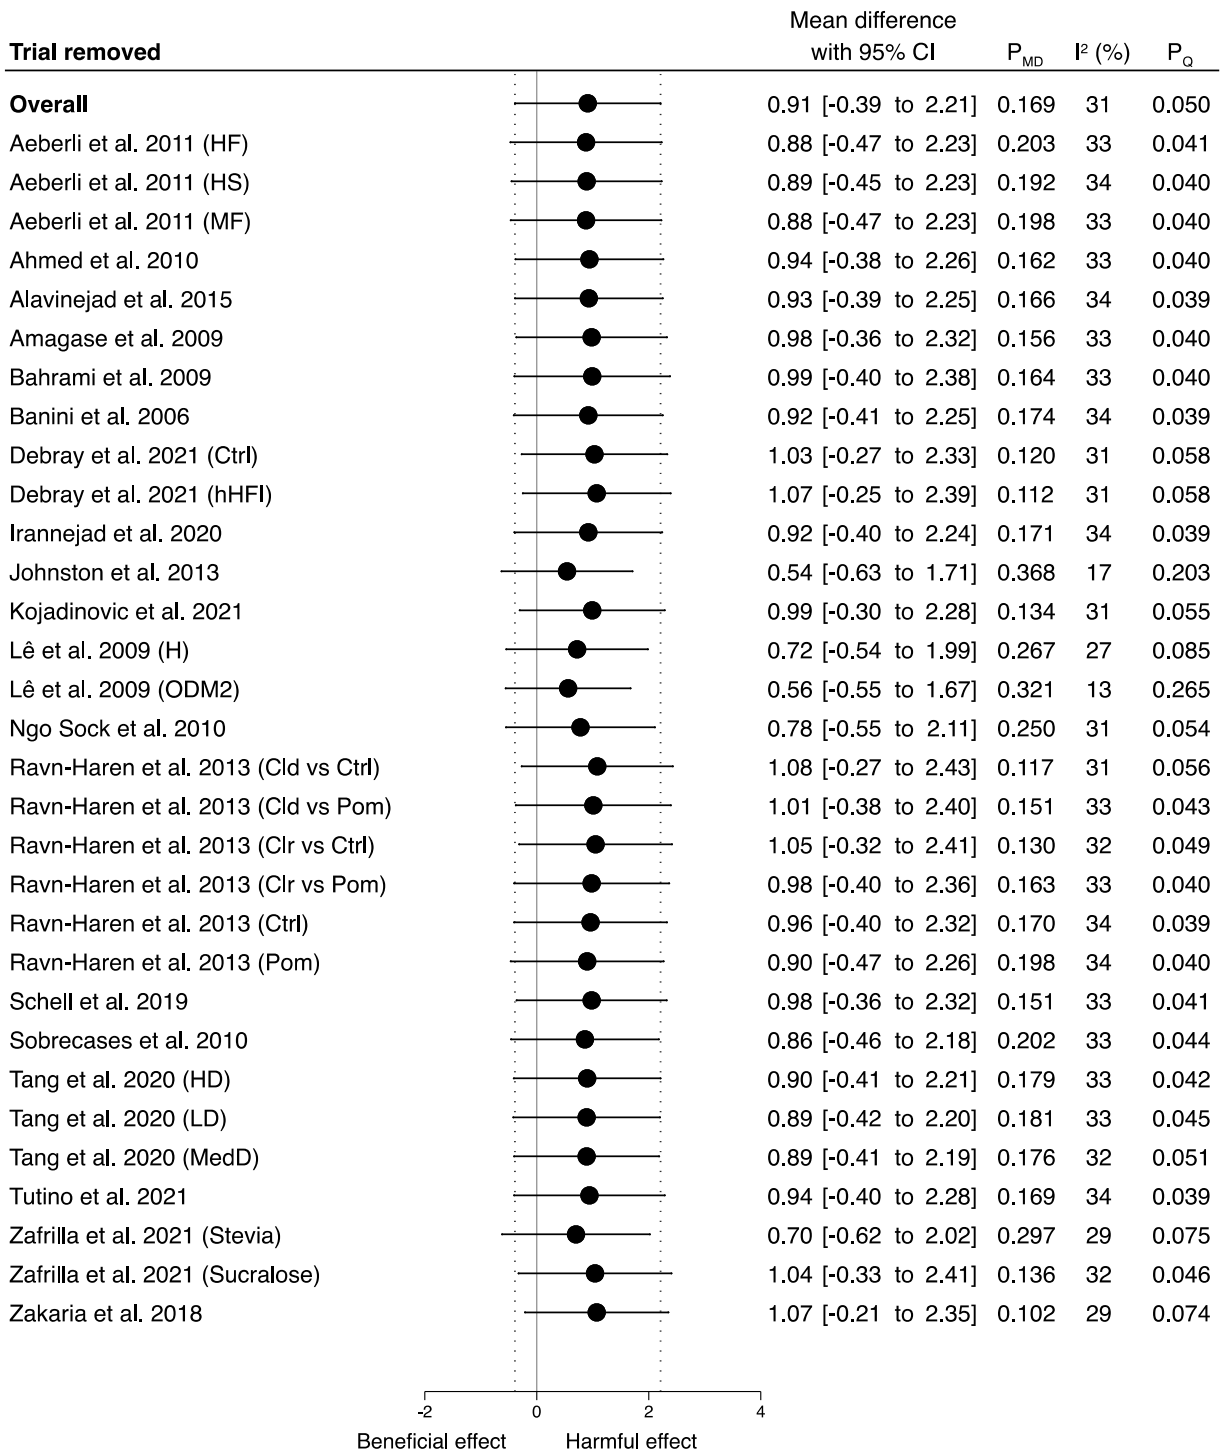

*Influence analysis: Removal of each trial, one at a time and recalculation of the overall effect and heterogeneity*

ALT=alanine aminotransferase; CI=confidence interval; Cld=cloudy apple juice; Clr=clear apple juice; Ctrl=control group; H=healthy; HD=high dose; HF=high fructose; hHFI=heterozygote high fructose intolerance; HS=high

sucrose; LD=low dose; MD=mean difference; MedD=medium dose; MF=medium fructose; ODM2=offspring of type-2 diabetes patients; Pom=apple pomace; SSB=sugar-sweetened beverage.

**Supplementary Figure S28: Sensitivity analysis of the systematic removal of each trial for the effect of important food sources of fructose-containing sugars and ALT (U/L) in subtraction trials**

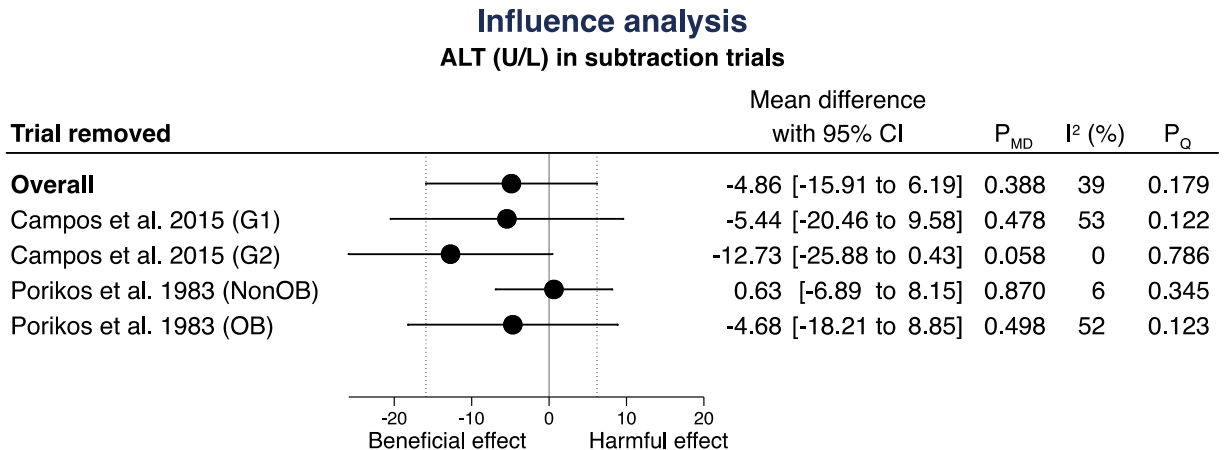

*Influence analysis: Removal of each trial, one at a time and recalculation of the overall effect and heterogeneity*

ALT=alanine aminotransferase; CI=confidence interval; G1=group 1; G2=group 2; MD=mean difference; NonOB=non-obese; OB=obese.

**Supplementary Figure S29: Sensitivity analysis of the systematic removal of each trial for the effect of important food sources of fructose-containing sugars and ALT (U/L) in ad libitum trials**

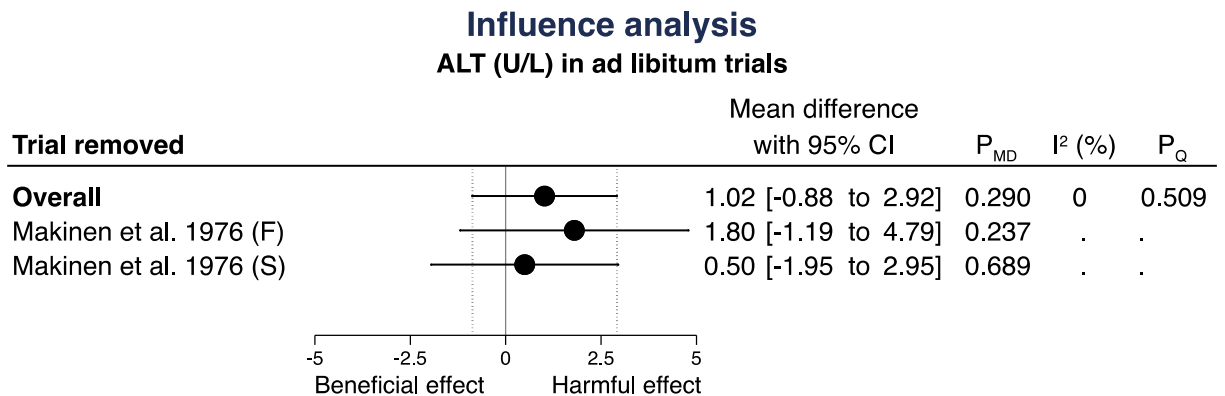

*Influence analysis: removal of each trial, one at a time and recalculation of the overall effect and heterogeneity*

ALT=alanine aminotransferase; CI=confidence interval; F=fructose; MD=mean difference; S=sucrose.

**Supplementary Figure S30: Sensitivity analysis of the systematic removal of each trial for the effect of important food sources of fructose-containing sugars and AST (U/L) in substitution trials**

**Influence analysis**  
**AST (U/L) in substitution trials**

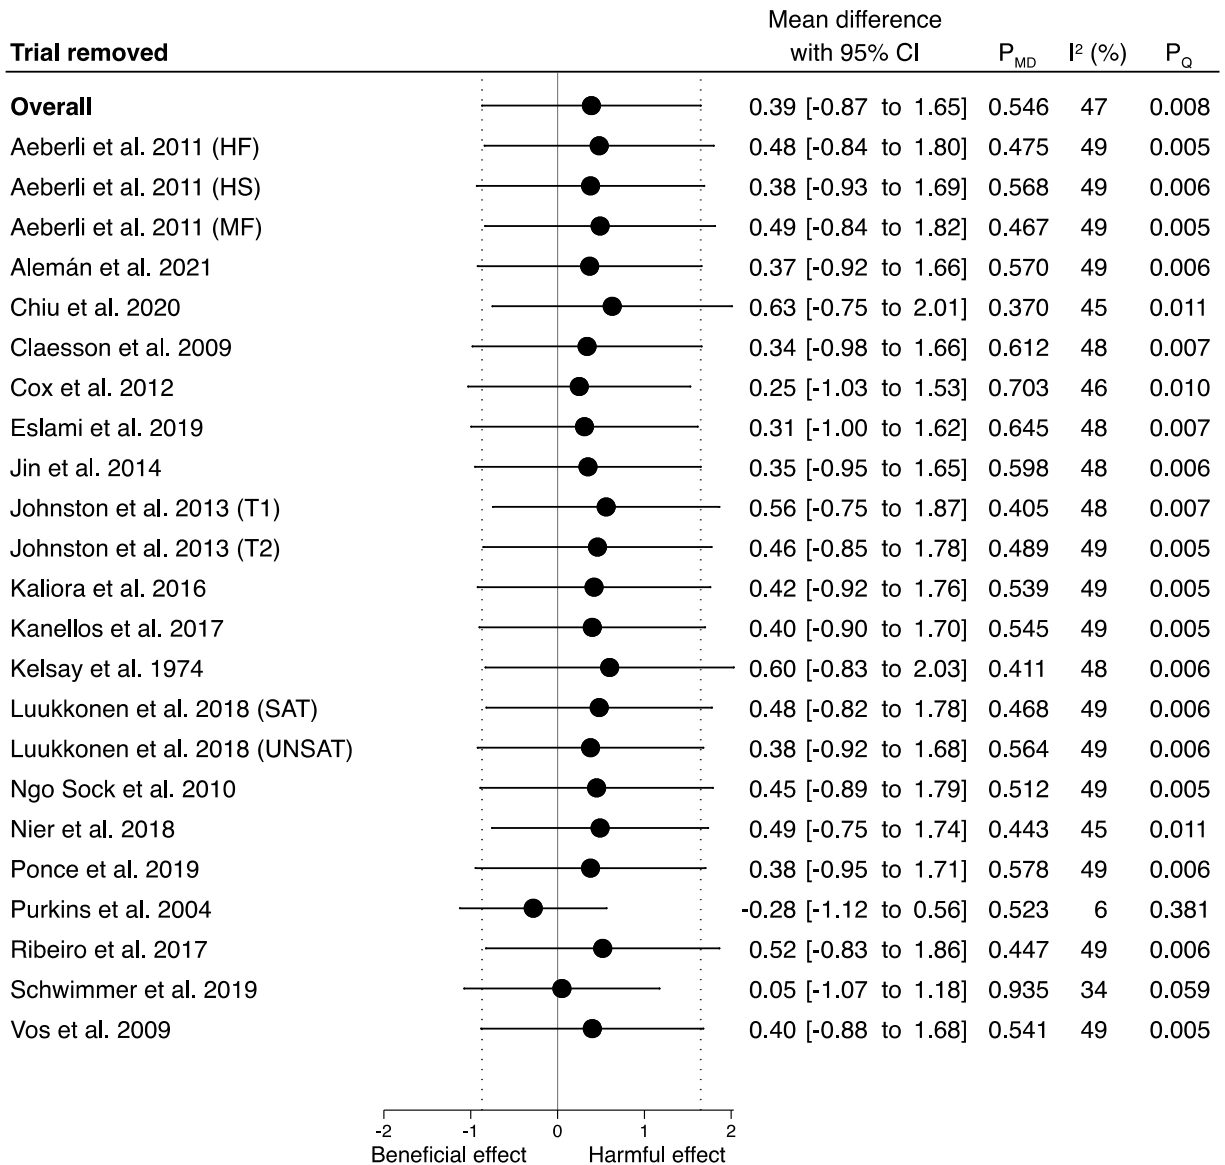

*Influence analysis: Removal of each trial, one at a time and recalculation of the overall effect and heterogeneity*

AST=aspartate aminotransferase; CI=confidence interval; HF=high fructose; HS=high sucrose; MD=mean difference; MF=medium fructose; SAT=saturated fat; T1=test group 1; T2=test group 2; UNSAT=unsaturated fat.



**Supplementary Figure S31: Sensitivity analysis of the systematic removal of each trial for the effect of important food sources of fructose-containing sugars and AST (U/L) in addition trials**

**Influence analysis**

**AST (U/L) in addition trials**

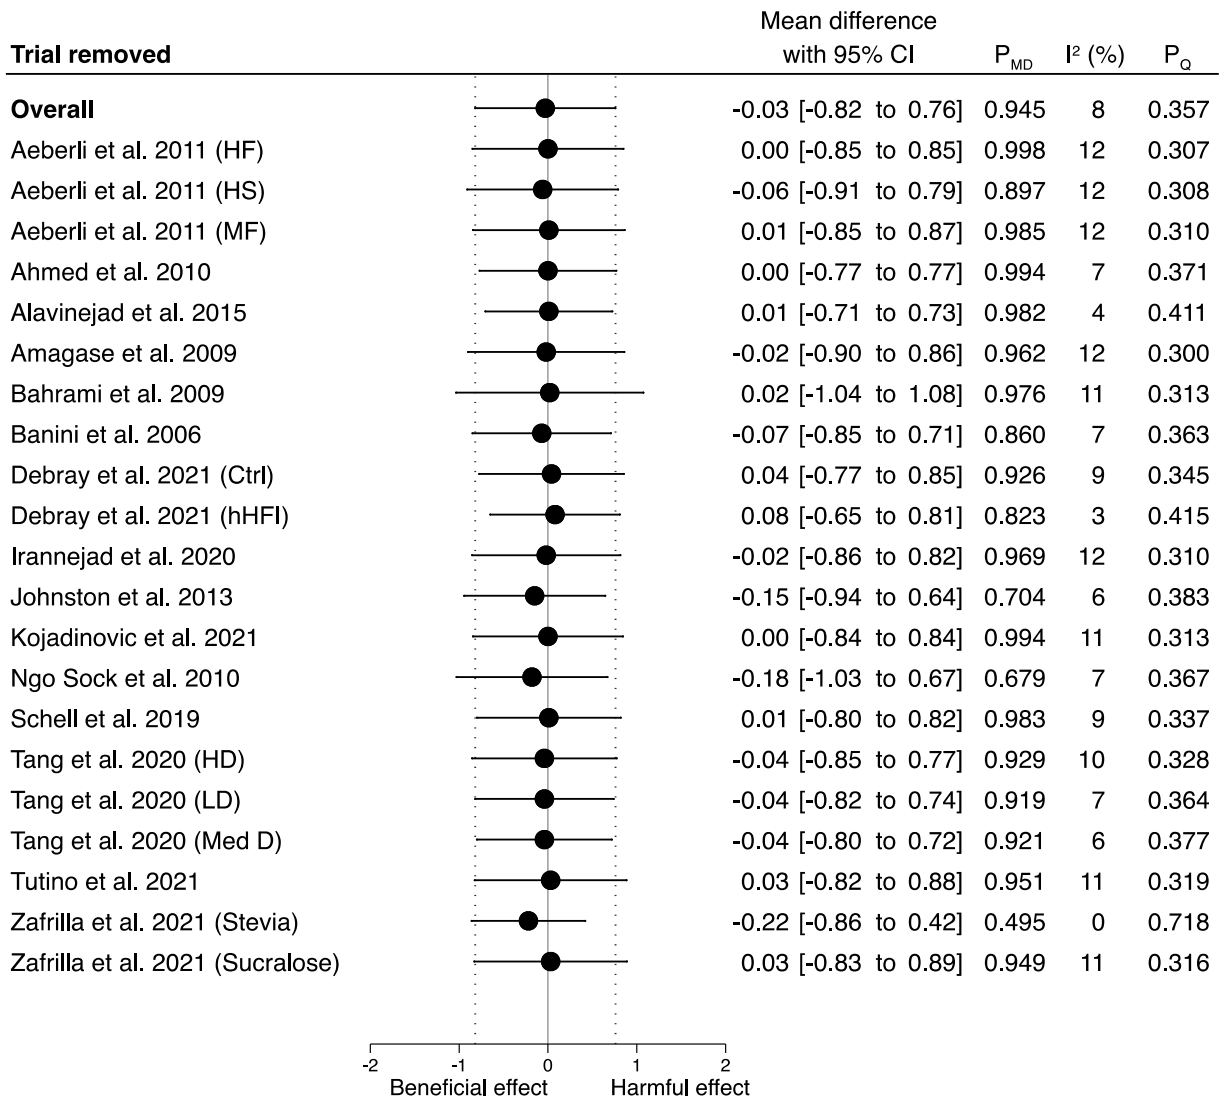

*Influence analysis: Removal of each trial, one at a time and recalculation of the overall effect and heterogeneity*

AST=aspartate aminotransferase; CI=confidence interval; Ctrl=control; HD=high dose; HF=high fructose; hHFI=heterozygote high fructose intolerance; HS=high sucrose; LD=low dose; MD=mean difference; Med D=medium dose; MF=medium fructose.

**Supplementary Figure S32: Sensitivity analysis of the systematic removal of each trial in the primary analysis of the effect of important food sources of fructose-containing sugars and AST (U/L) in subtraction trials**

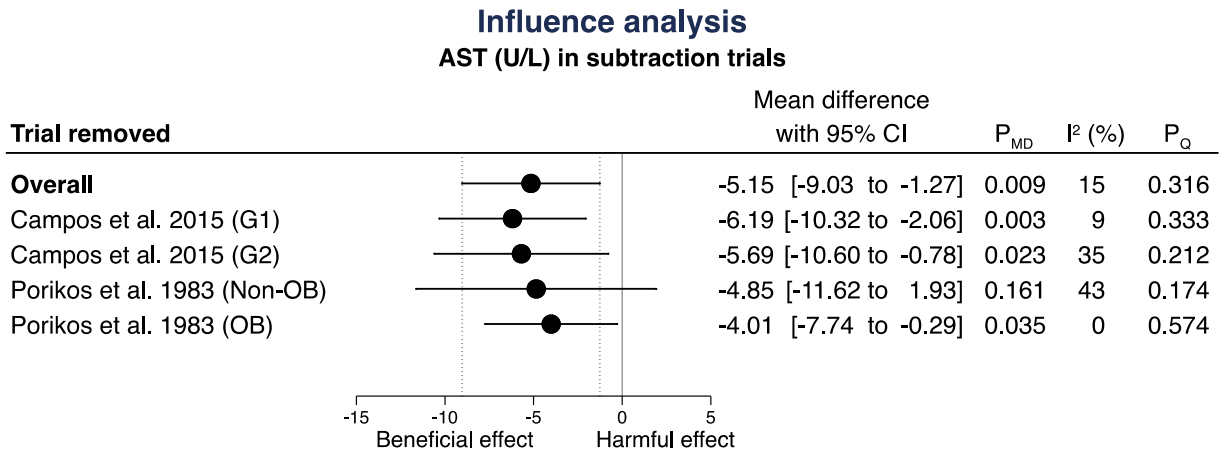

*Influence analysis: removal of each trial, one at a time and recalculation of the overall effect and heterogeneity*

AST=aspartate aminotransferase; CI=confidence interval; G1=group 1; G2=group 2; MD=mean difference; NonOB=non-obese; OB=obese.

**Supplementary Figure S33: Sensitivity analysis of the systematic removal of each trial in the primary analysis of the effect of important food sources of fructose-containing sugars and AST (U/L) in ad libitum trials**

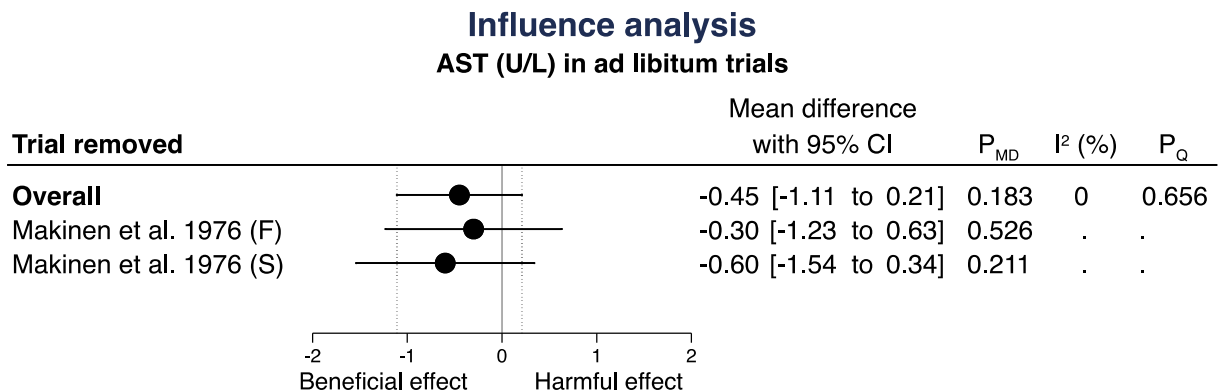

*Influence analysis: removal of each trial, one at a time and recalculation of the overall effect and heterogeneity*

AST=aspartate aminotransferase; CI, confidence interval; F=fructose; MD=mean difference; S=sucrose; SSB=sugar-sweetened beverage.

**Supplementary Figure S34: Sensitivity analysis of the systematic removal of each trial for the effect of SSBs on ALT (U/L) in addition trials**

**Influence analysis**  
**ALT (U/L) in addition SSB trials**

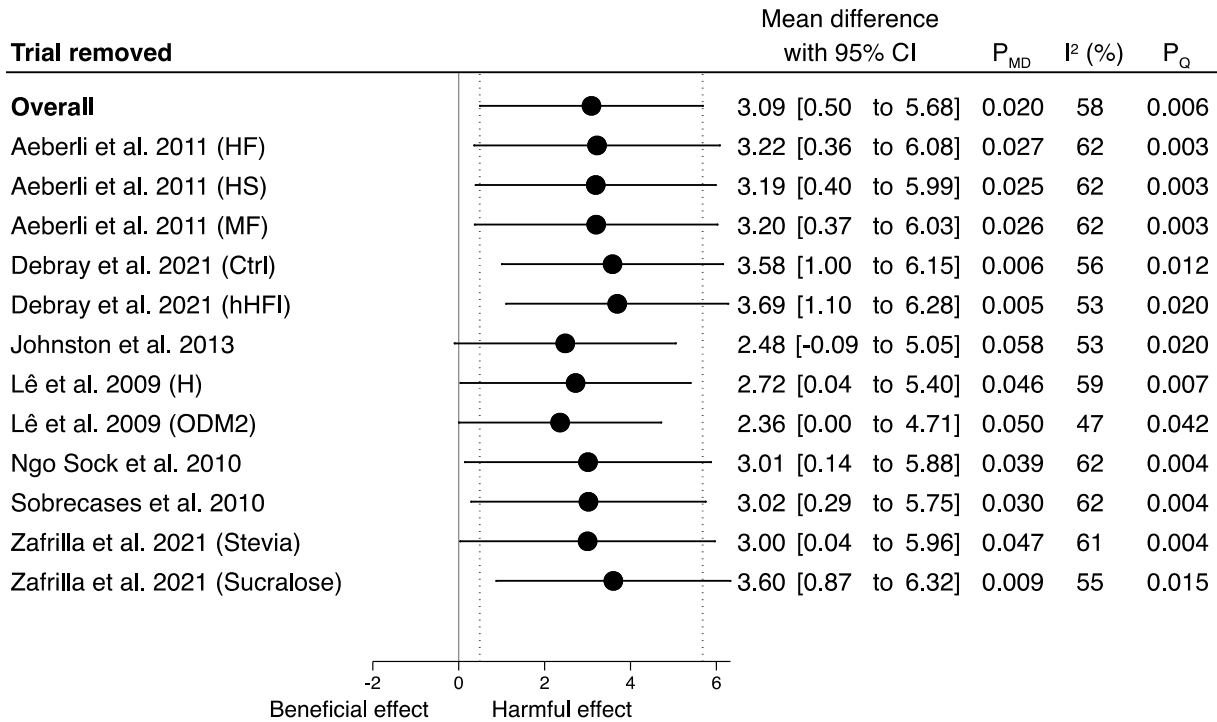

*Influence analysis: Removal of each trial, one at a time and recalculation of the overall effect and heterogeneity*

ALT=alanine aminotransferase; CI=confidence interval; Ctrl=control group; H=healthy; hHFI=heterozygote high fructose intolerance; HS=high sucrose; MD=mean difference; MF=medium fructose; ODM2=offspring of type-2 diabetes patients; SSB=sugar-sweetened beverage.

**Supplementary Figure S35: Sensitivity analysis of the systematic removal of each trial for the effect of 100% fruit juice on ALT (U/L) in addition trials**

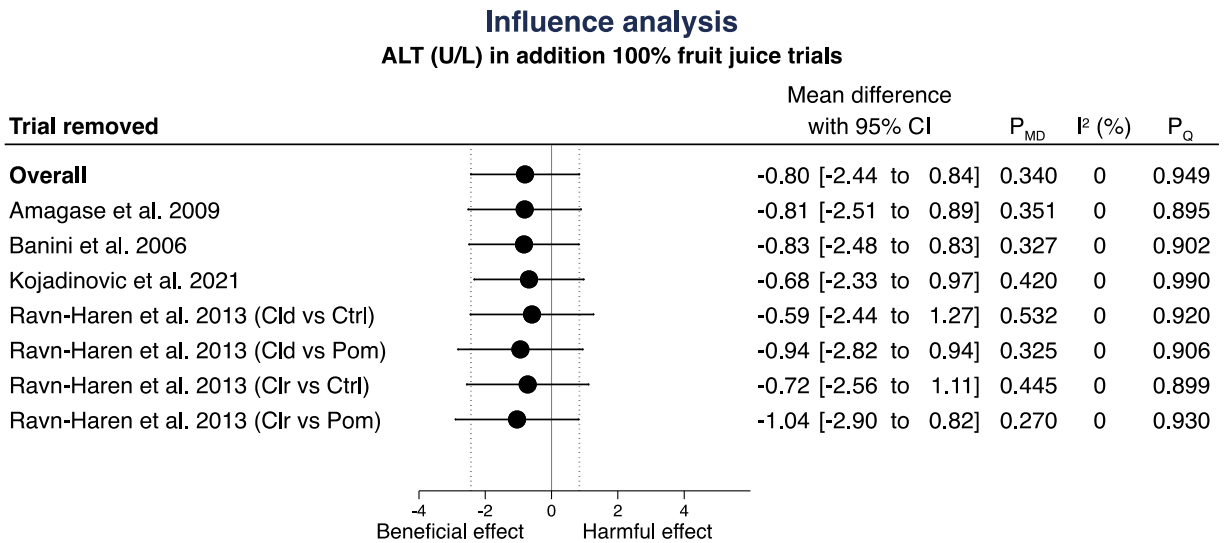

*Influence analysis: Removal of each trial, one at a time and recalculation of the overall effect and heterogeneity*

ALT=alanine aminotransferase; CI=confidence interval; Cld=cloudy apple juice; Clr=clear apple juice; Ctrl=control group; MD=mean difference; Pom=apple pomace.

**Supplementary Figure S36: Sensitivity analysis of the systematic removal of each trial for the effect of fruit on ALT (U/L) in addition trials**

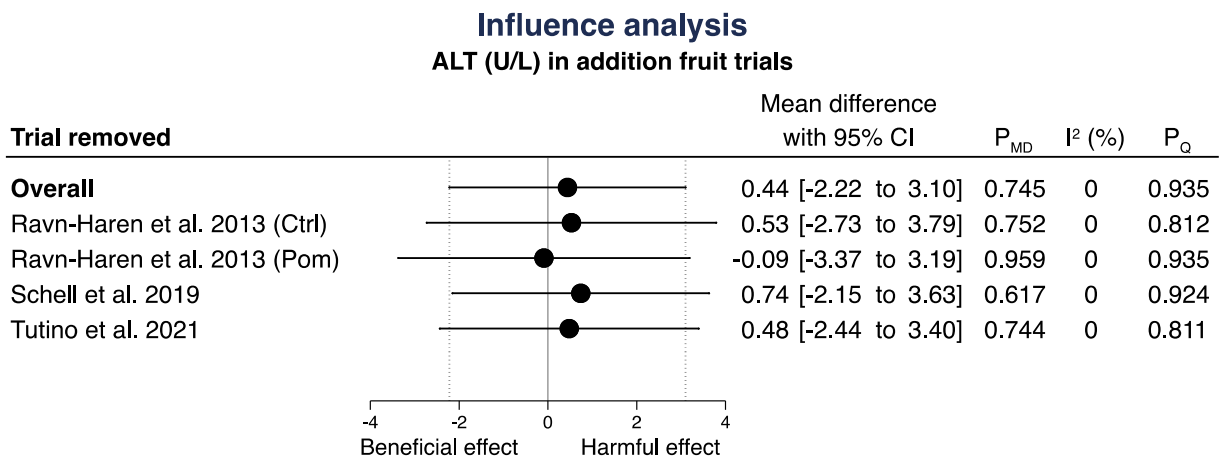

*Influence analysis: Removal of each trial, one at a time and recalculation of the overall effect and heterogeneity*

ALT=alanine aminotransferase; CI=confidence interval; Ctrl=control group; MD=mean difference; Pom=apple pomace.

**Supplementary Figure S37: Sensitivity analysis of the systematic removal of each trial for the effect of dried fruit on ALT (U/L) in addition trials**

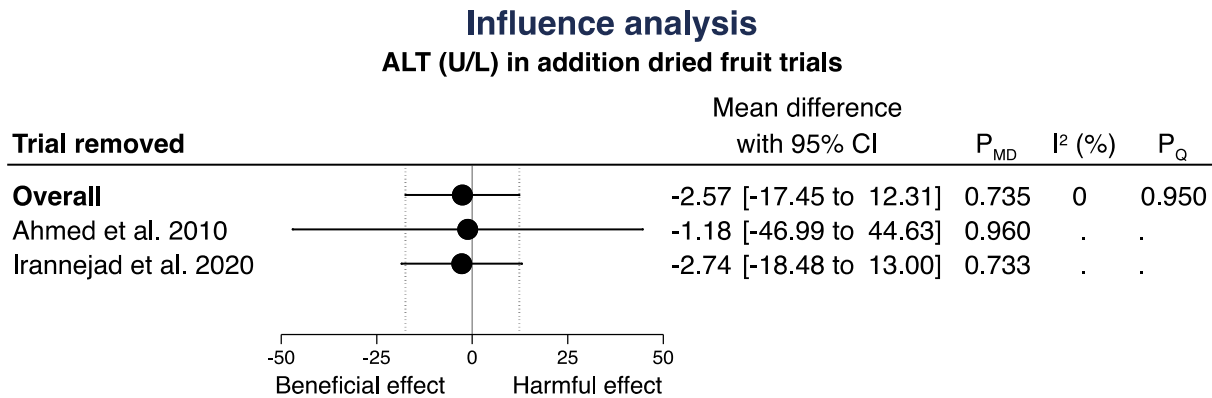

*Influence analysis: Removal of each trial, one at a time and recalculation of the overall effect and heterogeneity*

ALT=alanine aminotransferase; CI=confidence interval; MD=mean difference.

**Supplementary Figure S38: Sensitivity analysis of the systematic removal of each trial for the effect of honey on ALT (U/L) in addition trials**

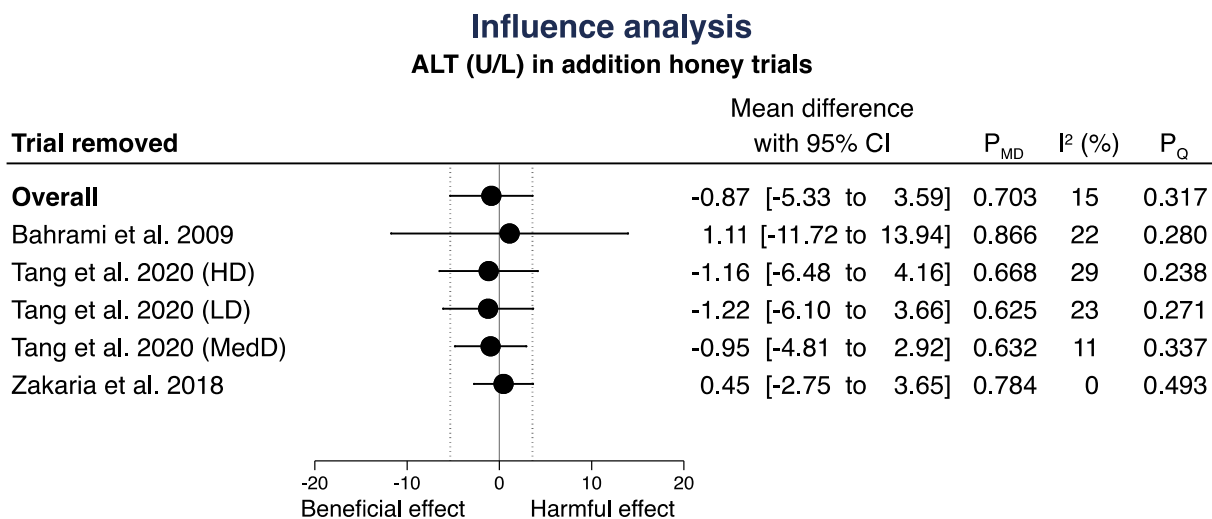

*Influence analysis: Removal of each trial, one at a time and recalculation of the overall effect and heterogeneity*

ALT=alanine aminotransferase; CI=confidence interval; HD=high dose; MD=mean difference; MedD=medium dose.

**Supplementary Figure S39: Sensitivity analysis of the systematic removal of each trial for the effect of SSBs on ALT (U/L) in subtraction trials**

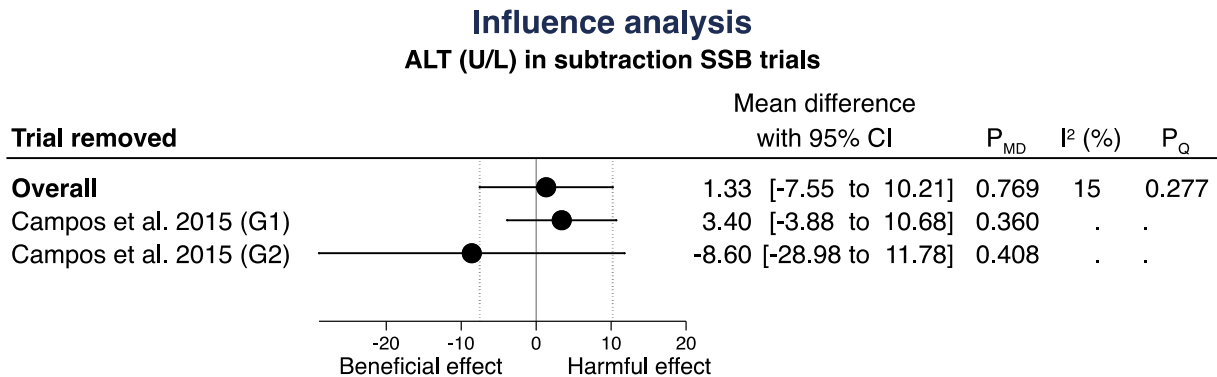

*Influence analysis: Removal of each trial, one at a time and recalculation of the overall effect and heterogeneity*

ALT=alanine aminotransferase; CI=confidence interval; G1=group 1; G2=group 2; MD=mean difference; SSB=sugar-sweetened beverage.

**Supplementary Figure S40: Sensitivity analysis of the systematic removal of each trial for the effect of mixed sources (with SSBs) on ALT (U/L) in subtraction trials**

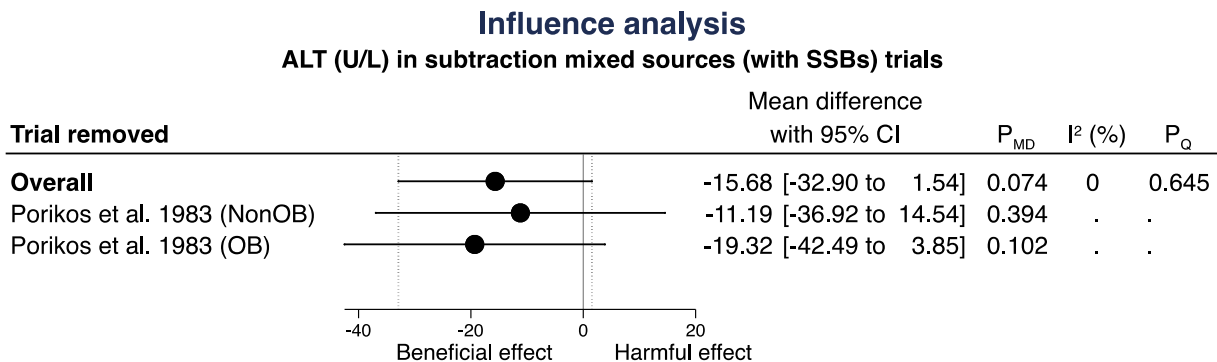

*Influence analysis: Removal of each trial, one at a time and recalculation of the overall effect and heterogeneity*

ALT=alanine aminotransferase; CI=confidence interval; G1=group 1; G2=group 2; MD=mean difference; NonOB=non-obese; OB=obese; SSB=sugar-sweetened beverage.

**Supplementary Figure S41: Sensitivity analysis of the systematic removal of each trial for the effect of SSBs on AST (U/L) in addition trials**

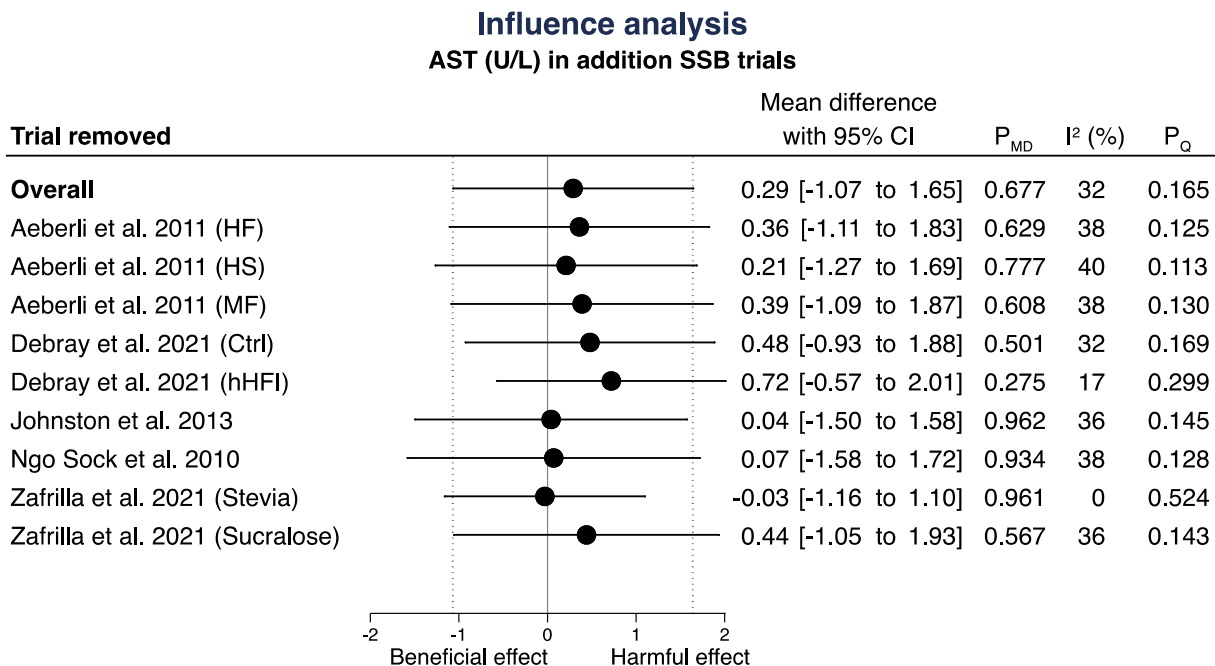

*Influence analysis: Removal of each trial, one at a time and recalculation of the overall effect and heterogeneity*

AST=aspartate aminotransferase; CI=confidence interval; Ctrl=control; HD=high dose; HF=high fructose; hHFI=heterozygote high fructose intolerance; HS=high sucrose; MD=mean difference; SSB=sugar-sweetened beverage.

**Supplementary Figure S42: Sensitivity analysis of the systematic removal of each trial for the effect of 100% fruit juice on AST (U/L) in addition trials**

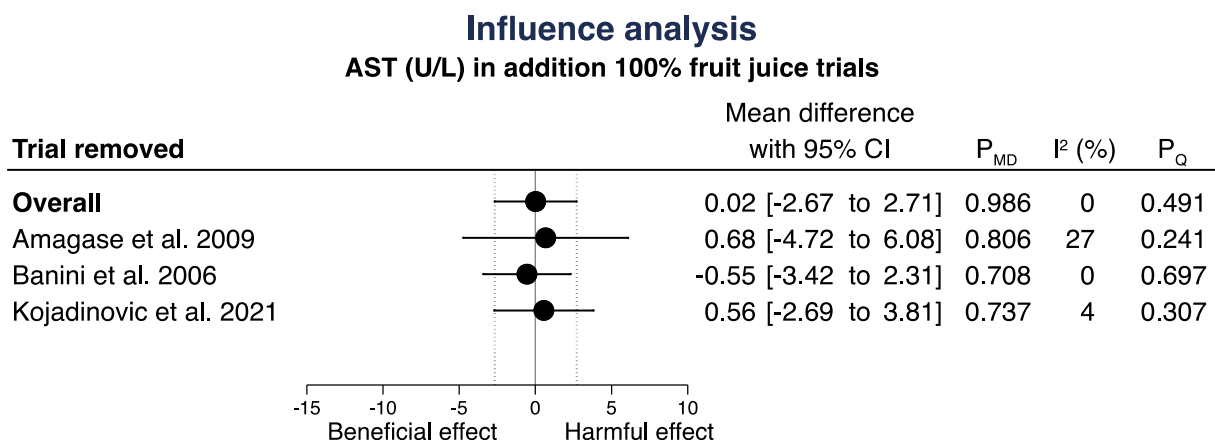

*Influence analysis: Removal of each trial, one at a time and recalculation of the overall effect and heterogeneity*

AST=aspartate aminotransferase; CI=confidence interval; MD=mean difference.

**Supplementary Figure S43: Sensitivity analysis of the systematic removal of each trial for the effect of fruit on AST (U/L) in addition trials**

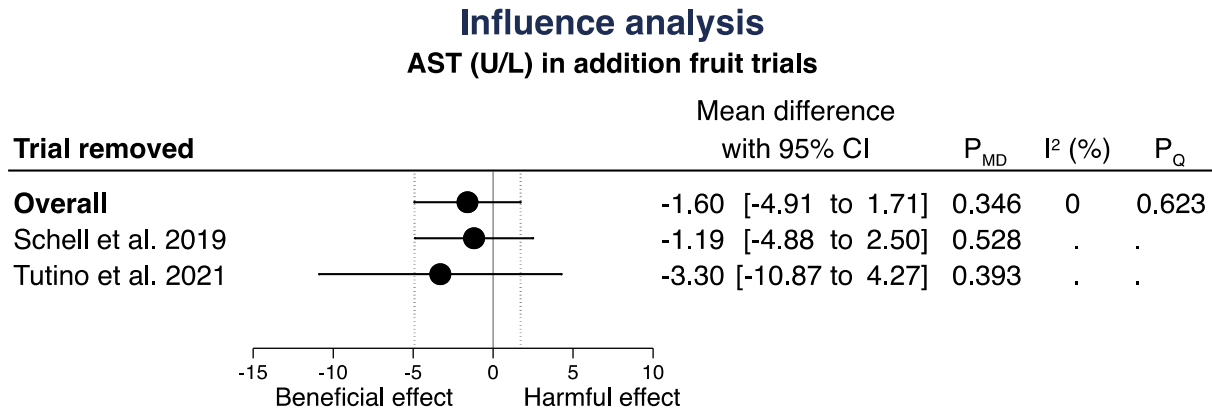

*Influence analysis: Removal of each trial, one at a time and recalculation of the overall effect and heterogeneity*

AST=aspartate aminotransferase; CI=confidence interval; MD=mean difference.

**Supplementary Figure S44: Sensitivity analysis of the systematic removal of each trial for the effect of dried fruit on AST (U/L) in addition trials**

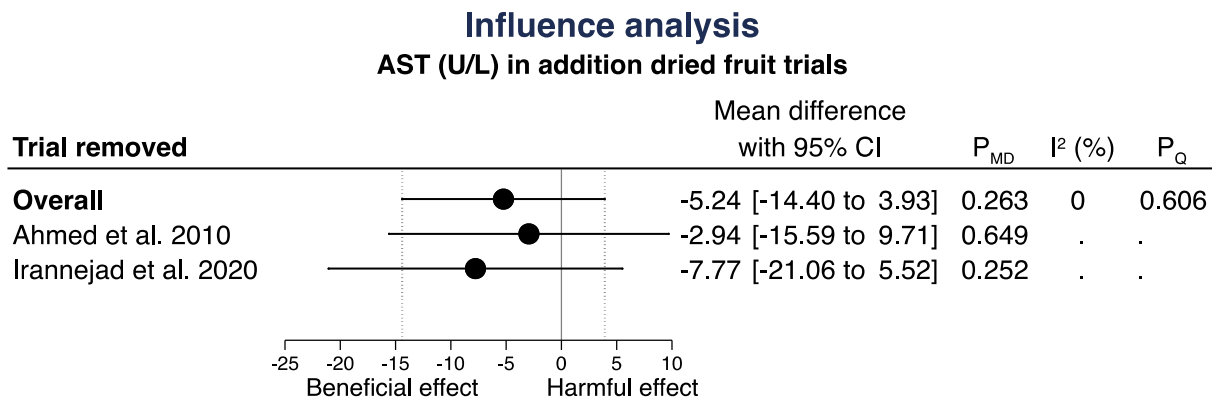

*Influence analysis: Removal of each trial, one at a time and recalculation of the overall effect and heterogeneity*

AST=aspartate aminotransferase; CI=confidence interval; MD=mean difference.



**Supplementary Figure S45: Sensitivity analysis of the systematic removal of each trial for the effect of honey on AST (U/L) in addition trials**

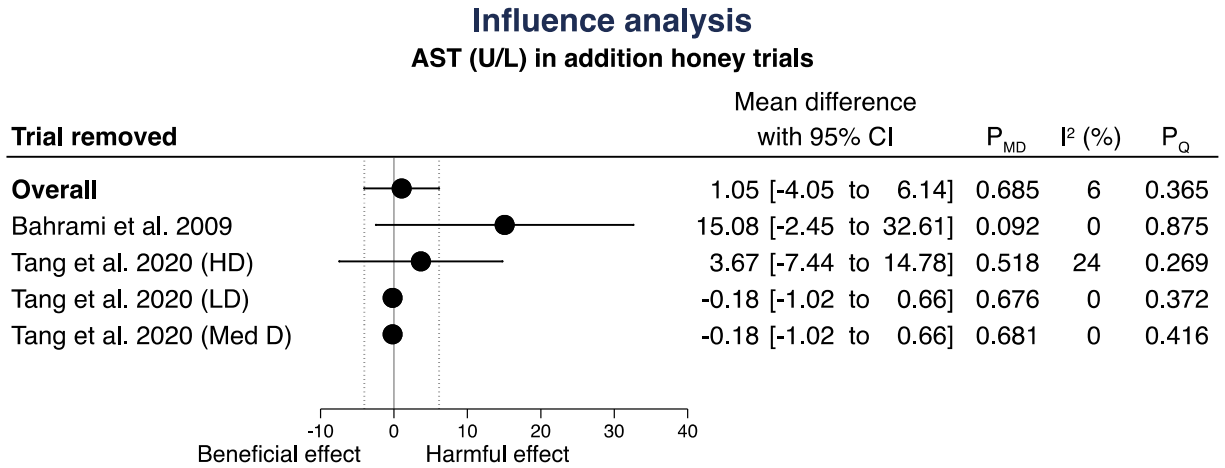

*Influence analysis: Removal of each trial, one at a time and recalculation of the overall effect and heterogeneity*

AST=aspartate aminotransferase; CI=confidence interval; HD=high dose; LD=low dose; MD=mean difference; Med D=medium dose.

**Supplementary Figure S46: Sensitivity analysis of the systematic removal of each trial for the effect of SSB on AST (U/L) in subtraction trials**

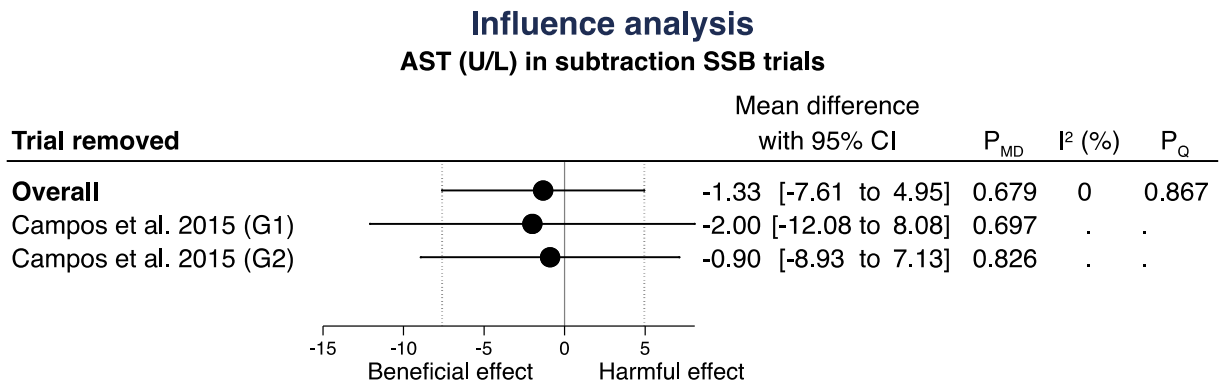

*Influence analysis: Removal of each trial, one at a time and recalculation of the overall effect and heterogeneity*

AST=aspartate aminotransferase; CI=confidence interval; G1=group 1; G2=group 2; MD=mean difference; SSB=sugar-sweetened beverage.

Supplementary Figure S47: Sensitivity analysis of the systematic removal of each trial for the effect of mixed sources (with SSBs) on AST (U/L) in subtraction trials

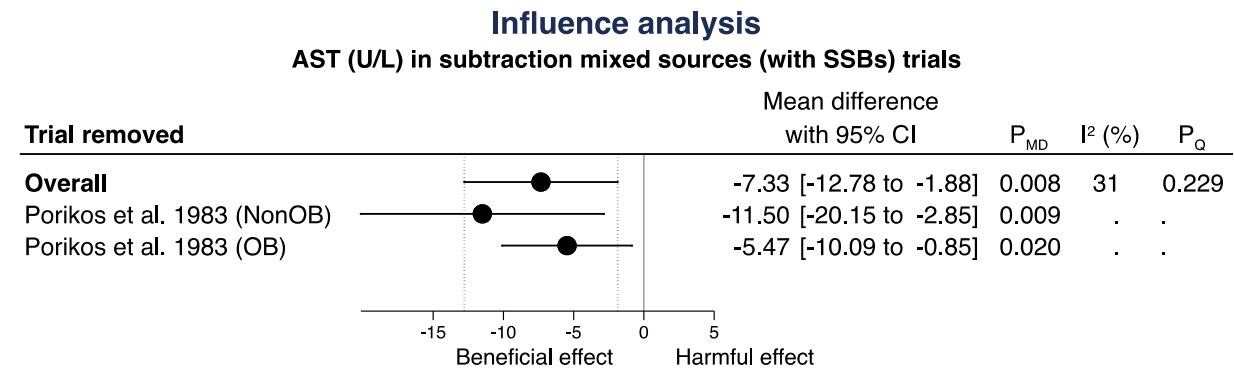

*Influence analysis: Removal of each trial, one at a time and recalculation of the overall effect and heterogeneity*

AST=aspartate aminotransferase; CI=confidence interval; MD=mean difference; NonOB=non-obese; SSB=sugar-sweetened beverage; OB=obese.

# **Supplementary Figure S48 (part 1 of 3): Subgroup analyses for the effect of important food sources of fructose-containing sugars and IHCL (SMD) in substitution trials**

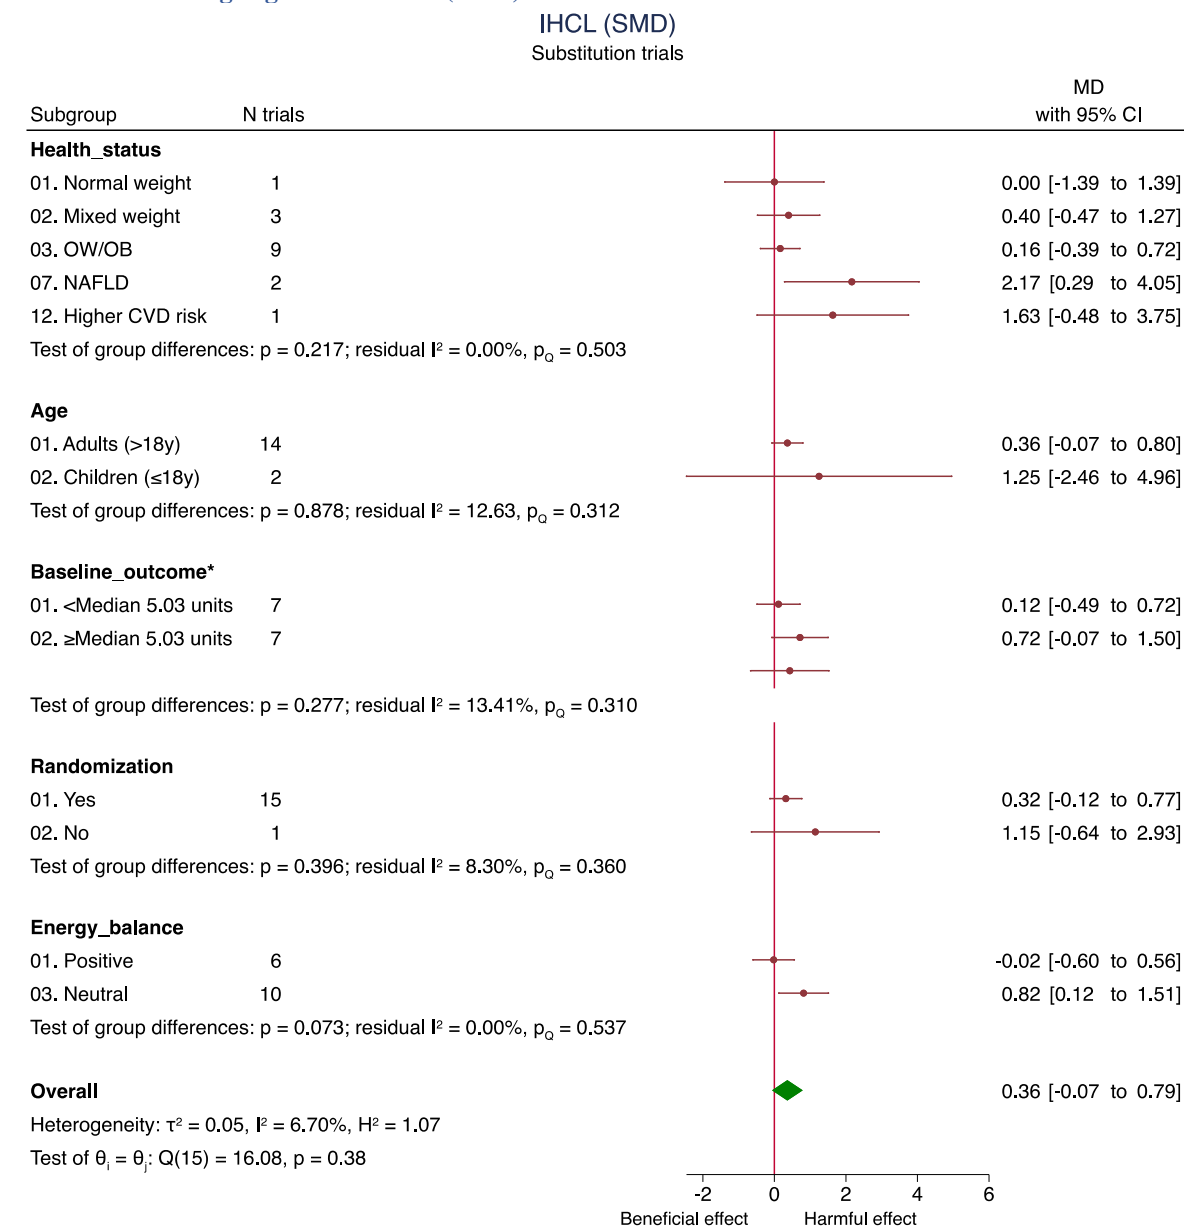

Test of  $\theta = 0$ :  $z = 1.656$ ,  $p = 0.098$

\*N=2 trials missing data for baseline IHCL.

The green diamond represents the pooled estimate for the overall primary analysis of food sources of fructose-containing sugars and IHCL. Within subgroup mean differences are the pooled effect estimates represented by a red circle. 95% confidence intervals are represented by the line through the circle. Data are expressed as mean differences with 95% confidence intervals using the generic inverse-variance method and random effects DerSimonian-Laird model. Inter-study heterogeneity was assessed using the Cochrane Q statistic and quantified using the  $I^2$  statistic, with significance set at  $p < 0.100$  and  $I^2 \geq 50\%$  considered to be evidence of substantial heterogeneity.  $p < 0.050$  indicates that the effect size differed between levels of the subgroup.

CI=confidence interval; CVD=cardiovascular disease; IHCL=intrahepatocellular lipid; MD=mean difference; N=number; NAFLD=non-alcoholic fatty liver disease; OW/OB=overweight or obese; SMD=standardized mean difference; y=years.

**Supplementary Figure S48 (part 2 of 3): Subgroup analyses for the effect of important food sources of fructose-containing sugars and IHCL (SMD) in substitution trials**

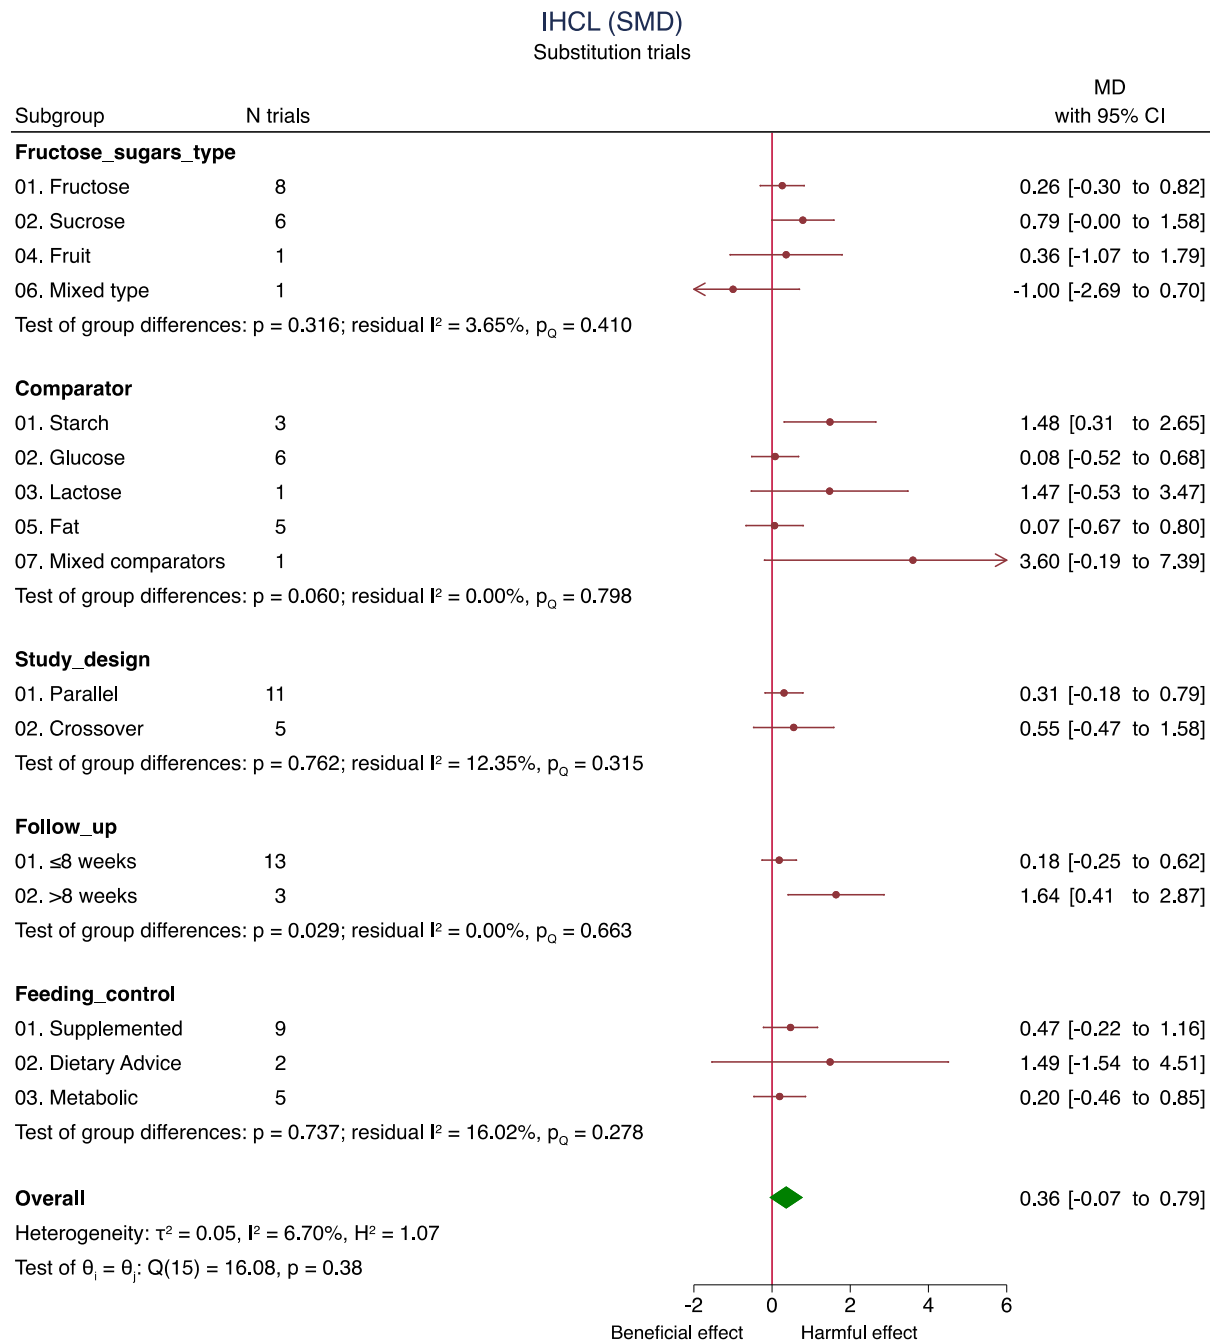

Test of  $\theta = 0$ :  $z = 1.656$ ,  $p = 0.098$

The green diamond represents the pooled estimate for the overall primary analysis of food sources of fructose-containing sugars and IHCL. Within subgroup mean differences are the pooled effect estimates represented by a red circle. 95% confidence intervals are represented by the line through the circle. Data are expressed as mean differences with 95% confidence intervals using the generic inverse-variance method and random effects DerSimonian-Laird model. Inter-study heterogeneity was assessed using the Cochrane Q statistic and quantified using the  $I^2$  statistic, with significance set at  $p < 0.100$  and  $I^2 \geq 50\%$  considered to be evidence of substantial heterogeneity.  $p < 0.050$  indicates that the effect size differed between levels of the subgroup. CI=confidence interval; IHCL=intrahepatocellular lipid; MD=mean difference; N=number; SMD=standardized mean difference.

# **Supplementary Figure S48 (part 3 of 3): Subgroup analyses for the effect of important food sources of fructose-containing sugars and IHCL (SMD) in substitution trials**

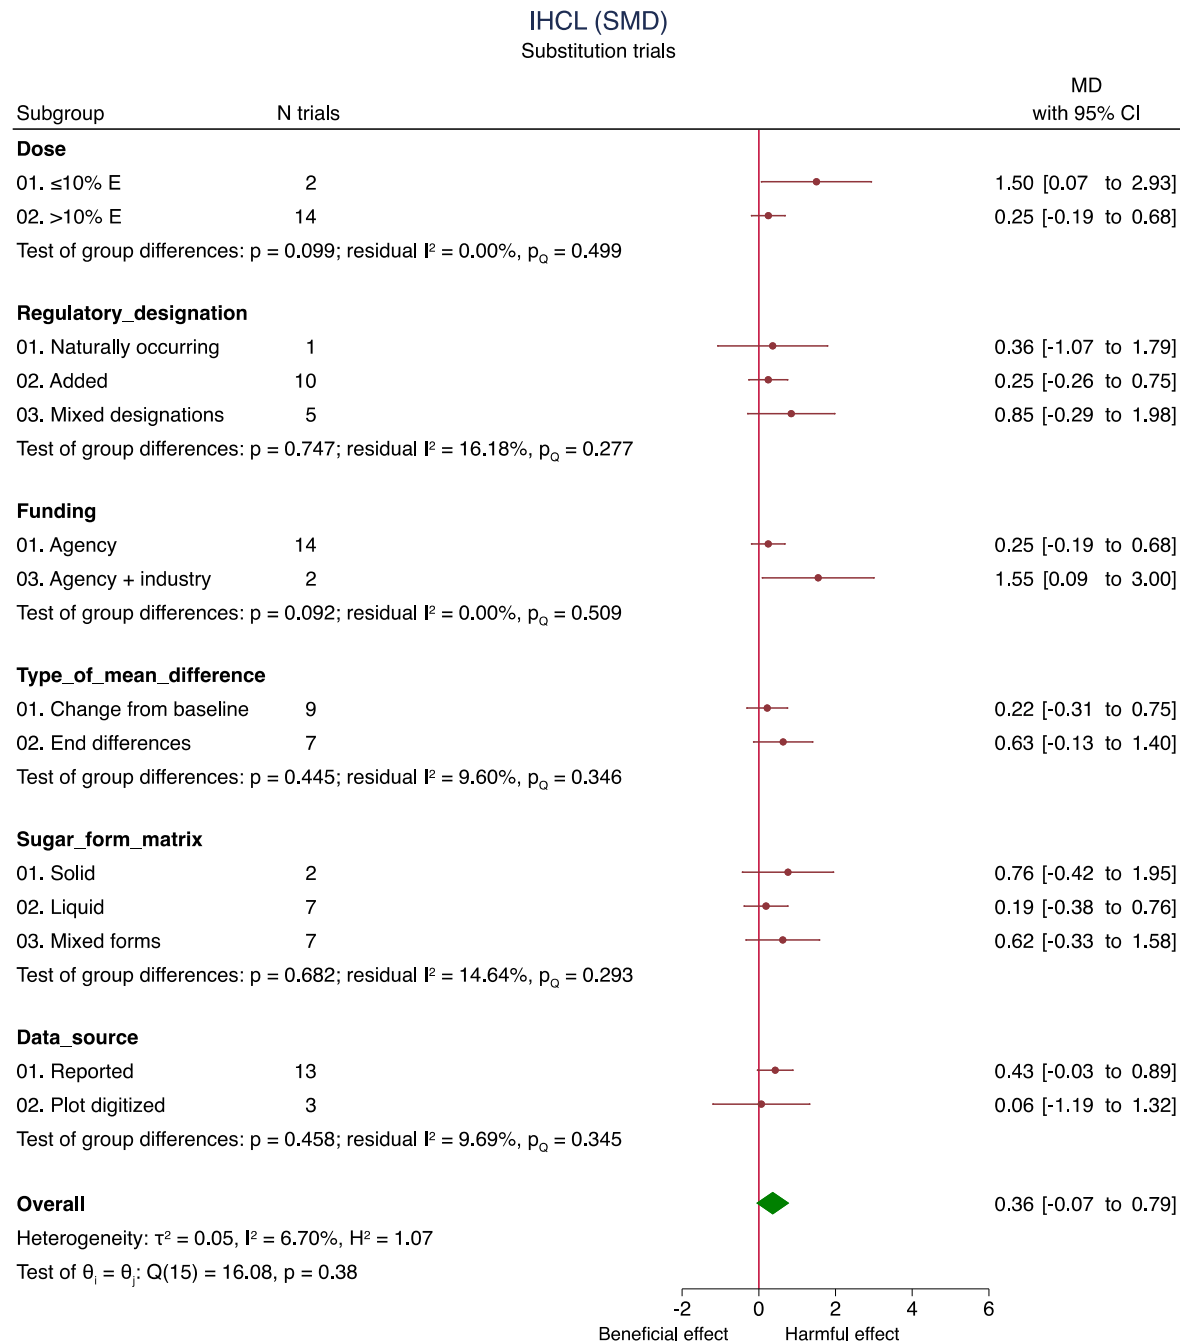

Test of  $\theta = 0$ :  $z = 1.656$ ,  $p = 0.098$

The green diamond represents the pooled estimate for the overall primary analysis of food sources of fructose-containing sugars and IHCL. Within subgroup mean differences are the pooled effect estimates represented by a red circle. 95% confidence intervals are represented by the line through the circle. Data are expressed as mean differences with 95% confidence intervals using the generic inverse-variance method and random effects DerSimonian-Laird model. Inter-study heterogeneity was assessed using the Cochrane Q statistic and quantified using the  $I^2$  statistic, with significance set at  $p < 0.100$  and  $I^2 \geq 50\%$  considered to be evidence of substantial heterogeneity.  $p < 0.050$  indicates that the effect size differed between levels of the subgroup. CI=confidence interval; E=energy; IHCL=intrahepatocellular lipid; MD=mean difference; N=number; SMD=standardized mean difference.

**Supplementary Figure S49: Risk of bias (using The Cochrane Collaboration Tool) subgroup analysis for the effect of important food sources of fructose-containing sugars and IHCL (SMD) in substitution trials**

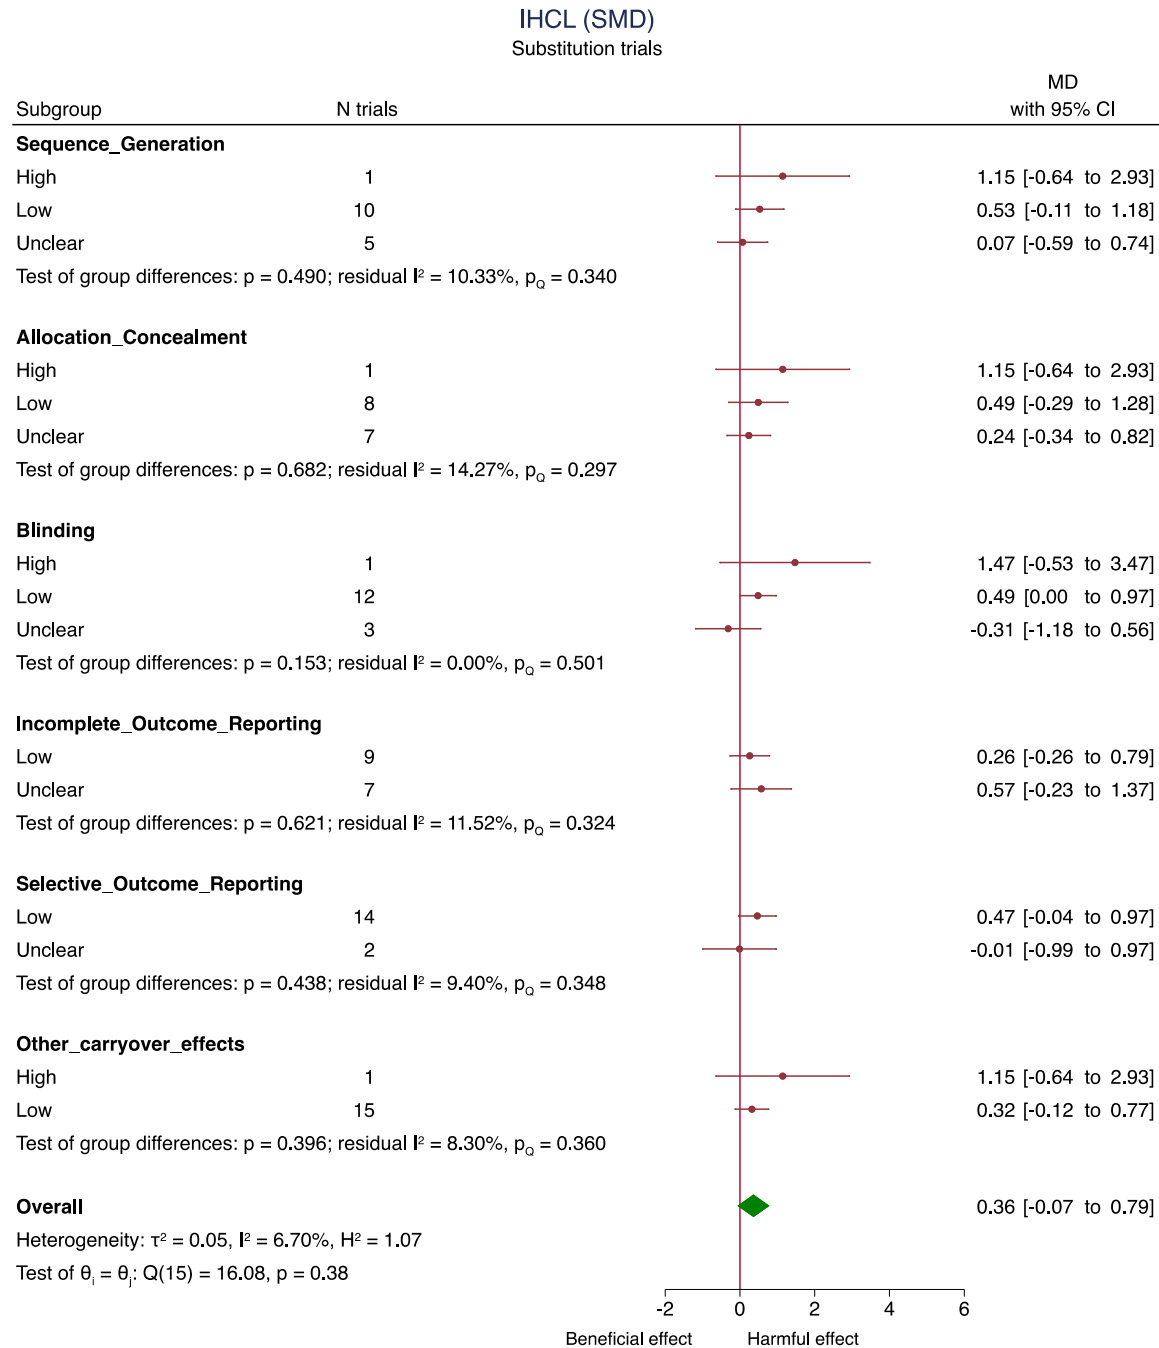

Test of  $\theta = 0$ :  $z = 1.656$ ,  $p = 0.098$

The green diamond represents the pooled estimate for the overall primary analysis of food sources of fructose-containing sugars and IHCL. Within subgroup mean differences are the pooled effect estimates represented by a red circle. 95% confidence intervals are represented by the line through the circle. Data are expressed as mean differences with 95% confidence intervals using the generic inverse-variance method and random effects DerSimonian-Laird model. Inter-study heterogeneity was assessed using the  $I^2$  statistic, with significance set at  $p < 0.100$  and  $I^2 \geq 50\%$  considered to be evidence of substantial heterogeneity.  $p < 0.050$  indicates that the effect size differed between levels of the subgroup.

CI=confidence interval; IHCL=intrahepatocellular lipid; MD=mean difference; N=number; SMD=standardized mean difference.

**Supplementary Figure S50 (part 1 of 3): Subgroup analyses for the effect of important food sources of fructose-containing sugars and IHCL (SMD) in addition trials**

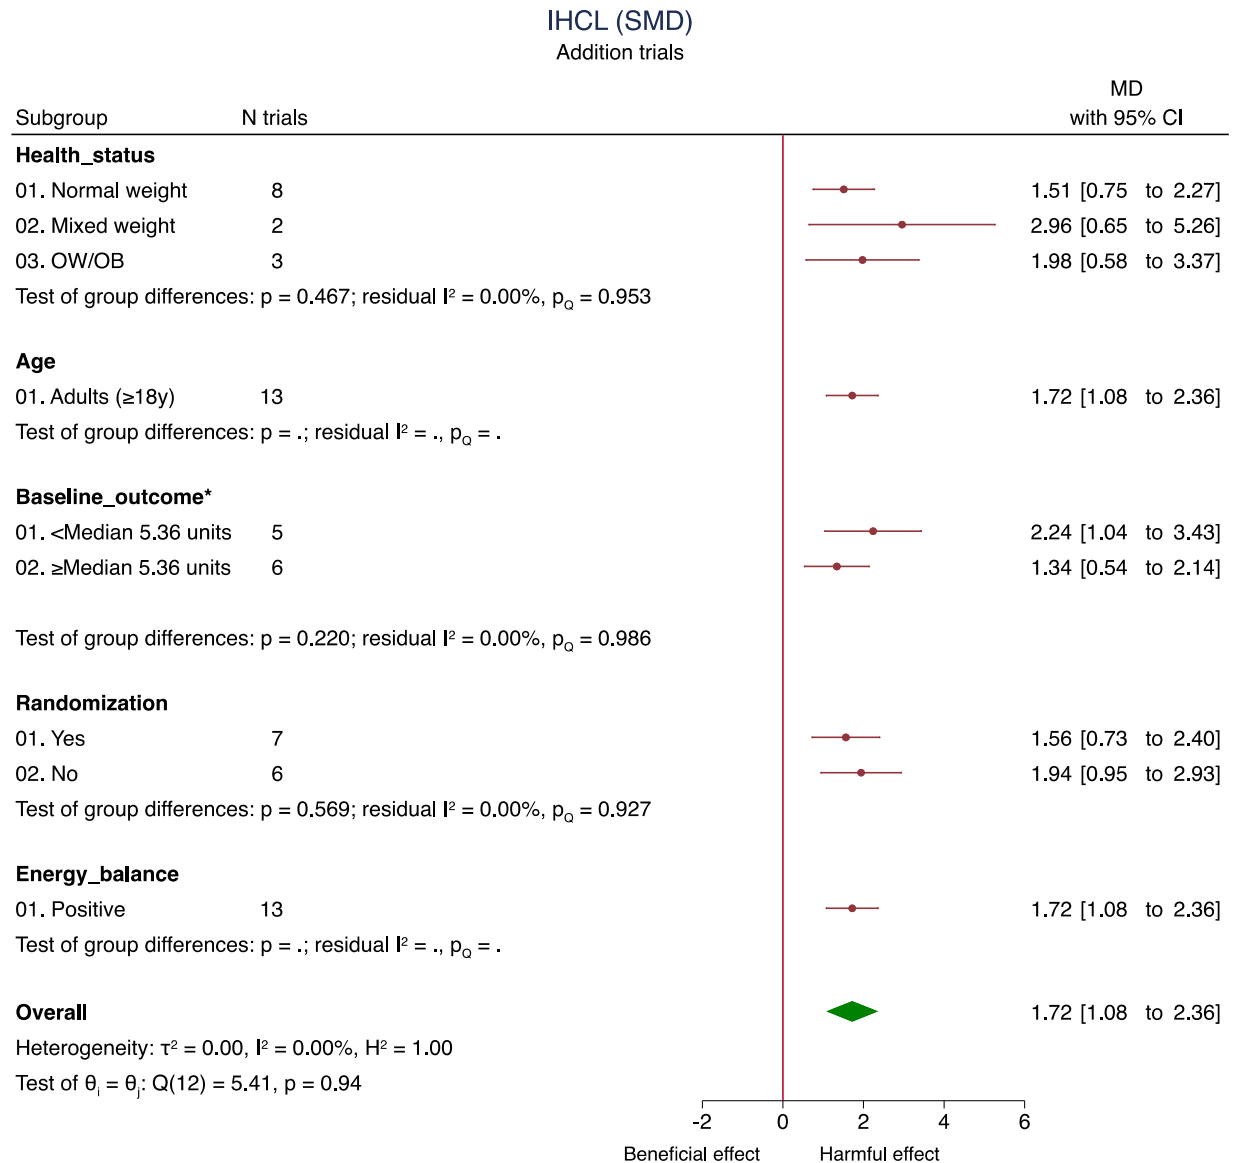

Test of  $\theta = 0$ :  $z = 5.272$ ,  $p = 0.000$

The green diamond represents the pooled estimate for the overall primary analysis of food sources of fructose-containing sugars and IHCL. Within subgroup mean differences are the pooled effect estimates represented by a red circle. 95% confidence intervals are represented by the line through the circle. Data are expressed as mean differences with 95% confidence intervals using the generic inverse-variance method and random effects DerSimonian-Laird model. Inter-study heterogeneity was assessed using the Cochrane Q statistic and quantified using the  $I^2$  statistic, with significance set at  $p < 0.100$  and  $I^2 \geq 50\%$  considered to be evidence of substantial heterogeneity.  $p < 0.050$  indicates that the effect size differed between levels of the subgroup.

\*N=2 trials missing data for baseline IHCL.

CI=confidence interval; IHCL=intrahepatocellular lipid; MD=mean difference; N=number; OW/OB=overweight or obese; SMD=standardized mean difference; y=years.

**Supplementary Figure S50 (part 2 of 3): A priori subgroup analyses for the effect of important food sources of fructose-containing sugars and IHCL (SMD) in addition trials**

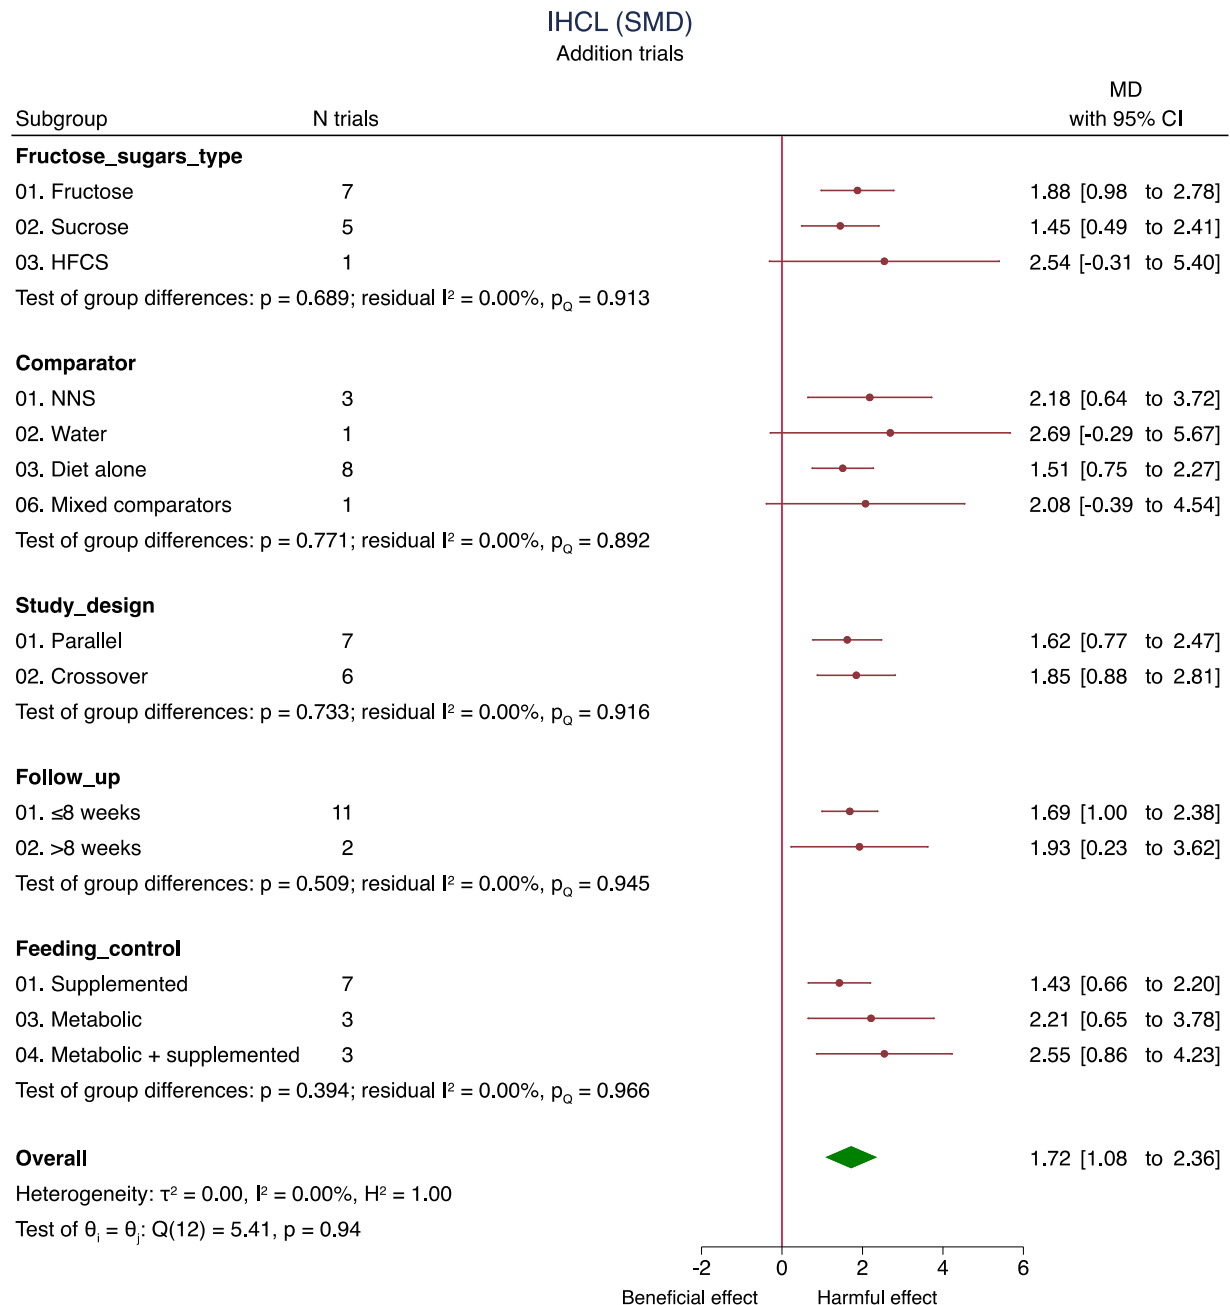

Test of  $\theta = 0$ :  $z = 5.272$ ,  $p = 0.000$

The green diamond represents the pooled estimate for the overall primary analysis of food sources of fructose-containing sugars and IHCL. Within subgroup mean differences are the pooled effect estimates represented by a red circle. 95% confidence intervals are represented by the line through the circle. Data are expressed as mean differences with 95% confidence intervals using the generic inverse-variance method and random effects DerSimonian-Laird model. Inter-study heterogeneity was assessed using the Cochrane Q statistic and quantified using the  $I^2$  statistic, with significance set at  $p < 0.100$  and  $I^2 \geq 50\%$  considered to be evidence of substantial heterogeneity.  $p < 0.050$  indicates that the effect size differed between levels of the subgroup. CI=confidence interval; IHCL=intrahepatocellular lipid; MD=mean difference; NNS=non-nutritive sweetener; N=number; SMD=standardized mean difference.



**Supplementary Figure S50 (part 3 of 3): A priori subgroup analyses for the effect of important food sources of fructose-containing sugars and IHCL (SMD) in addition trials**

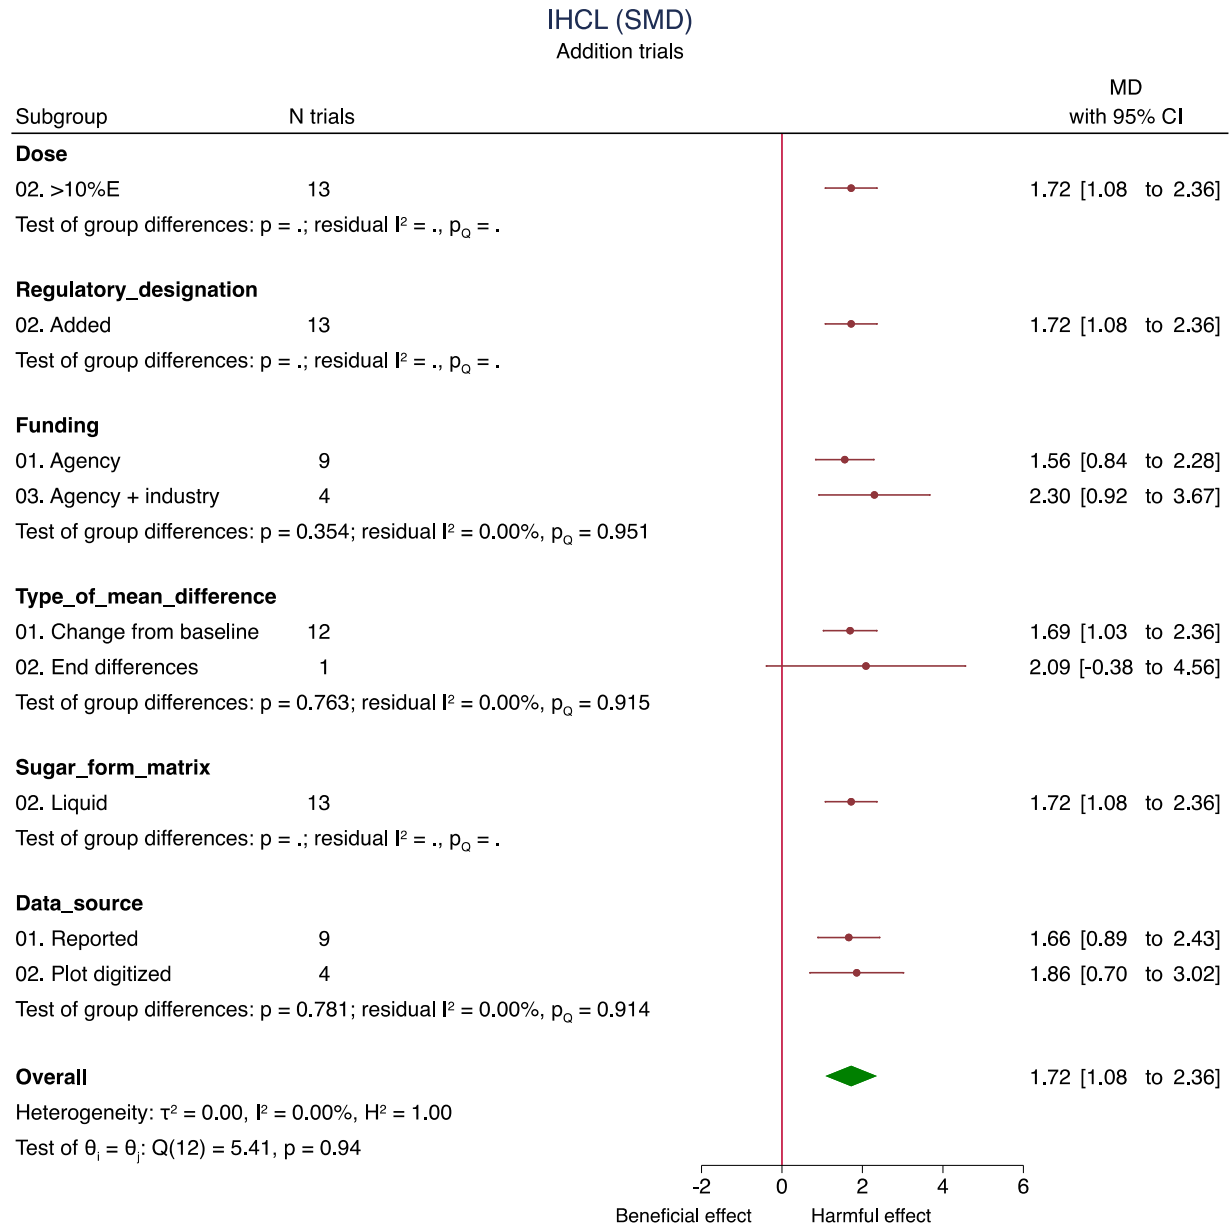

Test of  $\theta = 0$ :  $z = 1.656$ ,  $p = 0.098$

The green diamond represents the pooled estimate for the overall primary analysis of food sources of fructose-containing sugars and IHCL. Within subgroup mean differences are the pooled effect estimates represented by a red circle. 95% confidence intervals are represented by the line through the circle. Data are expressed as mean differences with 95% confidence intervals using the generic inverse-variance method and random effects DerSimonian-Laird model. Inter-study heterogeneity was assessed using the Cochran Q statistic and quantified using the  $I^2$  statistic, with significance set at  $p < 0.100$  and  $I^2 \geq 50\%$  considered to be evidence of substantial heterogeneity.  $p < 0.050$  indicates that the effect size differed between levels of the subgroup.

CI=confidence interval; %E=percent total energy intake; IHCL=intrahepatocellular lipid; MD=mean difference; N=number; SMD=standardized mean difference.

**Supplementary Figure S51: Risk of bias (using The Cochrane Collaboration Tool) subgroup analysis for the effect of important food sources of fructose-containing sugars and IHCL (SMD) in addition trials**

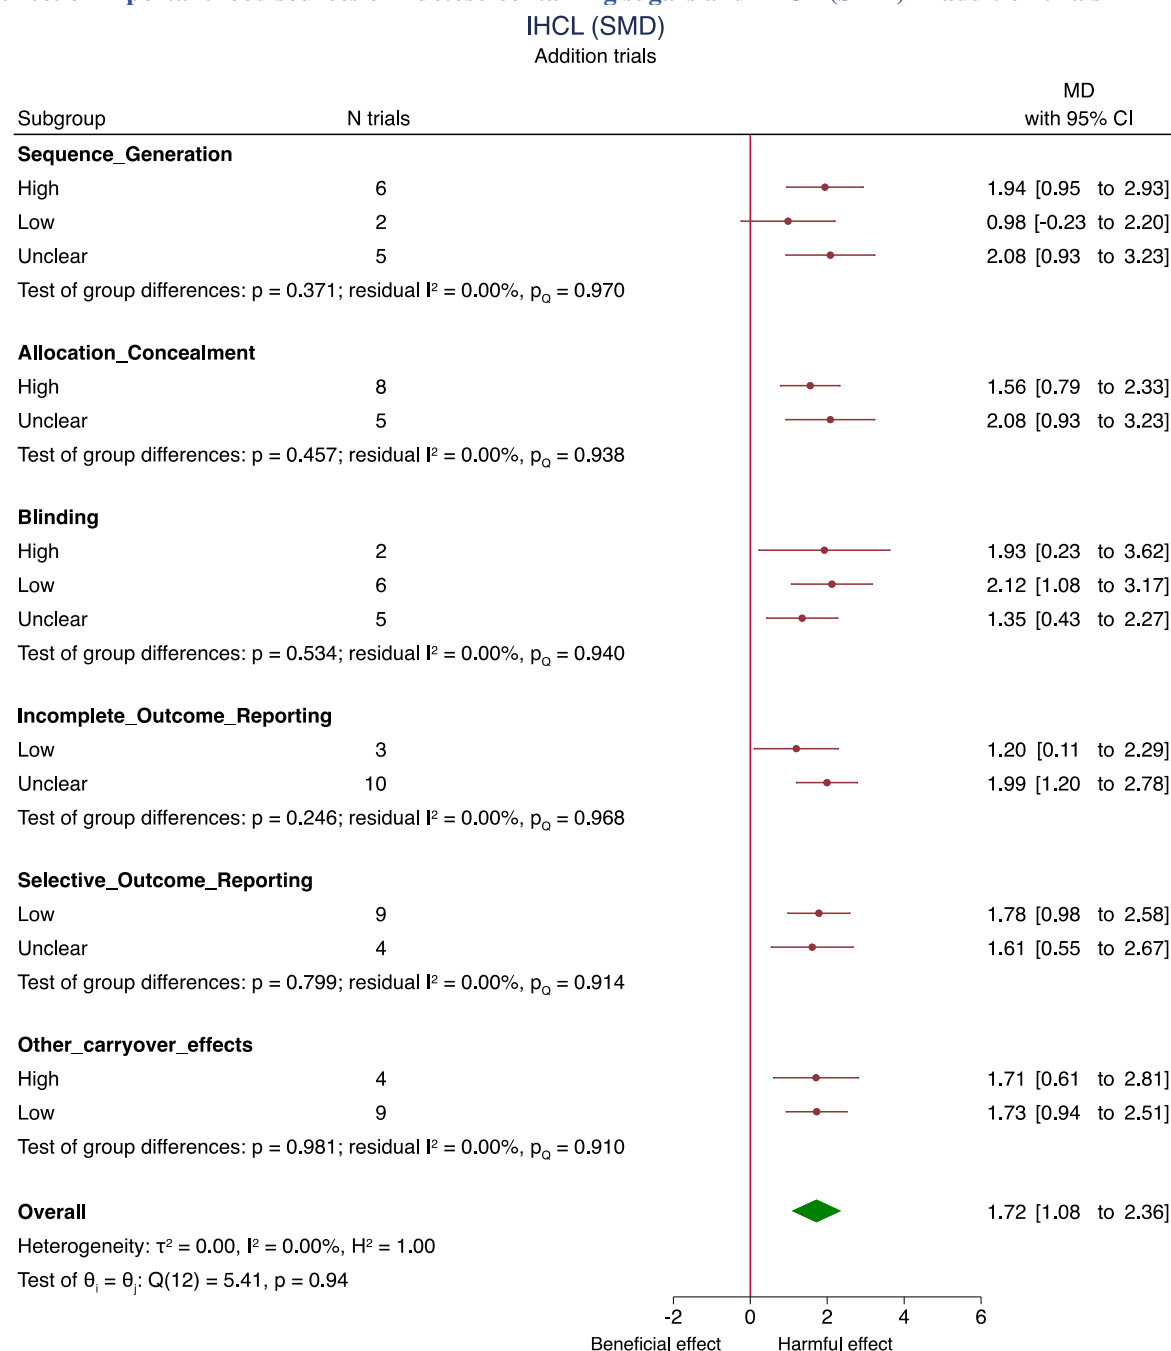

Test of  $\theta = 0$ :  $z = 5.272$ ,  $p = 0.000$

The green diamond represents the pooled estimate for the overall primary analysis of food sources of fructose-containing sugars and fasting serum uric acid levels. Within subgroup mean differences are the pooled effect estimates represented by a red circle. 95% confidence intervals are represented by the line through the circle. Data are expressed as mean differences with 95% confidence intervals using the generic inverse-variance method and random effects DerSimonian-Laird model. Inter-study heterogeneity was assessed using the Cochrane Q statistic and quantified using the  $I^2$  statistic, with significance set at  $p < 0.100$  and  $I^2 \geq 50\%$  considered to be evidence of substantial heterogeneity.  $p < 0.050$  indicates that the effect size differed between levels of the subgroup. CI=confidence interval; IHCL=intrahepatocellular lipid; MD=mean difference; N=number; SMD=standardized mean difference.

# **Supplementary Figure S52 (part 1 of 3): Subgroup analyses for the effect of important food sources of fructose-containing sugars and ALT (U/L) in substitution trials**

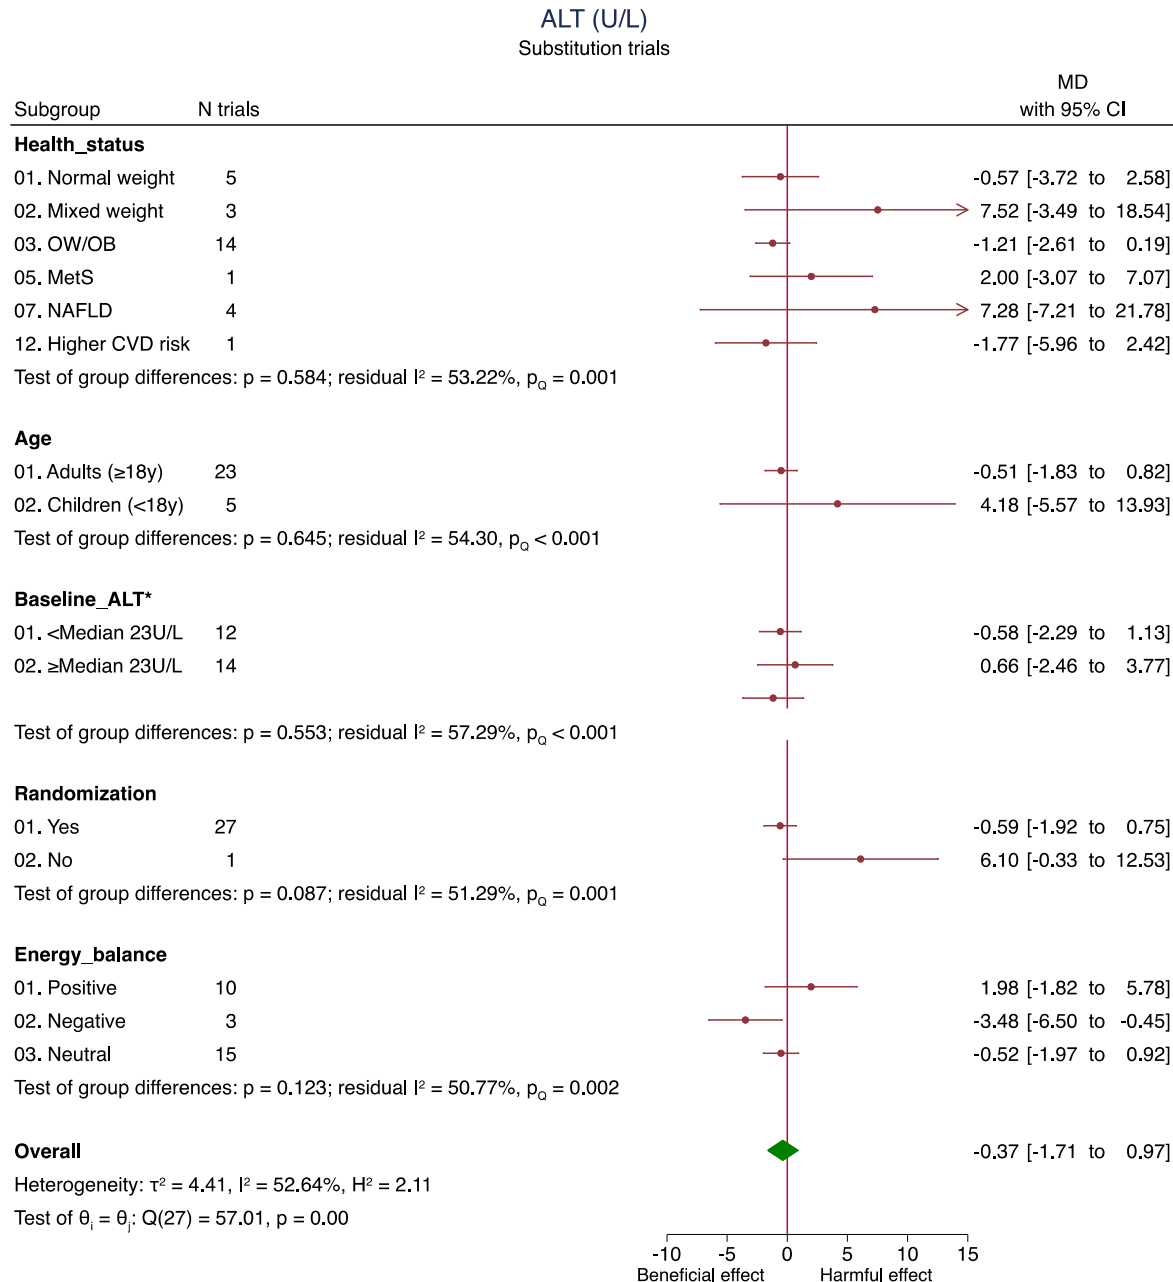

Test of  $\theta = 0$ :  $z = -0.541$ ,  $p = 0.589$

The green diamond represents the pooled estimate for the overall primary analysis of food sources of fructose-containing sugars and ALT. Within subgroup mean differences are the pooled effect estimates represented by a red circle. 95% confidence intervals are represented by the line through the circle. Data are expressed as mean differences with 95% confidence intervals using the generic inverse-variance method and random effects DerSimonian-Laird model. Inter-study heterogeneity was assessed using the Cochrane Q statistic and quantified using the  $I^2$  statistic, with significance set at  $p < 0.100$  and  $I^2 \geq 50\%$  considered to be evidence of substantial heterogeneity.  $p < 0.050$  indicates that the effect size differed between levels of the subgroup.

\*N=2 trials missing data for baseline ALT.

ALT=alanine aminotransferase; AST=aspartate aminotransferase; CI=confidence interval; CVD=cardiovascular disease; MD=mean difference; MetS=metabolic syndrome; N=number; NAFLD=non-alcoholic fatty liver disease; OW/OB=overweight or obese; y=years.

**Supplementary Figure S52 (part 2 of 3): Subgroup analyses for the effect of important food sources of fructose-containing sugars and ALT (U/L) in substitution trials**

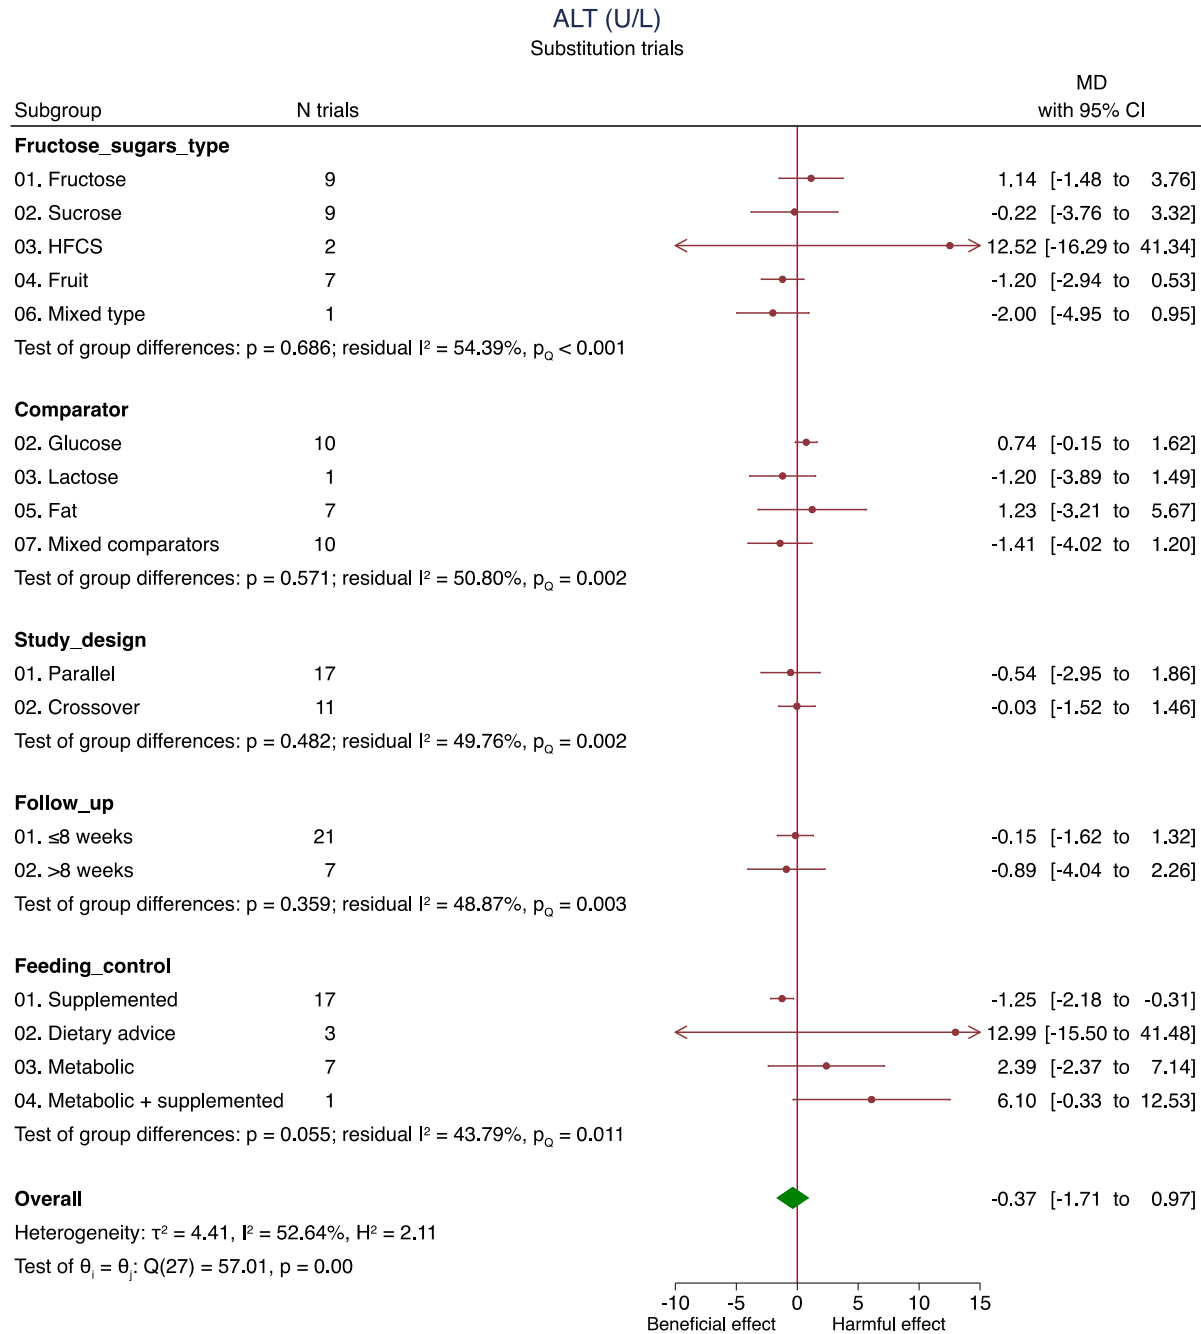

Test of  $\theta = 0$ :  $z = -0.541$ ,  $p = 0.589$

The green diamond represents the pooled estimate for the overall primary analysis of food sources of fructose-containing sugars and ALT. Within subgroup mean differences are the pooled effect estimates represented by a red circle. 95% confidence intervals are represented by the line through the circle. Data are expressed as mean differences with 95% confidence intervals using the generic inverse-variance method and random effects DerSimonian-Laird model. Inter-study heterogeneity was assessed using the Cochrane Q statistic and quantified using the  $I^2$  statistic, with significance set at  $p < 0.100$  and  $I^2 \geq 50\%$  considered to be evidence of substantial heterogeneity.  $p < 0.050$  indicates that the effect size differed between levels of the subgroup.

ALT=alanine aminotransferase; CI=confidence interval; HFCS=high fructose corn syrup; MD=mean difference; N=number; y=years.

**Supplementary Figure S52 (part 3 of 3): A priori subgroup analyses for the effect of important food sources of fructose-containing sugars and ALT (U/L) in substitution trials**

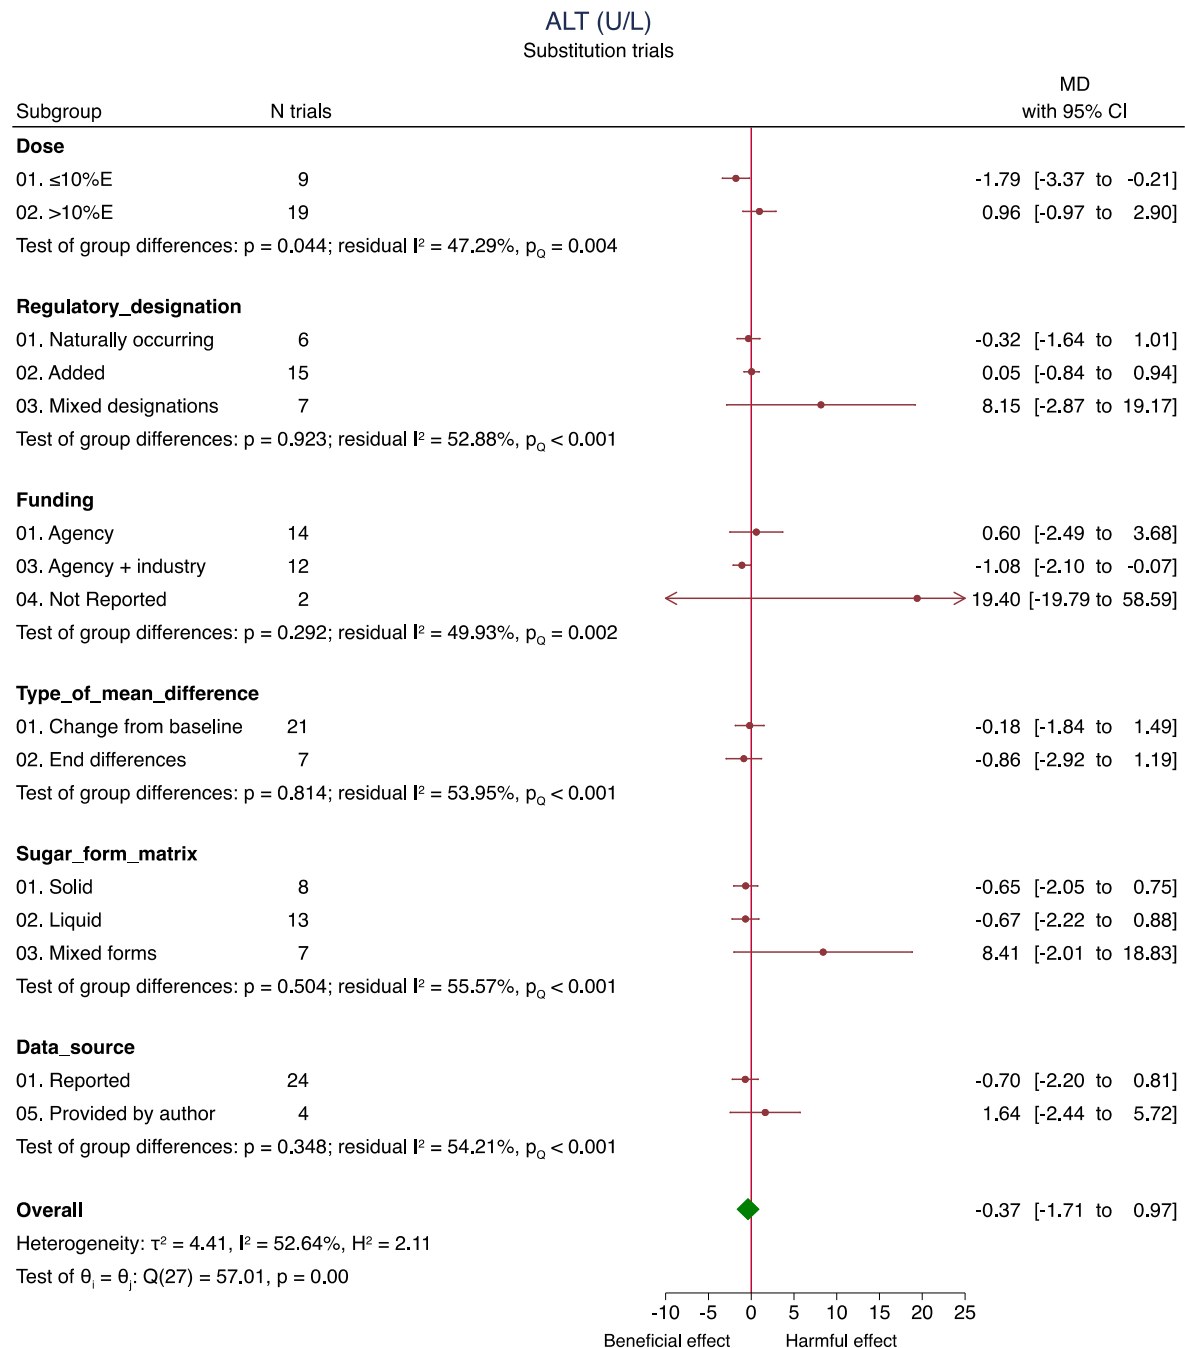

Test of  $\theta = 0$ :  $z = -0.541$ ,  $p = 0.589$

The green diamond represents the pooled estimate for the overall primary analysis of food sources of fructose-containing sugars and ALT. Within subgroup mean differences are the pooled effect estimates represented by a red circle. 95% confidence intervals are represented by the line through the circle. Data are expressed as mean differences with 95% confidence intervals using the generic inverse-variance method and random effects DerSimonian-Laird model. Inter-study heterogeneity was assessed using the Cochrane Q statistic and quantified using the  $I^2$  statistic, with significance set at  $p < 0.100$  and  $I^2 \geq 50\%$  considered to be evidence of substantial heterogeneity.  $p < 0.050$  indicates that the effect size differed between levels of the subgroup.

ALT=alanine aminotransferase; CI=confidence interval; %E= percentage of total energy intake; MD=mean difference; N=number.

**Supplementary Figure S53: Risk of bias (using The Cochrane Collaboration Tool) subgroup analysis for the effect of important food sources of fructose-containing sugars and ALT (U/L) in substitution trials**

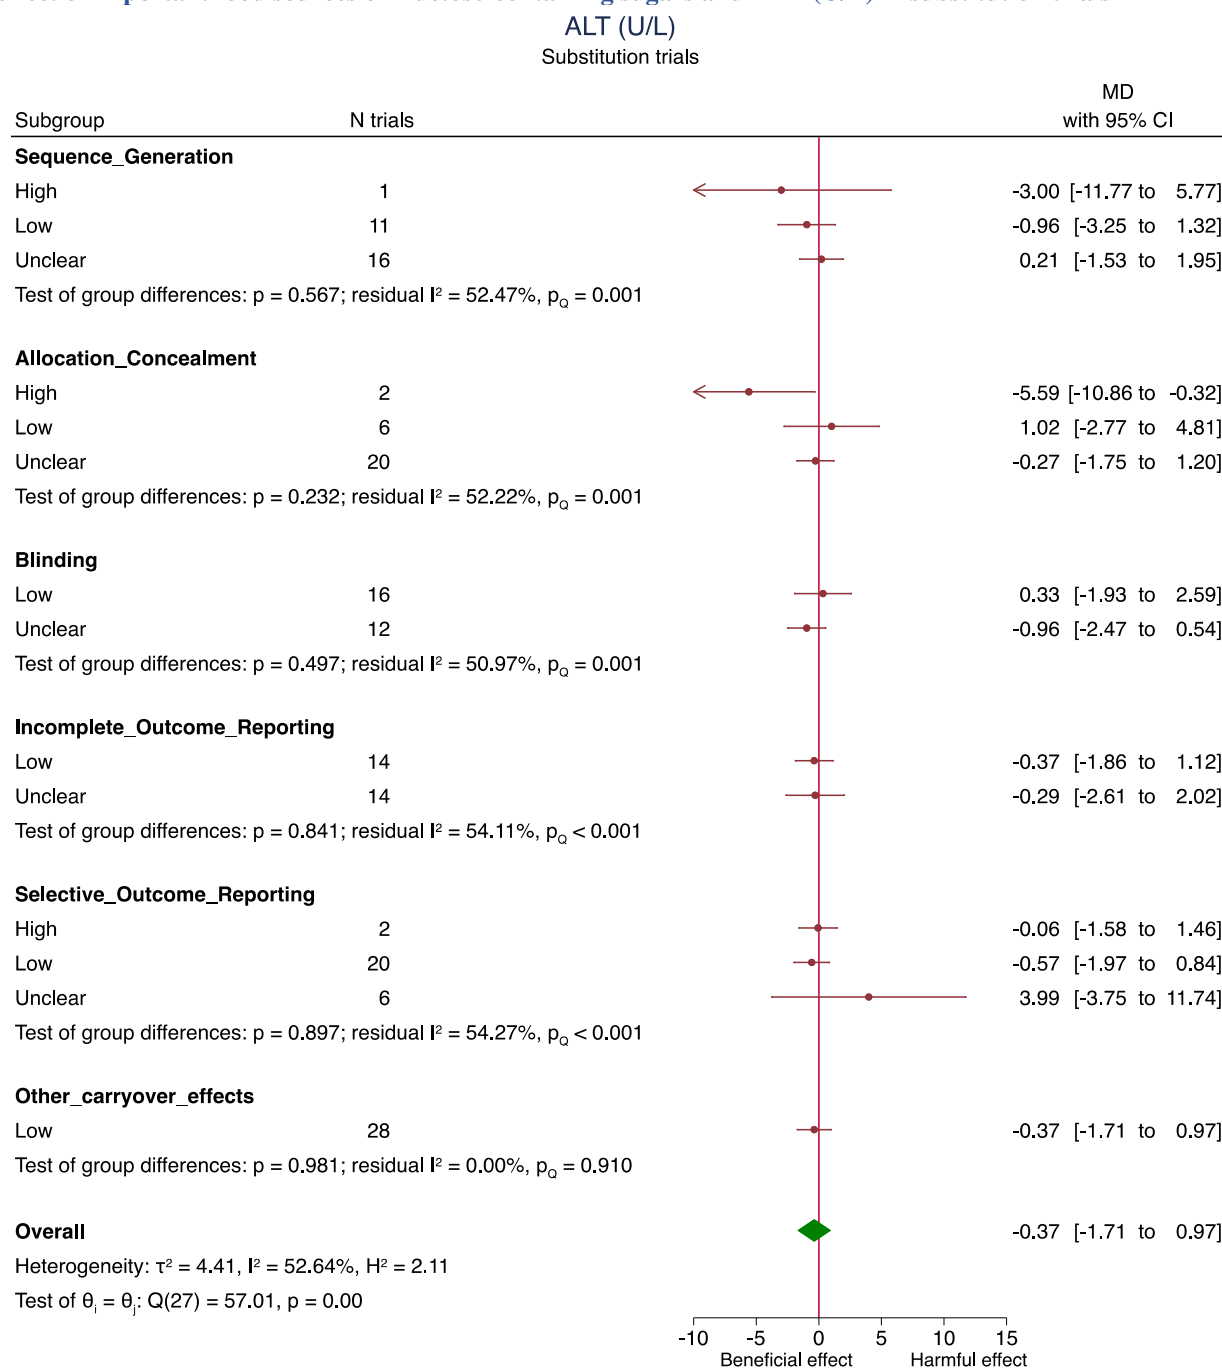

Test of  $\theta = 0$ :  $z = -0.541$ ,  $p = 0.589$

The green diamond represents the pooled estimate for the overall primary analysis of food sources of fructose-containing sugars and ALT. Within subgroup mean differences are the pooled effect estimates represented by a red circle. 95% confidence intervals are represented by the line through the circle. Data are expressed as mean differences with 95% confidence intervals using the generic inverse-variance method and random effects DerSimonian-Laird model. Inter-study heterogeneity was assessed using the Cochrane Q statistic and quantified using the  $I^2$  statistic, with significance set at  $p < 0.100$  and  $I^2 \geq 50\%$  considered to be evidence of substantial heterogeneity.  $p < 0.050$  indicates that the effect size differed between levels of the subgroup. ALT=alanine aminotransferase; CI=confidence interval; MD=mean difference; N=number.

**Supplementary Figure S54 (part 1 of 3): A priori subgroup analyses for the effect of important food sources of fructose-containing sugars and ALT (U/L) in addition trials**

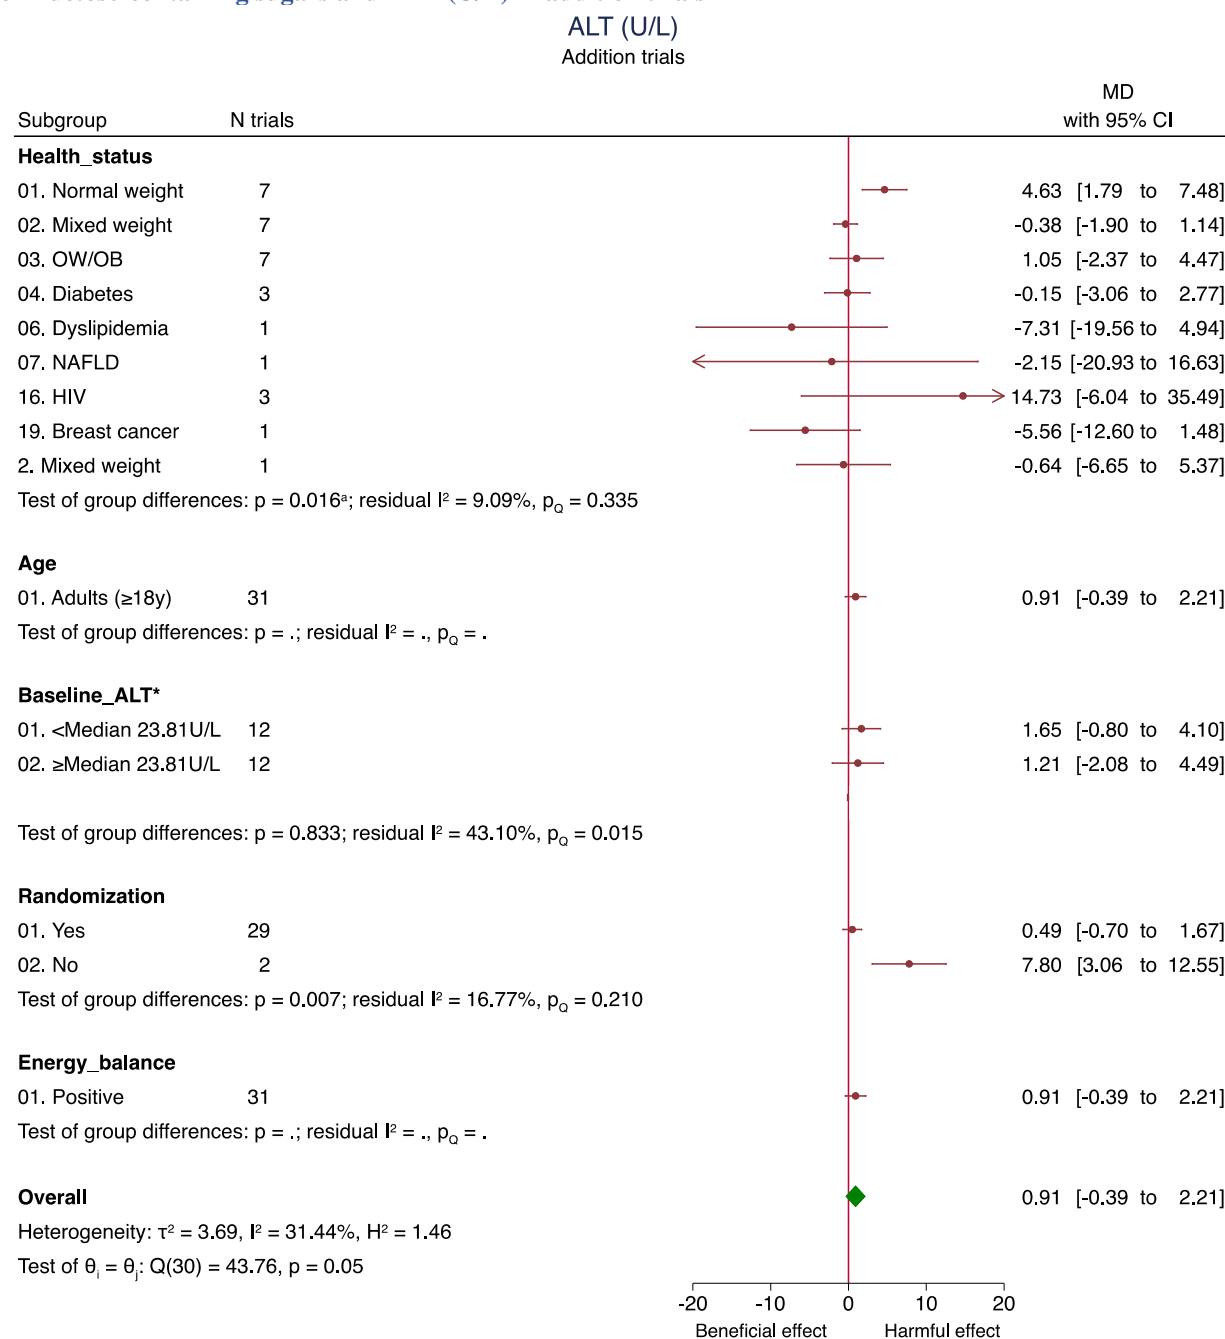

Test of  $\theta = 0$ :  $z = 1.349$ ,  $p = 0.177$

The green diamond represents the pooled estimate for the overall primary analysis of food sources of fructose-containing sugars and ALT. Within subgroup mean differences are the pooled effect estimates represented by a red circle. 95% confidence intervals are represented by the line through the circle. Data are expressed as mean differences with 95% confidence intervals using the generic inverse-variance method and random effects DerSimonian-Laird model. Inter-study heterogeneity was assessed using the Cochrane Q statistic and quantified using the  $I^2$  statistic, with significance set at  $p < 0.100$  and  $I^2 \geq 50\%$  considered to be evidence of substantial heterogeneity.  $p < 0.050$  indicates that the effect size differed between levels of the subgroup.

\*N=7 trials missing data for baseline ALT.

<sup>a</sup>Pairwise between-subgroup mean differences (95% CIs) for Health status were as follows: **(2 vs 1)** -4.92U/L (-7.96, -1.88U/L); (3 vs 1) -3.21U/L (-6.54, 0.12U/L); **(4 vs 1)** -4.72U/L (-8.86, -0.585U/L); (6 vs 1) -11.8U/L (-24.5, 0.79U/L); (7 vs 1) -6.69U/L (-25.7, 12.3U/L); (16 vs 1) 10.2U/L (-10.8, 31.2U/L); **(19 vs 1)** -10.1U/L (-17.8, -2.4U/L); (3 vs 2) 1.71U/L (-0.958, 4.38U/L); (4 vs 2) 0.195U/L (-3.43, 3.82U/L); (6 vs 2) -6.93U/L (-19.4, 5.55U/L); (7 vs 2) -1.77U/L (-20.7, 17.2U/L); (16 vs 2) 15.1U/L (-5.74, 36U/L); (19 vs 2) -5.18U/L (-12.6, 2.25U/L); (4 vs 3) -1.51U/L (-5.39, 2.36U/L); (6 vs 3) -8.64U/L (-21.2, 3.91U/L); (7 vs 3) -3.48U/L (-22.5, 15.5U/L); (16 vs 3) 13.4U/L (-7.5, 34.3U/L); (19 vs 3) -6.89U/L (-14.4, 0.668U/L); (6 vs 4) -7.12U/L (-19.9, 5.67U/L); (7 vs 4) -1.96U/L (-21.1, 17.2U/L); (16 vs 4) 14.9U/L (-6.13, 36U/L); (19 vs 4) -5.37U/L (-13.3, 2.57U/L); (7 vs 6) 5.16U/L (-17.4, 27.7U/L); (16 vs 6) 22U/L (-2.15, 46.2U/L); (19 vs 6) 1.75U/L (-12.6, 16.1U/L); (16 vs 7) 16.9U/L (-11.2, 45U/L); (19 vs 7) -3.41U/L (-23.6, 16.8U/L); (19 vs 16) -20.3U/L (-42.3, 1.73U/L).  
ALT=alanine aminotransferase; CI=confidence interval; HIV=human immunodeficiency virus; MD=mean difference; N=number; NAFLD=non-alcoholic fatty liver disease; OW/OB=overweight or obese; y=years.



**Supplementary Figure S54 (part 2 of 3): A priori subgroup analyses for the effect of important food sources of fructose-containing sugars and ALT (U/L) in addition trials**

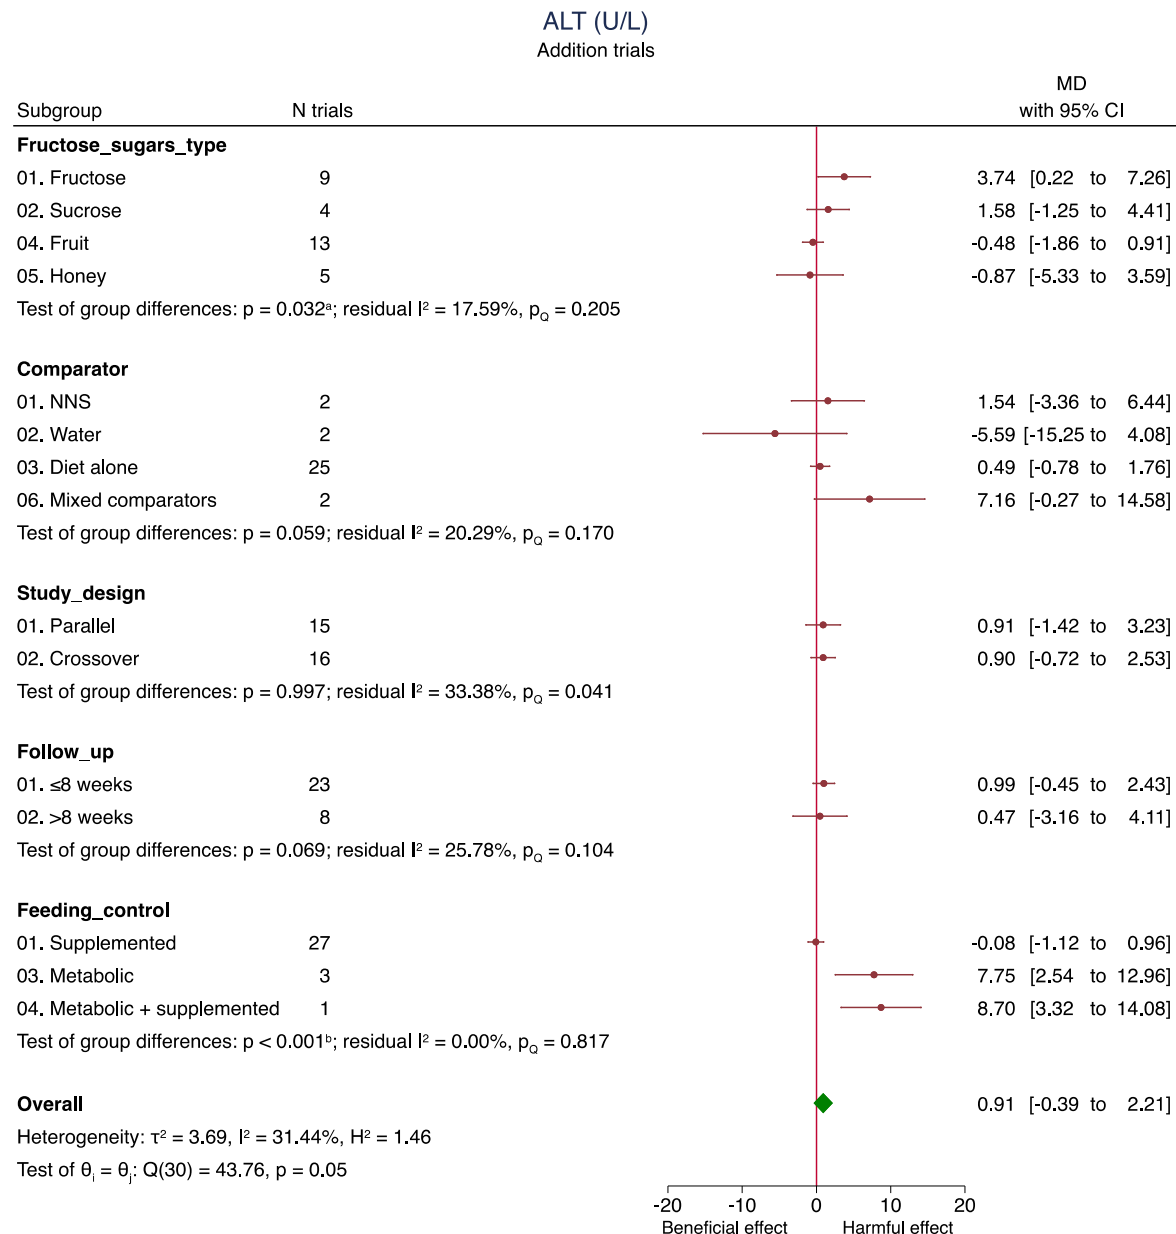

Test of  $\theta = 0$ :  $z = 1.349$ ,  $p = 0.177$

The green diamond represents the pooled estimate for the overall primary analysis of food sources of fructose-containing sugars and ALT. Within subgroup mean differences are the pooled effect estimates represented by a red circle. 95% confidence intervals are represented by the line through the circle. Data are expressed as mean differences with 95% confidence intervals using the generic inverse-variance method and random effects DerSimonian-Laird model. Inter-study heterogeneity was assessed using the Cochrane Q statistic and quantified using the  $I^2$  statistic, with significance set at  $p < 0.100$  and  $I^2 \geq 50\%$  considered to be evidence of substantial heterogeneity.  $p < 0.050$  indicates that the effect size differed between levels of the subgroup.

<sup>a</sup>Pairwise between-subgroup mean differences (95% CIs) for fructose sugars type were as follows: (2 vs 1) -2U/L (-5.77, 1.77U/L); (4 vs 1) -4.05U/L (-6.88, -1.21U/L); (5 vs 1) -4.33U/L (-8.61, -0.042U/L); (4 vs 2) -2.05U/L (-5.48, 1.39U/L); (5 vs 2) -2.33U/L (-7.03, 2.38U/L); (5 vs 4) -0.28U/L (-4.27, 3.71U/L).

<sup>b</sup>Pairwise between-subgroup mean differences (95% CIs) for feeding control were as follows: (2 vs 1) 7.26U/L (3.44, 11.1U/L); (4 vs 1) 8.78U/L (3.3, 14.3U/L); (4 vs 3) 1.52U/L (-5, 8.04U/L).

**Supplementary Figure S54 (part 3 of 3): A priori subgroup analyses for the effect of important food sources of fructose-containing sugars and ALT (U/L) in addition trials**

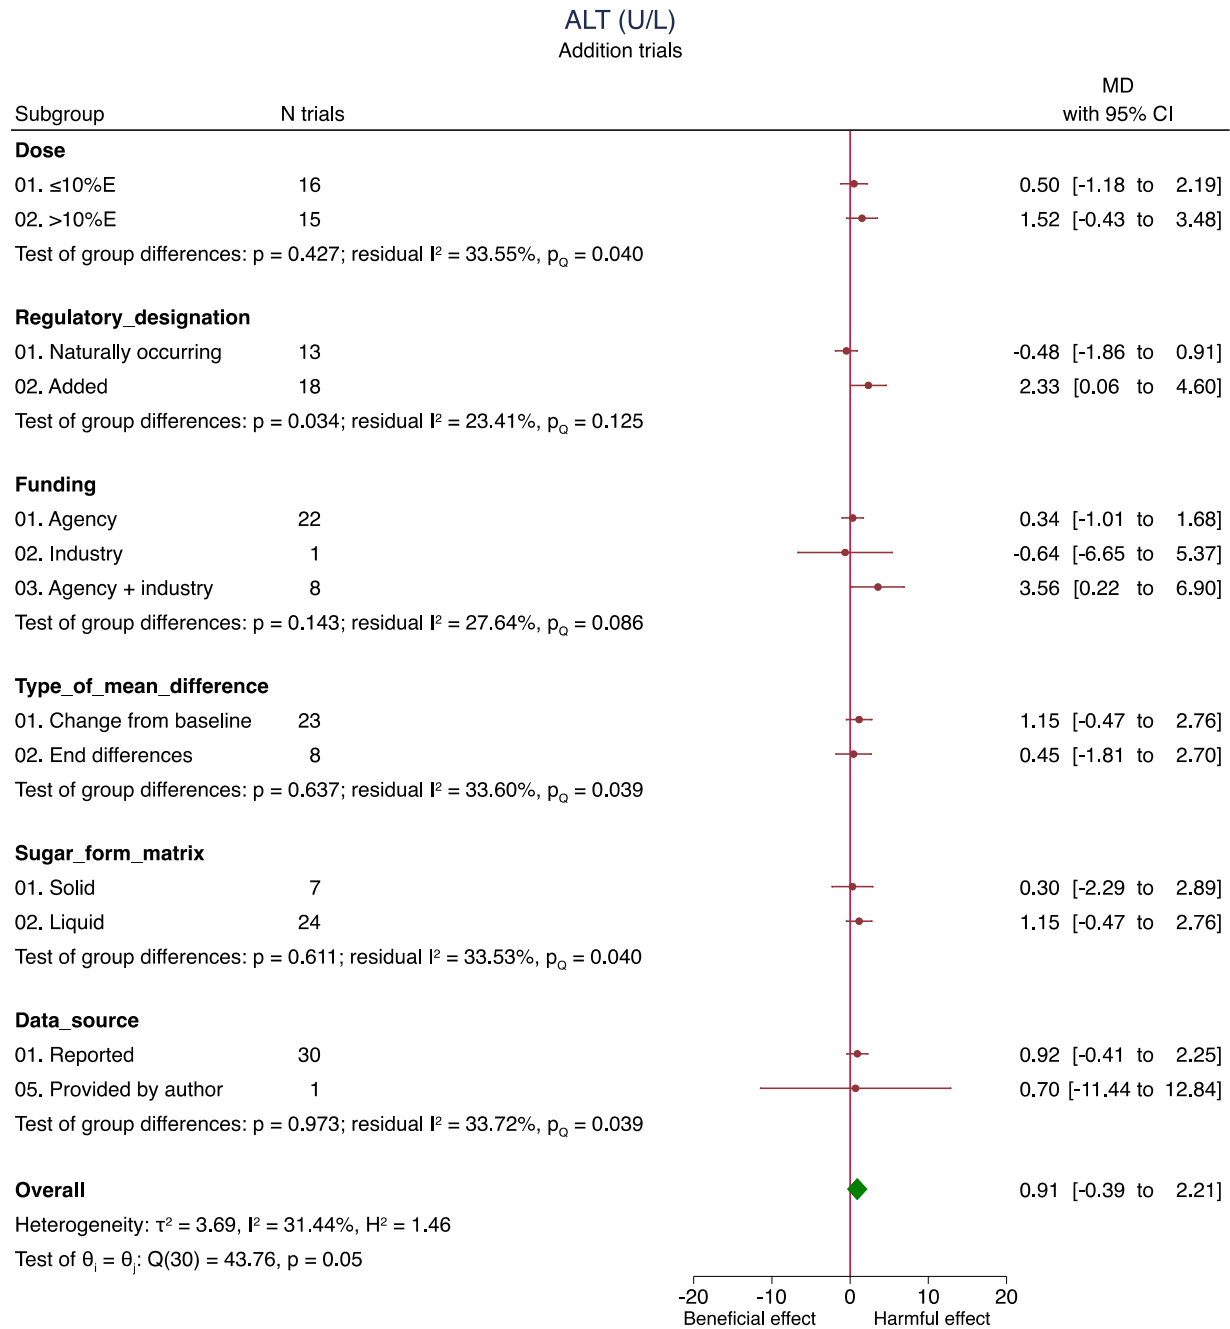

Test of  $\theta = 0$ :  $z = 1.349$ ,  $p = 0.177$

The green diamond represents the pooled estimate for the overall primary analysis of food sources of fructose-containing sugars and ALT. Within subgroup mean differences are the pooled effect estimates represented by a red circle. 95% confidence intervals are represented by the line through the circle. Data are expressed as mean differences with 95% confidence intervals using the generic inverse-variance method and random effects DerSimonian-Laird model. Inter-study heterogeneity was assessed using the Cochrane Q statistic and quantified using the  $I^2$  statistic, with significance set at  $p < 0.100$  and  $I^2 \geq 50\%$  considered to be evidence of substantial heterogeneity.  $p < 0.050$  indicates that the effect size differed between levels of the subgroup. ALT=alanine aminotransferase; CI=confidence interval; %E=percentage of total energy intake; MD=mean difference; NAFLD=non-alcoholic fatty liver disease; N=number.

**Supplementary Figure S55: Risk of bias (using The Cochrane Collaboration Tool) subgroup analysis for the effect of important food sources of fructose-containing sugars and ALT (U/L) in addition trials**

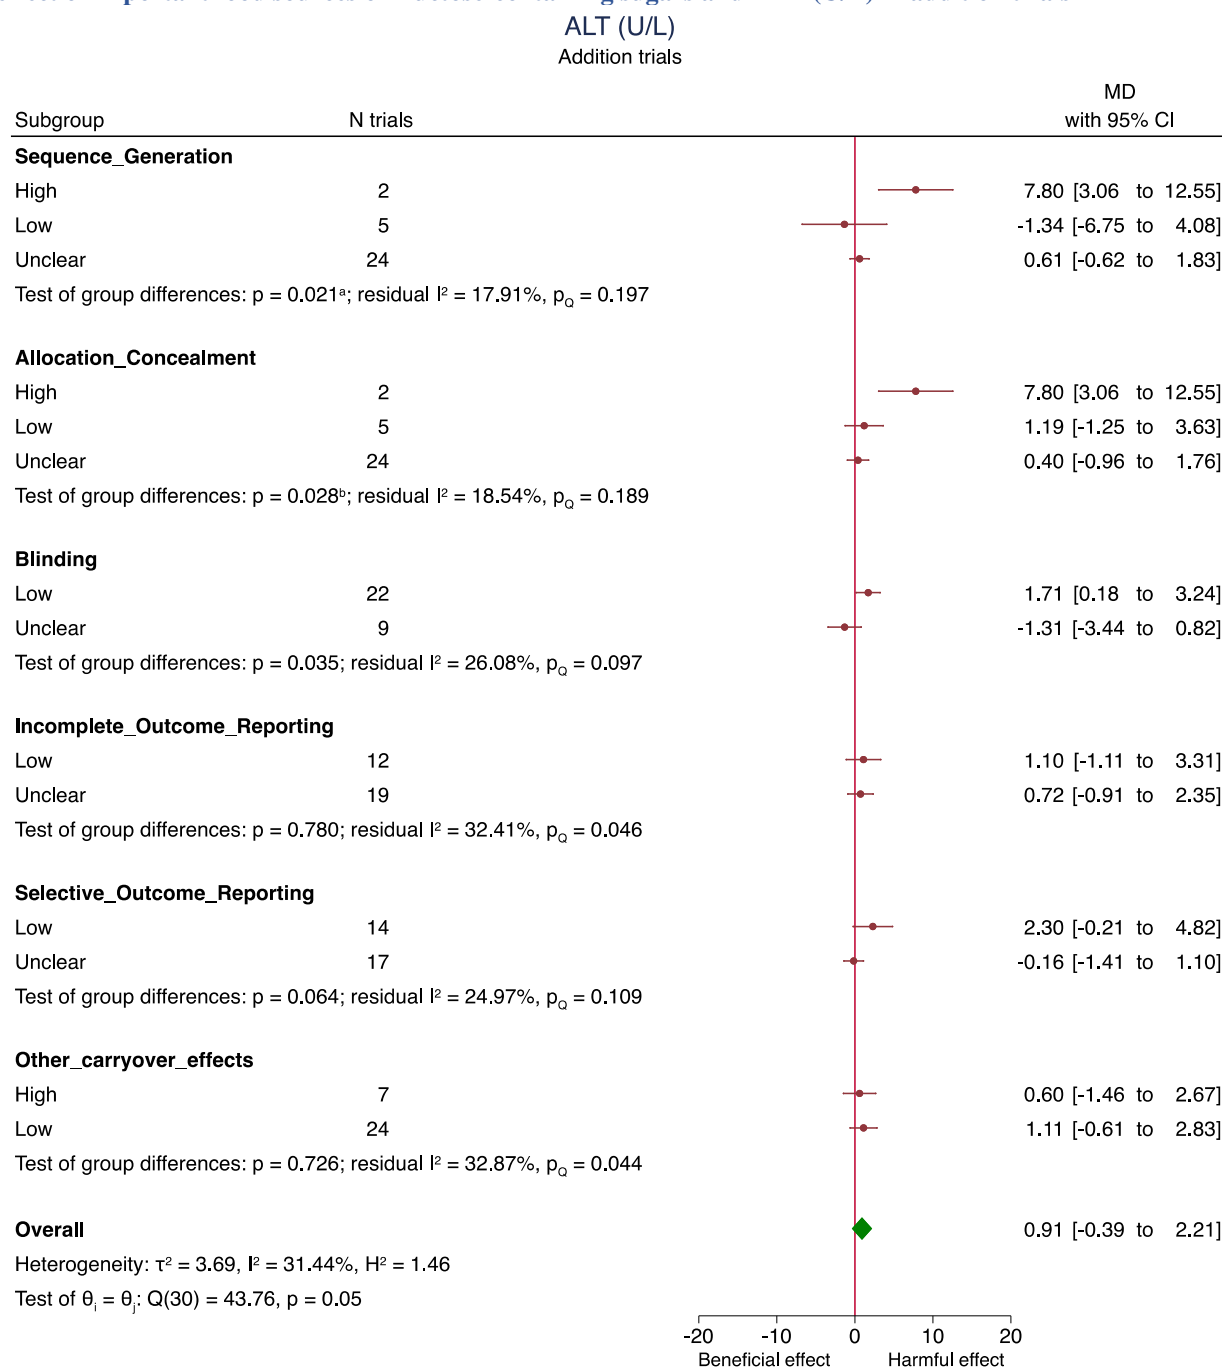

Test of  $\theta = 0$ :  $z = 1.374$ ,  $p = 0.169$

The green diamond represents the pooled estimate for the overall primary analysis of food sources of fructose-containing sugars and ALT. Within subgroup mean differences are the pooled effect estimates represented by a red circle. 95% confidence intervals are represented by the line through the circle. Data are expressed as mean differences with 95% confidence intervals using the generic inverse-variance method and random effects DerSimonian-Laird model. Inter-study heterogeneity was assessed using the Cochrane Q statistic and quantified using the  $I^2$  statistic, with significance set at  $p < 0.100$  and  $I^2 \geq 50\%$  considered to be evidence of substantial heterogeneity.  $p < 0.050$  indicates that the effect size differed between levels of the subgroup.

<sup>a</sup> Pairwise between-subgroup mean differences (95% CIs) for sequence generation were as follows: (**Low vs High**) -9.18U/L (-16.3, -2.01U/L); (**Unclear vs High**) -7.1U/L (-12.4, -1.78U/L); (Unclear vs Low) 2.09U/L (-3.02, 7.19U/L).

<sup>b</sup> Pairwise between-subgroup mean differences (95% CIs) for allocation concealment were as follows: (**Low vs High**) -6.63U/L (-12.6, -0.665U/L); (**Unclear vs Low**) -7.32U/L (-12.7, -1.94U/L); (Unclear vs Low) -0.682U/L (-3.88, 2.51U/L).

ALT=alanine aminotransferase; CI=confidence interval; N/A=undeterminable; N=number.

**Supplementary Figure S56 (part 1 of 3): A priori subgroup analyses for the effect of SSB on ALT (U/L) in addition trials**

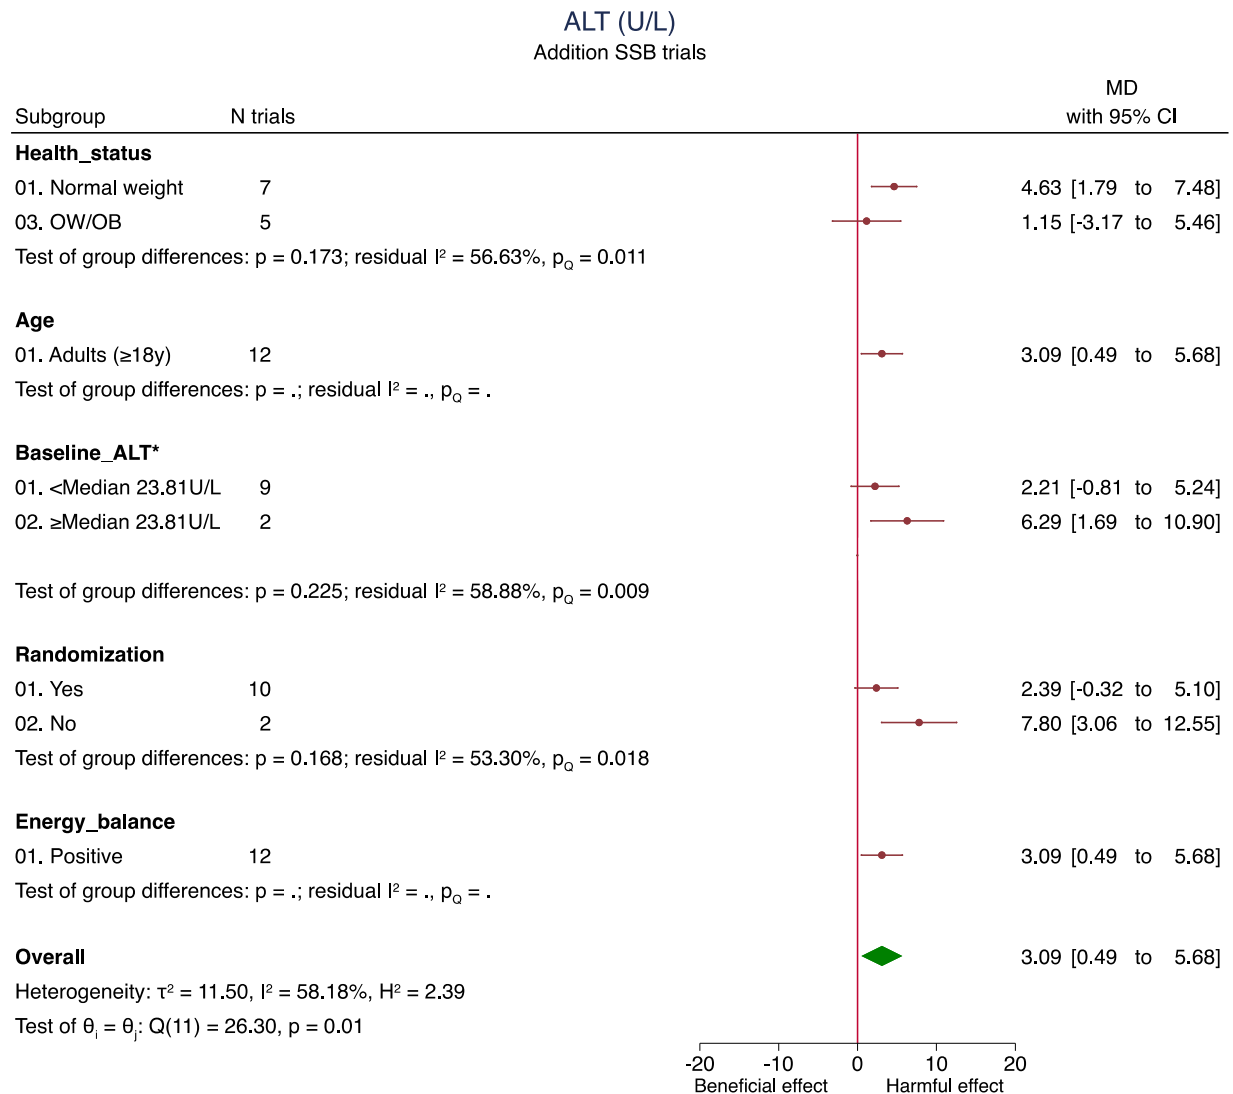

Test of  $\theta = 0$ :  $z = 2.331$ ,  $p = 0.020$

The green diamond represents the pooled estimate for the overall primary analysis of food sources of fructose-containing sugars and ALT. Within subgroup mean differences are the pooled effect estimates represented by a red circle. 95% confidence intervals are represented by the line through the circle. Data are expressed as mean differences with 95% confidence intervals using the generic inverse-variance method and random effects DerSimonian-Laird model. Inter-study heterogeneity was assessed using the Cochrane Q statistic and quantified using the  $I^2$  statistic, with significance set at  $p < 0.100$  and  $I^2 \geq 50\%$  considered to be evidence of substantial heterogeneity.  $p < 0.050$  indicates that the effect size differed between levels of the subgroup.

\*N=1 trial missing data for baseline ALT.

ALT=alanine aminotransferase; CI=confidence interval; MD=mean difference; N=number; NAFLD=non-alcoholic fatty liver disease; OW/OB=overweight or obese; y=years.

**Supplementary Figure S56 (part 2 of 3): A priori subgroup analyses for the effect of SSB on ALT (U/L) in addition trials**

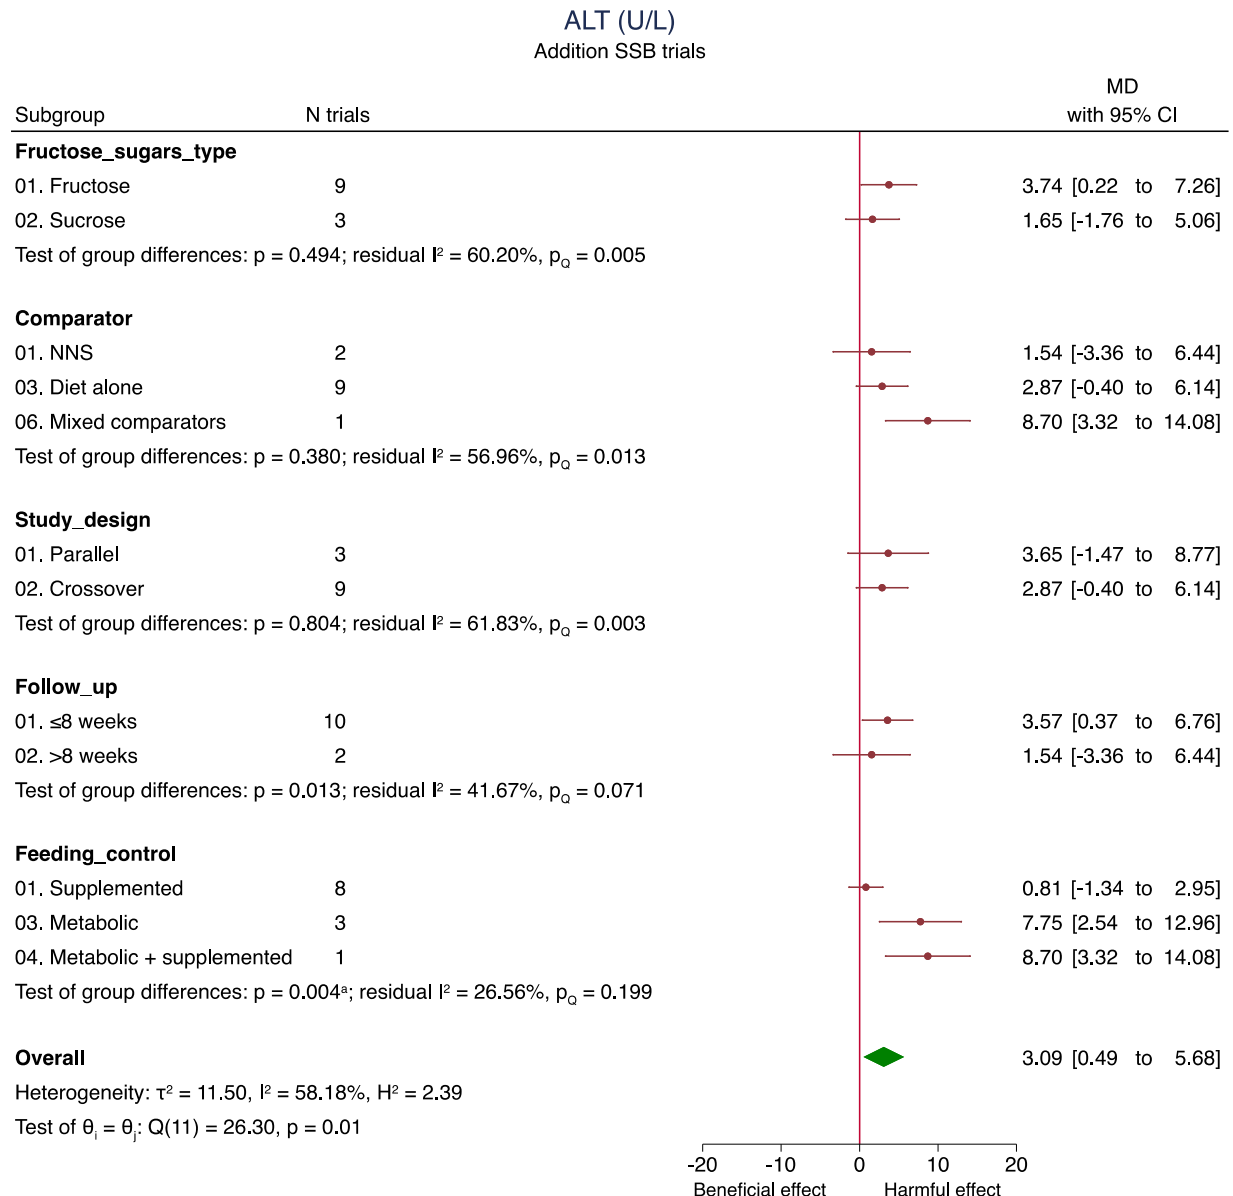

Test of  $\theta = 0$ :  $z = 2.331$ ,  $p = 0.020$

The green diamond represents the pooled estimate for the overall primary analysis of food sources of fructose-containing sugars and ALT. Within subgroup mean differences are the pooled effect estimates represented by a red circle. 95% confidence intervals are represented by the line through the circle. Data are expressed as mean differences with 95% confidence intervals using the generic inverse-variance method and random effects DerSimonian-Laird model. Inter-study heterogeneity was assessed using the Cochrane Q statistic and quantified using the  $I^2$  statistic, with significance set at  $p < 0.100$  and  $I^2 \geq 50\%$  considered to be evidence of substantial heterogeneity.  $p < 0.050$  indicates that the effect size differed between levels of the subgroup.

<sup>a</sup> Pairwise between-subgroup mean differences (95% CIs) for feeding control were as follows: (3 vs 1) 6.67U/L (1.85, 11.5U/L); (4 vs 1) 7.92U/L (1.14, 14.7U/L); (4 vs 3) 1.25U/L (-6.4, 8.89U/L).

**Supplementary Figure S56 (part 3 of 3): A priori subgroup analyses for the effect of SSB on ALT (U/L) in addition trials**

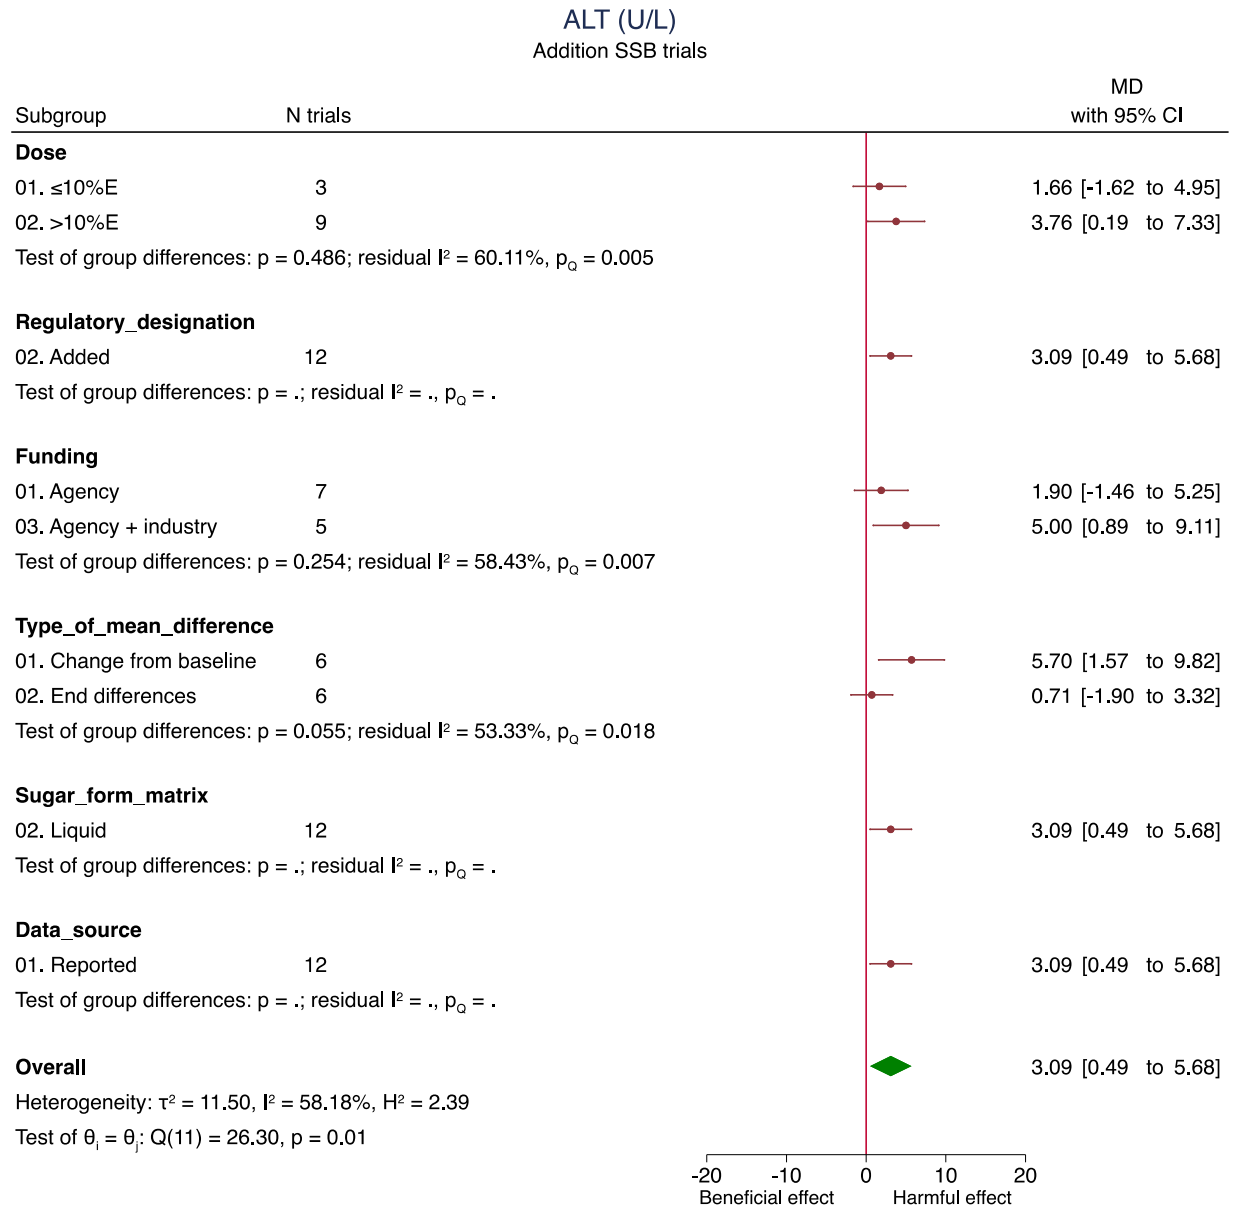

Test of  $\theta = 0$ :  $z = 2.331$ ,  $p = 0.020$

The green diamond represents the pooled estimate for the overall primary analysis of food sources of fructose-containing sugars and ALT. Within subgroup mean differences are the pooled effect estimates represented by a red circle. 95% confidence intervals are represented by the line through the circle. Data are expressed as mean differences with 95% confidence intervals using the generic inverse-variance method and random effects DerSimonian-Laird model. Inter-study heterogeneity was assessed using the Cochrane Q statistic and quantified using the  $I^2$  statistic, with significance set at  $p < 0.100$  and  $I^2 \geq 50\%$  considered to be evidence of substantial heterogeneity.  $p < 0.050$  indicates that the effect size differed between levels of the subgroup. ALT=alanine aminotransferase; CI=confidence interval; %E=percentage of total energy intake; MD=mean difference; N=number; NAFLD=non-alcoholic fatty liver disease.

**Supplementary Figure S57: Risk of bias (using The Cochrane Collaboration Tool) subgroup analysis for the effect of SSB on ALT (U/L) in addition trials**

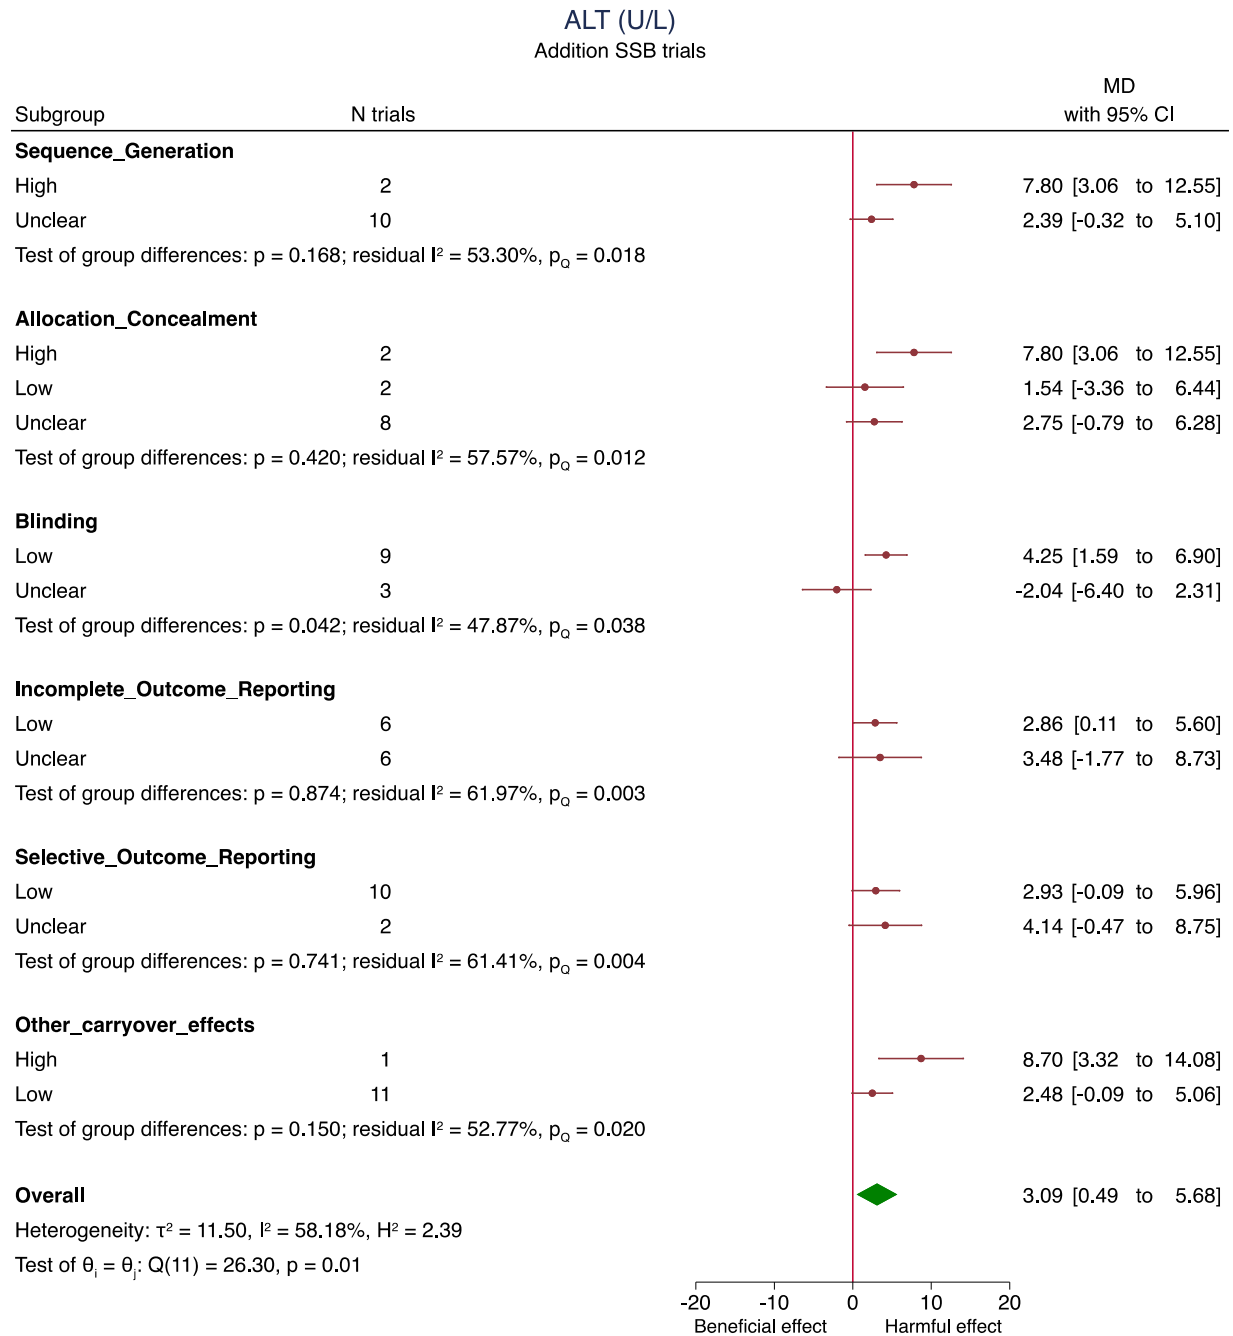

Test of  $\theta = 0$ :  $z = 2.331$ ,  $p = 0.020$

The green diamond represents the pooled estimate for the overall primary analysis of food sources of fructose-containing sugars and ALT. Within subgroup mean differences are the pooled effect estimates represented by a red circle. 95% confidence intervals are represented by the line through the circle. Data are expressed as mean differences with 95% confidence intervals using the generic inverse-variance method and random effects DerSimonian-Laird model. Inter-study heterogeneity was assessed using the Cochrane Q statistic and quantified using the  $I^2$  statistic, with significance set at  $p < 0.100$  and  $I^2 \geq 50\%$  considered to be evidence of substantial heterogeneity.  $p < 0.050$  indicates that the effect size differed between levels of the subgroup. ALT=alanine aminotransferase; CI=confidence interval; N/A=undeterminable; N=number.



**Supplementary Figure S58 (part 1 of 3): A priori subgroup analyses for the effect of important food sources of fructose-containing sugars and AST (U/L) in substitution trials**

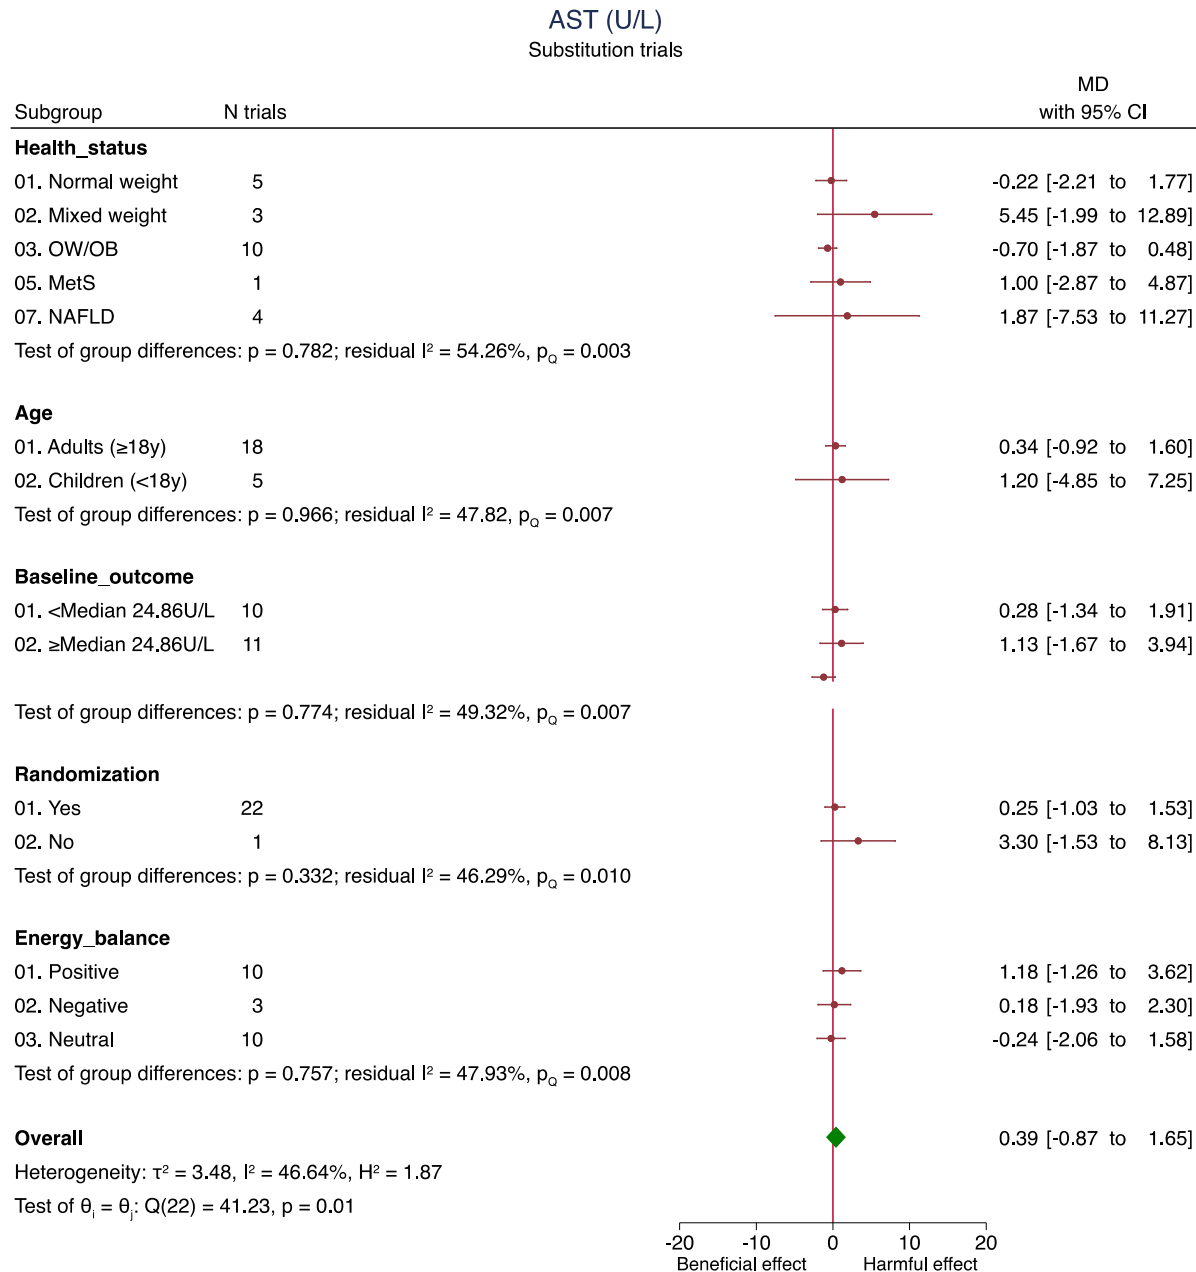

Test of  $\theta = 0$ :  $z = -1.086$ ,  $p = 0.277$

The green diamond represents the pooled estimate for the overall primary analysis of food sources of fructose-containing sugars and AST. Within subgroup mean differences are the pooled effect estimates represented by a red circle. 95% confidence intervals are represented by the line through the circle. Data are expressed as mean differences with 95% confidence intervals using the generic inverse-variance method and random effects DerSimonian-Laird model. Inter-study heterogeneity was assessed using the Cochrane Q statistic and quantified using the  $I^2$  statistic, with significance set at  $p < 0.100$  and  $I^2 \geq 50\%$  considered to be evidence of substantial heterogeneity.  $p < 0.050$  indicates that the effect size differed between levels of the subgroup.

\*N=2 trials missing data for baseline AST.

ALT=alanine aminotransferase; AST=aspartate aminotransferase; CI=confidence interval; MD=mean difference; MetS=metabolic syndrome; N=number; NAFLD=non-alcoholic fatty liver disease; OW/OB=overweight or obese BMI; y=years.

**Supplementary Figure S58 (part 2 of 3): A priori subgroup analyses for the effect of important food sources of fructose-containing sugars and AST (U/L) in substitution trials**

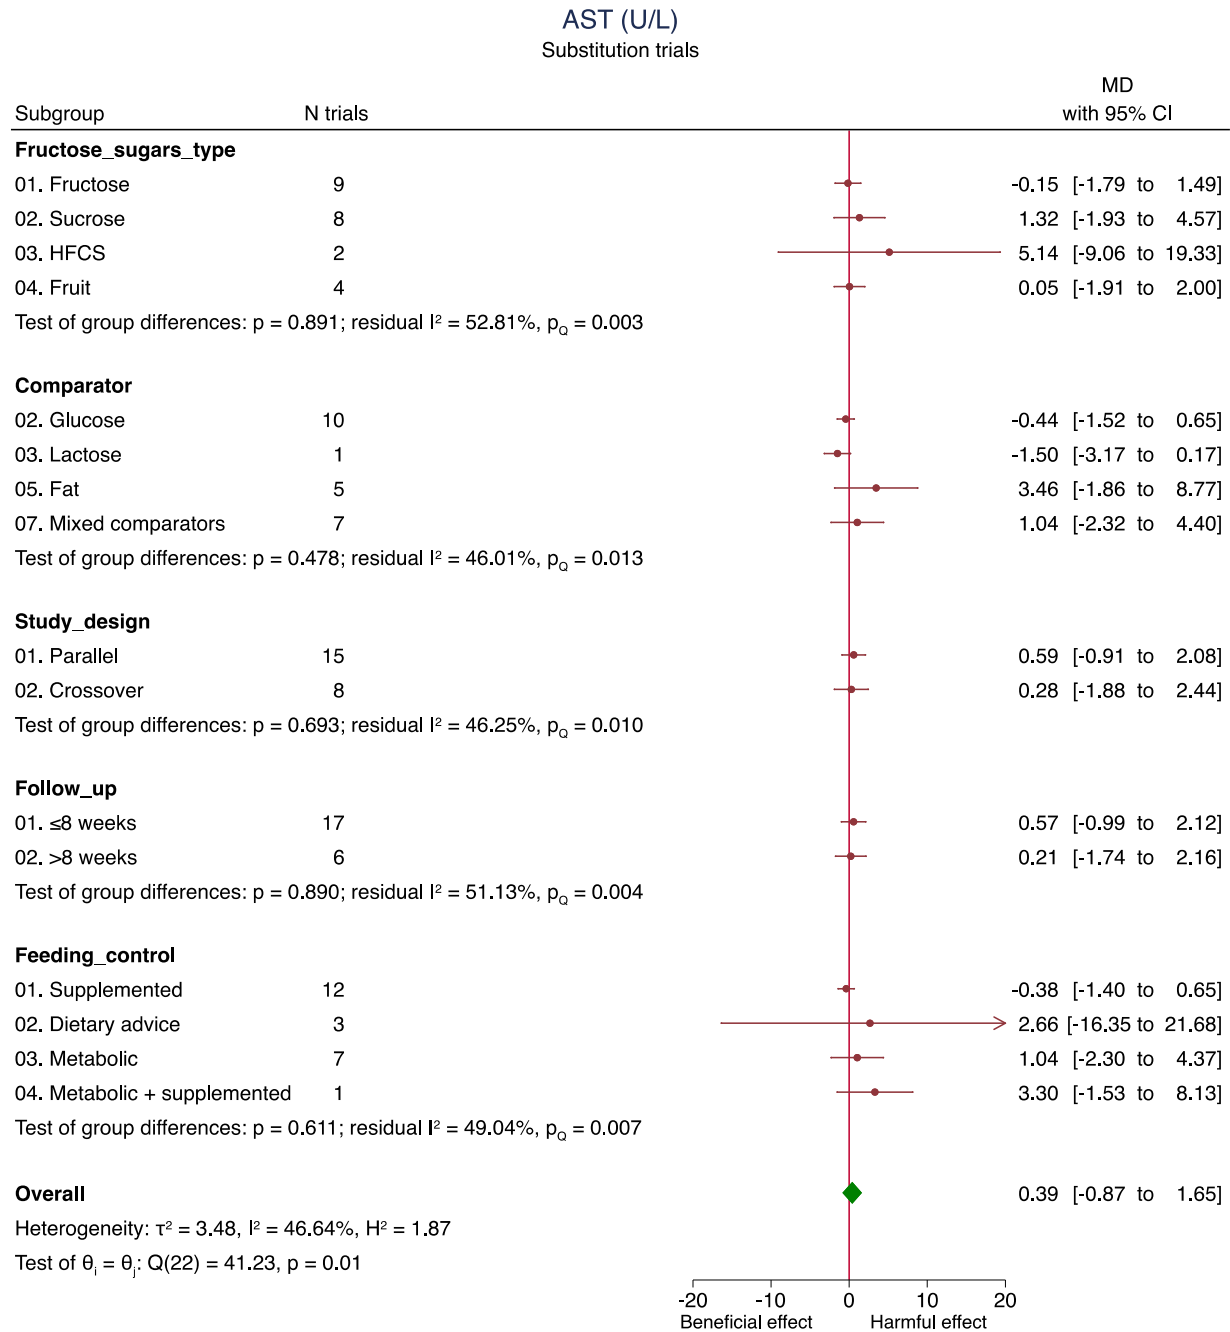

Test of  $\theta = 0$ :  $z = -1.086$ ,  $p = 0.277$

The green diamond represents the pooled estimate for the overall primary analysis of food sources of fructose-containing sugars and AST. Within subgroup mean differences are the pooled effect estimates represented by a red circle. 95% confidence intervals are represented by the line through the circle. Data are expressed as mean differences with 95% confidence intervals using the generic inverse-variance method and random effects DerSimonian-Laird model. Inter-study heterogeneity was assessed using the Cochrane Q statistic and quantified using the  $I^2$  statistic, with significance set at  $p < 0.100$  and  $I^2 \geq 50\%$  considered to be evidence of substantial heterogeneity.  $p < 0.050$  indicates that the effect size differed between levels of the subgroup.

AST=aspartate aminotransferase; CI=confidence interval; HFCS=high-fructose corn syrup; MD=mean difference; N=number.

# Supplementary Figure S58 (part 3 of 3): A priori subgroup analyses for the effect of important food sources of fructose-containing sugars and AST (U/L) in substitution trials

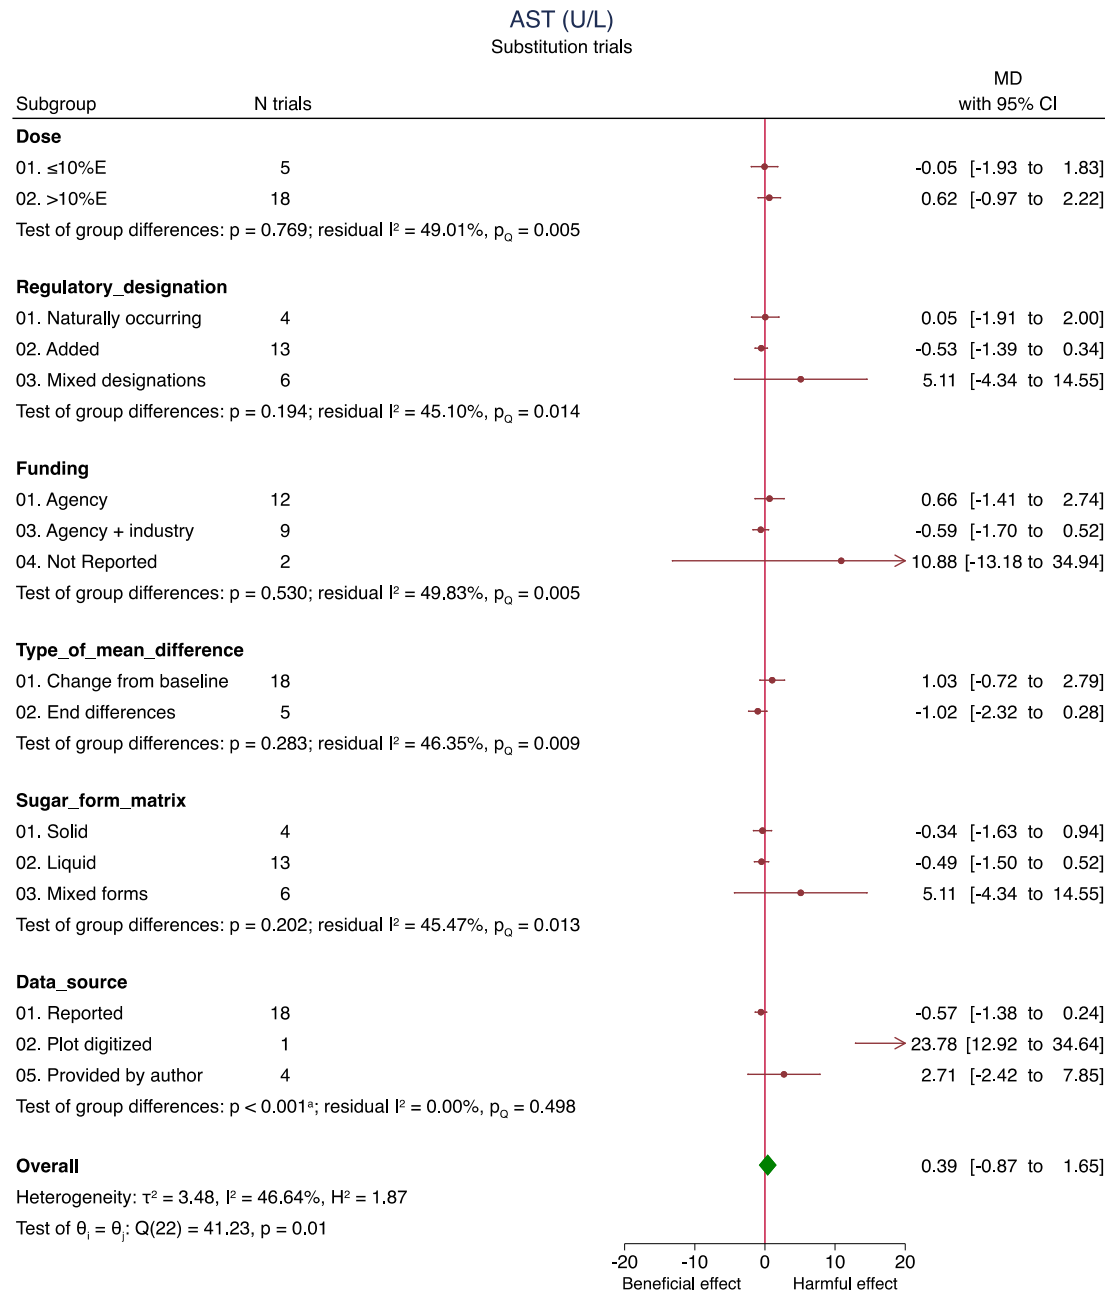

Test of  $\theta = 0$ :  $z = -1.086$ ,  $p = 0.277$

The green diamond represents the pooled estimate for the overall primary analysis of food sources of fructose-containing sugars and AST. Within subgroup mean differences are the pooled effect estimates represented by a red circle. 95% confidence intervals are represented by the line through the circle. Data are expressed as mean differences with 95% confidence intervals using the generic inverse-variance method and random effects DerSimonian-Laird model. Inter-study heterogeneity was assessed using the Cochrane Q statistic and quantified using the  $I^2$  statistic, with significance set at  $p < 0.100$  and  $I^2 \geq 50\%$  considered to be evidence of substantial heterogeneity.  $p < 0.050$  indicates that the effect size differed between levels of the subgroup.

<sup>a</sup> Pairwise between-subgroup mean differences (95% CIs) for data source were as follows: (2 vs 1) 24.4U/L (13.5, 35.2U/L); (5 vs 1) 2.57U/L (-0.359, 5.5U/L); (5 vs 2) -21.8U/L (-33, -10.6U/L).

AST=aspartate aminotransferase; CI=confidence interval; %E=percentage of total energy; MD=mean difference; N=number.

**Supplementary Figure S59: Risk of bias (using The Cochrane Collaboration Tool) subgroup analysis for the effect of important food sources of fructose-containing sugars and AST (U/L) in substitution trials**

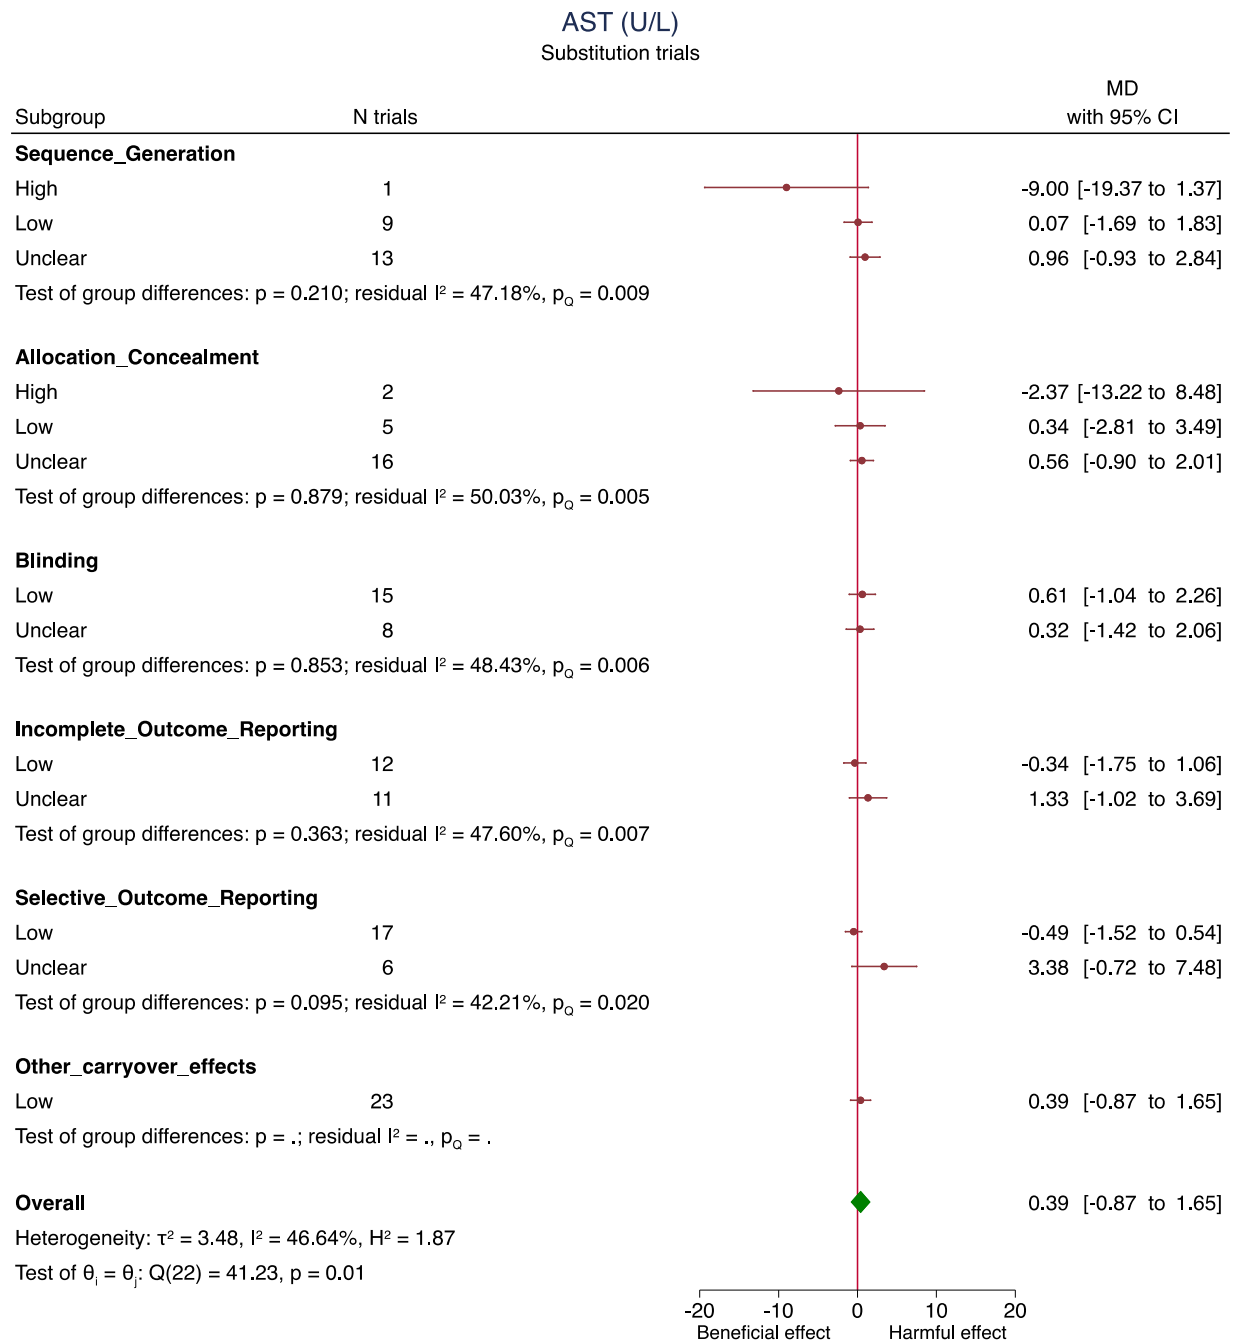

Test of  $\theta = 0$ :  $z = 0.604$ ,  $p = 0.546$

The green diamond represents the pooled estimate for the overall primary analysis of food sources of fructose-containing sugars and AST. Within subgroup mean differences are the pooled effect estimates represented by a red circle. 95% confidence intervals are represented by the line through the circle. Data are expressed as mean differences with 95% confidence intervals using the generic inverse-variance method and random effects DerSimonian-Laird model. Inter-study heterogeneity was assessed using the Cochrane Q statistic and quantified using the  $I^2$  statistic, with significance set at  $p < 0.100$  and  $I^2 \geq 50\%$  considered to be evidence of substantial heterogeneity.  $p < 0.050$  indicates that the effect size differed between levels of the subgroup. AST=aspartate aminotransferase; CI=confidence interval; MD=mean difference; N=number.

**Supplementary Figure S60 (part 1 of 3): A priori subgroup analyses for the effect of important food sources of fructose-containing sugars and AST (U/L) in addition trials**

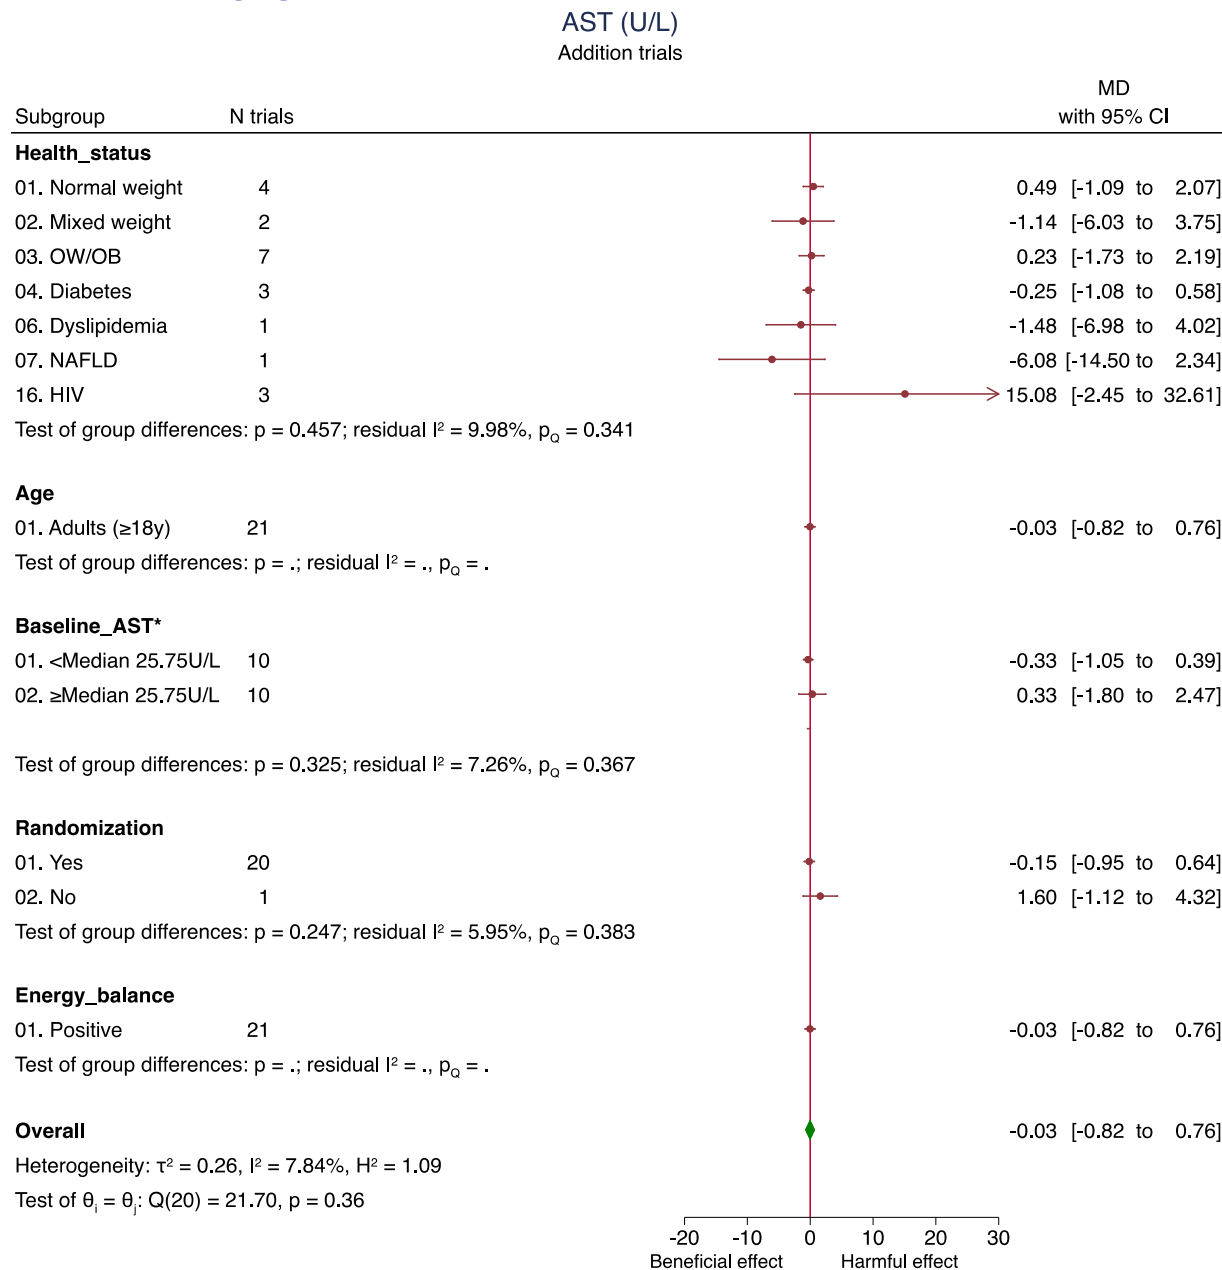

Test of  $\theta = 0$ :  $z = .$ ,  $p = .$

The green diamond represents the pooled estimate for the overall primary analysis of food sources of fructose-containing sugars and AST. Within subgroup mean differences are the pooled effect estimates represented by a red circle. 95% confidence intervals are represented by the line through the circle. Data are expressed as mean differences with 95% confidence intervals using the generic inverse-variance method and random effects DerSimonian-Laird model. Inter-study heterogeneity was assessed using the Cochrane Q statistic and quantified using the  $I^2$  statistic, with significance set at  $p < 0.100$  and  $I^2 \geq 50\%$  considered to be evidence of substantial heterogeneity.  $p < 0.050$  indicates that the effect size differed between levels of the subgroup.

\*N=1 trial missing data for baseline AST.

AST=aspartate aminotransferase; CI=confidence interval; HIV=human immunodeficiency virus; MD=mean difference; N=number; NAFLD=non-alcoholic fatty liver disease; OW/OB=overweight or obese; y=years; y=years.

**Supplementary Figure S60 (part 2 of 3): A priori subgroup analyses for the effect of important food sources of fructose-containing sugars and AST (U/L) in addition trials**

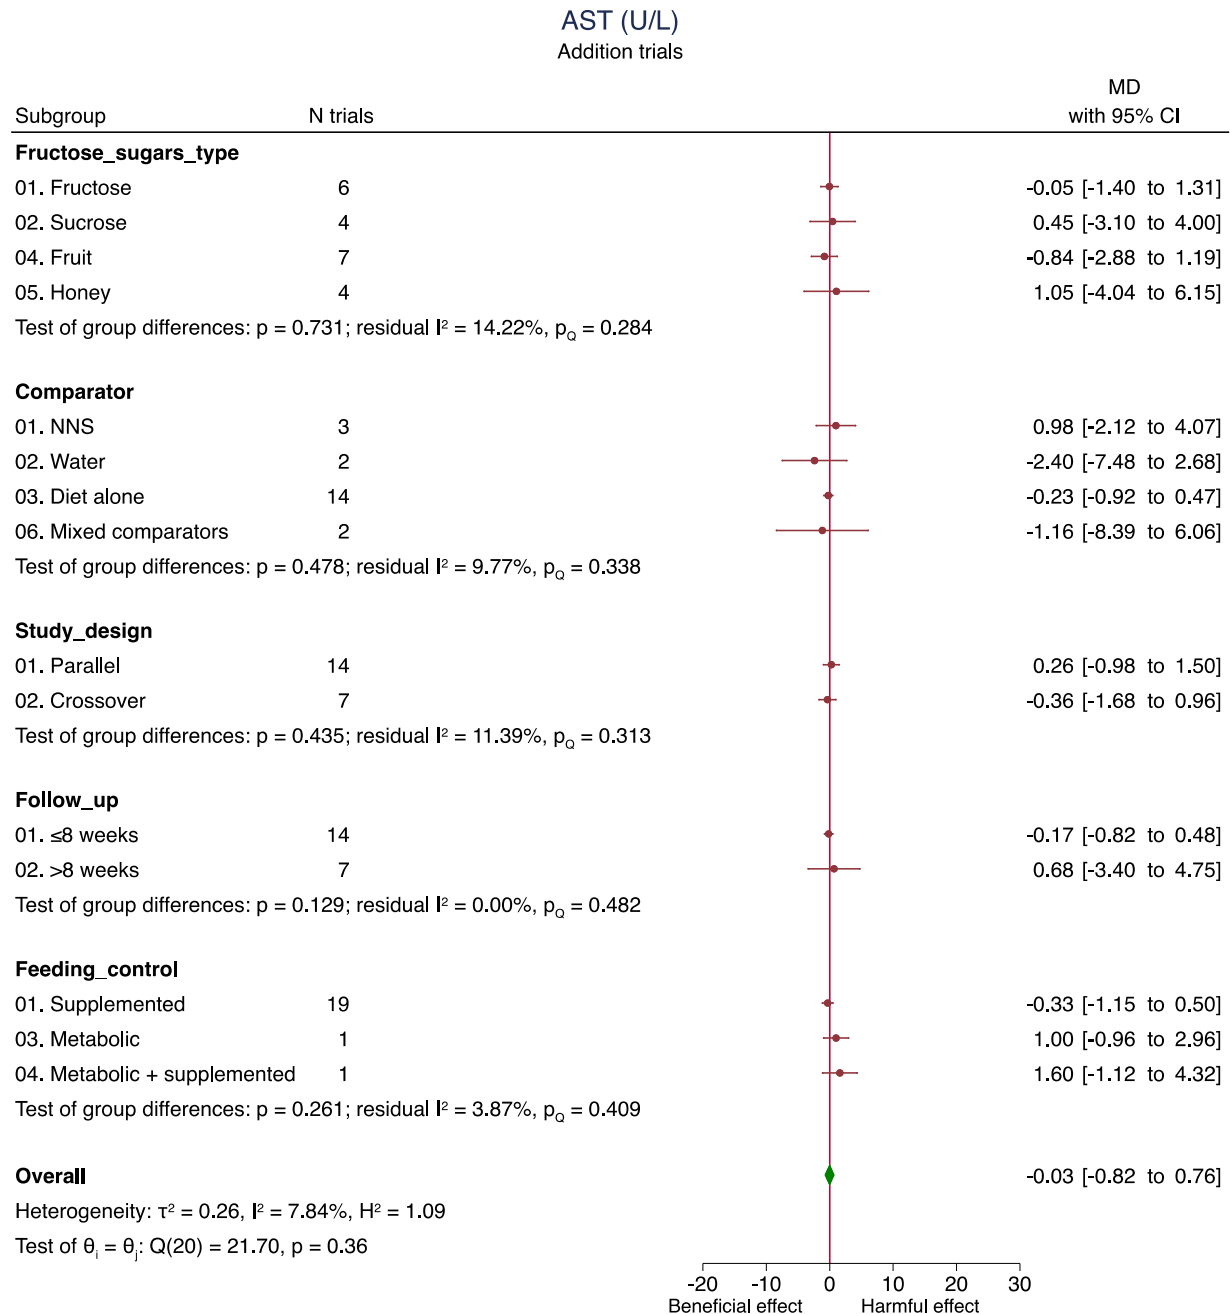

Test of  $\theta = 0$ :  $z =$ ,  $p =$

The green diamond represents the pooled estimate for the overall primary analysis of food sources of fructose-containing sugars and AST. Within subgroup mean differences are the pooled effect estimates represented by a red circle. 95% confidence intervals are represented by the line through the circle. Data are expressed as mean differences with 95% confidence intervals using the generic inverse-variance method and random effects DerSimonian-Laird model. Inter-study heterogeneity was assessed using the Cochrane Q statistic and quantified using the  $I^2$  statistic, with significance set at  $p < 0.100$  and  $I^2 \geq 50\%$  considered to be evidence of substantial heterogeneity.  $p < 0.050$  indicates that the effect size differed between levels of the subgroup.

AST=aspartate aminotransferase; CI=confidence interval; MD=mean difference; NNS=non-nutritive sweetener; N=number.

**Supplementary Figure S60 (part 3 of 3): A priori subgroup analyses for the effect of important food sources of fructose-containing sugars and AST (U/L) in addition trials**

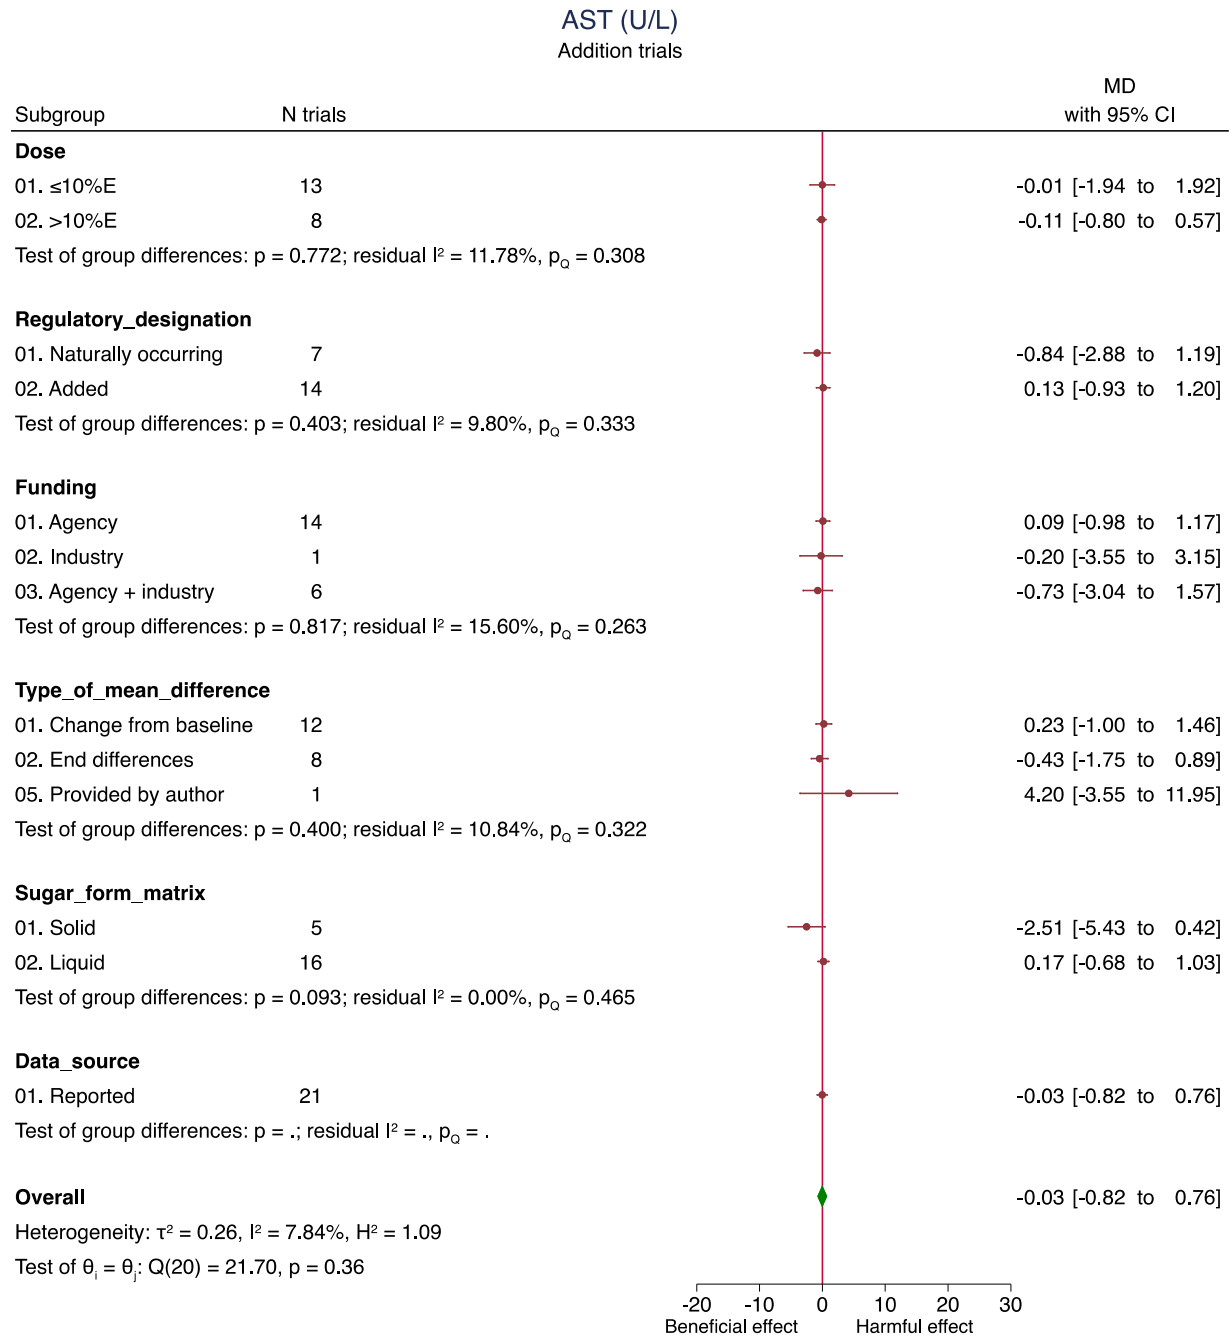

Test of  $\theta = 0$ :  $z = .$ ,  $p = .$

The green diamond represents the pooled estimate for the overall primary analysis of food sources of fructose-containing sugars and AST. Within subgroup mean differences are the pooled effect estimates represented by a red circle. 95% confidence intervals are represented by the line through the circle. Data are expressed as mean differences with 95% confidence intervals using the generic inverse-variance method and random effects DerSimonian-Laird model. Inter-study heterogeneity was assessed using the Cochrane Q statistic and quantified using the  $I^2$  statistic, with significance set at  $p < 0.100$  and  $I^2 \geq 50\%$  considered to be evidence of substantial heterogeneity.  $p < 0.050$  indicates that the effect size differed between levels of the subgroup.

AST=aspartate aminotransferase; CI=confidence interval; %E=percentage of total energy intake; MD=mean difference; N=number.

**Supplementary Figure S61: Risk of bias (using The Cochrane Collaboration Tool) subgroup analysis for the effect of important food sources of fructose-containing sugars and AST (U/L) in addition trials**

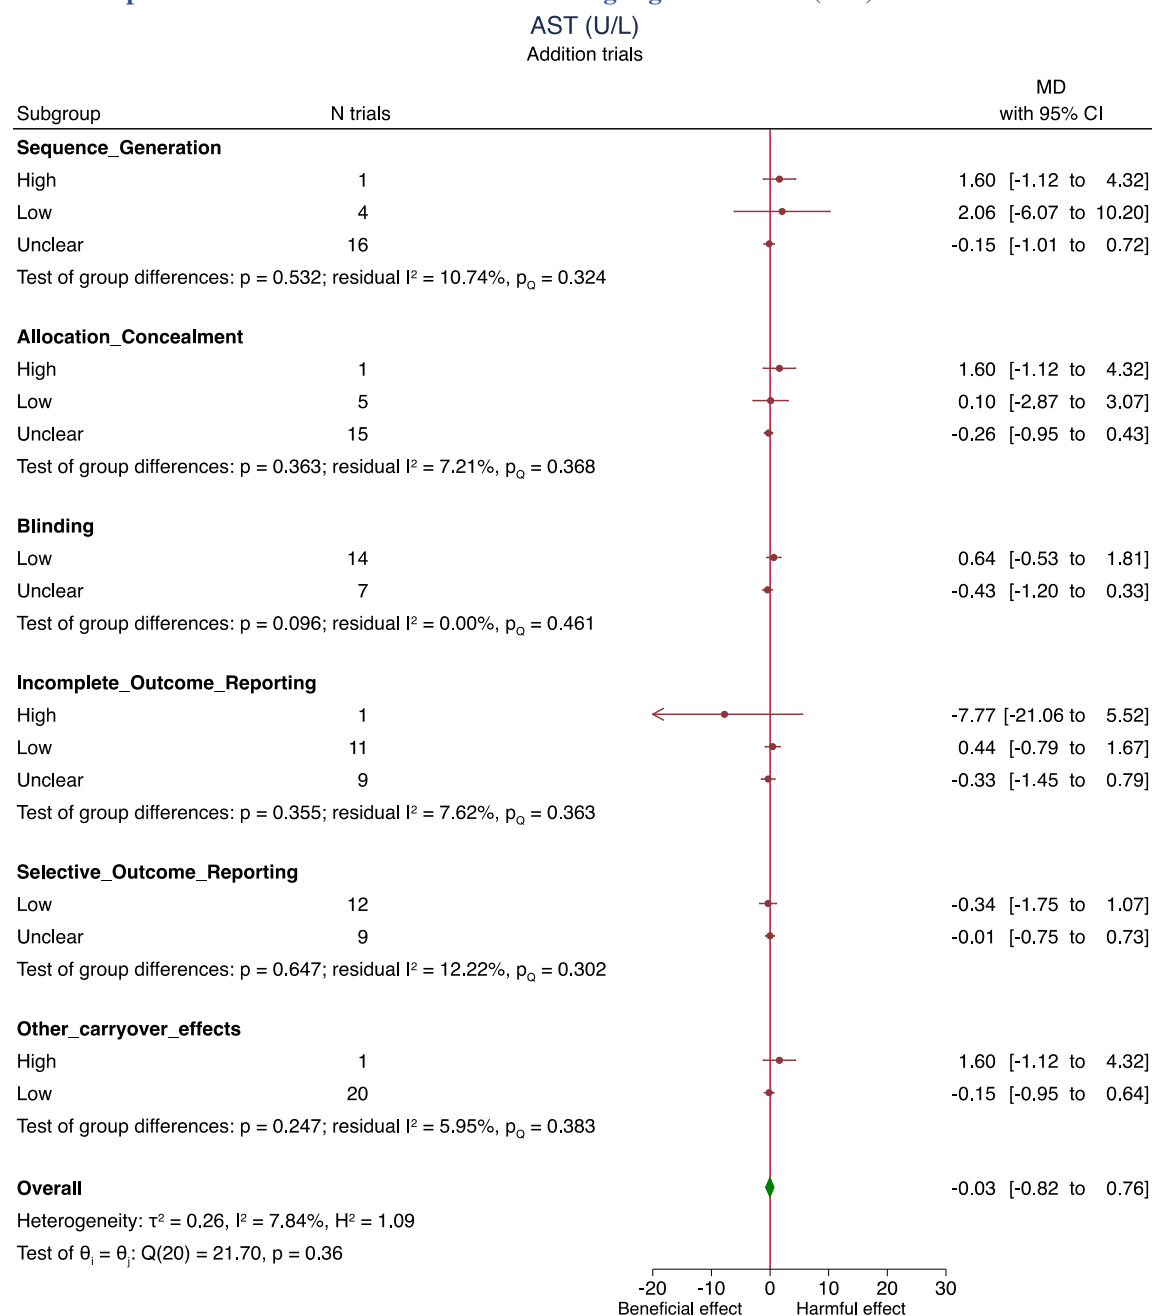

Test of  $\theta = 0$ :  $z = -0.069$ ,  $p = 0.945$

The green diamond represents the pooled estimate for the overall primary analysis of food sources of fructose-containing sugars and AST. Within subgroup mean differences are the pooled effect estimates represented by a red circle. 95% confidence intervals are represented by the line through the circle. Data are expressed as mean differences with 95% confidence intervals using the generic inverse-variance method and random effects DerSimonian-Laird model. Inter-study heterogeneity was assessed using the Cochrane Q statistic and quantified using the  $I^2$  statistic, with significance set at  $p < 0.100$  and  $I^2 \geq 50\%$  considered to be evidence of substantial heterogeneity.  $p < 0.050$  indicates that the effect size differed between levels of the subgroup. AST=aspartate aminotransferase; CI=confidence interval; MD=mean difference; N=number.



### Supplementary Figure S62: Continuous meta-regression analysis for the effect of important food sources of fructose-containing sugars and IHCL (SMD) in substitution trials

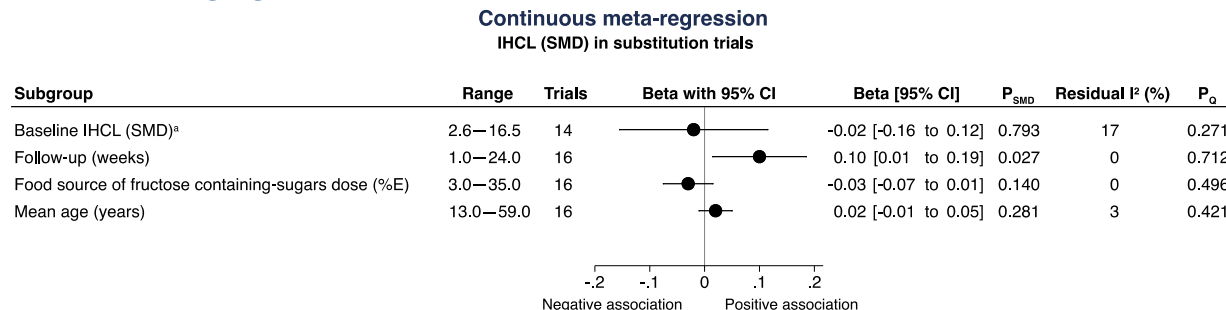

Data is presented as between group mean difference (95% confidence intervals) for a 1-unit change in the predictor variable.  $\beta$ -coefficients were estimated using continuous meta-regression analysis. A positive  $\beta$ -coefficient implies an increase in IHCL with the food source of fructose-containing sugars intervention as the subgroup variable increases, and a negative  $\beta$ -coefficient implies a decrease in uric acid. Residual I<sup>2</sup> reports inter-study heterogeneity not explained by the subgroup and was estimated using the Cochrane Q statistic.

<sup>a</sup> N=2 trials missing data for baseline IHCL.

CI=confidence interval; %E=percentage of total energy intake; IHCL=intrahepatocellular lipid; SMD=standardized mean difference.

### Supplementary Figure S63: Continuous meta-regression analysis for the effect of important food sources of fructose-containing sugars and IHCL (SMD) in addition trials

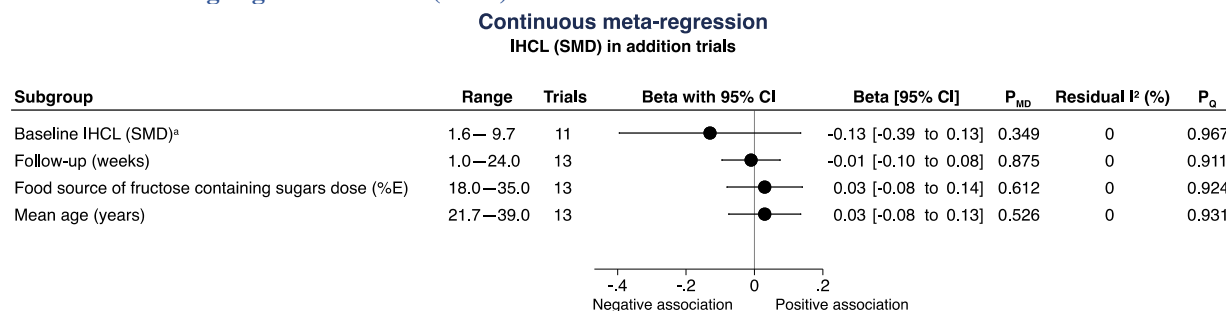

Data is presented as between group mean difference (95% confidence intervals) for a 1-unit change in the predictor variable.  $\beta$ -coefficients were estimated using continuous meta-regression analysis. A positive  $\beta$ -coefficient implies an increase in IHCL with the food source of fructose-containing sugars intervention as the subgroup variable increases, and a negative  $\beta$ -coefficient implies a decrease in uric acid. Residual I<sup>2</sup> reports inter-study heterogeneity not explained by the subgroup and was estimated using the Cochrane Q statistic.

<sup>a</sup>N=2 trials missing data for baseline IHCL.

CI=confidence interval; %E=percentage of total energy intake; IHCL=intrahepatocellular lipid; SMD=standardized mean difference.

### Supplementary Figure S64: Continuous meta-regression analysis for the effect of important food sources of fructose-containing sugars and ALT (U/L) in substitution trials

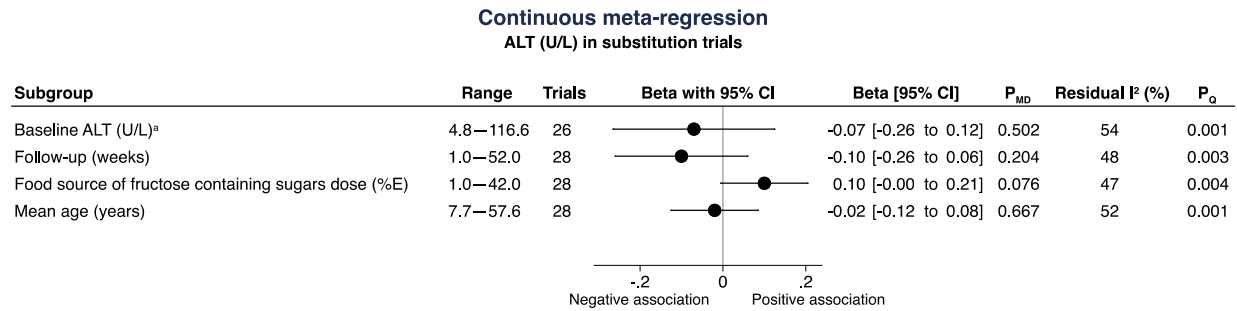

Data is presented as between group mean difference (95% confidence intervals) for a 1-unit change in the predictor variable.  $\beta$ -coefficients were estimated using continuous meta-regression analysis. A positive  $\beta$ -coefficient implies an increase in ALT (U/L) with the food source of fructose-containing sugars intervention as the subgroup variable increases, and a negative  $\beta$ -coefficient implies a decrease in uric acid. Residual I<sup>2</sup> reports inter-study heterogeneity not explained by the subgroup and was estimated using the Cochrane Q statistic.

<sup>a</sup> N=2 trials missing data for baseline ALT.

ALT=alanine aminotransferase; CI=confidence interval; %E=percentage of total energy intake.

### Supplementary Figure S65: Continuous meta-regression analysis for the effect of important food sources of fructose-containing sugars and ALT (U/L) in addition trials

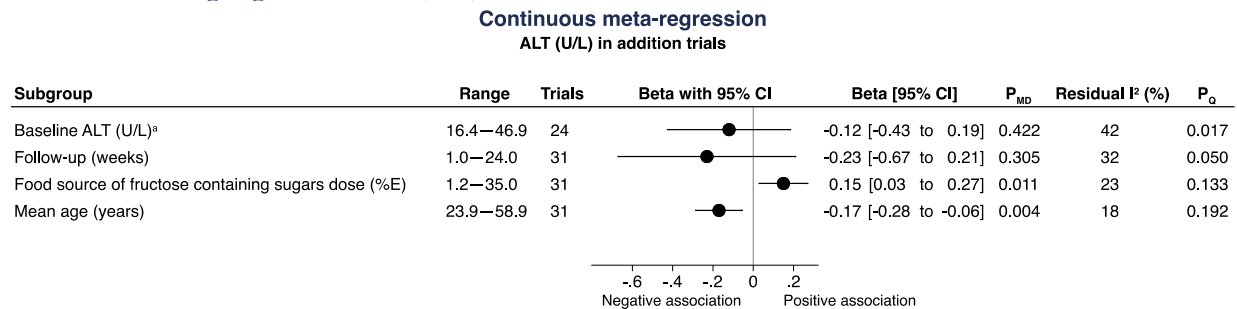

Data is presented as between group mean difference (95% confidence intervals) for a 1-unit change in the predictor variable.  $\beta$ -coefficients were estimated using continuous meta-regression analysis. A positive  $\beta$ -coefficient implies an increase in ALT (U/L) with the food source of fructose-containing sugars intervention as the subgroup variable increases, and a negative  $\beta$ -coefficient implies a decrease in uric acid. Residual I<sup>2</sup> reports inter-study heterogeneity not explained by the subgroup and was estimated using the Cochrane Q statistic.

\*N=7 trials missing data for baseline ALT.

ALT=alanine aminotransferase; CI=confidence interval; %E=percentage of total energy intake.

**Supplementary Figure S66: Continuous meta-regression analysis for the effect of SSB on ALT (U/L) in addition trials**

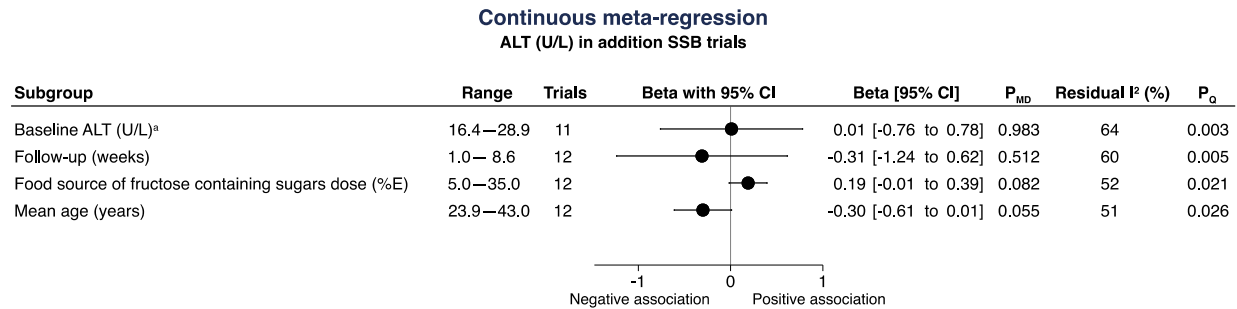

Data is presented as between group mean difference (95% confidence intervals) for a 1-unit change in the predictor variable.  $\beta$ -coefficients were estimated using continuous meta-regression analysis. A positive  $\beta$ -coefficient implies an increase in ALT (U/L) with the food source of fructose-containing sugars intervention as the subgroup variable increases, and a negative  $\beta$ -coefficient implies a decrease in uric acid. Residual I<sup>2</sup> reports inter-study heterogeneity not explained by the subgroup and was estimated using the Cochrane Q statistic.

\*N=1 trial missing data for baseline ALT.

ALT=alanine aminotransferase; CI=confidence interval; %E=percentage of total energy intake.

### Supplementary Figure S67: Continuous meta-regression analysis for the effect of important food sources of fructose-containing sugars and AST (U/L) in substitution trials

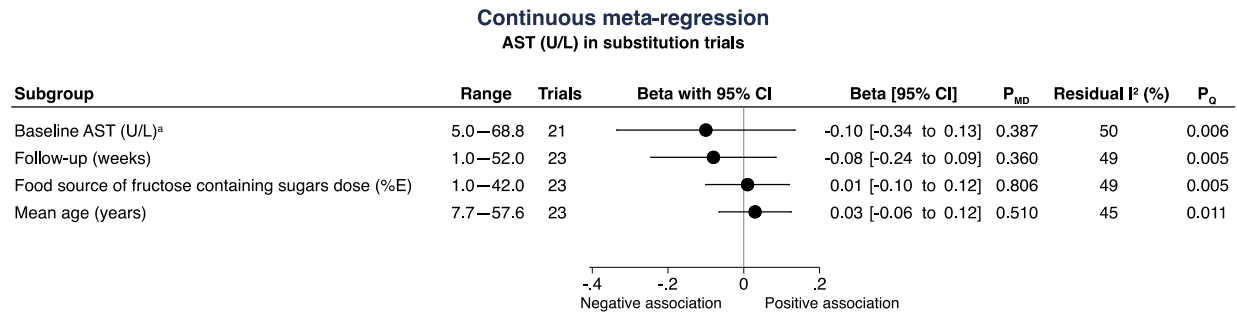

Data is presented as between group mean difference (95% confidence intervals) for a 1-unit change in the predictor variable.  $\beta$ -coefficients were estimated using continuous meta-regression analysis. A positive  $\beta$ -coefficient implies an increase in AST (U/L) with the food source of fructose-containing sugars intervention as the subgroup variable increases, and a negative  $\beta$ -coefficient implies a decrease in uric acid. Residual I<sup>2</sup> reports inter-study heterogeneity not explained by the subgroup and was estimated using the Cochrane Q statistic.

<sup>a</sup> N=2 trials missing data for baseline AST.

AST=aspartate aminotransferase; CI=confidence interval; %E=percentage of total energy intake.

### Supplementary Figure S68: Continuous meta-regression analysis for the effect of important food sources of fructose-containing sugars and AST (U/L) in addition trials

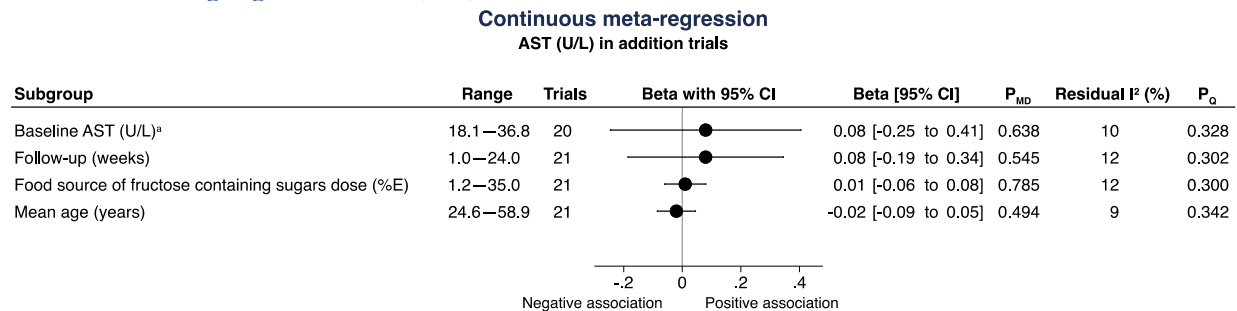

Data is presented as between group mean difference (95% confidence intervals) for a 1-unit change in the predictor variable.  $\beta$ -coefficients were estimated using continuous meta-regression analysis. A positive  $\beta$ -coefficient implies an increase in AST (U/L) with the food source of fructose-containing sugars intervention as the subgroup variable increases, and a negative  $\beta$ -coefficient implies a decrease in uric acid. Residual I<sup>2</sup> reports inter-study heterogeneity not explained by the subgroup and was estimated using the Cochrane Q statistic.

<sup>a</sup> N=1 trial missing data for baseline AST.

AST=aspartate aminotransferase; CI=confidence interval; %E=percentage of total energy intake.

**Supplementary Figure S69: Linear and non-linear meta-regression analyses for the effect of important food sources of fructose-containing sugars dose and IHCL (SMD) in substitution trials**

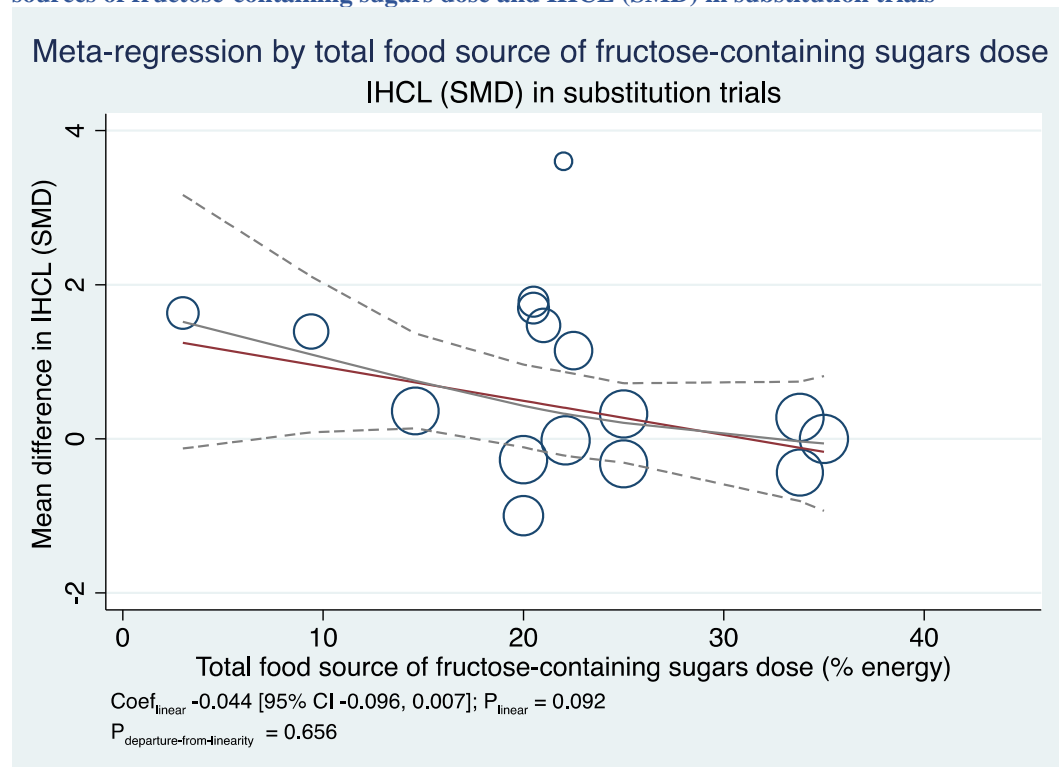

Individual trials are represented by the circles, with their weight in the overall analysis represented by the size of the circles. The straight line represents the estimate dose response for amount of fructose-containing sugars consumed (% of total energy intake) and the dashed lines represent the upper and lower 95% confidence intervals. Coef=coefficient; CI=confidence interval; IHCL=intrahepatocellular lipid; SMD=standardized mean difference.

**Supplementary Figure S70: Linear and non-linear meta-regression analyses for the effect of important food sources of fructose-containing sugars dose and IHCL (SMD) in addition trials**

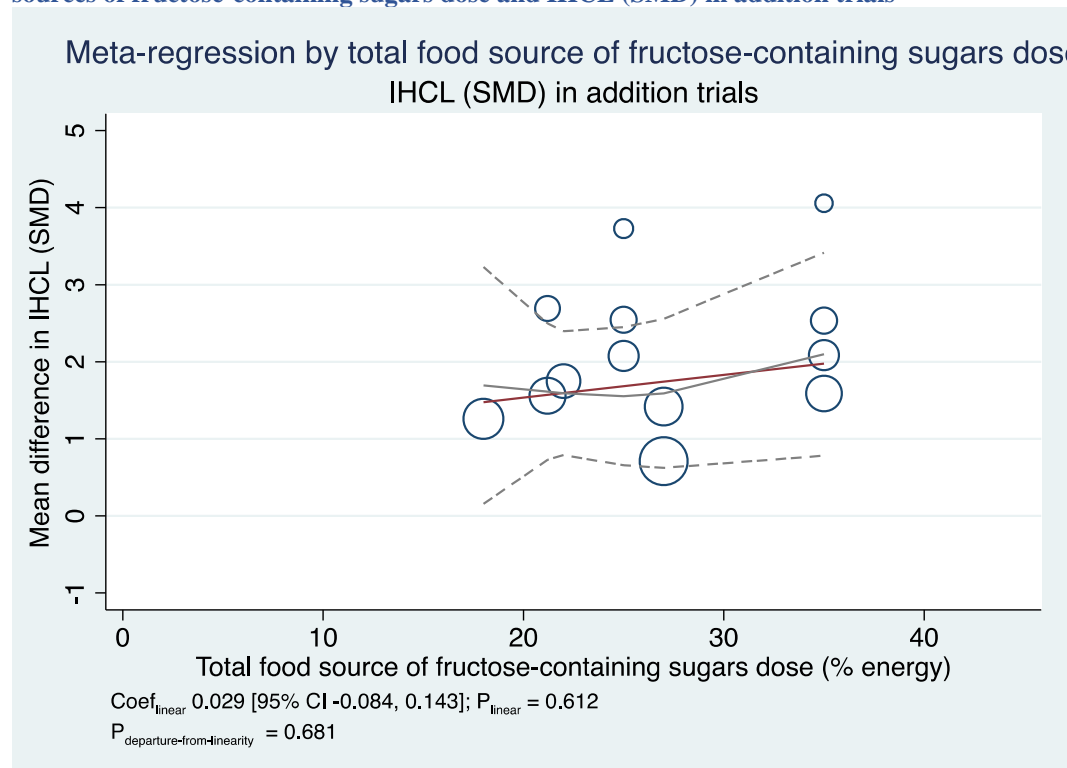

Individual trials are represented by the circles, with their weight in the overall analysis represented by the size of the circles. The straight line represents the estimate dose response for amount of fructose-containing sugars consumed (% of total energy intake) and the dashed lines represent the upper and lower 95% confidence intervals. Coef=coefficient; CI=confidence interval; IHCL=intrahepatocellular lipid; SMD=standardized mean difference.

**Supplementary Figure S71: Linear and non-linear meta-regression analyses for the effect of important food sources of fructose-containing sugars dose and ALT (U/L) in substitution trials**

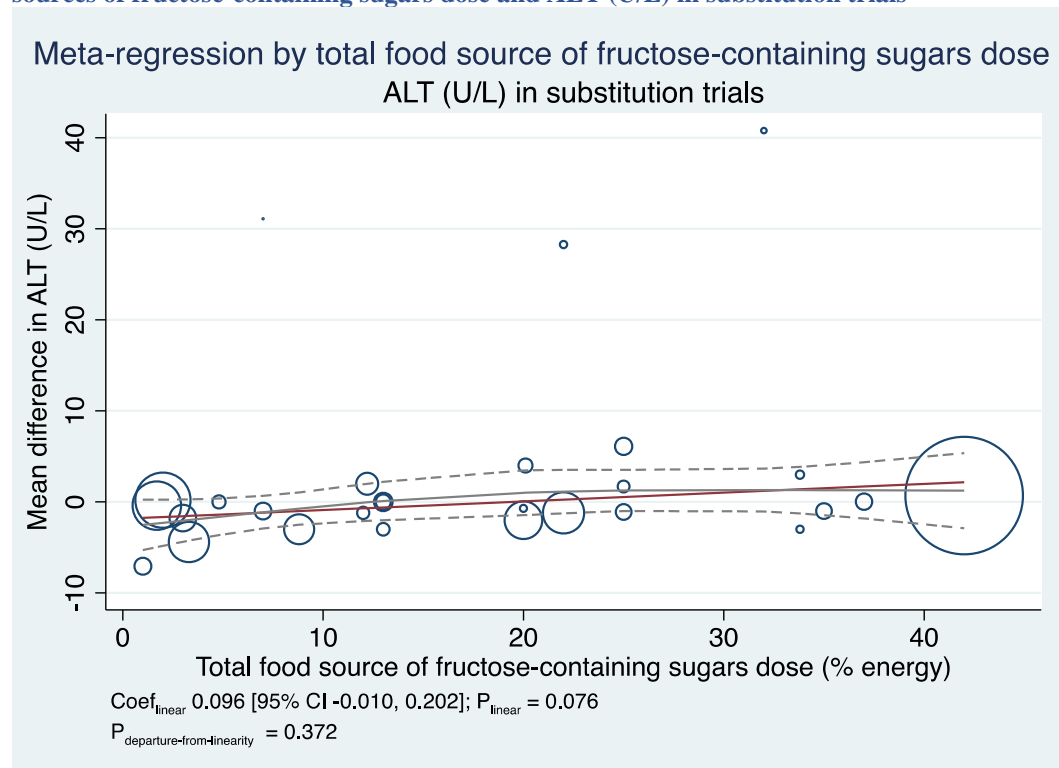

Individual trials are represented by the circles, with their weight in the overall analysis represented by the size of the circles. The straight line represents the estimate dose response for amount of fructose-containing sugars consumed (% of total energy intake) and the dashed lines represent the upper and lower 95% confidence intervals. ALT=alanine aminotransferase; coef=coefficient; CI=confidence interval.

**Supplementary Figure S72: Linear and non-linear meta-regression analyses for the effect of important food sources of fructose-containing sugars dose and ALT (U/L) in addition trials**

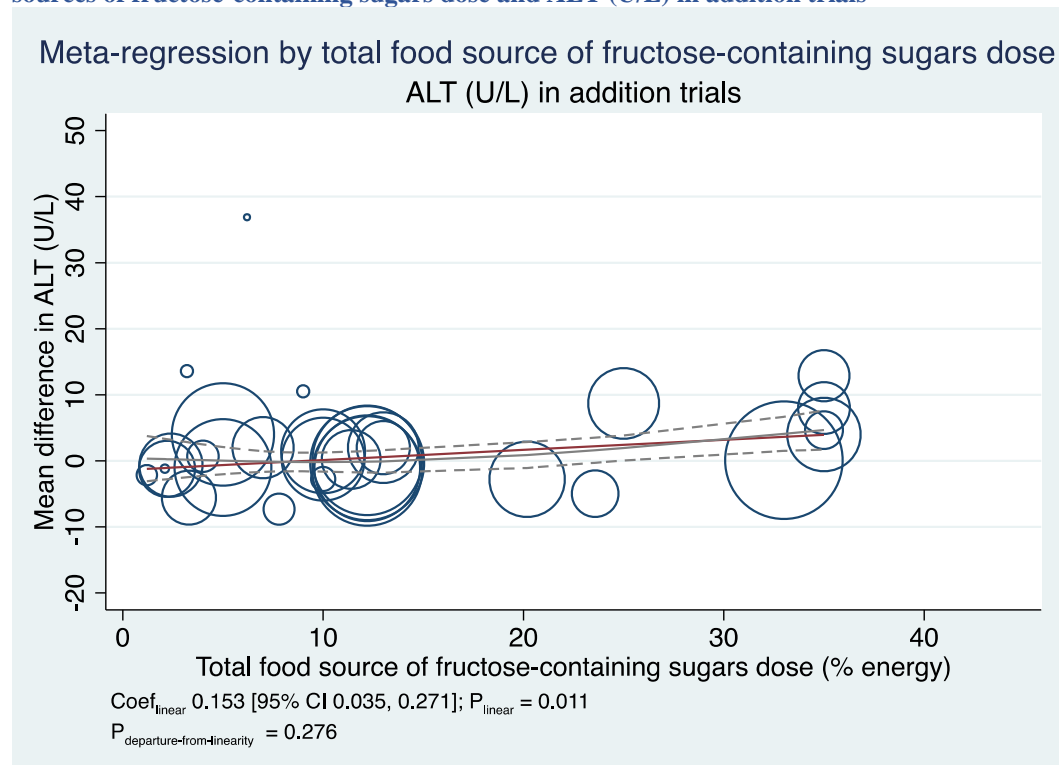

Individual trials are represented by the circles, with their weight in the overall analysis represented by the size of the circles. The straight line represents the estimate dose response for amount of fructose-containing sugars consumed (% of total energy intake) and the dashed lines represent the upper and lower 95% confidence intervals.

To convert coefficient to represent per serving of total sugars in a meal, multiply by 6 since according to national survey data, the average intake of total sugars is 18%E, which divided by 3 (for serving per meal) is 6%E(6). Thus, the equation can be expressed as 0.153U/L (95% CI: 0.035 to 0.271) \* 6 = 0.918U/L (95% CI: 0.21, 1.626) per serving (6%E) of sugars in a meal

ALT=alanine aminotransferase; coef=coefficient; CI=confidence interval; %E=percentage of total energy intake.



**Supplementary Figure S73: Linear and non-linear meta-regression analyses for the effect of SSBs on ALT (U/L) in addition trials**

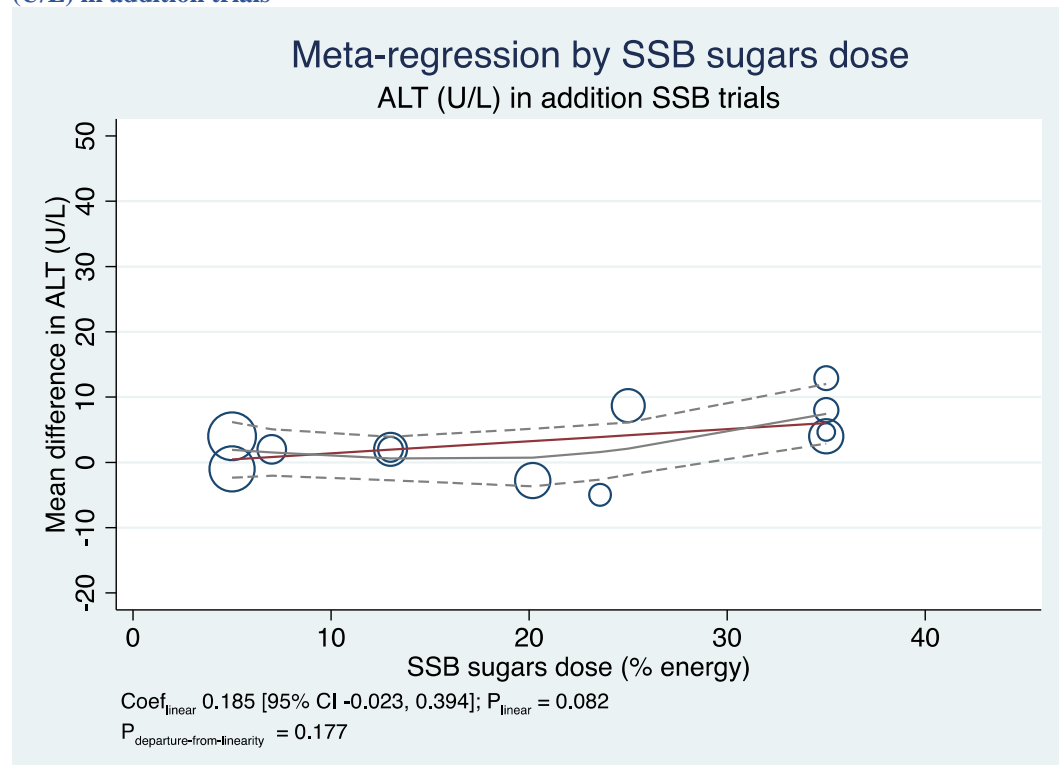

Individual trials are represented by the circles, with their weight in the overall analysis represented by the size of the circles. The straight line represents the estimate dose response for amount of fructose-containing sugars consumed (% of total energy intake) and the dashed lines represent the upper and lower 95% confidence intervals.

Linear and non-linear dose response not possible for fruit; dried fruit; added nutritive (caloric) sweetener; sweets and desserts; and mixed sources as there were fewer than six trial comparisons or only one unique dose was available.

To convert coefficient to represent per serving of SSB, multiply by 8 since 1 can (355mL) of cola is ~40g sugar or about 8%E of a 2000kcal diet. Thus, the equation can be expressed as 0.185U/L (95% CI: -0.023 to 0.394) \* 8 = 1.48U/L (95% CI: -0.184, 3.152) per serving (355ml, 8%E) of SSB.

ALT=alanine aminotransferase; coef=coefficient; CI=confidence interval; %E=percentage of total energy intake; SSB=sugar-sweetened beverage.

**Supplementary Figure S74: Linear and non-linear meta-regression analyses for the effect of 100% fruit juice on ALT (U/L) in addition trials**

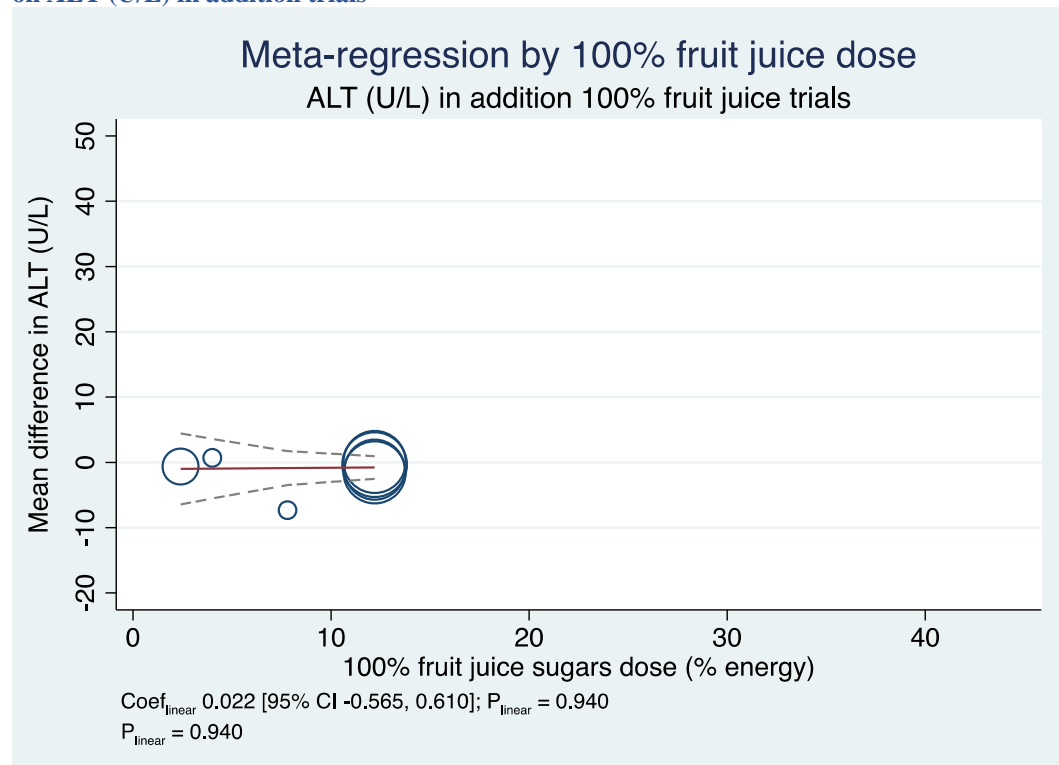

Individual trials are represented by the circles, with their weight in the overall analysis represented by the size of the circles. The straight line represents the estimate dose response for amount of fructose-containing sugars consumed (% of total energy intake) and the dashed lines represent the upper and lower 95% confidence intervals.

Linear and non-linear dose response not possible for fruit; dried fruit; added nutritive (caloric) sweetener; sweets and desserts; and mixed sources as there were fewer than six trial comparisons or only one unique dose was available.

To convert coefficient to represent per serving of SSB, multiply by 8 since 1 can (355mL) of cola is ~40g sugar or about 8%E of a 2000kcal diet. Thus, the equation can be expressed as 0.185U/L (95% CI: -0.023 to 0.394) \* 8 = 1.48U/L (95% CI: -0.184, 3.152) per serving (355ml, 8%E) of SSB.

ALT=alanine aminotransferase; coef=coefficient; CI=confidence interval; %E=percentage of total energy intake.

**Supplementary Figure S75: Linear and non-linear meta-regression analyses for the effect of important food sources of fructose-containing sugars dose and ALT (U/L) in subtraction trials**

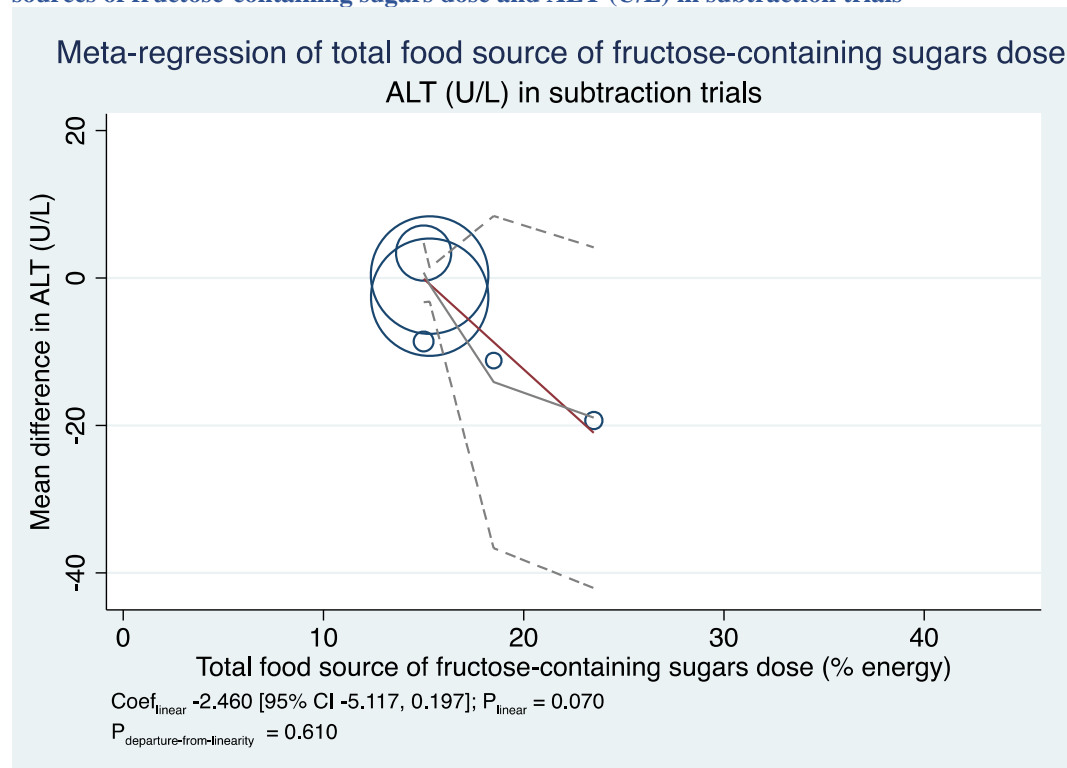

Individual trials are represented by the circles, with their weight in the overall analysis represented by the size of the circles. The straight line represents the estimate dose response for amount of fructose-containing sugars consumed (% of total energy intake) and the dashed lines represent the upper and lower 95% confidence intervals. ALT=alanine aminotransferase; coef=coefficient; CI=confidence interval; %E=percentage of total energy intake.

**Supplementary Figure S76: Linear and non-linear meta-regression analyses for the effect of important food sources of fructose-containing sugars dose and AST (U/L) in substitution trials**

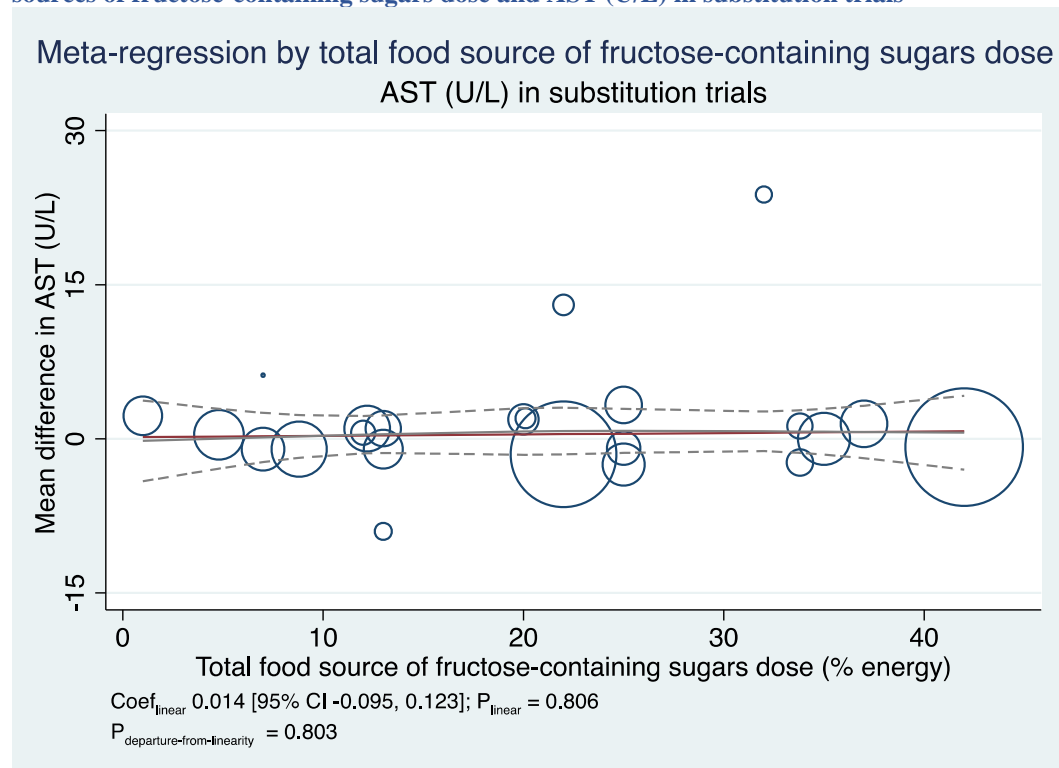

Individual trials are represented by the circles, with their weight in the overall analysis represented by the size of the circles. The straight line represents the estimate dose response for amount of fructose-containing sugars consumed (% of total energy intake) and the dashed lines represent the upper and lower 95% confidence intervals. AST=aspartate aminotransferase; coef=coefficient; CI=confidence interval; %E=percentage of total energy intake.

**Supplementary Figure S77: Linear and non-linear meta-regression analyses for the effect of important food sources of fructose-containing sugars dose and AST (U/L) in addition trials**

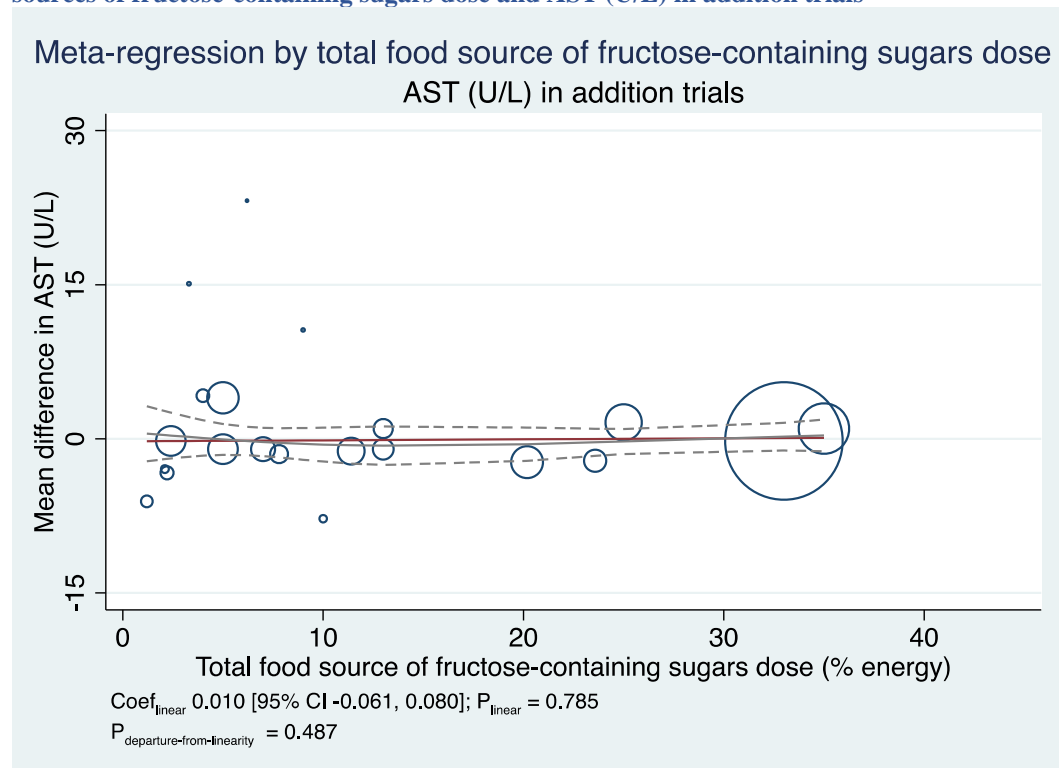

Individual trials are represented by the circles, with their weight in the overall analysis represented by the size of the circles. The straight line represents the estimate dose response for amount of fructose-containing sugars consumed (% of total energy intake) and the dashed lines represent the upper and lower 95% confidence intervals. AST=aspartate aminotransferase; coef=coefficient; CI=confidence interval; %E=percentage of total energy intake.

**Supplementary Figure S78: Linear and non-linear meta-regression analyses for the effect of SSBs on AST (U/L) in addition trials**

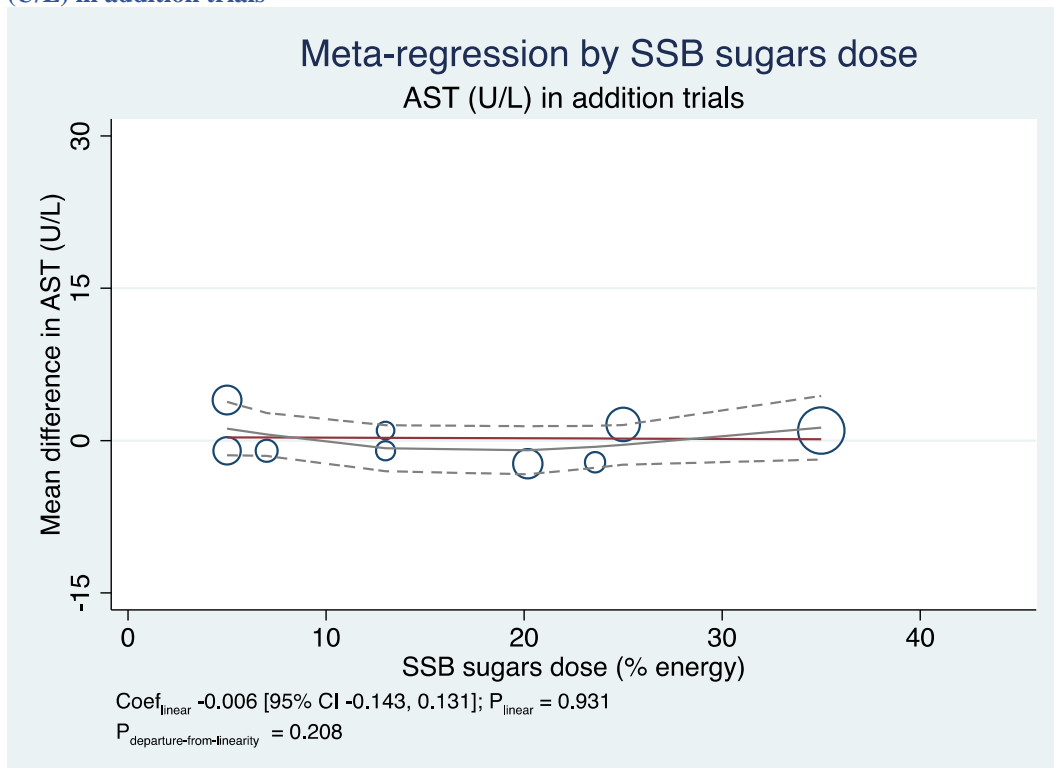

Individual trials are represented by the circles, with their weight in the overall analysis represented by the size of the circles. The straight line represents the estimate dose response for amount of fructose-containing sugars consumed (% of total energy intake) and the dashed lines represent the upper and lower 95% confidence intervals. AST=aspartate aminotransferase; coef=coefficient; CI=confidence interval; %E=percentage of total energy intake; SSB=sugar-sweetened beverage.

**Supplementary Figure S79: Linear and non-linear meta-regression analyses for the effect of important food sources of fructose-containing sugars dose and AST (U/L) in subtraction trials**

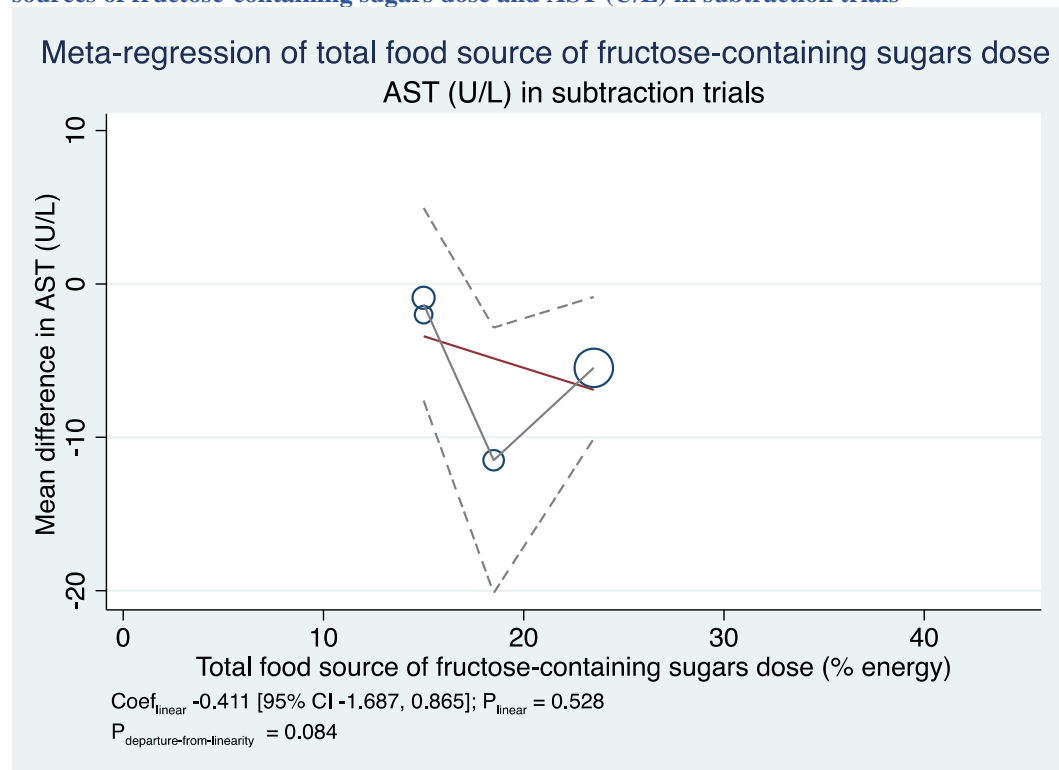

Individual trials are represented by the circles, with their weight in the overall analysis represented by the size of the circles. The straight line represents the estimate dose response for amount of fructose-containing sugars consumed (% of total energy intake) and the dashed lines represent the upper and lower 95% confidence intervals. AST=aspartate aminotransferase; coef=coefficient; CI=confidence interval.

**Supplementary Figure S80: Non-linear dose-response analysis using public thresholds of 5%, 10%, and 25% of energy for the effect of important food sources of fructose-containing sugars and IHCL (SMD) in substitution trials**

A

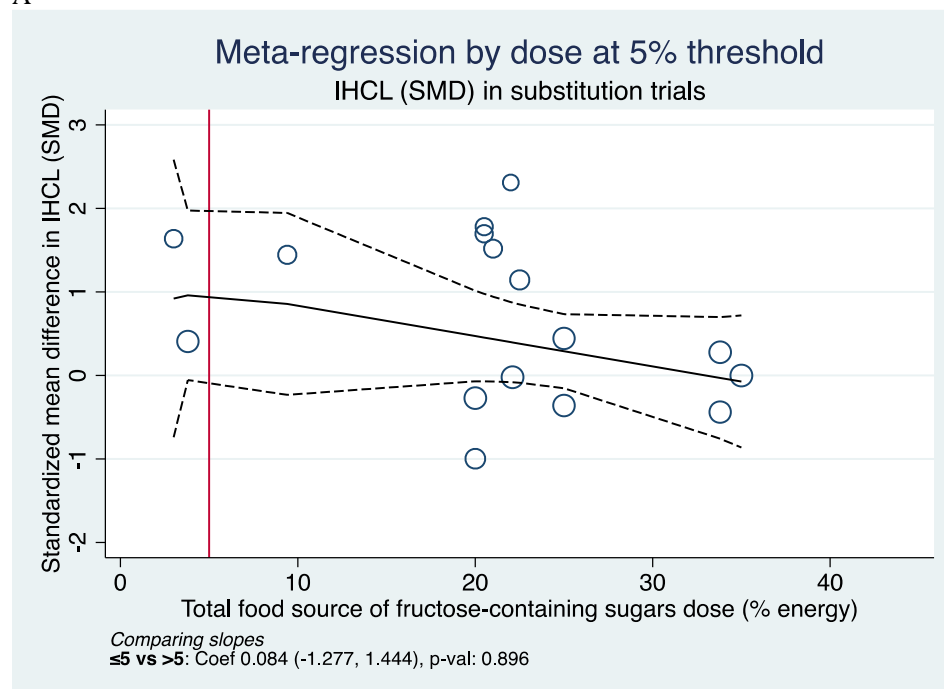

B

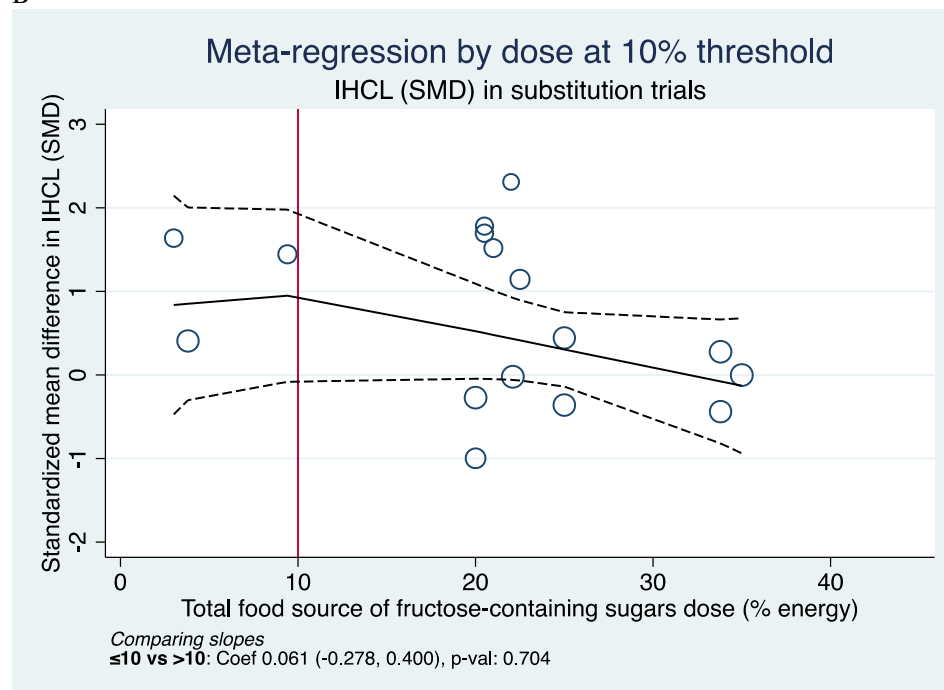



C

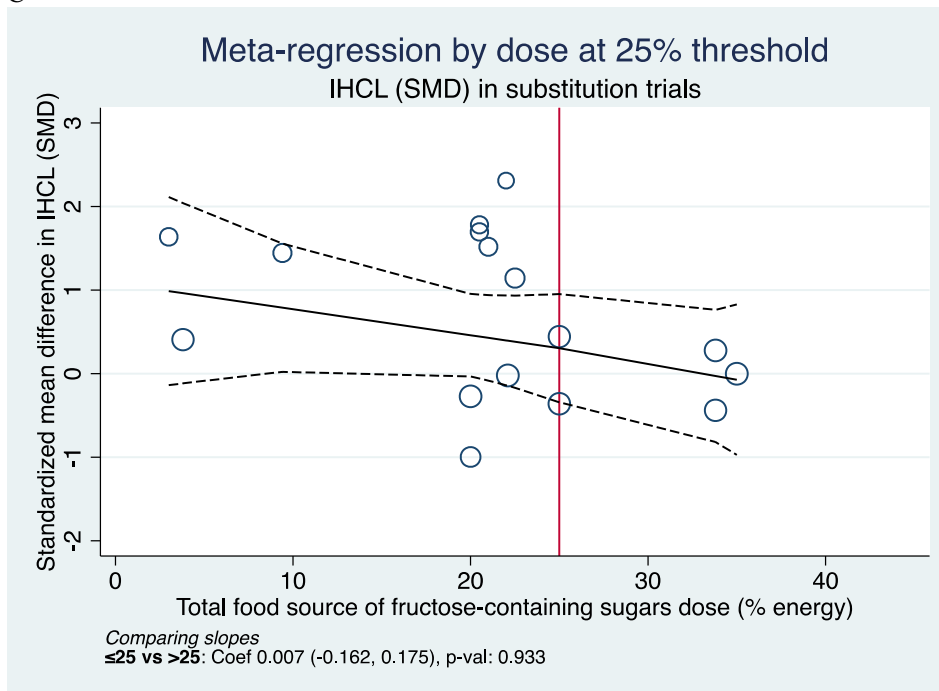

Individual trials are represented by the circles, with their weight in the overall analysis represented by the size of the circles. The straight line represents the estimate dose response for amount of fructose-containing sugars consumed (% of total energy intake) and the dashed lines represent the upper and lower 95% confidence intervals.

Panel A: 5% threshold; B: 10% threshold; C: 25% threshold.

Coef=coefficient; IHCL=intrahepatocellular lipid; SMD=standardized mean difference.

**Supplementary Figure S81: Non-linear dose-response analysis using public threshold of 25% energy for the effect of important food sources of fructose-containing sugars and IHCL (SMD) in addition trials**

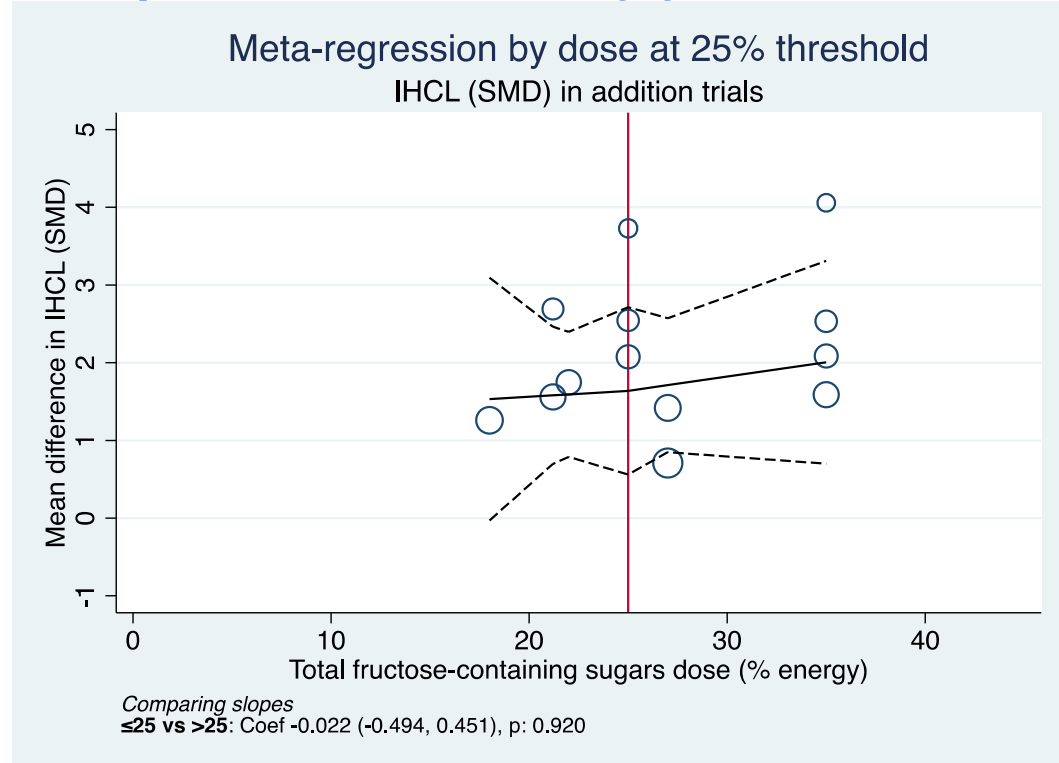

Individual trials are represented by the circles, with their weight in the overall analysis represented by the size of the circles. The straight line represents the estimate dose response for amount of fructose-containing sugars consumed (% of total energy intake) and the dashed lines represent the upper and lower 95% confidence intervals.

Non-linear dose-response analysis using public thresholds of 5% and 10% of energy was not conducted as there were no trials included which had a dose less than 10% of total energy.

Coef=coefficient; IHCL=intrahepatocellular lipid; SMD=standardized mean difference.

**Supplementary Figure S82: Non-linear dose-response analysis using public thresholds of 5%, 10%, and 25% of energy for the effect of important food sources of fructose-containing sugars and ALT (U/L) in substitution trials**

A

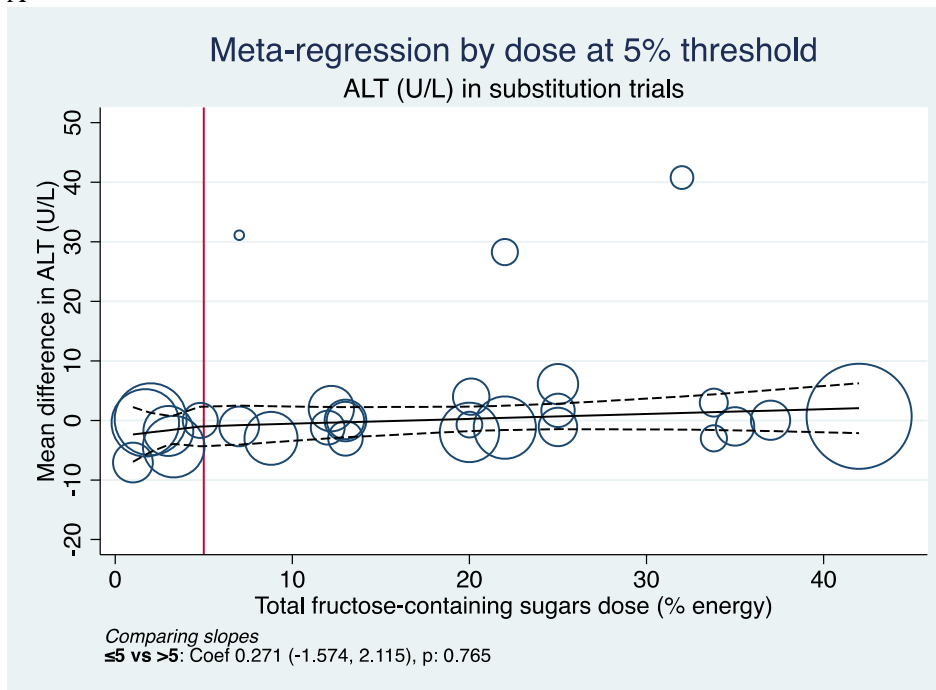

B

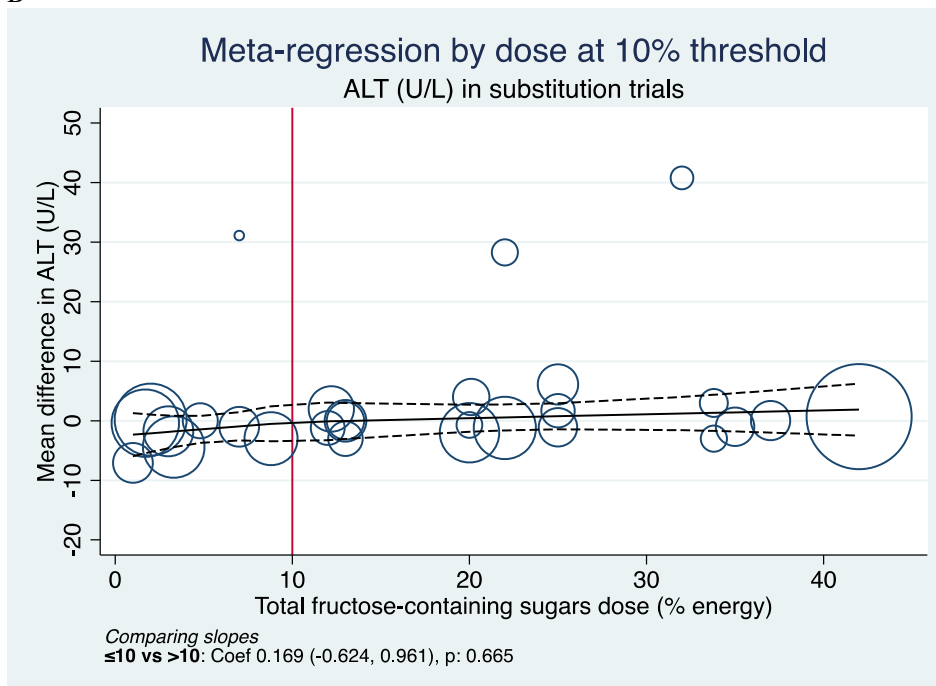

C

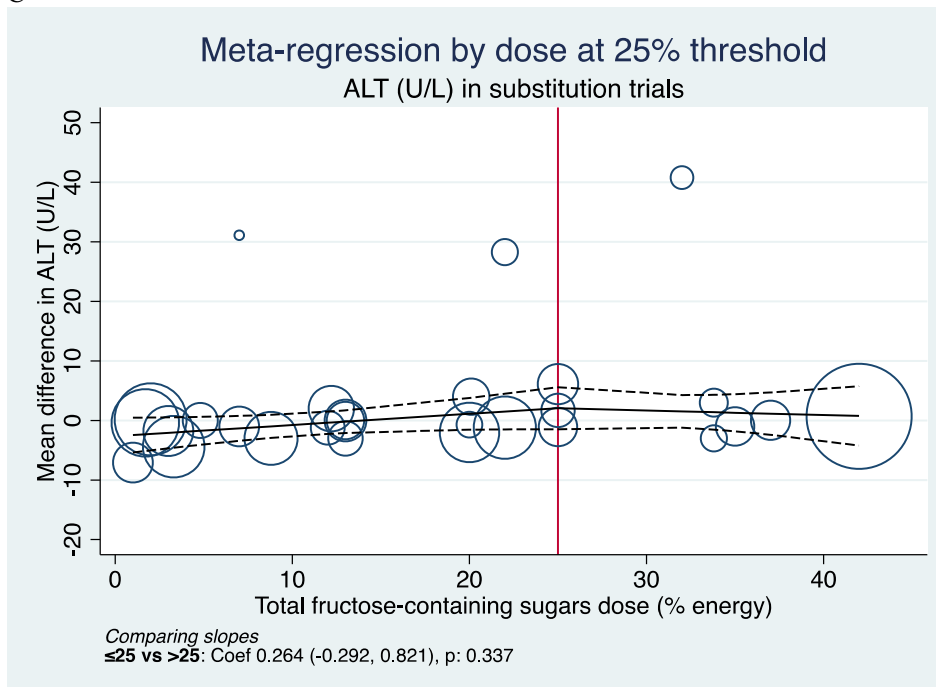

Individual trials are represented by the circles, with their weight in the overall analysis represented by the size of the circles. The horizontal straight line represents the estimate dose response for amount of fructose-containing sugars consumed (% of total energy intake), and the dashed lines represent the upper and lower 95% confidence intervals. The vertical straight lines represent the threshold knots.

Panel A: 5% threshold; B: 10% threshold; C: 25% threshold.

ALT=alanine aminotransferase; coef=coefficient; SSB=sugar-sweetened beverage.

**Supplementary Figure S83: Non-linear dose-response analysis using public thresholds of 5%, 10%, and 25% of energy for the effect of important food sources of fructose-containing sugars and ALT (U/L) in addition trials**

A

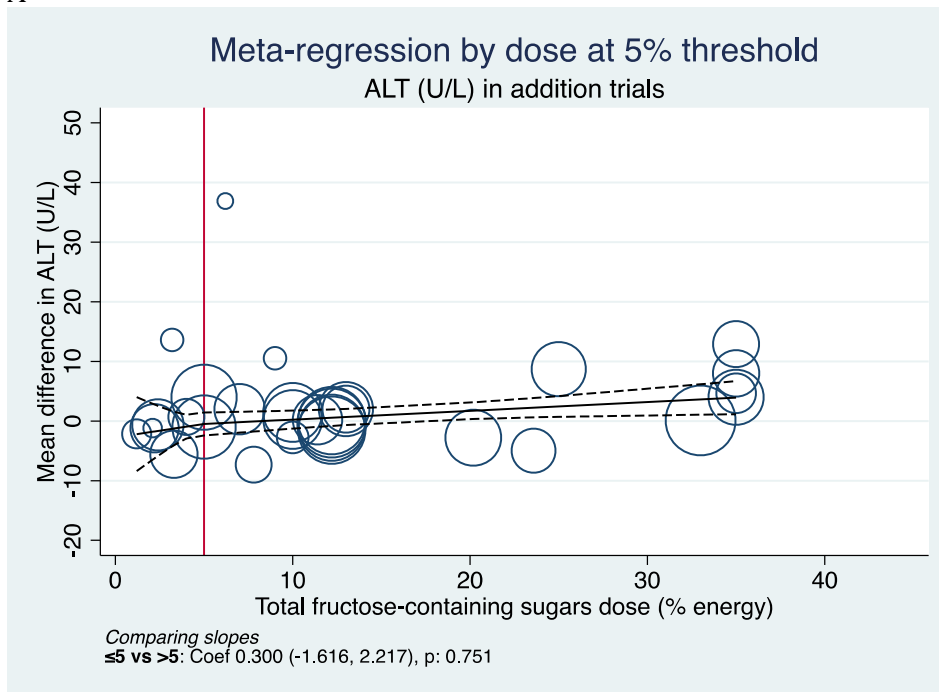

B

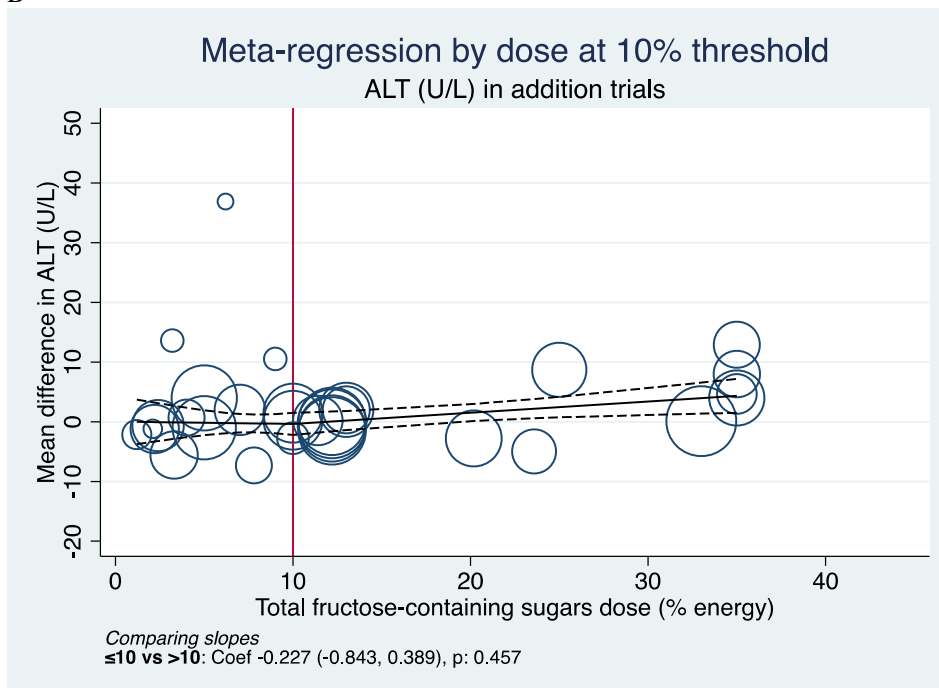

C

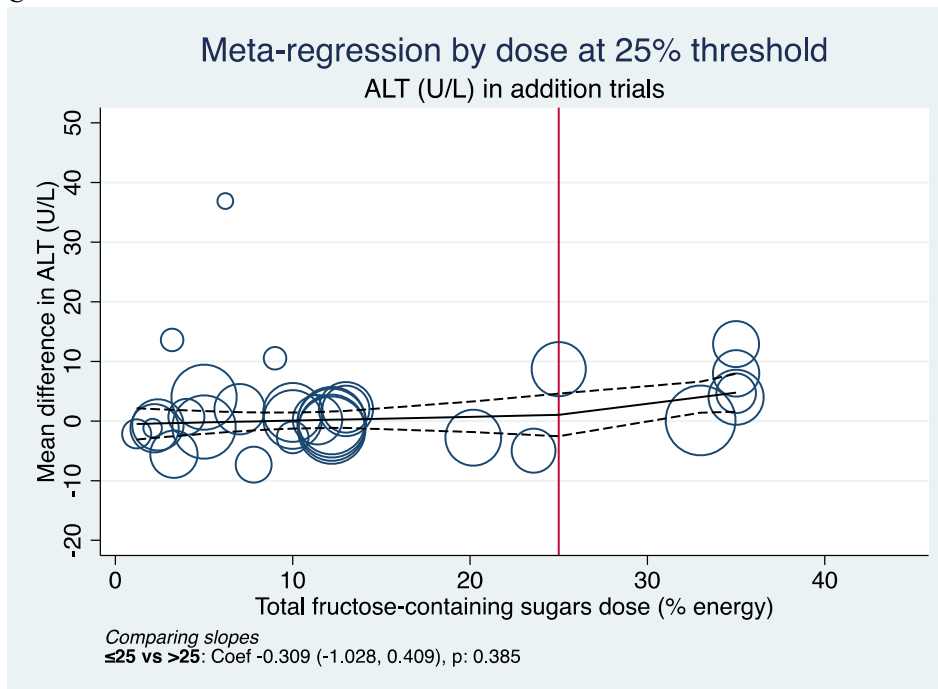

Individual trials are represented by the circles, with their weight in the overall analysis represented by the size of the circles. The straight line represents the estimate dose response for amount of fructose-containing sugars consumed (% of total energy intake) and the dashed lines represent the upper and lower 95% confidence intervals.

Panel A: 5% threshold; B: 10% threshold; C: 25% threshold.

ALT=alanine aminotransferase; coef=coefficient.

**Supplementary Figure S84: Non-linear dose-response analysis using public thresholds of 10% and 25% of energy for the effect of SSBs on ALT (U/L) in addition trials**

A

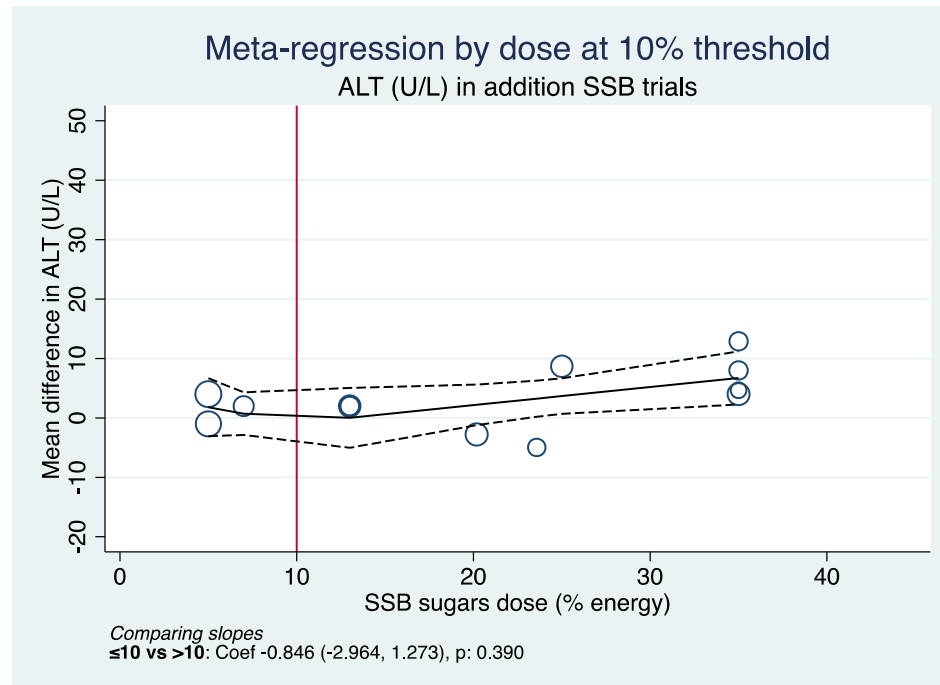

B

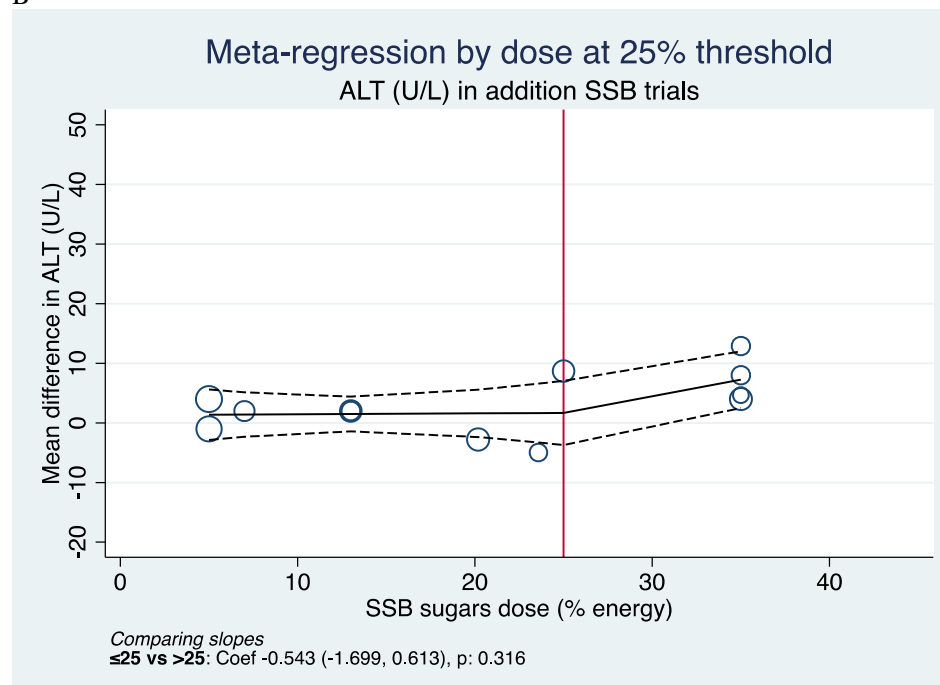

Individual trials are represented by the circles, with their weight in the overall analysis represented by the size of the circles. The straight line represents the estimate dose response for amount of fructose-containing sugars consumed (% of total energy intake) and the dashed lines represent the upper and lower 95% confidence intervals.

Panel A: 10% threshold; B: 25% threshold.

ALT=alanine aminotransferase; coef=coefficient; SSBs=sugar-sweetened beverage.

**Supplementary Figure S85: Non-linear dose-response analysis using public thresholds of 5% and 10% of energy for the effect of 100% fruit juice on ALT (U/L) in addition trials**

A

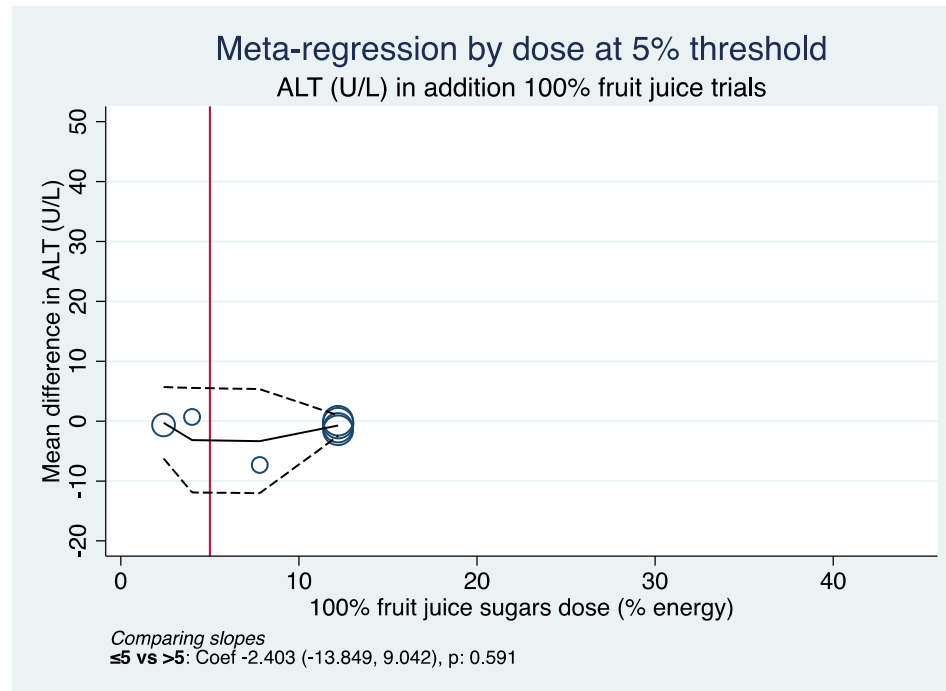

B

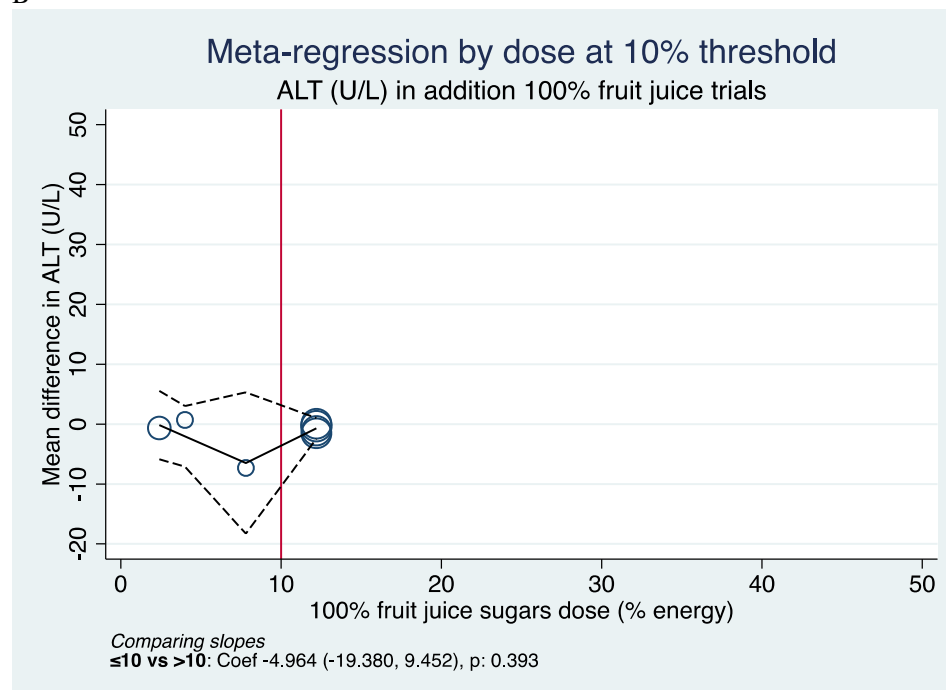

Individual trials are represented by the circles, with their weight in the overall analysis represented by the size of the circles. The straight line represents the estimate dose response for amount of fructose-containing sugars consumed (% of total energy intake) and the dashed lines represent the upper and lower 95% confidence intervals.

Panel A: 5% threshold; B: 10% threshold.

ALT=alanine aminotransferase; coef=coefficient.



**Supplementary Figure S86: Non-linear dose-response analysis using public thresholds of 5%, 10%, and 25% of energy for the effect of important food sources of fructose-containing sugars and AST (U/L) in substitution trials**

A

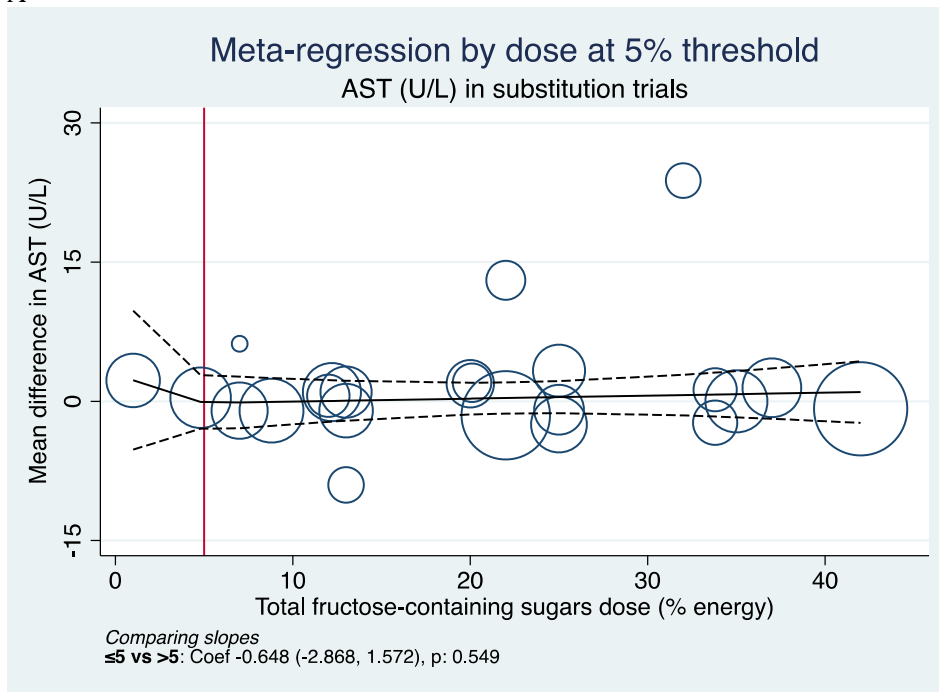

B

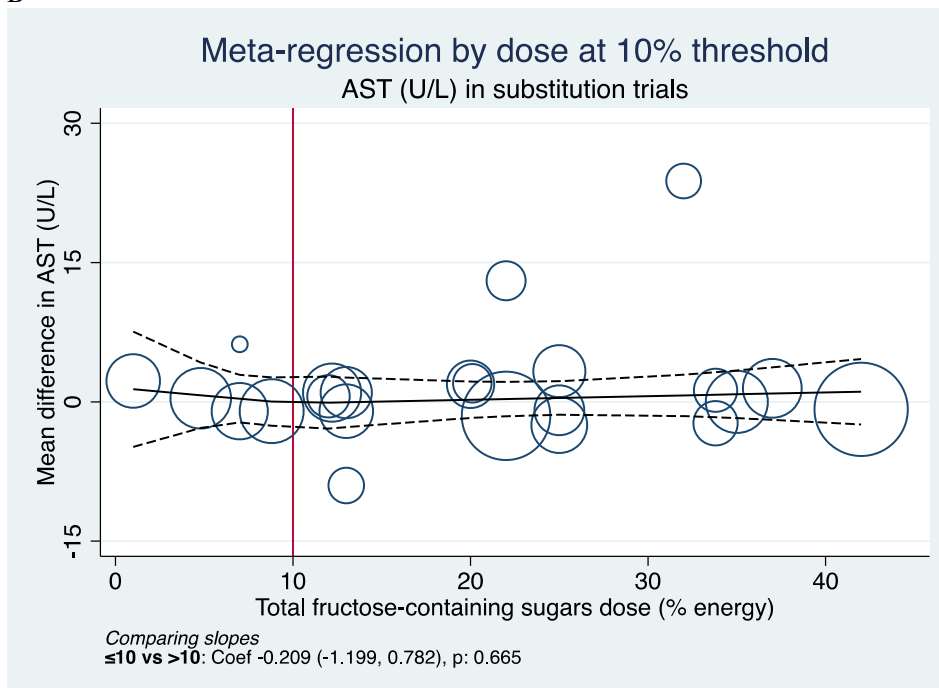

C

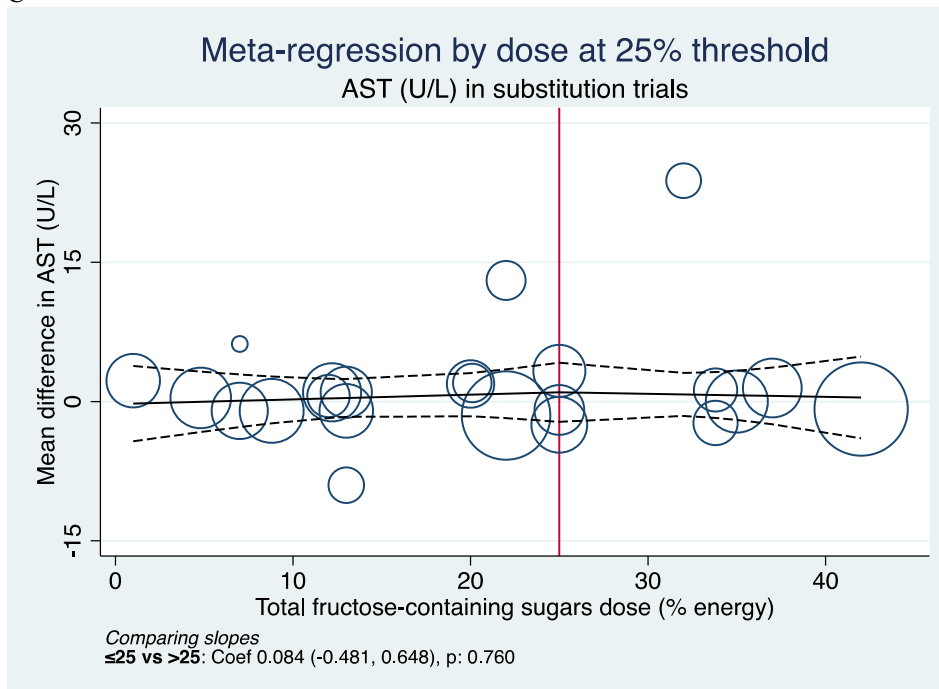

Individual trials are represented by the circles, with their weight in the overall analysis represented by the size of the circles. The horizontal straight line represents the estimate dose response for amount of fructose-containing sugars consumed (% of total energy intake), and the dashed lines represent the upper and lower 95% Confidence Intervals. The vertical straight lines represent the threshold knots.

Panel A: 5% threshold; B: 10% threshold; C: 25% threshold.

AST=aspartate aminotransferase; coef=coefficient.

**Supplementary Figure S87: Non-linear dose-response analysis using public thresholds of 5%, 10%, and 25% of energy for the effect of important food sources of fructose-containing sugars and AST (U/L) in addition trials**

A

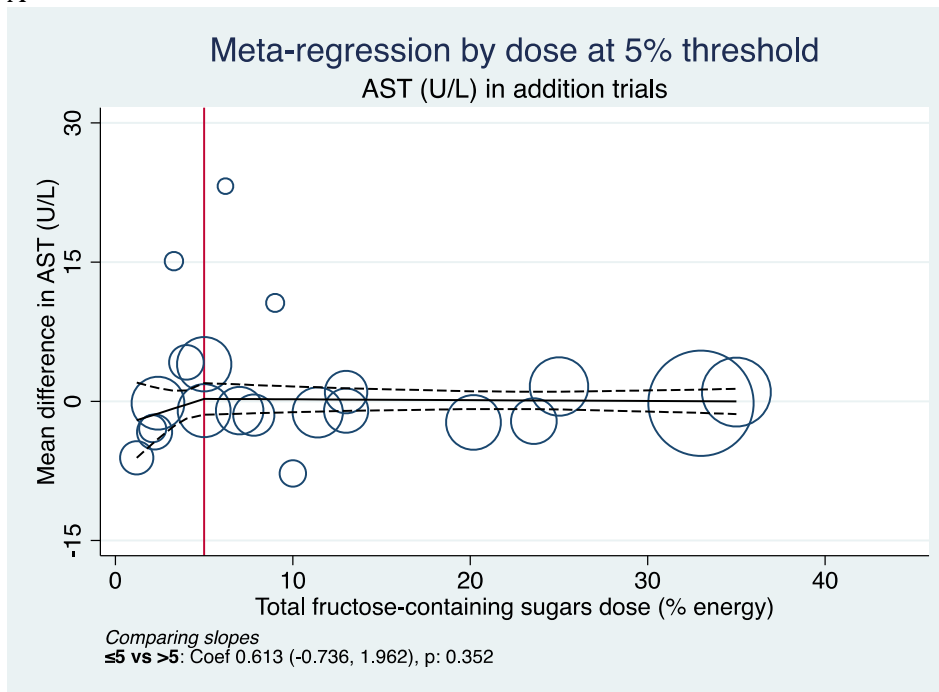

B

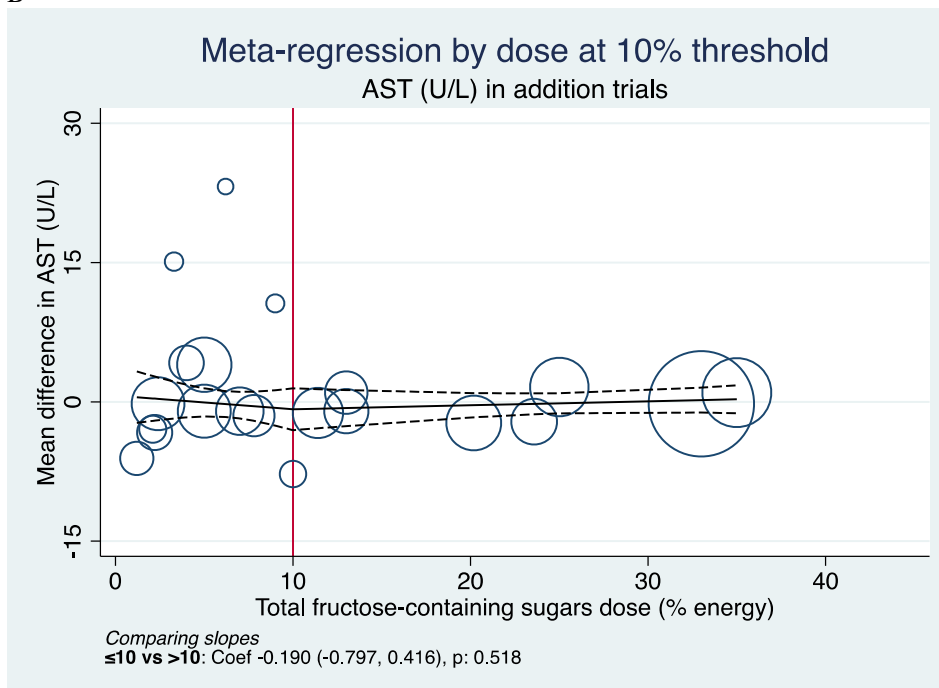

C

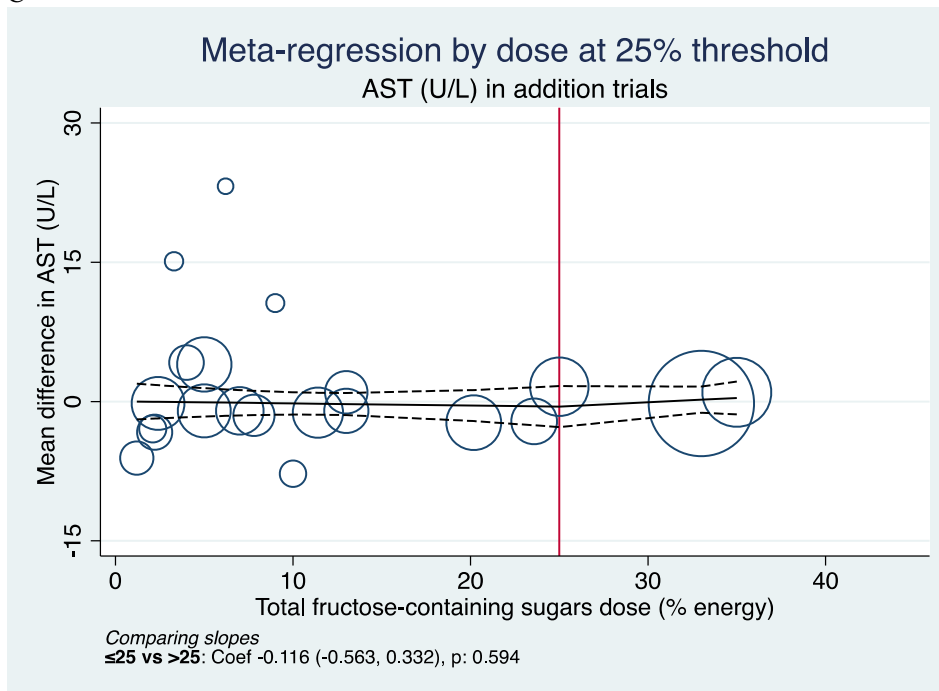

Individual trials are represented by the circles, with their weight in the overall analysis represented by the size of the circles. The horizontal straight line represents the estimate dose response for amount of fructose-containing sugars consumed (% of total energy intake), and the dashed lines represent the upper and lower 95% Confidence Intervals. The vertical straight lines represent the threshold knots.

Panel A: 5% threshold; B: 10% threshold; C: 25% threshold.

AST=aspartate aminotransferase; coef=coefficient.

**Supplementary Figure S88: Non-linear dose-response analysis using public thresholds of 5%, 10%, and 25% of energy for the effect of SSBs on AST (U/L) in addition trials**

A

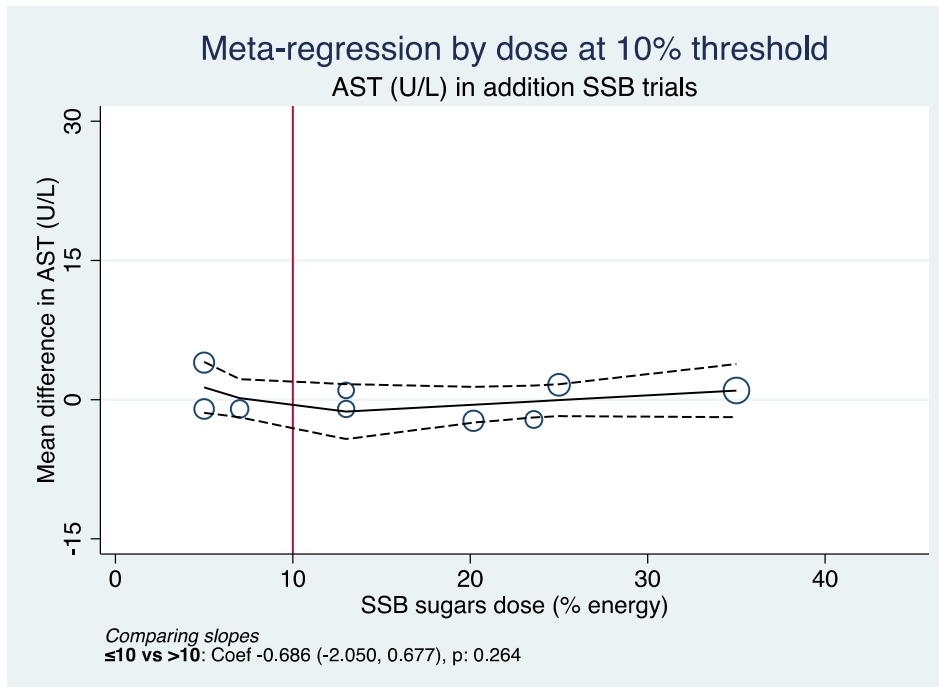

B

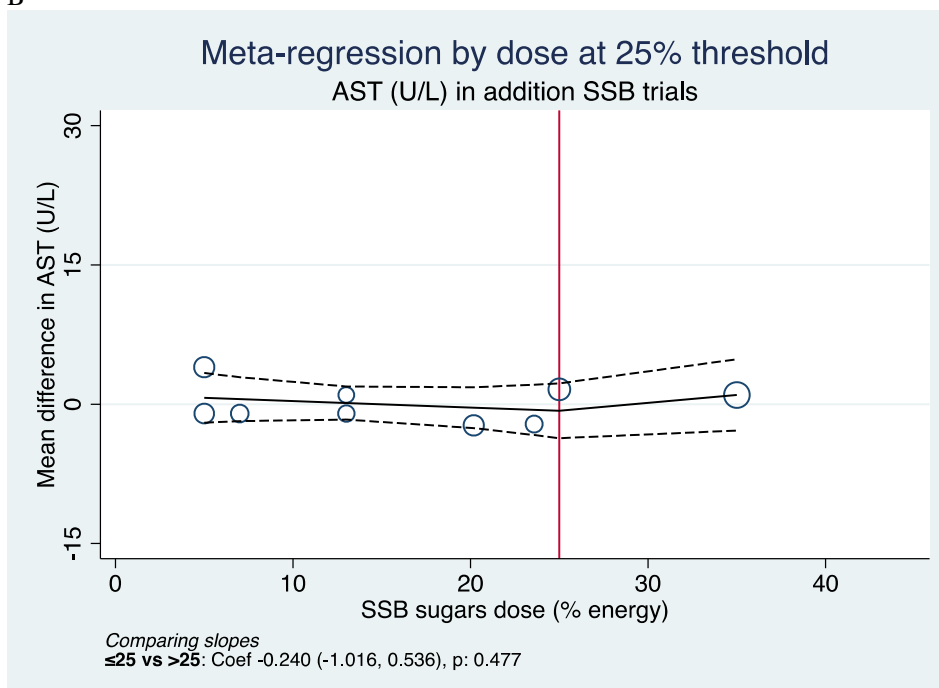

Individual trials are represented by the circles, with their weight in the overall analysis represented by the size of the circles. The horizontal straight line represents the estimate dose response for amount of fructose-containing sugars consumed (% of total energy intake), and the dashed lines represent the upper and lower 95% Confidence Intervals. The vertical straight lines represent the threshold knots.

Panel A: 10% threshold; B: 25% threshold.

AST=aspartate aminotransferase; coef=coefficient; SSB=sugar-sweetened beverage.

**Supplementary Figure S89: Publication bias funnel plots for the effect of important food sources of fructose-containing sugars and IHCL (SMD) in substitution trials**

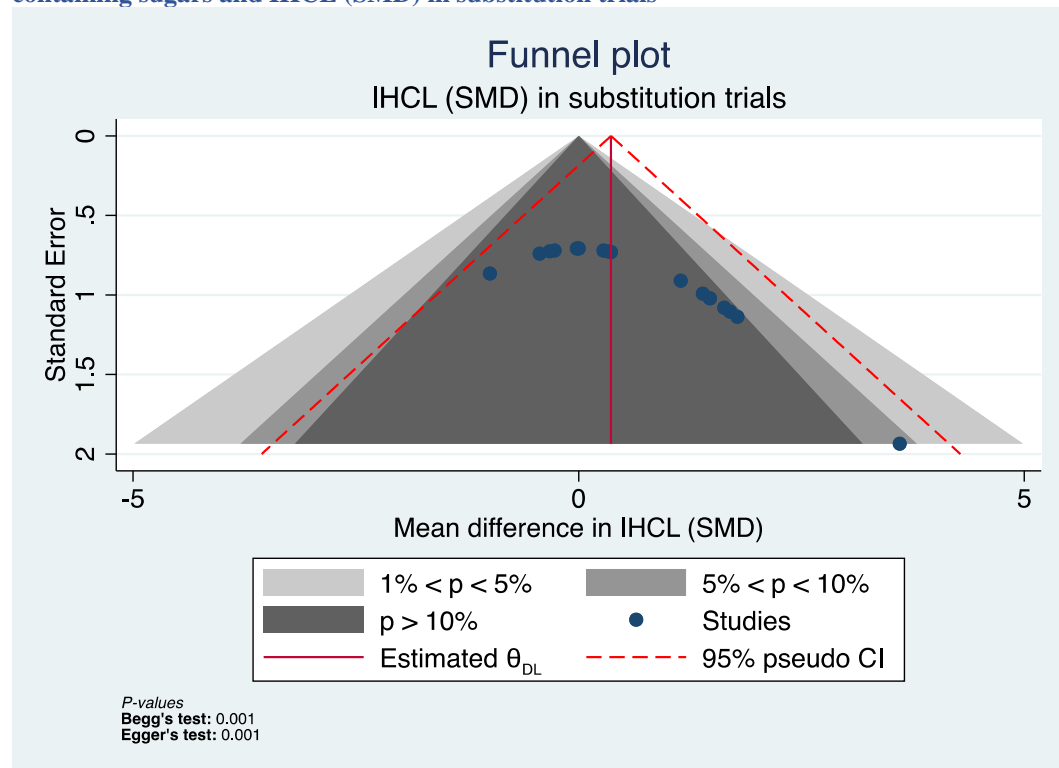

Contour-enhanced funnel plot is a scatterplot of each trial weighted mean difference on the x-axis with the standard error representing precision on the y-axis. The vertical solid red line represents the pooled effect estimate and the dashed red lines represent the pseudo-95% confidence limits. The blue dots represent individual trials. The contour regions define the regions for the test of significance of individual trial effect size for a given p-value range >0.100 (dark grey), 0.500 to <0.100 (medium grey), 0.010 to <0.500 (light grey), <0.0100 (white)]. The contour-enhanced funnel plots may suggest funnel-plot asymmetry is due to publication bias when less precise (smaller) trials are missing in the non-significant regions. Quantitative assessment of publication bias was also performed using Egger's and Begg's tests set at a significance level of  $p < 0.100$ .  
 CI=confidence interval; IHCL=intrahepatocellular lipid; DL=DerSimonian Laird; SMD=standardized mean difference.

**Supplementary Figure S90: Publication bias funnel plots for the effect of important food sources of fructose-containing sugars and IHCL (SMD) in addition trials\***

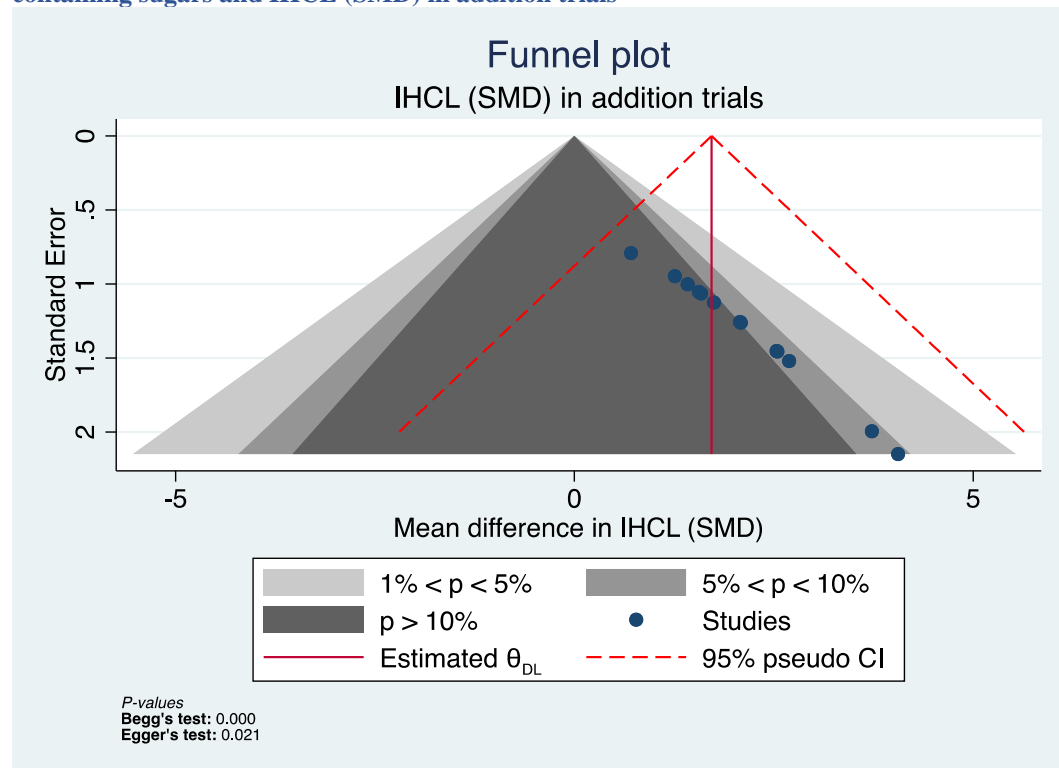

Contour-enhanced funnel plot is a scatterplot of each trial weighted mean difference on the x-axis with the standard error representing precision on the y-axis. The vertical solid red line represents the pooled effect estimate and the dashed red lines represent the pseudo-95% confidence limits. The blue dots represent individual trials. The contour regions define the regions for the test of significance of individual trial effect size for a given p-value range >0.100 (dark grey), 0.500 to <0.100 (medium grey), 0.010 to <0.500 (light grey), <0.0100 (white)]. The contour-enhanced funnel plots may suggest funnel-plot asymmetry is due to publication bias when less precise (smaller) trials are missing in the non-significant regions. Quantitative assessment of publication bias was also performed using Egger's and Begg's tests set at a significance level of  $p < 0.100$ .

\*All included addition trials were sugar-sweetened beverages.

CI=confidence interval; IHCL=intrahepatocellular lipid; SMD=standardized mean difference. CI=confidence interval; DL=DerSimonian Laird; IHCL=intrahepatocellular lipid; SMD=standardized mean difference.

**Supplementary Figure S91: Publication bias funnel plots for the effect of important food sources of fructose-containing sugars and ALT (U/L) in substitution trials**

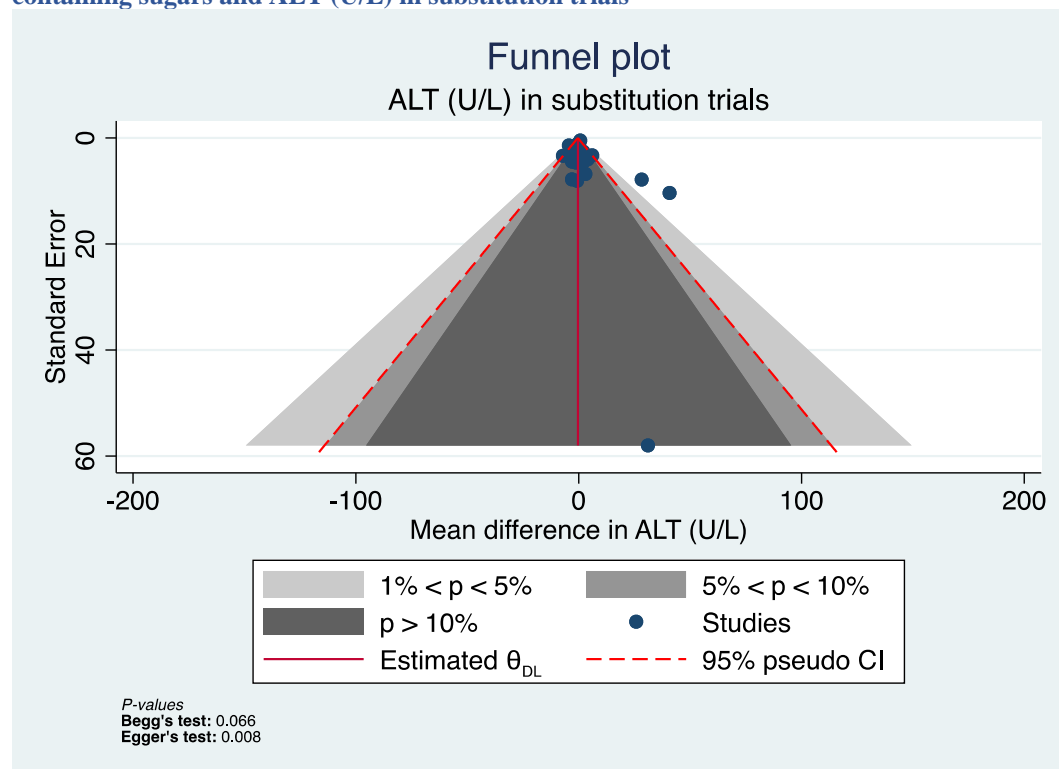

Contour-enhanced funnel plot is a scatterplot of each trial weighted mean difference on the x-axis with the standard error representing precision on the y-axis. The vertical solid red line represents the pooled effect estimate and the dashed red lines represent the pseudo-95% confidence limits. The blue dots represent individual trials. The contour regions define the regions for the test of significance of individual trial effect size for a given p-value range >0.100 (dark grey), 0.500 to <0.100 (medium grey), 0.010 to <0.500 (light grey), <0.0100 (white)]. The contour-enhanced funnel plots may suggest funnel-plot asymmetry is due to publication bias when less precise (smaller) trials are missing in the non-significant regions. Quantitative assessment of publication bias was also performed using Egger's and Begg's tests set at a significance level of  $p < 0.100$ .

ALT=alanine aminotransferase; CI=confidence interval; DL=DerSimonian Laird.



**Supplementary Figure S92: Publication bias funnel plots for the effect of important food sources of fructose-containing sugars and ALT (U/L) in addition trials**

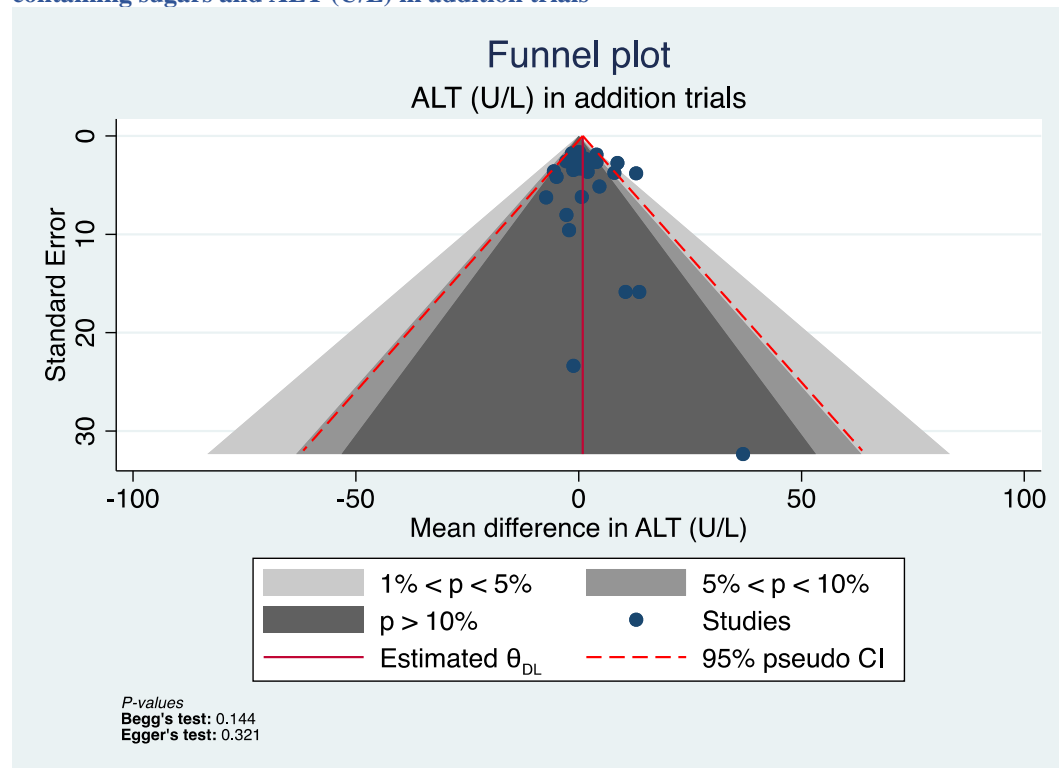

Contour-enhanced funnel plot is a scatterplot of each trial weighted mean difference on the x-axis with the standard error representing precision on the y-axis. The vertical solid red line represents the pooled effect estimate and the dashed red lines represent the pseudo-95% confidence limits. The blue dots represent individual trials. The contour regions define the regions for the test of significance of individual trial effect size for a given p-value range  $>0.100$  (dark grey),  $0.500$  to  $<0.100$  (medium grey),  $0.010$  to  $<0.500$  (light grey),  $<0.0100$  (white)]. The contour-enhanced funnel plots may suggest funnel-plot asymmetry is due to publication bias when less precise (smaller) trials are missing in the non-significant regions. Quantitative assessment of publication bias was also performed using Egger's and Begg's tests set at a significance level of  $p < 0.100$ . ALT=alanine aminotransferase; CI=confidence interval; DL=DerSimonian Laird.

**Supplementary Figure S93: Publication bias funnel plots for the effect of SSBs on ALT (U/L) in addition trials**

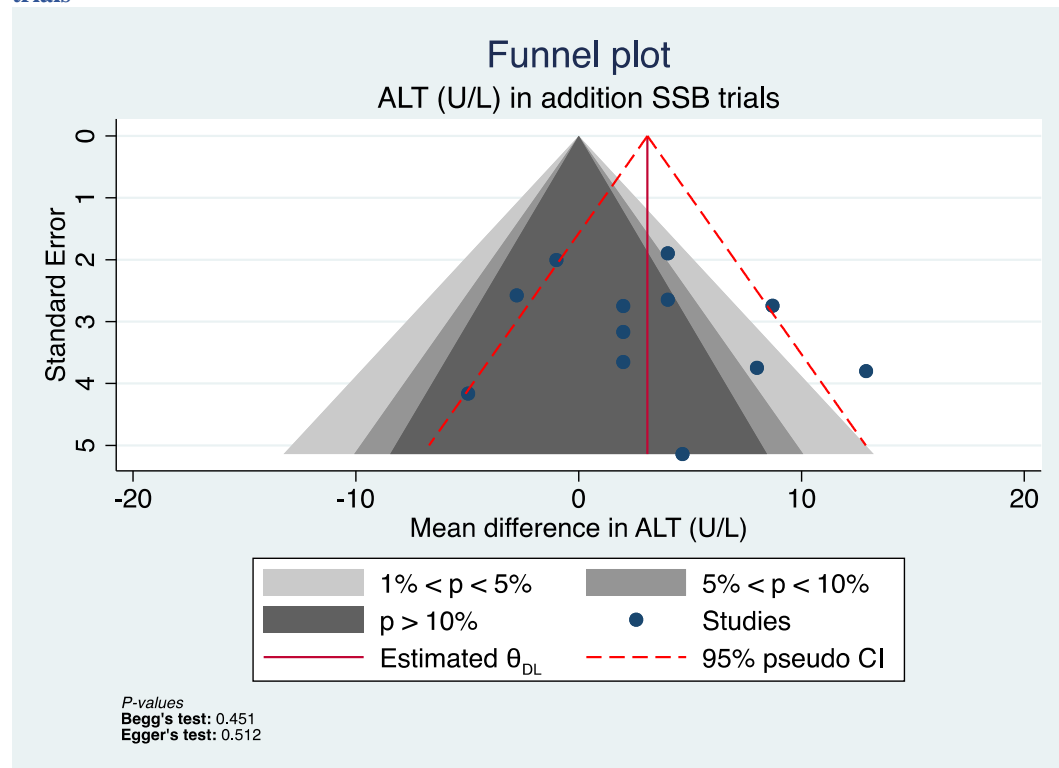

Contour-enhanced funnel plot is a scatterplot of each trial weighted mean difference on the x-axis with the standard error representing precision on the y-axis. The vertical solid red line represents the pooled effect estimate and the dashed red lines represent the pseudo-95% confidence limits. The blue dots represent individual trials. The contour regions define the regions for the test of significance of individual trial effect size for a given p-value range  $>0.100$  (dark grey),  $0.500$  to  $<0.100$  (medium grey),  $0.010$  to  $<0.500$  (light grey),  $<0.0100$  (white)]. The contour-enhanced funnel plots may suggest funnel-plot asymmetry is due to publication bias when less precise (smaller) trials are missing in the non-significant regions. Quantitative assessment of publication bias was also performed using Egger's and Begg's tests set at a significance level of  $p < 0.100$ .  
ALT=alanine aminotransferase; CI=confidence interval; DL=DerSimonian Laird; SSB=sugar-sweetened beverage.

**Supplementary Figure S94: Publication bias funnel plots for the effect of important food sources of fructose-containing sugars and AST (U/L) in substitution trials**

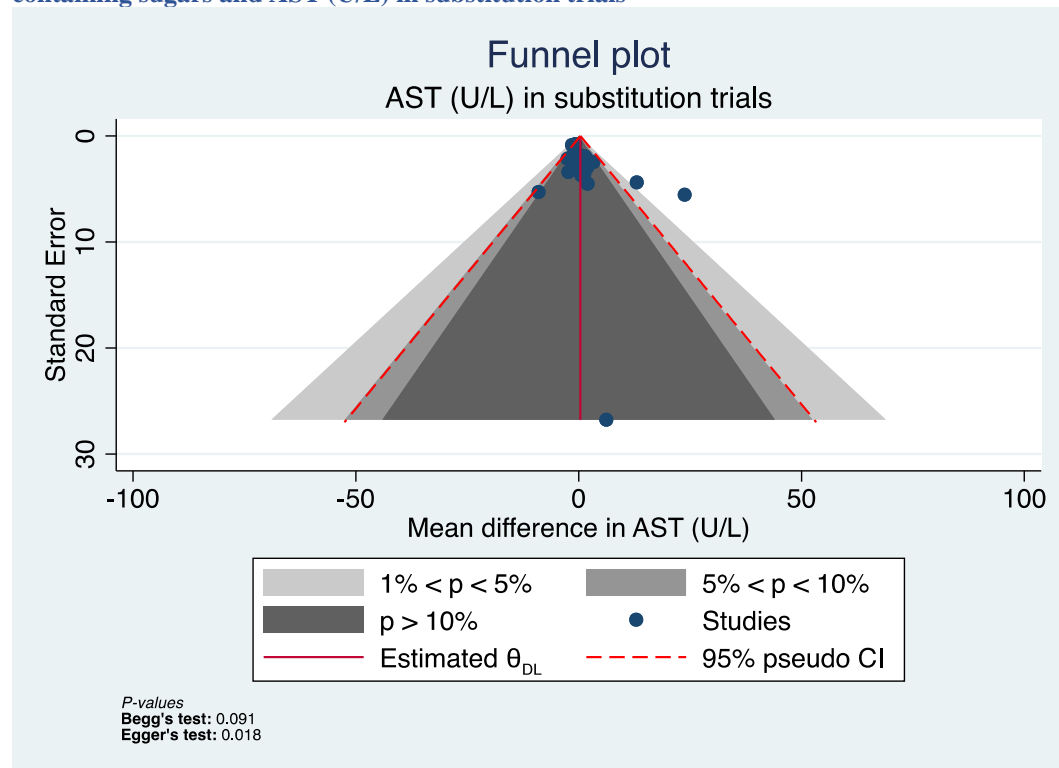

Contour-enhanced funnel plot is a scatterplot of each trial weighted mean difference on the x-axis with the standard error representing precision on the y-axis. The vertical solid red line represents the pooled effect estimate and the dashed red lines represent the pseudo-95% confidence limits. The blue dots represent individual trials. The contour regions define the regions for the test of significance of individual trial effect size for a given p-value range  $>0.100$  (dark grey),  $0.500$  to  $<0.100$  (medium grey),  $0.010$  to  $<0.500$  (light grey),  $<0.0100$  (white)]. The contour-enhanced funnel plots may suggest funnel-plot asymmetry is due to publication bias when less precise (smaller) trials are missing in the non-significant regions. Quantitative assessment of publication bias was also performed using Egger's and Begg's tests set at a significance level of  $p < 0.100$ .  
AST=aspartate aminotransferase; CI=confidence interval; DL=DerSimonian Laird.

**Supplementary Figure S95: Publication bias funnel plots for the effect of important food sources of fructose-containing sugars and AST (U/L) in addition trials**

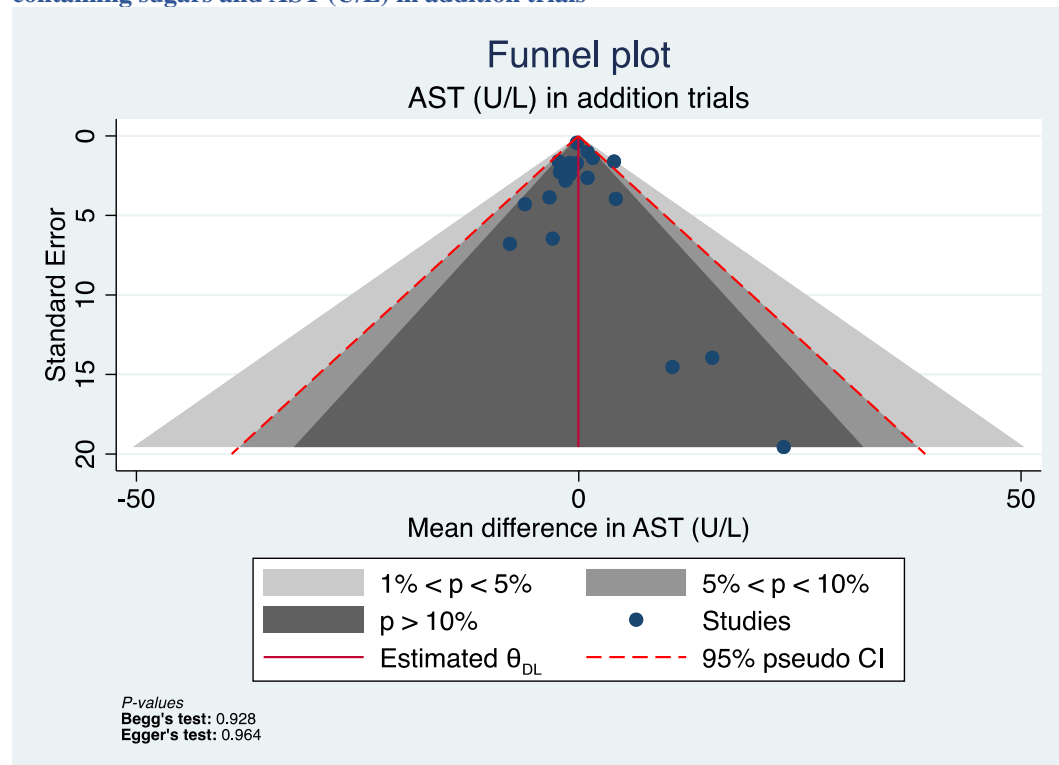

The dots represent individual trial comparisons. The vertical solid red line represents the pooled effect estimate as the weighted mean difference (MD) and the dashed red lines represent the pseudo-95% confidence limits. The contour regions define the regions of statistically significant and nonsignificant levels with dark grey representing  $p > 0.1$ , medium grey  $p > 0.05$  to  $\leq 0.1$ , light grey  $p \leq 0.01$  to  $p < 0.05$  and no shading  $p < 0.01$ . Publication bias is suspect if there are studies, especially smaller studies, that are missing in the nonsignificant regions. The p-values were derived from quantitative assessment of publication bias by Egger's and Begg's tests set at a significance level of  $p < 0.05$ .

AST=aspartate aminotransferase; CI=confidence interval; DL=DerSimonian Laird.

**Supplementary Figure S96: Trim and Fill funnel plot for the effect of important food sources of fructose-containing sugars IHCL (SMD) in substitution trials**

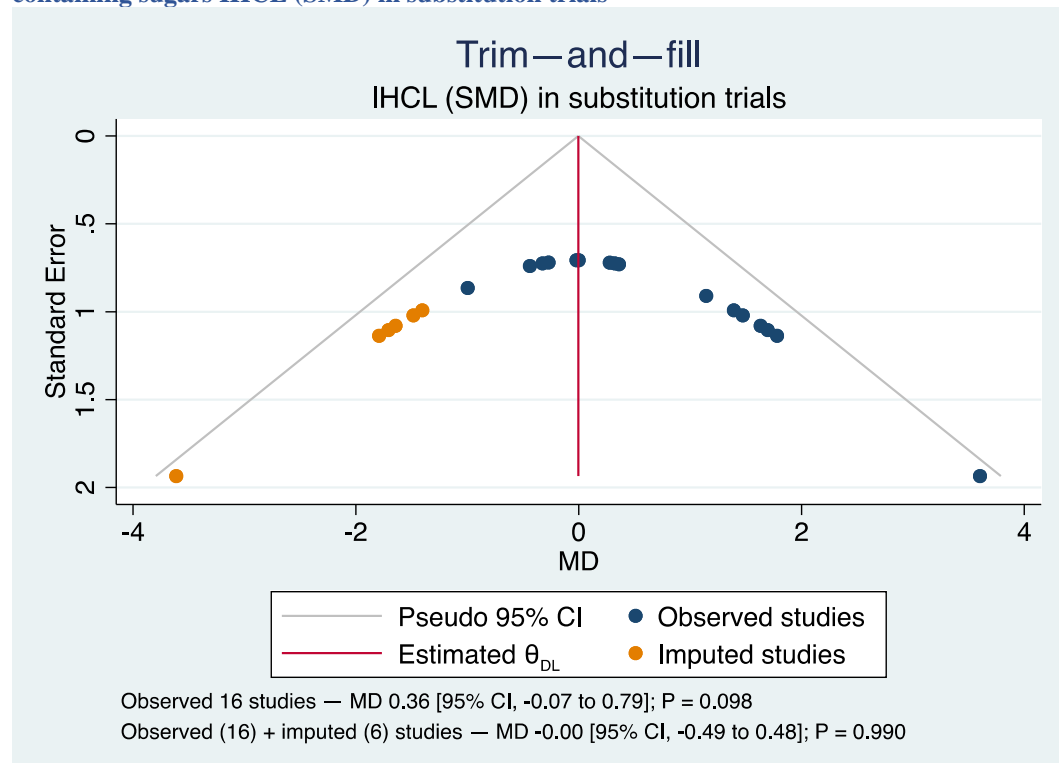

The vertical line represents the pooled effect estimate expressed as standardized mean difference. The diagonal lines represent the pseudo-95% confidence limits, the blue circles represent the effect estimate for each included study, and orange circles represent the effect estimate for each imputed “missed” study. Imputed random standardized mean difference is provided; when the imputed result differs from the primary result in either significance or magnitude ( $>1 \text{ MID} = 0.26 \text{ SMD units for IHCL}$ ), this is considered evidence of small-study effects. CI=confidence interval; DL=DerSimonian Laird; IHCL=intrahepatocellular lipid; SMD=standardized mean difference.

**Supplementary Figure S97: Trim and Fill funnel plot for the effect of important food sources of fructose-containing sugars IHCL (SMD) in addition trials**

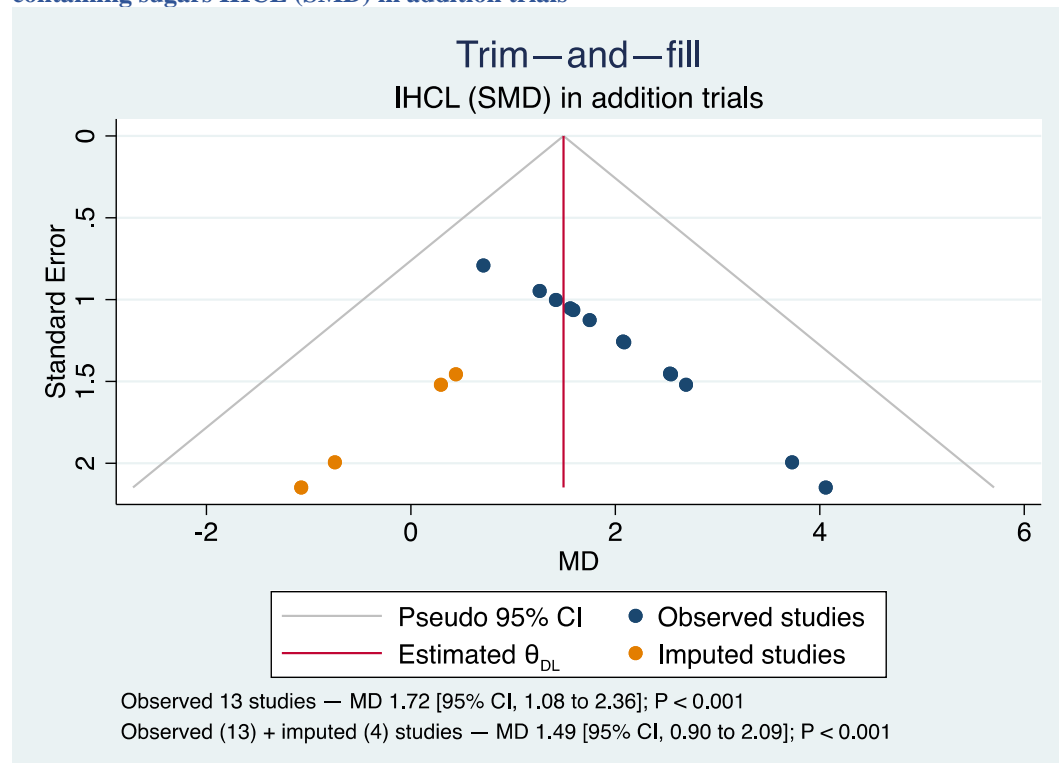

The vertical line represents the pooled effect estimate expressed as standardized mean difference. The diagonal lines represent the pseudo-95% confidence limits, the blue circles represent the effect estimate for each included study, and orange circles represent the effect estimate for each imputed “missed” study. Imputed random standardized mean difference is provided; when the imputed result differs from the primary result in either significance or magnitude ( $>1 \text{ MID} = 0.26 \text{ SMD units for IHCL}$ ), this is considered evidence of small-study effects. CI=confidence interval; DL=DerSimonian Laird; IHCL=intrahepatocellular lipid; SMD=standardized mean difference.

**Supplementary Figure S98: Trim and Fill funnel plot for the effect of important food sources of fructose-containing sugars ALT (U/L) in substitution trials**

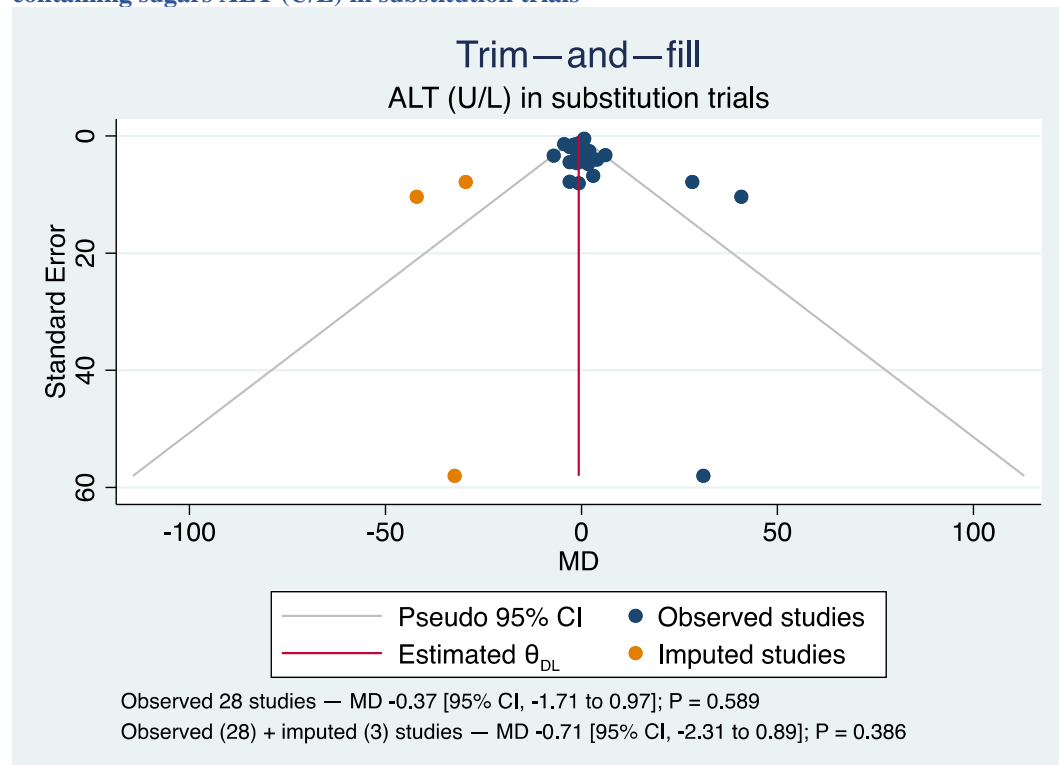

The vertical line represents the pooled effect estimate expressed as mean difference. The diagonal lines represent the pseudo-95% confidence limits, the blue circles represent the effect estimate for each included study, and orange circles represent the effect estimate for each imputed “missed” study. Imputed random mean difference is provided; when the imputed result differs from the primary result in either significance or magnitude ( $>1 \text{ MID} = 2.85 \text{ U/L}$  for ALT(2)), this is considered evidence of small-study effects.

ALT=alanine aminotransferase; CI=confidence interval; DL=DerSimonian Laird; MD=mean difference.

**Supplementary Figure S99: Trim and Fill funnel plot for the effect of important food sources of fructose-containing sugars AST (U/L) in substitution trials**

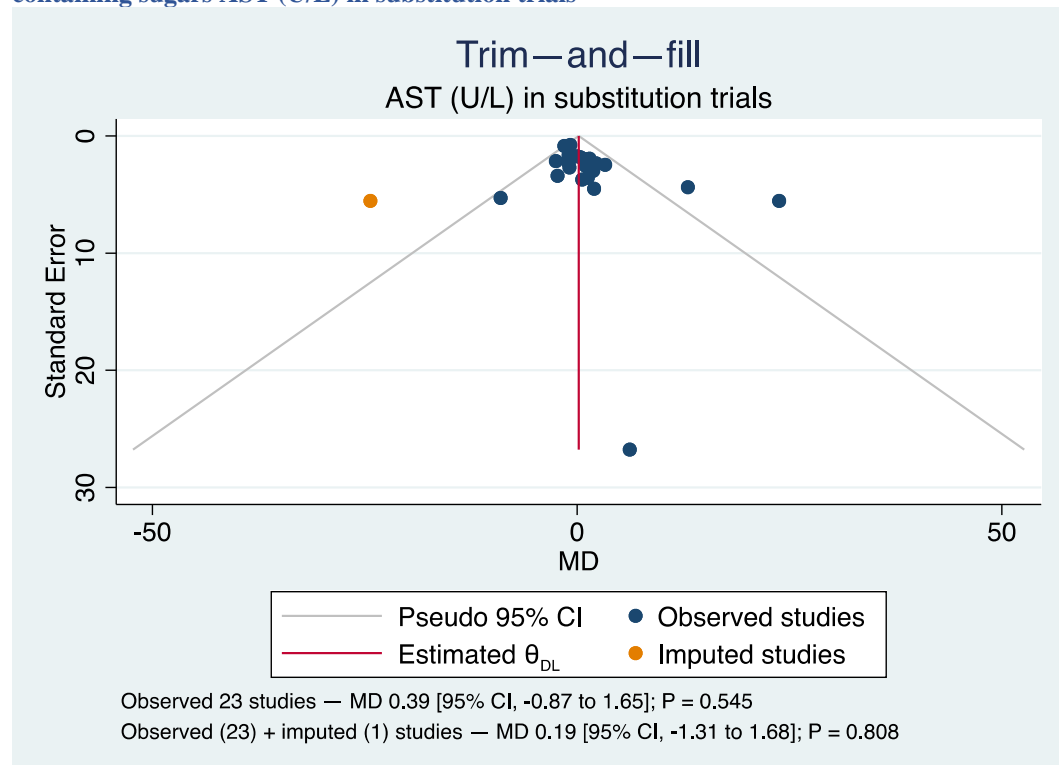

The vertical line represents the pooled effect estimate expressed as mean difference. The diagonal lines represent the pseudo-95% confidence limits, the blue circles represent the effect estimate for each included study, and orange circles represent the effect estimate for each imputed “missed” study. Imputed random mean difference is provided; when the imputed result differs from the primary result in either significance or magnitude ( $>1$  MID = 2.55U/L for AST(2)), this is considered evidence of small-study effects.

AST=aspartate aminotransferase; CI=confidence interval; MD=mean difference.



## Supplementary References

1. Page MJ, Moher D, Bossuyt PM, Boutron I, Hoffmann TC, Mulrow CD, et al. PRISMA 2020 explanation and elaboration: updated guidance and exemplars for reporting systematic reviews. *Bmj*. 2021;372:n160.
2. Tietz NW, Burtis, Carl A., Ashwood, Edward R. Tietz Textbook of Clinical Chemistry. 2 ed. Philadelphia: Saunders; 1994.
3. Santesso N, Glenton C, Dahm P, Garner P, Akl EA, Alper B, et al. GRADE guidelines 26: informative statements to communicate the findings of systematic reviews of interventions. *J Clin Epidemiol*. 2020;119:126-35.
4. Schünemann H BJ, Guyatt GOA. GRADE Handbook [Internet]. 2013 [cited 2018 Nov 10]. Available from: <https://handbook-5-1.cochrane.org>.
5. Balshem H, Helfand M, Schünemann HJ, Oxman AD, Kunz R, Brozek J, et al. GRADE guidelines: 3. Rating the quality of evidence. *J Clin Epidemiol*. 2011;64(4):401-6.
6. Wang YF, Chiavaroli L, Roke K, DiAngelo C, Marsden S, Sievenpiper J. Canadian Adults with Moderate Intakes of Total Sugars have Greater Intakes of Fibre and Key Micronutrients: Results from the Canadian Community Health Survey 2015 Public Use Microdata File. *Nutrients*. 2020;12(4).
